# Supplementary material for: Comprehensive pan-cancer analysis reveals the prognostic value and immunological role of SPIB
Source: publisher site journal article supplement (doi:10.18632/aging.204225), 2022-08-14
Supplement: Supplementary file [file aging-v14i15-204225-supplementary-material-SD1.pdf]

## SUPPLEMENTARY FIGURES

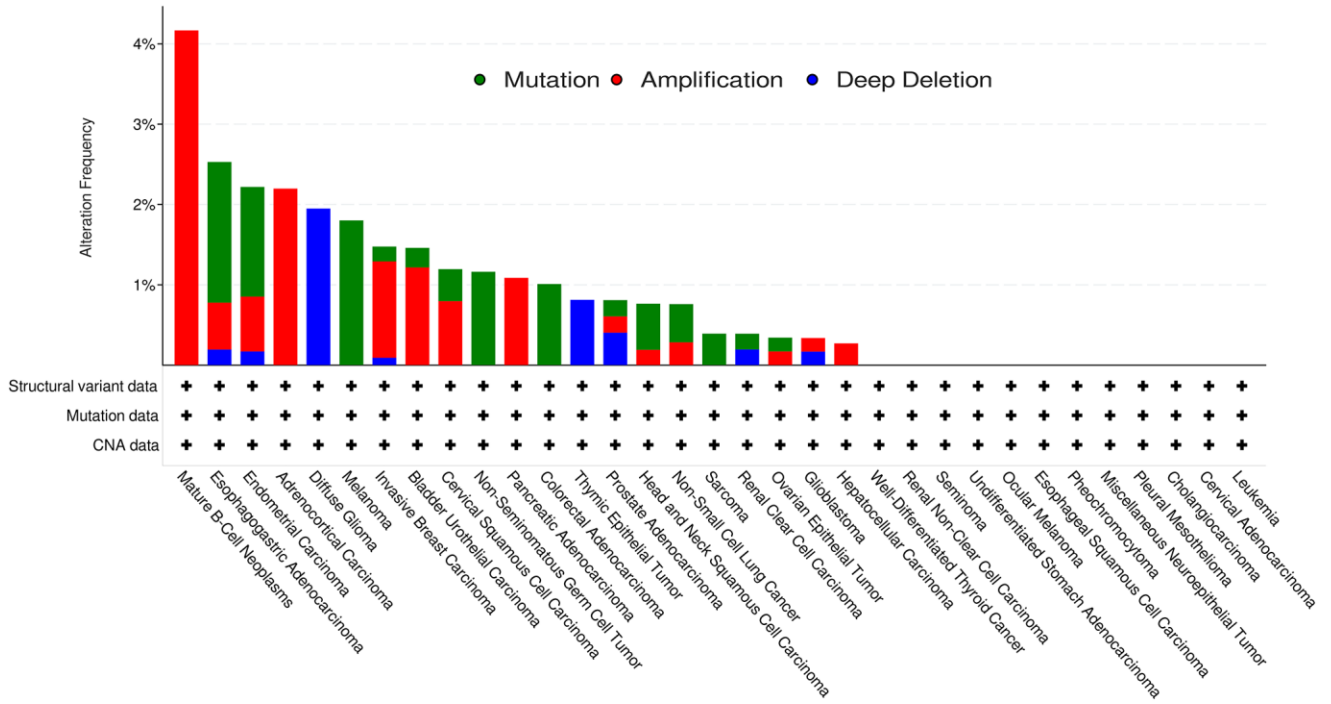

**Supplementary Figure 1. Mutation of SPIB in pan-cancer.** Analysis of genetic alteration type and mutation frequency of SPIB in different cancers based on the cBioPortal database.

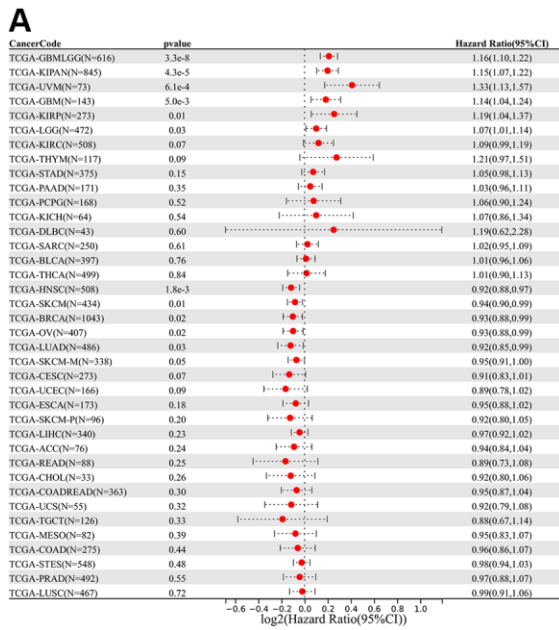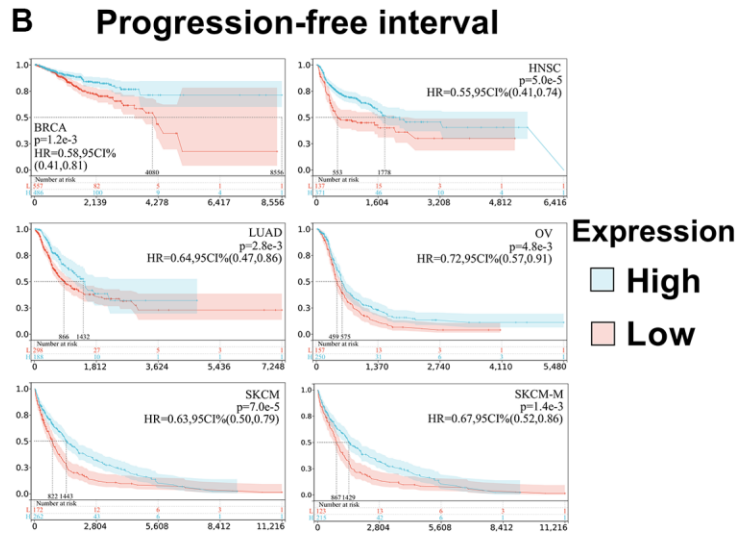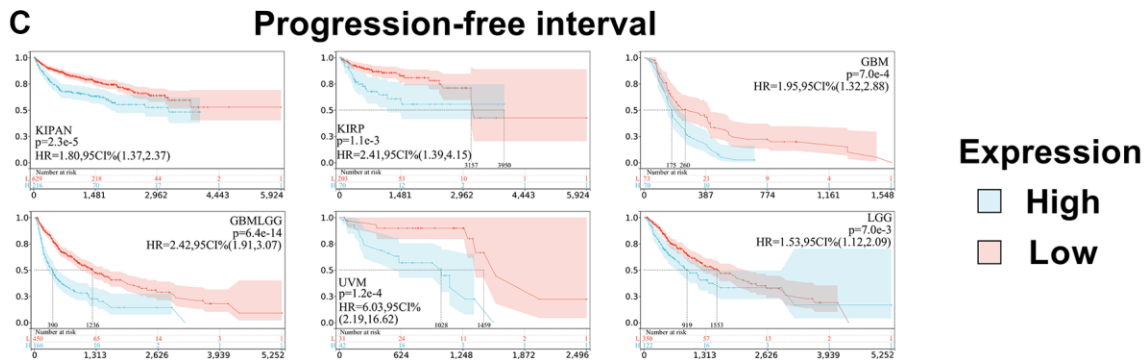

**Supplementary Figure 2. Relationship between SPIB expression and progression-free interval (PFI) in pan-cancer. (A)** Cox regression analysis of SPIB in 44 tumors. **(B)** Kaplan-Meier OS curves of SPIB expression in patients with GBMLGG, LGG, KIRP, KIPAN, GBM and UVM. **(C)** Kaplan-Meier OS curves of SPIB expression in patients with BRCA, LUAD, HNSC, SKCM, SKCM-M and OV. The vertical coordinate is the survival probability and the horizontal coordinate is the survival time (days).
