# Supplementary material for: Comprehensive pan-cancer analysis reveals the prognostic value and immunological role of SPIB
Source: Aging (Albany NY). 2022 Aug 14;14(15):6338–57. doi: 10.18632/aging.204225 (PMC9417235; doi:10.18632/aging.204225)
Supplement: Supplementary Table 1 [file aging-14-204225-s002.xlsx]

## Sheet: Pan-cancer dataset
Supplementary Table 1. Pan-cancer dataset.
	Group	Expression	SampleName
GBM(T=153,N=1157)	Tumor	1.8282	TCGA-19-1787-01
GBM(T=153,N=1157)	Tumor	-0.2498	TCGA-06-5412-01
GBM(T=153,N=1157)	Tumor	-2.4659	TCGA-16-0846-01
GBM(T=153,N=1157)	Tumor	-5.5735	TCGA-12-5299-01
GBM(T=153,N=1157)	Tumor	-3.3076	TCGA-06-2561-01
GBM(T=153,N=1157)	Tumor	-1.9379	TCGA-06-0132-01
GBM(T=153,N=1157)	Tumor	-0.0725	TCGA-26-5136-01
GBM(T=153,N=1157)	Tumor	-3.816	TCGA-27-2521-01
GBM(T=153,N=1157)	Tumor	-3.0469	TCGA-19-2629-01
GBM(T=153,N=1157)	Tumor	-1.4699	TCGA-06-0238-01
GBM(T=153,N=1157)	Tumor	-4.2934	TCGA-06-0749-01
GBM(T=153,N=1157)	Tumor	-1.9942	TCGA-06-0174-01
GBM(T=153,N=1157)	Tumor	-2.9324	TCGA-06-5414-01
GBM(T=153,N=1157)	Tumor	-6.5064	TCGA-28-5207-01
GBM(T=153,N=1157)	Tumor	-1.9942	TCGA-06-5410-01
GBM(T=153,N=1157)	Tumor	-1.7322	TCGA-06-0747-01
GBM(T=153,N=1157)	Tumor	-0.7834	TCGA-28-2513-01
GBM(T=153,N=1157)	Tumor	-3.6259	TCGA-76-4927-01
GBM(T=153,N=1157)	Tumor	-1.9379	TCGA-06-0645-01
GBM(T=153,N=1157)	Tumor	-2.6349	TCGA-06-2565-01
GBM(T=153,N=1157)	Tumor	-0.5973	TCGA-06-0130-01
GBM(T=153,N=1157)	Tumor	-2.3147	TCGA-06-0750-01
GBM(T=153,N=1157)	Tumor	-4.035	TCGA-27-1831-01
GBM(T=153,N=1157)	Tumor	-2.6349	TCGA-06-5416-01
GBM(T=153,N=1157)	Tumor	-2.8262	TCGA-06-0141-01
GBM(T=153,N=1157)	Tumor	-6.5064	TCGA-06-0125-01
GBM(T=153,N=1157)	Tumor	-3.6259	TCGA-76-4925-01
GBM(T=153,N=1157)	Tumor	-9.9658	TCGA-76-4932-01
GBM(T=153,N=1157)	Tumor	-4.2934	TCGA-28-2510-01
GBM(T=153,N=1157)	Tumor	-1.4305	TCGA-06-0743-01
GBM(T=153,N=1157)	Tumor	-2.3884	TCGA-14-1034-01
GBM(T=153,N=1157)	Tumor	-3.1714	TCGA-06-0184-01
GBM(T=153,N=1157)	Tumor	-3.6259	TCGA-12-3652-01
GBM(T=153,N=1157)	Tumor	-1.2481	TCGA-26-5132-01
GBM(T=153,N=1157)	Tumor	-4.2934	TCGA-32-1970-01
GBM(T=153,N=1157)	Tumor	-2.9324	TCGA-06-0219-01
GBM(T=153,N=1157)	Tumor	-4.6082	TCGA-14-0787-01
GBM(T=153,N=1157)	Tumor	-1.3921	TCGA-06-0190-01
GBM(T=153,N=1157)	Tumor	-1.2828	TCGA-26-5135-01
GBM(T=153,N=1157)	Tumor	-4.2934	TCGA-76-4931-01
GBM(T=153,N=1157)	Tumor	-3.6259	TCGA-41-3915-01
GBM(T=153,N=1157)	Tumor	-1.9379	TCGA-06-0649-01
GBM(T=153,N=1157)	Tumor	-4.6082	TCGA-12-0618-01
GBM(T=153,N=1157)	Tumor	-0.9686	TCGA-27-2524-01
GBM(T=153,N=1157)	Tumor	-1.2828	TCGA-28-1753-01
GBM(T=153,N=1157)	Tumor	-6.5064	TCGA-12-5295-01
GBM(T=153,N=1157)	Tumor	-3.1714	TCGA-27-2523-01
GBM(T=153,N=1157)	Tumor	-2.9324	TCGA-06-2569-01
GBM(T=153,N=1157)	Tumor	-1.9942	TCGA-27-1830-01
GBM(T=153,N=1157)	Tumor	-2.3147	TCGA-06-2559-01
GBM(T=153,N=1157)	Tumor	-6.5064	TCGA-27-2526-01
GBM(T=153,N=1157)	Tumor	-2.1779	TCGA-06-5856-01
GBM(T=153,N=1157)	Tumor	-2.9324	TCGA-26-1442-01
GBM(T=153,N=1157)	Tumor	-2.9324	TCGA-06-5418-01
GBM(T=153,N=1157)	Tumor	-2.4659	TCGA-26-5139-01
GBM(T=153,N=1157)	Tumor	-9.9658	TCGA-06-5417-01
GBM(T=153,N=1157)	Tumor	-9.9658	TCGA-26-5134-01
GBM(T=153,N=1157)	Tumor	-0.3383	TCGA-06-5413-01
GBM(T=153,N=1157)	Tumor	-1.7809	TCGA-76-4929-01
GBM(T=153,N=1157)	Tumor	-0.7834	TCGA-06-0646-01
GBM(T=153,N=1157)	Tumor	-9.9658	TCGA-12-3650-01
GBM(T=153,N=1157)	Tumor	-5.5735	TCGA-19-2620-01
GBM(T=153,N=1157)	Tumor	-5.5735	TCGA-28-5213-01
GBM(T=153,N=1157)	Tumor	-2.2447	TCGA-06-0138-01
GBM(T=153,N=1157)	Tumor	-5.0116	TCGA-06-5415-01
GBM(T=153,N=1157)	Tumor	-1.9942	TCGA-06-0139-01
GBM(T=153,N=1157)	Tumor	-0.3752	TCGA-02-0047-01
GBM(T=153,N=1157)	Tumor	-4.035	TCGA-14-0789-01
GBM(T=153,N=1157)	Tumor	-1.6394	TCGA-12-0616-01
GBM(T=153,N=1157)	Tumor	-0.7588	TCGA-32-1982-01
GBM(T=153,N=1157)	Tumor	-0.9406	TCGA-28-5220-01
GBM(T=153,N=1157)	Tumor	-2.9324	TCGA-14-0817-01
GBM(T=153,N=1157)	Tumor	-1.5522	TCGA-12-1597-01
GBM(T=153,N=1157)	Tumor	-5.5735	TCGA-06-2570-01
GBM(T=153,N=1157)	Tumor	-2.05292	TCGA-06-0211-01
GBM(T=153,N=1157)	Tumor	-1.7809	TCGA-02-2483-01
GBM(T=153,N=1157)	Tumor	0.92295	TCGA-06-0156-01
GBM(T=153,N=1157)	Tumor	-0.4719	TCGA-27-1837-01
GBM(T=153,N=1157)	Tumor	-1.2828	TCGA-28-5204-01
GBM(T=153,N=1157)	Tumor	-4.035	TCGA-32-5222-01
GBM(T=153,N=1157)	Tumor	-3.3076	TCGA-28-5209-01
GBM(T=153,N=1157)	Tumor	-0.3383	TCGA-27-2519-01
GBM(T=153,N=1157)	Tumor	-9.9658	TCGA-14-0790-01
GBM(T=153,N=1157)	Tumor	-1.8314	TCGA-12-0821-01
GBM(T=153,N=1157)	Tumor	-2.1779	TCGA-19-2619-01
GBM(T=153,N=1157)	Tumor	-1.1488	TCGA-27-1835-01
GBM(T=153,N=1157)	Tumor	-1.5951	TCGA-12-0619-01
GBM(T=153,N=1157)	Tumor	-1.1811	TCGA-06-0168-01
GBM(T=153,N=1157)	Tumor	-5.5735	TCGA-27-2528-01
GBM(T=153,N=1157)	Tumor	-1.8314	TCGA-28-5215-01
GBM(T=153,N=1157)	Tumor	-1.8836	TCGA-28-5218-01
GBM(T=153,N=1157)	Tumor	-4.6082	TCGA-14-1825-01
GBM(T=153,N=1157)	Tumor	-1.4699	TCGA-06-0129-01
GBM(T=153,N=1157)	Tumor	-4.2934	TCGA-06-5859-01
GBM(T=153,N=1157)	Tumor	-2.9324	TCGA-28-1747-01
GBM(T=153,N=1157)	Tumor	-9.9658	TCGA-28-2499-01
GBM(T=153,N=1157)	Tumor	-1.8836	TCGA-32-1980-01
GBM(T=153,N=1157)	Tumor	-2.0529	TCGA-06-2564-01
GBM(T=153,N=1157)	Tumor	-2.9324	TCGA-06-5408-01
GBM(T=153,N=1157)	Tumor	0.7058	TCGA-27-1832-01
GBM(T=153,N=1157)	Tumor	-3.0469	TCGA-14-1829-01
GBM(T=153,N=1157)	Tumor	-0.8599	TCGA-32-2615-01
GBM(T=153,N=1157)	Tumor	-0.4719	TCGA-06-0158-01
GBM(T=153,N=1157)	Tumor	-3.6259	TCGA-28-5216-01
GBM(T=153,N=1157)	Tumor	-9.9658	TCGA-41-2572-01
GBM(T=153,N=1157)	Tumor	-3.3076	TCGA-02-0055-01
GBM(T=153,N=1157)	Tumor	0.7058	TCGA-32-2634-01
GBM(T=153,N=1157)	Tumor	-1.5522	TCGA-06-5411-01
GBM(T=153,N=1157)	Tumor	-4.6082	TCGA-06-0744-01
GBM(T=153,N=1157)	Tumor	-1.4305	TCGA-76-4928-01
GBM(T=153,N=1157)	Tumor	-1.9942	TCGA-06-0644-01
GBM(T=153,N=1157)	Tumor	-9.9658	TCGA-14-0871-01
GBM(T=153,N=1157)	Tumor	-2.3147	TCGA-08-0386-01
GBM(T=153,N=1157)	Tumor	-1.8314	TCGA-32-2632-01
GBM(T=153,N=1157)	Tumor	-3.6259	TCGA-06-0882-01
GBM(T=153,N=1157)	Tumor	-3.6259	TCGA-41-4097-01
GBM(T=153,N=1157)	Tumor	-4.6082	TCGA-16-1045-01
GBM(T=153,N=1157)	Tumor	-0.2498	TCGA-19-2625-01
GBM(T=153,N=1157)	Tumor	-1.5522	TCGA-27-1834-01
GBM(T=153,N=1157)	Tumor	-5.0116	TCGA-41-2571-01
GBM(T=153,N=1157)	Tumor	-4.035	TCGA-19-4065-01
GBM(T=153,N=1157)	Tumor	-2.0529	TCGA-14-0781-01
GBM(T=153,N=1157)	Tumor	-1.8836	TCGA-06-0157-01
GBM(T=153,N=1157)	Tumor	-2.1779	TCGA-12-3653-01
GBM(T=153,N=1157)	Tumor	-4.2934	TCGA-76-4926-01
GBM(T=153,N=1157)	Tumor	-2.3884	TCGA-26-5133-01
GBM(T=153,N=1157)	Tumor	-2.8262	TCGA-06-2562-01
GBM(T=153,N=1157)	Tumor	-3.3076	TCGA-41-5651-01
GBM(T=153,N=1157)	Tumor	-2.5479	TCGA-06-0210-01
GBM(T=153,N=1157)	Tumor	-3.816	TCGA-19-2624-01
GBM(T=153,N=1157)	Tumor	-3.458	TCGA-19-5960-01
GBM(T=153,N=1157)	Tumor	-5.5735	TCGA-06-0686-01
GBM(T=153,N=1157)	Tumor	-3.6259	TCGA-06-2563-01
GBM(T=153,N=1157)	Tumor	-2.5479	TCGA-15-1444-01
GBM(T=153,N=1157)	Tumor	-3.816	TCGA-32-4213-01
GBM(T=153,N=1157)	Tumor	-6.5064	TCGA-15-0742-01
GBM(T=153,N=1157)	Tumor	-4.035	TCGA-06-0187-01
GBM(T=153,N=1157)	Tumor	-2.8262	TCGA-19-1390-01
GBM(T=153,N=1157)	Tumor	0.434	TCGA-06-2557-01
GBM(T=153,N=1157)	Tumor	-1.8314	TCGA-06-0878-01
GBM(T=153,N=1157)	Tumor	1.2696	TCGA-06-2567-01
GBM(T=153,N=1157)	Tumor	-1.6394	TCGA-32-2616-01
GBM(T=153,N=1157)	Tumor	-2.9324	TCGA-28-5208-01
GBM(T=153,N=1157)	Tumor	-4.035	TCGA-28-2514-01
GBM(T=153,N=1157)	Tumor	-2.3884	TCGA-06-1804-01
GBM(T=153,N=1157)	Tumor	-3.458	TCGA-14-2554-01
GBM(T=153,N=1157)	Tumor	-4.035	TCGA-02-2485-01
GBM(T=153,N=1157)	Tumor	-3.1714	TCGA-06-5858-01
GBM(T=153,N=1157)	Tumor	-2.8262	TCGA-06-0178-01
GBM(T=153,N=1157)	Tumor	-2.3147	TCGA-14-1823-01
GBM(T=153,N=1157)	Tumor	-2.3147	TCGA-28-2509-01
GBM(T=153,N=1157)	Tumor	-2.8262	TCGA-06-2558-01
GBM(T=153,N=1157)	Tumor	-3.816	TCGA-06-0745-01
GBM(T=153,N=1157)	Normal	-2.9324	GTEX-13QIC-0011-R1a-SM-5O9CJ
GBM(T=153,N=1157)	Normal	-9.9658	GTEX-N7MS-2526-SM-26GMA
GBM(T=153,N=1157)	Normal	-9.9658	GTEX-N7MS-2526-SM-26GMR
GBM(T=153,N=1157)	Normal	-4.2934	GTEX-NPJ7-0011-R6a-SM-2I3G7
GBM(T=153,N=1157)	Normal	-5.0116	GTEX-132Q8-3026-SM-5PNVG
GBM(T=153,N=1157)	Normal	-2.6349	GTEX-NPJ7-2726-SM-2I3FT
GBM(T=153,N=1157)	Normal	-1.8314	GTEX-13OVJ-0011-R9b-SM-5L3GD
GBM(T=153,N=1157)	Normal	-9.9658	GTEX-XLM4-0011-R10A-SM-4AT5P
GBM(T=153,N=1157)	Normal	-3.816	GTEX-12ZZZ-0011-R10a-SM-5P9HC
GBM(T=153,N=1157)	Normal	-6.5064	GTEX-X4XY-0011-R8A-SM-46MVC
GBM(T=153,N=1157)	Normal	-4.6082	GTEX-13QJC-0011-R6a-SM-5S2VI
GBM(T=153,N=1157)	Normal	-4.2934	GTEX-ZUA1-0011-R8b-SM-51MST
GBM(T=153,N=1157)	Normal	-9.9658	GTEX-13FHP-0011-R7b-SM-5LZYI
GBM(T=153,N=1157)	Normal	-9.9658	GTEX-11EMC-3326-SM-5P9JH
GBM(T=153,N=1157)	Normal	-4.2934	GTEX-13112-0011-R7b-SM-5DUVW
GBM(T=153,N=1157)	Normal	-5.0116	GTEX-12WSA-0011-R5b-SM-5GU5I
GBM(T=153,N=1157)	Normal	-9.9658	GTEX-ZF28-3026-SM-4WKHP
GBM(T=153,N=1157)	Normal	-6.5064	GTEX-ZUA1-0011-R7b-SM-4YCDP
GBM(T=153,N=1157)	Normal	-3.1714	GTEX-11ZVC-0011-R9a-SM-57WC5
GBM(T=153,N=1157)	Normal	-4.2934	GTEX-WZTO-0011-R4A-SM-3NMC7
GBM(T=153,N=1157)	Normal	-6.5064	GTEX-NPJ7-0011-R11A-SM-2I3E8
GBM(T=153,N=1157)	Normal	-6.5064	GTEX-13OVL-0011-R6a-SM-5L3G4
GBM(T=153,N=1157)	Normal	-9.9658	GTEX-13NYB-0011-R1b-SM-5KM4F
GBM(T=153,N=1157)	Normal	-4.6082	GTEX-WHSE-0011-R8A-SM-3P5Z1
GBM(T=153,N=1157)	Normal	-9.9658	GTEX-T6MN-0011-R4A-SM-32QPG
GBM(T=153,N=1157)	Normal	-2.0529	GTEX-ZDXO-0011-R1a-SM-4WKF4
GBM(T=153,N=1157)	Normal	-3.1714	GTEX-11DXY-3226-SM-5GIDE
GBM(T=153,N=1157)	Normal	-4.2934	GTEX-ZV68-0011-R5a-SM-4YCDW
GBM(T=153,N=1157)	Normal	-4.6082	GTEX-11GSP-0011-R6b-SM-57WBQ
GBM(T=153,N=1157)	Normal	-3.1714	GTEX-13OVL-0011-R3b-SM-5L3I8
GBM(T=153,N=1157)	Normal	-6.5064	GTEX-13OW7-0011-R5b-SM-5O9DM
GBM(T=153,N=1157)	Normal	-2.6349	GTEX-11WQK-3126-SM-5EGI2
GBM(T=153,N=1157)	Normal	-9.9658	GTEX-ZE9C-0011-R11a-SM-4WKGG
GBM(T=153,N=1157)	Normal	-9.9658	GTEX-ZZPT-2926-SM-5EQ5S
GBM(T=153,N=1157)	Normal	-5.5735	GTEX-12ZZY-3026-SM-5GCOU
GBM(T=153,N=1157)	Normal	-3.3076	GTEX-WHSE-2926-SM-3NMBG
GBM(T=153,N=1157)	Normal	-5.0116	GTEX-12ZZW-2926-SM-5LZUP
GBM(T=153,N=1157)	Normal	-3.6259	GTEX-12WSD-0011-R9a-SM-5GU6W
GBM(T=153,N=1157)	Normal	-5.5735	GTEX-YFC4-0011-R11a-SM-4SOK6
GBM(T=153,N=1157)	Normal	-3.3076	GTEX-X261-0011-R5A-SM-3NMB4
GBM(T=153,N=1157)	Normal	-4.2934	GTEX-11OC5-0626-SM-5HL6M
GBM(T=153,N=1157)	Normal	-6.5064	GTEX-ZVZQ-0011-R7b-SM-57WBB
GBM(T=153,N=1157)	Normal	-6.5064	GTEX-12ZZX-0011-R8a-SM-5DUW8
GBM(T=153,N=1157)	Normal	-9.9658	GTEX-13PDP-0011-R1a-SM-5PNX5
GBM(T=153,N=1157)	Normal	-1.5951	GTEX-11TTK-2926-SM-5PNYP
GBM(T=153,N=1157)	Normal	-4.035	GTEX-N7MS-0011-R3a-SM-5SI8H
GBM(T=153,N=1157)	Normal	-9.9658	GTEX-T6MN-2626-SM-32PMQ
GBM(T=153,N=1157)	Normal	-1.8314	GTEX-12WS9-0011-R5b-SM-5P9EV
GBM(T=153,N=1157)	Normal	-5.5735	GTEX-NL4W-0011-R9a-SM-2I3G1
GBM(T=153,N=1157)	Normal	-4.6082	GTEX-13X6J-3026-SM-5Q5CU
GBM(T=153,N=1157)	Normal	-4.6082	GTEX-145LS-0011-R10a-SM-5PNUQ
GBM(T=153,N=1157)	Normal	-5.0116	GTEX-13OVL-0011-R10a-SM-5L3GS
GBM(T=153,N=1157)	Normal	-9.9658	GTEX-14BIL-0011-R10a-SM-5SI75
GBM(T=153,N=1157)	Normal	-0.9971	GTEX-13FLV-0011-R10b-SM-5LZZ2
GBM(T=153,N=1157)	Normal	-9.9658	GTEX-13FLW-0011-R6b-SM-5L3EN
GBM(T=153,N=1157)	Normal	-3.816	GTEX-NL4W-0011-R10A-SM-2I3DY
GBM(T=153,N=1157)	Normal	-9.9658	GTEX-S7SE-0011-R7A-SM-2XCDI
GBM(T=153,N=1157)	Normal	-4.035	GTEX-139UC-0011-R7a-SM-5IJCV
GBM(T=153,N=1157)	Normal	-9.9658	GTEX-RNOR-0011-R4A-SM-3GAD3
GBM(T=153,N=1157)	Normal	-9.9658	GTEX-13FHO-2926-SM-5L3ES
GBM(T=153,N=1157)	Normal	-9.9658	GTEX-ZE7O-0011-R1a-SM-57WDM
GBM(T=153,N=1157)	Normal	-3.3076	GTEX-11ZUS-2826-SM-5EQKW
GBM(T=153,N=1157)	Normal	-9.9658	GTEX-WVLH-0011-R11A-SM-3MJFO
GBM(T=153,N=1157)	Normal	-9.9658	GTEX-13IVO-0011-R5a-SM-5L3CY
GBM(T=153,N=1157)	Normal	-9.9658	GTEX-11WQC-0011-R5a-SM-5BC74
GBM(T=153,N=1157)	Normal	-2.9324	GTEX-R55F-1326-SM-5S2V4
GBM(T=153,N=1157)	Normal	-9.9658	GTEX-T6MN-0011-R7A-SM-5CHSP
GBM(T=153,N=1157)	Normal	-2.3147	GTEX-RNOR-0011-R3A-SM-5SI8E
GBM(T=153,N=1157)	Normal	-4.6082	GTEX-13QIC-0011-R10a-SM-5O9C7
GBM(T=153,N=1157)	Normal	-3.458	GTEX-13QJC-0011-R7b-SM-5PNUM
GBM(T=153,N=1157)	Normal	-4.035	GTEX-12WSD-3126-SM-5HL7P
GBM(T=153,N=1157)	Normal	-4.035	GTEX-13OVL-0011-R4b-SM-5L3HV
GBM(T=153,N=1157)	Normal	-9.9658	GTEX-13X6I-0011-R2b-SM-5PNWQ
GBM(T=153,N=1157)	Normal	-6.5064	GTEX-1313W-0011-R8a-SM-5DUVM
GBM(T=153,N=1157)	Normal	-4.2934	GTEX-12ZZX-0011-R2a-SM-5EGLG
GBM(T=153,N=1157)	Normal	-5.5735	GTEX-X261-0011-R11A-SM-4E3JY
GBM(T=153,N=1157)	Normal	-9.9658	GTEX-13X6J-0011-R8b-SM-5PNUA
GBM(T=153,N=1157)	Normal	-4.6082	GTEX-ZF28-0011-R11a-SM-4WWEI
GBM(T=153,N=1157)	Normal	-9.9658	GTEX-ZF28-2926-SM-4WKG1
GBM(T=153,N=1157)	Normal	-1.9379	GTEX-13OVJ-0011-R3b-SM-5P9H6
GBM(T=153,N=1157)	Normal	-6.5064	GTEX-XOTO-0011-R11B-SM-4B64O
GBM(T=153,N=1157)	Normal	-3.3076	GTEX-ZVZQ-0011-R9a-SM-51MRH
GBM(T=153,N=1157)	Normal	-5.0116	GTEX-X261-0011-R7A-SM-4E3JJ
GBM(T=153,N=1157)	Normal	-3.816	GTEX-ZYY3-3026-SM-5GIEJ
GBM(T=153,N=1157)	Normal	-5.0116	GTEX-12WSM-0011-R1a-SM-5LZW6
GBM(T=153,N=1157)	Normal	-9.9658	GTEX-13IVO-0011-R3b-SM-5IJBJ
GBM(T=153,N=1157)	Normal	-4.6082	GTEX-13CZV-0011-R10b-SM-5LZYD
GBM(T=153,N=1157)	Normal	-6.5064	GTEX-145MI-0011-R7b-SM-5Q5AZ
GBM(T=153,N=1157)	Normal	-6.5064	GTEX-13OW7-0011-R3a-SM-5O9DA
GBM(T=153,N=1157)	Normal	-9.9658	GTEX-QVJO-0011-R7A-SM-2S1QO
GBM(T=153,N=1157)	Normal	-4.2934	GTEX-RNOR-0011-R1A-SM-5SI8F
GBM(T=153,N=1157)	Normal	-9.9658	GTEX-13JVG-0011-R11a-SM-5KM53
GBM(T=153,N=1157)	Normal	-9.9658	GTEX-11WQC-0011-R6a-SM-5BC77
GBM(T=153,N=1157)	Normal	-5.0116	GTEX-13JUV-0011-R9a-SM-5LZX3
GBM(T=153,N=1157)	Normal	-9.9658	GTEX-WL46-0011-R7A-SM-3LK7X
GBM(T=153,N=1157)	Normal	-4.2934	GTEX-13FTZ-0011-R10b-SM-5KLZS
GBM(T=153,N=1157)	Normal	-3.3076	GTEX-145MH-0011-R10b-SM-5PNUK
GBM(T=153,N=1157)	Normal	-3.6259	GTEX-12WSF-0011-R6b-SM-5HL8W
GBM(T=153,N=1157)	Normal	-2.3884	GTEX-13FXS-0011-R2b-SM-5K7XX
GBM(T=153,N=1157)	Normal	-3.3076	GTEX-RNOR-0011-R5A-SM-2TF4J
GBM(T=153,N=1157)	Normal	-1.8836	GTEX-TSE9-0011-R9A-SM-3DB7Q
GBM(T=153,N=1157)	Normal	-9.9658	GTEX-RVPU-0011-R11A-SM-2XCAF
GBM(T=153,N=1157)	Normal	-0.8863	GTEX-X4EP-0011-R6A-SM-3P629
GBM(T=153,N=1157)	Normal	-5.0116	GTEX-Y8DK-0011-R3A-SM-4RTW5
GBM(T=153,N=1157)	Normal	-5.0116	GTEX-13IVO-2926-SM-5L3CZ
GBM(T=153,N=1157)	Normal	-3.6259	GTEX-ZVT3-0011-R11b-SM-57WBI
GBM(T=153,N=1157)	Normal	-9.9658	GTEX-13OVL-3026-SM-5IJF1
GBM(T=153,N=1157)	Normal	-9.9658	GTEX-1445S-0011-R5a-SM-5PNUS
GBM(T=153,N=1157)	Normal	-1.1488	GTEX-13OVJ-0011-R7a-SM-5L3G1
GBM(T=153,N=1157)	Normal	-9.9658	GTEX-13OVH-0011-R11b-SM-5KM4X
GBM(T=153,N=1157)	Normal	-5.5735	GTEX-11WQC-0011-R10a-SM-57WCT
GBM(T=153,N=1157)	Normal	-9.9658	GTEX-11NV4-2126-SM-5N9DS
GBM(T=153,N=1157)	Normal	-9.9658	GTEX-13X6I-0011-R3b-SM-5P9HM
GBM(T=153,N=1157)	Normal	-9.9658	GTEX-Y111-2826-SM-4TT3O
GBM(T=153,N=1157)	Normal	-4.2934	GTEX-13O3O-0011-R3b-SM-5KM3R
GBM(T=153,N=1157)	Normal	-0.6416	GTEX-ZE9C-0011-R9a-SM-4WWCY
GBM(T=153,N=1157)	Normal	-5.0116	GTEX-13X6K-0011-R11a-SM-5P9F5
GBM(T=153,N=1157)	Normal	-2.8262	GTEX-12ZZX-0011-R10b-SM-5DUWK
GBM(T=153,N=1157)	Normal	-9.9658	GTEX-12WSA-0011-R8a-SM-5P9EX
GBM(T=153,N=1157)	Normal	-9.9658	TCGA-06-AABW-11
GBM(T=153,N=1157)	Normal	-2.7274	GTEX-X4XX-0011-R1B-SM-3P622
GBM(T=153,N=1157)	Normal	-5.0116	GTEX-13JVG-0011-R3b-SM-5LZXF
GBM(T=153,N=1157)	Normal	-9.9658	GTEX-ZAB4-0011-R6a-SM-4SOKD
GBM(T=153,N=1157)	Normal	-4.2934	GTEX-N7MT-0011-R2a-SM-2I3GI
GBM(T=153,N=1157)	Normal	-3.458	GTEX-13OW6-2926-SM-5KM29
GBM(T=153,N=1157)	Normal	-3.458	GTEX-12ZZW-0011-R5a-SM-5DUVN
GBM(T=153,N=1157)	Normal	-2.6349	GTEX-S7SE-0011-R4A-SM-2XCDB
GBM(T=153,N=1157)	Normal	-6.5064	GTEX-ZXG5-0011-R10a-SM-57WDD
GBM(T=153,N=1157)	Normal	-4.2934	GTEX-13FLV-0011-R6a-SM-5KLZ4
GBM(T=153,N=1157)	Normal	-5.5735	GTEX-ZAB4-0011-R7a-SM-4SOKE
GBM(T=153,N=1157)	Normal	-4.6082	GTEX-OHPN-0011-R10A-SM-33HBU
GBM(T=153,N=1157)	Normal	-5.5735	GTEX-13RTJ-0011-R7b-SM-5P9JS
GBM(T=153,N=1157)	Normal	-9.9658	GTEX-12WSC-2926-SM-5BC5Z
GBM(T=153,N=1157)	Normal	-2.1779	GTEX-13OVJ-0011-R10b-SM-5L3HT
GBM(T=153,N=1157)	Normal	-3.3076	GTEX-12ZZX-0011-R5a-SM-5HL89
GBM(T=153,N=1157)	Normal	-5.0116	GTEX-145LS-0011-R7a-SM-5PNWM
GBM(T=153,N=1157)	Normal	-9.9658	GTEX-N7MT-1226-SM-2TC6K
GBM(T=153,N=1157)	Normal	-9.9658	GTEX-X261-0011-R6B-SM-4E3J8
GBM(T=153,N=1157)	Normal	-3.3076	GTEX-13X6K-0011-R4b-SM-5P9HO
GBM(T=153,N=1157)	Normal	-2.9324	GTEX-1445S-0011-R8a-SM-5PNWX
GBM(T=153,N=1157)	Normal	-4.2934	GTEX-1128S-2826-SM-5N9DI
GBM(T=153,N=1157)	Normal	-3.0469	GTEX-WWYW-0011-R6A-SM-3NB3G
GBM(T=153,N=1157)	Normal	-6.5064	GTEX-147GR-0011-R4a-SM-5S2V2
GBM(T=153,N=1157)	Normal	-2.8262	GTEX-12WSB-0011-R6b-SM-5GU6J
GBM(T=153,N=1157)	Normal	-6.5064	GTEX-ZAK1-3026-SM-5S2MJ
GBM(T=153,N=1157)	Normal	-6.5064	GTEX-13S7M-0011-R7a-SM-5O9DK
GBM(T=153,N=1157)	Normal	-3.1714	GTEX-ZVT3-0011-R10b-SM-57WB6
GBM(T=153,N=1157)	Normal	1.2934	GTEX-QDT8-0011-R6A-SM-32PKI
GBM(T=153,N=1157)	Normal	-5.5735	GTEX-11PRG-2826-SM-5BC54
GBM(T=153,N=1157)	Normal	-3.6259	GTEX-ZE7O-0011-R6a-SM-57WCI
GBM(T=153,N=1157)	Normal	-9.9658	GTEX-12WSM-0011-R8a-SM-5DUWJ
GBM(T=153,N=1157)	Normal	-9.9658	GTEX-13PDP-0011-R8b-SM-5O9CS
GBM(T=153,N=1157)	Normal	-9.9658	GTEX-13NYB-0011-R8a-SM-5KM4R
GBM(T=153,N=1157)	Normal	-2.1779	GTEX-P44H-0011-R5A-SM-2XCEX
GBM(T=153,N=1157)	Normal	-5.5735	GTEX-13SLW-0011-R10a-SM-5S2UI
GBM(T=153,N=1157)	Normal	-9.9658	GTEX-Q2AG-0011-R9A-SM-2HMJ6
GBM(T=153,N=1157)	Normal	-4.2934	GTEX-14BIM-0011-R6b-SM-5S2VB
GBM(T=153,N=1157)	Normal	-3.816	GTEX-144FL-3026-SM-5O99C
GBM(T=153,N=1157)	Normal	-0.9406	GTEX-13FLV-0011-R8a-SM-5LZZE
GBM(T=153,N=1157)	Normal	-5.5735	GTEX-13CF2-0011-R8b-SM-5IJCX
GBM(T=153,N=1157)	Normal	-9.9658	GTEX-131YS-3126-SM-5KLYT
GBM(T=153,N=1157)	Normal	-5.0116	GTEX-13OW7-3026-SM-5L3GY
GBM(T=153,N=1157)	Normal	-0.5543	GTEX-13SLX-0011-R8b-SM-5PNWZ
GBM(T=153,N=1157)	Normal	-5.5735	GTEX-139T8-0011-R4a-SM-5HL54
GBM(T=153,N=1157)	Normal	-3.1714	GTEX-145LU-0011-R3a-SM-5P9K2
GBM(T=153,N=1157)	Normal	-2.5479	GTEX-WHSE-0011-R2A-SM-3P5ZL
GBM(T=153,N=1157)	Normal	-9.9658	GTEX-13FXS-0011-R5b-SM-5LZYE
GBM(T=153,N=1157)	Normal	0.2277	GTEX-13N2G-0011-R9b-SM-5MR4E
GBM(T=153,N=1157)	Normal	-5.0116	GTEX-13O3O-3126-SM-5KM3H
GBM(T=153,N=1157)	Normal	-9.9658	GTEX-13NZA-0011-R11b-SM-5KM4W
GBM(T=153,N=1157)	Normal	-5.0116	GTEX-13FLV-0011-R11a-SM-5LZZ7
GBM(T=153,N=1157)	Normal	-6.5064	GTEX-13OW8-0011-R3a-SM-5L3I4
GBM(T=153,N=1157)	Normal	-1.4699	GTEX-S7SE-0011-R5A-SM-2XCDA
GBM(T=153,N=1157)	Normal	-9.9658	GTEX-13X6I-0011-R5a-SM-5PNWW
GBM(T=153,N=1157)	Normal	-9.9658	GTEX-NPJ7-0011-R8a-SM-2I3G2
GBM(T=153,N=1157)	Normal	-6.5064	GTEX-X4XX-0011-R8B-SM-46MWM
GBM(T=153,N=1157)	Normal	-3.6259	GTEX-WVLH-0011-R5A-SM-3MJFW
GBM(T=153,N=1157)	Normal	-9.9658	GTEX-13FLW-0011-R5a-SM-5LZX6
GBM(T=153,N=1157)	Normal	-3.1714	GTEX-R55E-2526-SM-2TC6H
GBM(T=153,N=1157)	Normal	-3.816	GTEX-11ZTS-3226-SM-5EGID
GBM(T=153,N=1157)	Normal	-2.2447	GTEX-13N2G-0011-R4b-SM-5MR54
GBM(T=153,N=1157)	Normal	-9.9658	GTEX-YJ89-0011-R7a-SM-4V6GO
GBM(T=153,N=1157)	Normal	-9.9658	GTEX-UTHO-0011-R3A-SM-3GIK8
GBM(T=153,N=1157)	Normal	-4.6082	GTEX-13O3Q-0011-R6a-SM-5KM2V
GBM(T=153,N=1157)	Normal	-9.9658	GTEX-N7MT-0011-R4a-SM-2I3G9
GBM(T=153,N=1157)	Normal	-9.9658	GTEX-ZXG5-0011-R7b-SM-57WCC
GBM(T=153,N=1157)	Normal	-6.5064	GTEX-ZAB4-0011-R5a-SM-4SOKC
GBM(T=153,N=1157)	Normal	-2.114	GTEX-X4EP-0011-R7B-SM-4PQZW
GBM(T=153,N=1157)	Normal	-9.9658	GTEX-139UC-0011-R6b-SM-5K7Z1
GBM(T=153,N=1157)	Normal	-6.5064	GTEX-12WSC-0011-R9a-SM-5GU4U
GBM(T=153,N=1157)	Normal	-9.9658	GTEX-P44G-0011-R5A-SM-2I3FA
GBM(T=153,N=1157)	Normal	-6.5064	GTEX-11WQK-0011-R9b-SM-5BC6N
GBM(T=153,N=1157)	Normal	-1.4699	GTEX-X4EP-0011-R2B-SM-3P625
GBM(T=153,N=1157)	Normal	-9.9658	GTEX-13NYB-3226-SM-5J2ND
GBM(T=153,N=1157)	Normal	-5.0116	GTEX-11H98-0011-R8a-SM-5NQ8V
GBM(T=153,N=1157)	Normal	-9.9658	GTEX-N7MS-2526-SM-2D7W3
GBM(T=153,N=1157)	Normal	-1.9942	GTEX-13N1W-0011-R11a-SM-5MR3D
GBM(T=153,N=1157)	Normal	-1.9942	GTEX-13PLJ-0011-R9b-SM-5O9DV
GBM(T=153,N=1157)	Normal	-4.2934	GTEX-13PLJ-0011-R5a-SM-5O9BG
GBM(T=153,N=1157)	Normal	-9.9658	GTEX-144GL-2926-SM-5O99F
GBM(T=153,N=1157)	Normal	-5.0116	GTEX-XOTO-2926-SM-4B65G
GBM(T=153,N=1157)	Normal	-3.3076	GTEX-S7SE-0011-R10A-SM-2XCDF
GBM(T=153,N=1157)	Normal	-9.9658	GTEX-139TT-2626-SM-5LZUB
GBM(T=153,N=1157)	Normal	-2.6349	GTEX-X4XX-0011-R2A-SM-3P623
GBM(T=153,N=1157)	Normal	-0.394	GTEX-OHPN-0011-R9A-SM-4DXUH
GBM(T=153,N=1157)	Normal	-4.035	GTEX-ZVZQ-0011-R11a-SM-51MS6
GBM(T=153,N=1157)	Normal	-4.6082	GTEX-13CF2-0011-R7b-SM-5K7UV
GBM(T=153,N=1157)	Normal	-6.5064	GTEX-13PL6-0011-R6a-SM-5O9C5
GBM(T=153,N=1157)	Normal	-3.3076	GTEX-YFC4-0011-R2a-SM-4V6DZ
GBM(T=153,N=1157)	Normal	-2.2447	GTEX-QVJO-0011-R2A-SM-2S1QK
GBM(T=153,N=1157)	Normal	-4.035	GTEX-131YS-0011-R9b-SM-5EQLY
GBM(T=153,N=1157)	Normal	-9.9658	GTEX-145MG-0011-R3b-SM-5SI67
GBM(T=153,N=1157)	Normal	-3.458	GTEX-OXRO-0011-R2A-SM-3NB1W
GBM(T=153,N=1157)	Normal	-3.0469	GTEX-QVUS-2826-SM-3GADB
GBM(T=153,N=1157)	Normal	-4.6082	GTEX-11GSP-0011-R5a-SM-57WBE
GBM(T=153,N=1157)	Normal	-9.9658	GTEX-ZVT3-0011-R3b-SM-51MTJ
GBM(T=153,N=1157)	Normal	-9.9658	GTEX-Z93S-0011-R11a-SM-4RGNN
GBM(T=153,N=1157)	Normal	-5.0116	GTEX-11GS4-3126-SM-5A5LH
GBM(T=153,N=1157)	Normal	-3.1714	GTEX-13FHO-0011-R7b-SM-5LZXD
GBM(T=153,N=1157)	Normal	-2.9324	GTEX-13FHO-3026-SM-5J1O9
GBM(T=153,N=1157)	Normal	-3.0469	GTEX-P44G-0011-R2A-SM-2XCD2
GBM(T=153,N=1157)	Normal	-2.9324	GTEX-13RTL-0011-R1a-SM-5PNZ8
GBM(T=153,N=1157)	Normal	-9.9658	GTEX-12WSF-0011-R11a-SM-5LZVT
GBM(T=153,N=1157)	Normal	-6.5064	GTEX-13112-0011-R6b-SM-5DUVK
GBM(T=153,N=1157)	Normal	-9.9658	GTEX-13OVL-0011-R11b-SM-5L3G7
GBM(T=153,N=1157)	Normal	-2.9324	GTEX-ZAJG-3126-SM-5HL9J
GBM(T=153,N=1157)	Normal	-2.7274	GTEX-P44G-0011-R1A-SM-2I3FE
GBM(T=153,N=1157)	Normal	-3.816	GTEX-1192X-3126-SM-5N9BY
GBM(T=153,N=1157)	Normal	-4.2934	GTEX-13N2G-0011-R1b-SM-5MR3G
GBM(T=153,N=1157)	Normal	-2.8262	GTEX-ZV68-0011-R6a-SM-51MSR
GBM(T=153,N=1157)	Normal	-9.9658	GTEX-QVUS-0011-R3A-SM-3GAFD
GBM(T=153,N=1157)	Normal	-1.1811	GTEX-OHPN-0011-R9A-SM-2YUMN
GBM(T=153,N=1157)	Normal	-9.9658	GTEX-13SLW-0011-R1a-SM-5S2W7
GBM(T=153,N=1157)	Normal	-9.9658	GTEX-N7MT-0011-R7a-SM-2I3FZ
GBM(T=153,N=1157)	Normal	-9.9658	GTEX-13IVO-0011-R8a-SM-5L3DY
GBM(T=153,N=1157)	Normal	-9.9658	GTEX-Q2AG-0011-R11A-SM-2HMKZ
GBM(T=153,N=1157)	Normal	-9.9658	GTEX-144GL-0011-R5b-SM-5PNUJ
GBM(T=153,N=1157)	Normal	-5.5735	GTEX-144GL-0011-R3a-SM-5P9HP
GBM(T=153,N=1157)	Normal	-2.7274	GTEX-R55E-0011-R9A-SM-2TC6C
GBM(T=153,N=1157)	Normal	-3.816	GTEX-13X6J-0011-R11a-SM-5P9HE
GBM(T=153,N=1157)	Normal	-9.9658	GTEX-R55F-1226-SM-2TF59
GBM(T=153,N=1157)	Normal	-2.7274	GTEX-13CZV-0011-R11b-SM-5N9FN
GBM(T=153,N=1157)	Normal	-2.4659	GTEX-144GO-0011-R5a-SM-5PNUR
GBM(T=153,N=1157)	Normal	-9.9658	GTEX-N7MT-0011-R3a-SM-2I3GC
GBM(T=153,N=1157)	Normal	-1.9379	GTEX-132Q8-0011-R10b-SM-5DUWZ
GBM(T=153,N=1157)	Normal	-6.5064	GTEX-13PL6-0011-R9b-SM-5O9CH
GBM(T=153,N=1157)	Normal	-9.9658	GTEX-QMR6-0011-R11A-SM-32PKK
GBM(T=153,N=1157)	Normal	-2.9324	GTEX-ZDXO-0011-R8a-SM-4WWD7
GBM(T=153,N=1157)	Normal	-4.2934	GTEX-11EMC-3226-SM-5EGKW
GBM(T=153,N=1157)	Normal	-9.9658	GTEX-P44G-0011-R3A-SM-2I3FC
GBM(T=153,N=1157)	Normal	-4.6082	GTEX-12ZZW-0011-R10b-SM-5HL9X
GBM(T=153,N=1157)	Normal	-5.5735	GTEX-12WSE-0011-R6b-SM-5LZV5
GBM(T=153,N=1157)	Normal	-5.5735	GTEX-13FHP-0011-R1b-SM-5K7XL
GBM(T=153,N=1157)	Normal	-5.0116	GTEX-XMD1-0011-R10A-SM-4AT4A
GBM(T=153,N=1157)	Normal	-4.6082	GTEX-12WSD-0011-R3b-SM-5LZWN
GBM(T=153,N=1157)	Normal	-9.9658	GTEX-WZTO-0011-R8A-SM-4E3II
GBM(T=153,N=1157)	Normal	1.1577	GTEX-13FXS-0011-R9a-SM-5K7UI
GBM(T=153,N=1157)	Normal	-6.5064	GTEX-13O3Q-0011-R10b-SM-5KM39
GBM(T=153,N=1157)	Normal	-4.6082	GTEX-131YS-0011-R4a-SM-5DUVL
GBM(T=153,N=1157)	Normal	-1.5951	GTEX-13N2G-0011-R10a-SM-5MR34
GBM(T=153,N=1157)	Normal	-9.9658	GTEX-13OW8-0011-R6b-SM-5L3I3
GBM(T=153,N=1157)	Normal	-3.816	GTEX-13FLV-0011-R4a-SM-5LZYU
GBM(T=153,N=1157)	Normal	-4.2934	GTEX-ZVZQ-0011-R10b-SM-51MRT
GBM(T=153,N=1157)	Normal	-9.9658	GTEX-131XH-0011-R1a-SM-5DUWA
GBM(T=153,N=1157)	Normal	-4.2934	GTEX-P44H-0011-R10A-SM-2XCEK
GBM(T=153,N=1157)	Normal	-6.5064	GTEX-13OW7-0011-R4b-SM-5O9CX
GBM(T=153,N=1157)	Normal	-4.6082	GTEX-13OVH-0011-R6b-SM-5LUAX
GBM(T=153,N=1157)	Normal	-2.9324	GTEX-13NYS-0011-R9b-SM-5MR44
GBM(T=153,N=1157)	Normal	-9.9658	GTEX-RU72-0011-R10A-SM-2TF6D
GBM(T=153,N=1157)	Normal	-2.3147	GTEX-13OVJ-2826-SM-5L3GW
GBM(T=153,N=1157)	Normal	-9.9658	GTEX-11GSO-3026-SM-5Q5AL
GBM(T=153,N=1157)	Normal	-2.114	GTEX-WHSE-0011-R1A-SM-3P5ZK
GBM(T=153,N=1157)	Normal	-9.9658	GTEX-T6MN-0011-R4A-SM-5CHSD
GBM(T=153,N=1157)	Normal	-9.9658	GTEX-ZUA1-3026-SM-59HJC
GBM(T=153,N=1157)	Normal	-1.2481	GTEX-11GSP-0011-R8b-SM-5NQ79
GBM(T=153,N=1157)	Normal	-6.5064	GTEX-YJ89-0011-R2b-SM-4RGLT
GBM(T=153,N=1157)	Normal	-9.9658	GTEX-Q2AG-0011-R10A-SM-2HMLA
GBM(T=153,N=1157)	Normal	-9.9658	GTEX-WL46-0011-R5A-SM-3LK6V
GBM(T=153,N=1157)	Normal	-4.035	GTEX-145MG-0011-R7b-SM-5P9JY
GBM(T=153,N=1157)	Normal	-0.4521	GTEX-X4EP-0011-R9B-SM-4QASI
GBM(T=153,N=1157)	Normal	-9.9658	GTEX-13112-2926-SM-5DUWT
GBM(T=153,N=1157)	Normal	-9.9658	GTEX-TSE9-0011-R7A-SM-5CHS2
GBM(T=153,N=1157)	Normal	-4.6082	GTEX-11WQC-0011-R7b-SM-5BC7A
GBM(T=153,N=1157)	Normal	-9.9658	GTEX-12ZZZ-0011-R7b-SM-5EGLE
GBM(T=153,N=1157)	Normal	-6.5064	GTEX-13RTL-0011-R3a-SM-5P9JP
GBM(T=153,N=1157)	Normal	-9.9658	GTEX-13FHO-0011-R11b-SM-5LZYQ
GBM(T=153,N=1157)	Normal	-4.6082	GTEX-Q2AG-0011-R5A-SM-2HMJH
GBM(T=153,N=1157)	Normal	-6.5064	GTEX-13OVH-0011-R8b-SM-5MR35
GBM(T=153,N=1157)	Normal	-9.9658	GTEX-147GR-0011-R6b-SM-5S2RO
GBM(T=153,N=1157)	Normal	-9.9658	GTEX-132Q8-0011-R5a-SM-5IJDM
GBM(T=153,N=1157)	Normal	-4.6082	GTEX-WZTO-0011-R5B-SM-3NMC5
GBM(T=153,N=1157)	Normal	-3.1714	GTEX-11ONC-0011-R1a-SM-57WD4
GBM(T=153,N=1157)	Normal	-4.2934	GTEX-14BIN-0011-R10a-SM-5S2UA
GBM(T=153,N=1157)	Normal	-5.5735	GTEX-T2IS-0011-R6A-SM-32QP2
GBM(T=153,N=1157)	Normal	-9.9658	GTEX-144GL-0011-R8a-SM-5Q5B1
GBM(T=153,N=1157)	Normal	-4.2934	GTEX-13QIC-3026-SM-5LU58
GBM(T=153,N=1157)	Normal	-2.4659	GTEX-1313W-0011-R10b-SM-5DUXA
GBM(T=153,N=1157)	Normal	-0.9132	GTEX-YFC4-0011-R9a-SM-4SOK4
GBM(T=153,N=1157)	Normal	-4.035	GTEX-13O3Q-2926-SM-5KM45
GBM(T=153,N=1157)	Normal	-6.5064	GTEX-12126-0011-R9b-SM-5BC6P
GBM(T=153,N=1157)	Normal	-4.6082	GTEX-ZXG5-0011-R5b-SM-57WBN
GBM(T=153,N=1157)	Normal	-2.4659	GTEX-13OW7-0011-R1b-SM-5L3HF
GBM(T=153,N=1157)	Normal	-3.458	GTEX-13112-0011-R5b-SM-5DUV8
GBM(T=153,N=1157)	Normal	-1.5951	GTEX-T6MN-0011-R6A-SM-32QP8
GBM(T=153,N=1157)	Normal	-5.0116	GTEX-12584-0011-R6a-SM-5NQ7C
GBM(T=153,N=1157)	Normal	-9.9658	GTEX-13PDP-2926-SM-5N9E8
GBM(T=153,N=1157)	Normal	-4.6082	GTEX-ZE9C-0011-R5a-SM-5EGLO
GBM(T=153,N=1157)	Normal	-3.1714	GTEX-139UC-0011-R3b-SM-5K7VZ
GBM(T=153,N=1157)	Normal	-5.0116	GTEX-12WSC-0011-R10a-SM-5GU57
GBM(T=153,N=1157)	Normal	-4.2934	GTEX-117XS-3126-SM-5GIDP
GBM(T=153,N=1157)	Normal	-5.0116	GTEX-XOTO-0011-R8A-SM-4B65J
GBM(T=153,N=1157)	Normal	-3.816	GTEX-11H98-0011-R10b-SM-5NQ98
GBM(T=153,N=1157)	Normal	-3.6259	GTEX-11OF3-0011-R7a-SM-57WCG
GBM(T=153,N=1157)	Normal	-2.6349	GTEX-14ASI-3026-SM-5S2PN
GBM(T=153,N=1157)	Normal	-9.9658	GTEX-NPJ8-2626-SM-26GMI
GBM(T=153,N=1157)	Normal	-2.8262	GTEX-13CIG-0011-R9a-SM-5K7VU
GBM(T=153,N=1157)	Normal	-3.0469	GTEX-WWYW-0011-R1A-SM-3TW8G
GBM(T=153,N=1157)	Normal	-6.5064	GTEX-NL4W-0011-R6a-SM-2I3GA
GBM(T=153,N=1157)	Normal	-6.5064	GTEX-NPJ7-0011-R10A-SM-2I3E5
GBM(T=153,N=1157)	Normal	-9.9658	GTEX-13NYB-0011-R7a-SM-5MR5D
GBM(T=153,N=1157)	Normal	-5.5735	GTEX-13FLW-0011-R8b-SM-5J1MZ
GBM(T=153,N=1157)	Normal	-6.5064	GTEX-Q2AG-0011-R8A-SM-2HMK5
GBM(T=153,N=1157)	Normal	-4.6082	GTEX-13X6K-0011-R3b-SM-5PNUD
GBM(T=153,N=1157)	Normal	-3.458	GTEX-X585-0011-R1B-SM-46MVE
GBM(T=153,N=1157)	Normal	-0.3022	GTEX-13N2G-0011-R5a-SM-5MR33
GBM(T=153,N=1157)	Normal	-9.9658	GTEX-RVPU-0011-R6A-SM-2XCAC
GBM(T=153,N=1157)	Normal	-9.9658	GTEX-13X6I-0011-R11a-SM-5P9HN
GBM(T=153,N=1157)	Normal	-3.816	GTEX-13S7M-3126-SM-5RQJQ
GBM(T=153,N=1157)	Normal	-6.5064	GTEX-ZDXO-0011-R3a-SM-4WKFS
GBM(T=153,N=1157)	Normal	-3.3076	GTEX-13RTJ-0011-R3a-SM-5PNX7
GBM(T=153,N=1157)	Normal	-9.9658	GTEX-139UC-0011-R4a-SM-5K7XM
GBM(T=153,N=1157)	Normal	-1.8314	GTEX-X261-0011-R8A-SM-4E3I5
GBM(T=153,N=1157)	Normal	-9.9658	GTEX-12126-0926-SM-5FQTW
GBM(T=153,N=1157)	Normal	-3.1714	GTEX-14ASI-0011-R8b-SM-5S2UB
GBM(T=153,N=1157)	Normal	-5.0116	GTEX-14A5I-2826-SM-5SIBF
GBM(T=153,N=1157)	Normal	-6.5064	GTEX-12WSA-0011-R2a-SM-57WDK
GBM(T=153,N=1157)	Normal	-9.9658	GTEX-NPJ7-0011-R1a-SM-3GACT
GBM(T=153,N=1157)	Normal	-6.5064	GTEX-13N2G-0011-R6b-SM-5MR3P
GBM(T=153,N=1157)	Normal	-3.1714	GTEX-NPJ7-0011-R4a-SM-2I3GJ
GBM(T=153,N=1157)	Normal	-9.9658	GTEX-NL3H-0011-R6a-SM-2I3G8
GBM(T=153,N=1157)	Normal	-5.0116	GTEX-ZAB4-0011-R10a-SM-4SOKH
GBM(T=153,N=1157)	Normal	-3.6259	GTEX-13SLW-0011-R11a-SM-5SI8Q
GBM(T=153,N=1157)	Normal	-2.9324	GTEX-11WQK-3026-SM-5EQL6
GBM(T=153,N=1157)	Normal	-6.5064	GTEX-131XW-0011-R6b-SM-5K7XY
GBM(T=153,N=1157)	Normal	-9.9658	GTEX-N7MT-1126-SM-2YUNQ
GBM(T=153,N=1157)	Normal	-4.2934	GTEX-WL46-2926-SM-3LK82
GBM(T=153,N=1157)	Normal	-4.2934	GTEX-ZDXO-2926-SM-4WKFM
GBM(T=153,N=1157)	Normal	-9.9658	GTEX-1399T-0011-R4b-SM-5DUVX
GBM(T=153,N=1157)	Normal	-4.2934	GTEX-12ZZW-0011-R7a-SM-5DUWC
GBM(T=153,N=1157)	Normal	-3.6259	GTEX-1445S-0011-R2b-SM-5PNUH
GBM(T=153,N=1157)	Normal	-9.9658	GTEX-R55E-0011-R11A-SM-2TC6I
GBM(T=153,N=1157)	Normal	-4.6082	GTEX-QMR6-1326-SM-32PLB
GBM(T=153,N=1157)	Normal	-5.5735	GTEX-147F4-0011-R8b-SM-5S2UN
GBM(T=153,N=1157)	Normal	-9.9658	GTEX-139TS-0011-R10a-SM-5K7TU
GBM(T=153,N=1157)	Normal	-1.9942	GTEX-12WSB-0011-R7b-SM-5GU6V
GBM(T=153,N=1157)	Normal	-9.9658	GTEX-13IVO-0011-R11b-SM-5LZXQ
GBM(T=153,N=1157)	Normal	-4.035	GTEX-1212Z-0011-R1b-SM-5BC72
GBM(T=153,N=1157)	Normal	-5.0116	GTEX-Q2AG-0011-R2A-SM-2HMIT
GBM(T=153,N=1157)	Normal	-4.2934	GTEX-11H98-0011-R5b-SM-57WCF
GBM(T=153,N=1157)	Normal	-9.9658	GTEX-ZV68-0011-R7a-SM-51MT4
GBM(T=153,N=1157)	Normal	-5.0116	GTEX-12ZZY-0011-R10b-SM-5HL7W
GBM(T=153,N=1157)	Normal	-9.9658	GTEX-12WSC-0011-R5b-SM-5CVNS
GBM(T=153,N=1157)	Normal	-4.6082	GTEX-11GSO-2926-SM-5HL73
GBM(T=153,N=1157)	Normal	-9.9658	GTEX-13O3O-0011-R10a-SM-5LUA9
GBM(T=153,N=1157)	Normal	-6.5064	GTEX-12WSF-0011-R1a-SM-5DUVI
GBM(T=153,N=1157)	Normal	-6.5064	GTEX-12WSM-0011-R7b-SM-5EGLD
GBM(T=153,N=1157)	Normal	-5.0116	GTEX-139UC-3126-SM-5J1OY
GBM(T=153,N=1157)	Normal	-3.6259	GTEX-11GSP-0011-R10a-SM-5NQ7J
GBM(T=153,N=1157)	Normal	-5.5735	GTEX-ZF28-0011-R8a-SM-4WWFW
GBM(T=153,N=1157)	Normal	-6.5064	GTEX-RVPU-0011-R3A-SM-2XCAE
GBM(T=153,N=1157)	Normal	-9.9658	GTEX-RNOR-0011-R3A-SM-2TF5J
GBM(T=153,N=1157)	Normal	-1.3183	GTEX-13OVJ-0011-R2b-SM-5L3GP
GBM(T=153,N=1157)	Normal	-6.5064	GTEX-QMR6-0011-R5A-SM-32PKT
GBM(T=153,N=1157)	Normal	-4.035	GTEX-11WQC-0011-R11b-SM-57WD6
GBM(T=153,N=1157)	Normal	-9.9658	GTEX-11DXW-1026-SM-5H11K
GBM(T=153,N=1157)	Normal	-5.5735	GTEX-ZE9C-0011-R2a-SM-4WKGH
GBM(T=153,N=1157)	Normal	-3.0469	GTEX-14753-0011-R8b-SM-5S2U1
GBM(T=153,N=1157)	Normal	-4.2934	GTEX-13FHP-3026-SM-5IJBS
GBM(T=153,N=1157)	Normal	-9.9658	GTEX-13VXU-0011-R7b-SM-5SI72
GBM(T=153,N=1157)	Normal	-9.9658	GTEX-12WSE-0011-R7a-SM-5PNWF
GBM(T=153,N=1157)	Normal	-4.6082	GTEX-X585-3026-SM-46MWF
GBM(T=153,N=1157)	Normal	-3.0469	GTEX-12WSF-0011-R10a-SM-5LZVH
GBM(T=153,N=1157)	Normal	-9.9658	GTEX-ZE9C-0011-R4a-SM-4WKH6
GBM(T=153,N=1157)	Normal	-3.816	GTEX-14BIN-0011-R11a-SM-5SI79
GBM(T=153,N=1157)	Normal	-9.9658	GTEX-12ZZX-2926-SM-5GCOQ
GBM(T=153,N=1157)	Normal	-9.9658	GTEX-Y8DK-0011-R11A-SM-4SOK2
GBM(T=153,N=1157)	Normal	-2.6349	GTEX-WZTO-2926-SM-3NM9I
GBM(T=153,N=1157)	Normal	-1.5951	GTEX-WWYW-0011-R5A-SM-3NB3E
GBM(T=153,N=1157)	Normal	-9.9658	GTEX-13QJC-0011-R2b-SM-5PNUN
GBM(T=153,N=1157)	Normal	-2.4659	GTEX-13SLX-0011-R10a-SM-5P9HV
GBM(T=153,N=1157)	Normal	-9.9658	GTEX-RVPV-0011-R11A-SM-2TF6F
GBM(T=153,N=1157)	Normal	-9.9658	GTEX-12WSA-0011-R7b-SM-5GU5U
GBM(T=153,N=1157)	Normal	-6.5064	GTEX-1269C-3126-SM-5EGI6
GBM(T=153,N=1157)	Normal	-5.0116	GTEX-11WQK-0011-R10a-SM-5BC6R
GBM(T=153,N=1157)	Normal	-2.0529	GTEX-13OVJ-0011-R1b-SM-5L3I6
GBM(T=153,N=1157)	Normal	-2.6349	GTEX-139TS-0011-R2b-SM-5J1MX
GBM(T=153,N=1157)	Normal	-2.7274	GTEX-11OF3-0011-R6b-SM-57WBG
GBM(T=153,N=1157)	Normal	-3.3076	GTEX-13FHO-0011-R3b-SM-5K7YA
GBM(T=153,N=1157)	Normal	-9.9658	GTEX-RU72-0011-R5A-SM-2TF6U
GBM(T=153,N=1157)	Normal	-9.9658	GTEX-13OVL-0011-R1a-SM-5L3H5
GBM(T=153,N=1157)	Normal	-4.6082	GTEX-X4XX-0011-R11A-SM-46MWQ
GBM(T=153,N=1157)	Normal	-3.6259	GTEX-ZF28-0011-R5a-SM-4WWCZ
GBM(T=153,N=1157)	Normal	-9.9658	GTEX-NPJ7-0011-R9a-SM-2TC5R
GBM(T=153,N=1157)	Normal	-5.5735	GTEX-13OW6-0011-R10a-SM-5L3HE
GBM(T=153,N=1157)	Normal	-9.9658	GTEX-T6MN-0011-R1A-SM-32QOY
GBM(T=153,N=1157)	Normal	-9.9658	GTEX-RVPU-0011-R7A-SM-2XCAB
GBM(T=153,N=1157)	Normal	-3.816	GTEX-11GSP-0011-R7b-SM-57WC3
GBM(T=153,N=1157)	Normal	-5.0116	GTEX-12ZZX-0011-R6a-SM-5HL8L
GBM(T=153,N=1157)	Normal	-9.9658	GTEX-131XW-0011-R10a-SM-5DUVA
GBM(T=153,N=1157)	Normal	-5.0116	GTEX-UTHO-0011-R6A-SM-3GIJW
GBM(T=153,N=1157)	Normal	-4.6082	GTEX-13VXU-3026-SM-5LU3K
GBM(T=153,N=1157)	Normal	-2.0529	GTEX-T2IS-0011-R2A-SM-32QPF
GBM(T=153,N=1157)	Normal	-3.3076	TCGA-06-0681-11
GBM(T=153,N=1157)	Normal	-9.9658	GTEX-131XH-2926-SM-5LZU4
GBM(T=153,N=1157)	Normal	-9.9658	GTEX-139UC-0011-R5b-SM-5K7VY
GBM(T=153,N=1157)	Normal	-1.2828	GTEX-QDT8-0011-R5A-SM-32PKN
GBM(T=153,N=1157)	Normal	-9.9658	GTEX-13G51-0011-R10b-SM-5LZYF
GBM(T=153,N=1157)	Normal	-5.5735	GTEX-11DXW-1126-SM-5H12Q
GBM(T=153,N=1157)	Normal	-3.3076	GTEX-145LS-0011-R2a-SM-5PNZI
GBM(T=153,N=1157)	Normal	-3.816	GTEX-WL46-0011-R10A-SM-3MJFQ
GBM(T=153,N=1157)	Normal	-5.0116	GTEX-12WS9-0011-R6a-SM-5P9EW
GBM(T=153,N=1157)	Normal	-6.5064	GTEX-147GR-0011-R7a-SM-5S2RP
GBM(T=153,N=1157)	Normal	-2.7274	GTEX-13PL6-3126-SM-5LUAR
GBM(T=153,N=1157)	Normal	-4.2934	GTEX-12WSH-0011-R11a-SM-5LZVM
GBM(T=153,N=1157)	Normal	0.6699	GTEX-13SLX-0011-R2b-SM-5S2VP
GBM(T=153,N=1157)	Normal	-2.5479	GTEX-WHSE-0011-R4A-SM-3P5ZN
GBM(T=153,N=1157)	Normal	-9.9658	GTEX-12ZZW-0011-R3a-SM-5DUWW
GBM(T=153,N=1157)	Normal	-3.816	GTEX-13X6K-0011-R2b-SM-5P9K3
GBM(T=153,N=1157)	Normal	-6.5064	GTEX-13X6I-0011-R10a-SM-5PNWI
GBM(T=153,N=1157)	Normal	-4.035	GTEX-14BIM-0011-R11b-SM-5S2RN
GBM(T=153,N=1157)	Normal	-3.6259	GTEX-R55F-0011-R8A-SM-2TF4F
GBM(T=153,N=1157)	Normal	-4.6082	GTEX-11UD1-0011-R2b-SM-5BC6O
GBM(T=153,N=1157)	Normal	-5.0116	GTEX-147F4-0011-R6b-SM-5S2UP
GBM(T=153,N=1157)	Normal	-3.1714	GTEX-X585-0011-R11B-SM-46MUZ
GBM(T=153,N=1157)	Normal	-1.5105	GTEX-13SLX-3126-SM-5S2Q5
GBM(T=153,N=1157)	Normal	-2.7274	GTEX-11NV4-0011-R6a-SM-57WD5
GBM(T=153,N=1157)	Normal	-4.2934	GTEX-13CZV-0011-R7b-SM-5LZXH
GBM(T=153,N=1157)	Normal	-4.2934	GTEX-145LU-0011-R10a-SM-5PNWJ
GBM(T=153,N=1157)	Normal	-9.9658	GTEX-ZAB4-0011-R2a-SM-4RGNP
GBM(T=153,N=1157)	Normal	-4.2934	GTEX-11O72-2926-SM-5BC4V
GBM(T=153,N=1157)	Normal	-6.5064	GTEX-12WSH-0011-R10a-SM-5LZUS
GBM(T=153,N=1157)	Normal	-9.9658	GTEX-13FXS-0011-R6b-SM-5L3F7
GBM(T=153,N=1157)	Normal	-6.5064	GTEX-1313W-0011-R4b-SM-5KLZV
GBM(T=153,N=1157)	Normal	-5.5735	GTEX-Y8DK-0011-R6A-SM-4V6EG
GBM(T=153,N=1157)	Normal	-3.6259	GTEX-R55E-0011-R7A-SM-2TC5Z
GBM(T=153,N=1157)	Normal	-3.0469	GTEX-131YS-0011-R1a-SM-5DUXC
GBM(T=153,N=1157)	Normal	-4.6082	GTEX-13OW6-0011-R7b-SM-5L3H4
GBM(T=153,N=1157)	Normal	-9.9658	GTEX-ZVT3-3026-SM-5E43N
GBM(T=153,N=1157)	Normal	-9.9658	GTEX-13X6J-0011-R10b-SM-5PNWA
GBM(T=153,N=1157)	Normal	-3.1714	GTEX-11GSP-3126-SM-5A5LL
GBM(T=153,N=1157)	Normal	-4.6082	GTEX-13PL6-0011-R5b-SM-5O9BI
GBM(T=153,N=1157)	Normal	-3.0469	GTEX-11WQC-0011-R8b-SM-57WCH
GBM(T=153,N=1157)	Normal	-2.3147	GTEX-13OVJ-0011-R4b-SM-5P9H5
GBM(T=153,N=1157)	Normal	-9.9658	GTEX-13RTJ-0011-R2a-SM-5PNW9
GBM(T=153,N=1157)	Normal	-9.9658	GTEX-13FLW-0011-R7b-SM-5L3EZ
GBM(T=153,N=1157)	Normal	-4.035	GTEX-XMD1-0011-R1A-SM-4AT4C
GBM(T=153,N=1157)	Normal	-5.0116	GTEX-S7PM-0011-R6A-SM-3NM8F
GBM(T=153,N=1157)	Normal	-9.9658	GTEX-139UW-0011-R11a-SM-5IJGN
GBM(T=153,N=1157)	Normal	-9.9658	GTEX-1313W-3026-SM-5LZUZ
GBM(T=153,N=1157)	Normal	-9.9658	GTEX-139UC-3226-SM-5N9EZ
GBM(T=153,N=1157)	Normal	-4.6082	GTEX-WL46-0011-R9A-SM-3MJFP
GBM(T=153,N=1157)	Normal	-9.9658	GTEX-11ZU8-0011-R4a-SM-5BC6Y
GBM(T=153,N=1157)	Normal	-9.9658	GTEX-NL3H-0011-R3a-SM-2I3GL
GBM(T=153,N=1157)	Normal	-4.035	GTEX-N7MT-0011-R1a-SM-5SI7S
GBM(T=153,N=1157)	Normal	-1.8836	GTEX-13N1W-0011-R6a-SM-5MR43
GBM(T=153,N=1157)	Normal	-4.035	GTEX-13FLV-0011-R3b-SM-5LZYP
GBM(T=153,N=1157)	Normal	-2.7274	GTEX-T5JC-0011-R6A-SM-5SI89
GBM(T=153,N=1157)	Normal	-5.0116	GTEX-NPJ8-0011-R8a-SM-2HMLG
GBM(T=153,N=1157)	Normal	-1.9942	GTEX-1445S-0011-R10a-SM-5PNWB
GBM(T=153,N=1157)	Normal	-9.9658	GTEX-T2IS-2926-SM-32QPO
GBM(T=153,N=1157)	Normal	-2.6349	GTEX-131XW-0011-R11a-SM-5DUV9
GBM(T=153,N=1157)	Normal	-9.9658	GTEX-QVJO-1325-SM-2S1QX
GBM(T=153,N=1157)	Normal	-9.9658	GTEX-XMD1-0011-R3B-SM-4AT5R
GBM(T=153,N=1157)	Normal	-2.8262	GTEX-ZE7O-0011-R10a-SM-57WAZ
GBM(T=153,N=1157)	Normal	-9.9658	GTEX-13G51-3026-SM-5IJB8
GBM(T=153,N=1157)	Normal	-9.9658	GTEX-13FHP-0011-R11b-SM-5LZXP
GBM(T=153,N=1157)	Normal	-6.5064	GTEX-WWYW-0011-R11A-SM-3NB38
GBM(T=153,N=1157)	Normal	-3.458	GTEX-14ABY-0011-R5b-SM-5SI7B
GBM(T=153,N=1157)	Normal	-6.5064	GTEX-ZXG5-0011-R6a-SM-57WBZ
GBM(T=153,N=1157)	Normal	-2.7274	GTEX-X4EP-3026-SM-3P5YP
GBM(T=153,N=1157)	Normal	-2.114	GTEX-13OW7-0011-R8b-SM-5L3HR
GBM(T=153,N=1157)	Normal	-5.5735	GTEX-13RTJ-0011-R8b-SM-5O9DL
GBM(T=153,N=1157)	Normal	-9.9658	GTEX-12ZZZ-0011-R4b-SM-5DUV7
GBM(T=153,N=1157)	Normal	-5.0116	GTEX-13CZV-0011-R3a-SM-5KM27
GBM(T=153,N=1157)	Normal	-4.035	GTEX-N7MS-0011-R11A-SM-2HMJS
GBM(T=153,N=1157)	Normal	-3.6259	GTEX-12WSE-0011-R10b-SM-5P9JV
GBM(T=153,N=1157)	Normal	-5.5735	GTEX-13SLW-0011-R5b-SM-5SI6Z
GBM(T=153,N=1157)	Normal	-9.9658	GTEX-14753-0011-R10b-SM-5S2WE
GBM(T=153,N=1157)	Normal	-3.816	GTEX-13OW5-0011-R1b-SM-5L3GE
GBM(T=153,N=1157)	Normal	-9.9658	GTEX-14ABY-0011-R4b-SM-5S2VN
GBM(T=153,N=1157)	Normal	-9.9658	GTEX-NL3H-0011-R10A-SM-2I3E9
GBM(T=153,N=1157)	Normal	-4.2934	GTEX-145LU-2626-SM-5LU9Z
GBM(T=153,N=1157)	Normal	-2.8262	GTEX-WHSE-0011-R6A-SM-3P5ZP
GBM(T=153,N=1157)	Normal	-9.9658	GTEX-NPJ8-0011-R5a-SM-2HMJY
GBM(T=153,N=1157)	Normal	-4.6082	GTEX-13OW6-0011-R8a-SM-5L3GF
GBM(T=153,N=1157)	Normal	-4.2934	GTEX-ZDXO-0011-R7a-SM-4WWCU
GBM(T=153,N=1157)	Normal	-9.9658	GTEX-NPJ8-0011-R11A-SM-2YUMS
GBM(T=153,N=1157)	Normal	-9.9658	GTEX-139TS-0011-R6a-SM-5J2OB
GBM(T=153,N=1157)	Normal	-4.2934	GTEX-11NUK-2926-SM-5A5MD
GBM(T=153,N=1157)	Normal	-1.6394	GTEX-131XW-0011-R9a-SM-5N9EO
GBM(T=153,N=1157)	Normal	-3.458	GTEX-145LU-0011-R1a-SM-5Q5CE
GBM(T=153,N=1157)	Normal	-4.2934	GTEX-145LS-0011-R4b-SM-5S2UT
GBM(T=153,N=1157)	Normal	-5.0116	GTEX-ZF28-0011-R10a-SM-4WWEH
GBM(T=153,N=1157)	Normal	-6.5064	GTEX-144GO-0011-R1a-SM-5PNWO
GBM(T=153,N=1157)	Normal	-6.5064	GTEX-NPJ8-0011-R7a-SM-2HMJV
GBM(T=153,N=1157)	Normal	-0.8599	GTEX-X4EP-0011-R10B-SM-4QASJ
GBM(T=153,N=1157)	Normal	-3.6259	GTEX-NPJ8-0011-R9a-SM-2YUN5
GBM(T=153,N=1157)	Normal	-9.9658	GTEX-145MH-0011-R11a-SM-5P9HQ
GBM(T=153,N=1157)	Normal	-4.6082	GTEX-QVUS-0011-R6A-SM-3GACX
GBM(T=153,N=1157)	Normal	-9.9658	GTEX-WVLH-0011-R7A-SM-3MJFB
GBM(T=153,N=1157)	Normal	-5.5735	GTEX-144GL-0011-R4a-SM-5PNUI
GBM(T=153,N=1157)	Normal	-9.9658	GTEX-1445S-0011-R3a-SM-5P9HY
GBM(T=153,N=1157)	Normal	-2.6349	GTEX-14ABY-0011-R11a-SM-5SI7C
GBM(T=153,N=1157)	Normal	-9.9658	GTEX-13OW6-0011-R4a-SM-5O9DX
GBM(T=153,N=1157)	Normal	-5.0116	GTEX-ZVT3-0011-R8b-SM-57WDJ
GBM(T=153,N=1157)	Normal	-3.0469	GTEX-QVJO-0011-R4A-SM-2S1QL
GBM(T=153,N=1157)	Normal	-1.8314	GTEX-X4EP-0011-R5A-SM-3P628
GBM(T=153,N=1157)	Normal	-2.4659	GTEX-WVLH-0011-R2A-SM-3MJFJ
GBM(T=153,N=1157)	Normal	-9.9658	GTEX-13O3O-0011-R4b-SM-5KM3F
GBM(T=153,N=1157)	Normal	-3.6259	GTEX-13OVJ-0011-R11a-SM-5P9H8
GBM(T=153,N=1157)	Normal	-9.9658	GTEX-X4XX-0011-R7A-SM-46MWR
GBM(T=153,N=1157)	Normal	-0.8599	GTEX-12WSB-0011-R5b-SM-5GU67
GBM(T=153,N=1157)	Normal	-0.2845	GTEX-11ONC-0011-R9b-SM-5NQ8J
GBM(T=153,N=1157)	Normal	-1.9942	GTEX-13JUV-0011-R10b-SM-5LZXR
GBM(T=153,N=1157)	Normal	-3.816	GTEX-13OW6-0011-R1a-SM-5L3HQ
GBM(T=153,N=1157)	Normal	-9.9658	GTEX-13OW5-3126-SM-5MR3Y
GBM(T=153,N=1157)	Normal	-9.9658	GTEX-12WSE-2926-SM-5RQJ9
GBM(T=153,N=1157)	Normal	-9.9658	GTEX-TSE9-2926-SM-5CHQO
GBM(T=153,N=1157)	Normal	-3.0469	GTEX-13S7M-3026-SM-5S2QQ
GBM(T=153,N=1157)	Normal	-9.9658	GTEX-13JUV-3026-SM-5K7WX
GBM(T=153,N=1157)	Normal	-3.458	GTEX-12ZZX-0011-R11a-SM-5DUVJ
GBM(T=153,N=1157)	Normal	-9.9658	GTEX-13NYC-2826-SM-5K7WR
GBM(T=153,N=1157)	Normal	-3.3076	GTEX-13O3O-0011-R5b-SM-5KM44
GBM(T=153,N=1157)	Normal	-9.9658	GTEX-145LS-0011-R5a-SM-5SI65
GBM(T=153,N=1157)	Normal	-1.4305	GTEX-13JVG-0011-R10b-SM-5KM2P
GBM(T=153,N=1157)	Normal	-3.0469	GTEX-131XH-0011-R8a-SM-5EGLL
GBM(T=153,N=1157)	Normal	-2.114	TCGA-06-0675-11
GBM(T=153,N=1157)	Normal	-4.035	GTEX-139TT-0011-R5b-SM-5K7W8
GBM(T=153,N=1157)	Normal	-3.3076	GTEX-1445S-3026-SM-5O9BR
GBM(T=153,N=1157)	Normal	-4.2934	GTEX-RU72-3026-SM-5SI7Y
GBM(T=153,N=1157)	Normal	-9.9658	GTEX-N7MS-2425-SM-26GMD
GBM(T=153,N=1157)	Normal	-9.9658	GTEX-N7MT-1226-SM-26GMT
GBM(T=153,N=1157)	Normal	-9.9658	GTEX-N7MT-1226-SM-26GMC
GBM(T=153,N=1157)	Normal	-4.6082	GTEX-ZUA1-2926-SM-59HL3
GBM(T=153,N=1157)	Normal	-9.9658	GTEX-12WSM-2126-SM-5GCOC
GBM(T=153,N=1157)	Normal	-9.9658	GTEX-1445S-0011-R4a-SM-5PNWN
GBM(T=153,N=1157)	Normal	-3.458	GTEX-ZE9C-0011-R7a-SM-4WWCX
GBM(T=153,N=1157)	Normal	-5.0116	GTEX-1313W-0011-R6a-SM-5K7XO
GBM(T=153,N=1157)	Normal	-5.0116	GTEX-13RTL-0011-R9a-SM-5Q5BR
GBM(T=153,N=1157)	Normal	-6.5064	GTEX-13X6J-0011-R7b-SM-5PNUC
GBM(T=153,N=1157)	Normal	-5.0116	GTEX-145LS-0011-R1b-SM-5PNUP
GBM(T=153,N=1157)	Normal	-9.9658	GTEX-13NYB-0011-R5a-SM-5MR45
GBM(T=153,N=1157)	Normal	-2.4659	GTEX-QVUS-0011-R10A-SM-3GIK3
GBM(T=153,N=1157)	Normal	-1.0559	GTEX-Q2AG-2926-SM-2HMJ3
GBM(T=153,N=1157)	Normal	-9.9658	GTEX-13X6I-2926-SM-5Q5C3
GBM(T=153,N=1157)	Normal	-5.0116	GTEX-13FTY-0011-R9b-SM-5KM2U
GBM(T=153,N=1157)	Normal	-9.9658	GTEX-11ZVC-0011-R3a-SM-5BC6V
GBM(T=153,N=1157)	Normal	-1.9942	GTEX-13NYS-3126-SM-5KLYV
GBM(T=153,N=1157)	Normal	-5.5735	GTEX-13S7M-0011-R10b-SM-5PNZB
GBM(T=153,N=1157)	Normal	-5.0116	GTEX-13CZV-0011-R4b-SM-5J2NY
GBM(T=153,N=1157)	Normal	-9.9658	GTEX-131YS-0011-R7a-SM-5IJDA
GBM(T=153,N=1157)	Normal	-9.9658	GTEX-1477Z-0011-R10b-SM-5S2RF
GBM(T=153,N=1157)	Normal	-2.5479	GTEX-13NYS-0011-R4b-SM-5MR3O
GBM(T=153,N=1157)	Normal	-9.9658	GTEX-X4XX-2926-SM-3NMB1
GBM(T=153,N=1157)	Normal	-3.1714	GTEX-NPJ8-1526-SM-2D7VU
GBM(T=153,N=1157)	Normal	-5.5735	GTEX-WVLH-0011-R6A-SM-3MJFZ
GBM(T=153,N=1157)	Normal	-5.5735	GTEX-14A5I-2926-SM-5Q5CQ
GBM(T=153,N=1157)	Normal	-9.9658	GTEX-13PLJ-0011-R11b-SM-5O9BS
GBM(T=153,N=1157)	Normal	-4.6082	GTEX-11TTK-2826-SM-5GU5K
GBM(T=153,N=1157)	Normal	1.8879	GTEX-13SLX-0011-R9b-SM-5SI6X
GBM(T=153,N=1157)	Normal	-0.8863	GTEX-XMD1-2926-SM-4AT42
GBM(T=153,N=1157)	Normal	-9.9658	GTEX-X585-0011-R5A-SM-46MVI
GBM(T=153,N=1157)	Normal	-5.0116	GTEX-1399T-0011-R8b-SM-5IJD8
GBM(T=153,N=1157)	Normal	-1.3921	GTEX-13O1R-0011-R9b-SM-5KM33
GBM(T=153,N=1157)	Normal	-5.5735	GTEX-13JVG-0011-R4a-SM-5MR4C
GBM(T=153,N=1157)	Normal	-9.9658	GTEX-X4EP-0011-R11B-SM-4QASK
GBM(T=153,N=1157)	Normal	-5.0116	GTEX-YJ89-0011-R5a-SM-4V6GM
GBM(T=153,N=1157)	Normal	-9.9658	GTEX-14BIM-0011-R4b-SM-5S2RK
GBM(T=153,N=1157)	Normal	-5.0116	GTEX-13SLW-0011-R8b-SM-5SI64
GBM(T=153,N=1157)	Normal	-4.6082	GTEX-13QIC-0011-R8b-SM-5O9CV
GBM(T=153,N=1157)	Normal	-2.4659	GTEX-N7MS-0011-R8a-SM-2YUMK
GBM(T=153,N=1157)	Normal	-5.0116	GTEX-13NYB-0011-R10a-SM-5KM43
GBM(T=153,N=1157)	Normal	-6.5064	GTEX-14BIN-3326-SM-5Q5E6
GBM(T=153,N=1157)	Normal	-2.7274	GTEX-NPJ8-0011-R10A-SM-2YUMO
GBM(T=153,N=1157)	Normal	-9.9658	GTEX-1313W-0011-R5b-SM-5L3EP
GBM(T=153,N=1157)	Normal	-9.9658	GTEX-QVJO-0011-R10A-SM-2S1QJ
GBM(T=153,N=1157)	Normal	-3.1714	GTEX-Q2AG-0011-R4A-SM-2HMKA
GBM(T=153,N=1157)	Normal	-9.9658	GTEX-RVPU-0011-R4A-SM-2TF6X
GBM(T=153,N=1157)	Normal	-5.0116	GTEX-WHSE-0011-R7A-SM-3P5YZ
GBM(T=153,N=1157)	Normal	-4.6082	GTEX-P44G-0011-R10A-SM-2I3FF
GBM(T=153,N=1157)	Normal	-6.5064	GTEX-YFC4-0011-R1a-SM-4V6EH
GBM(T=153,N=1157)	Normal	-2.114	GTEX-131XH-0011-R10a-SM-5EGLJ
GBM(T=153,N=1157)	Normal	-9.9658	GTEX-13N2G-0011-R2a-SM-5MR4Q
GBM(T=153,N=1157)	Normal	-6.5064	GTEX-1128S-2726-SM-5H12C
GBM(T=153,N=1157)	Normal	-9.9658	GTEX-11ZVC-0011-R4a-SM-5BC6Z
GBM(T=153,N=1157)	Normal	-5.0116	GTEX-11GSO-0011-R3b-SM-57WB2
GBM(T=153,N=1157)	Normal	-6.5064	GTEX-WVLH-2926-SM-3MJG5
GBM(T=153,N=1157)	Normal	-3.3076	GTEX-RVPU-0011-R8A-SM-5SI8I
GBM(T=153,N=1157)	Normal	-9.9658	GTEX-12ZZX-0011-R3b-SM-5EGLH
GBM(T=153,N=1157)	Normal	-9.9658	GTEX-1313W-0011-R2a-SM-5EGLF
GBM(T=153,N=1157)	Normal	-3.816	GTEX-13O3Q-0011-R1b-SM-5KM3L
GBM(T=153,N=1157)	Normal	-9.9658	GTEX-XLM4-3026-SM-4AT6L
GBM(T=153,N=1157)	Normal	-4.2934	GTEX-12WSI-0011-R11b-SM-5P9EZ
GBM(T=153,N=1157)	Normal	-9.9658	GTEX-N7MS-0011-R4a-SM-2HMKW
GBM(T=153,N=1157)	Normal	-9.9658	GTEX-131YS-3026-SM-5EGHY
GBM(T=153,N=1157)	Normal	-4.6082	GTEX-13JUV-0011-R1a-SM-5LZY4
GBM(T=153,N=1157)	Normal	-6.5064	GTEX-1399T-0011-R2b-SM-5DUXM
GBM(T=153,N=1157)	Normal	-3.3076	GTEX-XOTO-0011-R7B-SM-4B64R
GBM(T=153,N=1157)	Normal	-9.9658	GTEX-12WSD-0011-R10b-SM-5GU79
GBM(T=153,N=1157)	Normal	-5.0116	GTEX-N7MS-0011-R6a-SM-2HMJ4
GBM(T=153,N=1157)	Normal	-9.9658	GTEX-13S7M-0011-R5b-SM-5P9HS
GBM(T=153,N=1157)	Normal	-6.5064	GTEX-12126-0011-R10b-SM-5BC6T
GBM(T=153,N=1157)	Normal	-3.0469	GTEX-QVJO-0011-R1A-SM-2S1QI
GBM(T=153,N=1157)	Normal	-5.5735	GTEX-XMD1-0011-R2B-SM-4AT5N
GBM(T=153,N=1157)	Normal	-9.9658	GTEX-RU72-0011-R11A-SM-2TF6J
GBM(T=153,N=1157)	Normal	-9.9658	GTEX-11UD1-0011-R3a-SM-5BC6S
GBM(T=153,N=1157)	Normal	-2.1779	GTEX-XOTO-0011-R1B-SM-4B65C
GBM(T=153,N=1157)	Normal	-4.2934	GTEX-13O3O-0011-R1b-SM-5KM2K
GBM(T=153,N=1157)	Normal	-9.9658	GTEX-14753-0011-R5a-SM-5S2VW
GBM(T=153,N=1157)	Normal	-9.9658	GTEX-12WS9-2826-SM-5FQU9
GBM(T=153,N=1157)	Normal	-5.0116	GTEX-145LS-0011-R3a-SM-5S2VJ
GBM(T=153,N=1157)	Normal	-9.9658	GTEX-R55E-0011-R8A-SM-2TC66
GBM(T=153,N=1157)	Normal	-2.4659	GTEX-14BIM-0011-R5b-SM-5S2RM
GBM(T=153,N=1157)	Normal	-3.3076	GTEX-ZF28-0011-R7a-SM-4WKF5
GBM(T=153,N=1157)	Normal	-9.9658	GTEX-RVPU-0011-R8A-SM-2TF74
GBM(T=153,N=1157)	Normal	-6.5064	GTEX-12ZZY-0011-R5a-SM-5EGL9
GBM(T=153,N=1157)	Normal	-9.9658	GTEX-RNOR-0011-R9A-SM-2TF52
GBM(T=153,N=1157)	Normal	-9.9658	GTEX-NPJ8-1526-SM-26GMH
GBM(T=153,N=1157)	Normal	-3.6259	GTEX-13VXU-0011-R6a-SM-5SI71
GBM(T=153,N=1157)	Normal	-5.5735	GTEX-NPJ8-1526-SM-26GMY
GBM(T=153,N=1157)	Normal	-9.9658	GTEX-12WSF-0011-R3a-SM-5DUW7
GBM(T=153,N=1157)	Normal	-5.0116	GTEX-12WSD-0011-R7b-SM-5PNWE
GBM(T=153,N=1157)	Normal	-5.5735	GTEX-14BIM-0011-R3b-SM-5S2RL
GBM(T=153,N=1157)	Normal	-5.0116	GTEX-13G51-0011-R1a-SM-5LZYR
GBM(T=153,N=1157)	Normal	-6.5064	GTEX-13FLW-0011-R1b-SM-5LZX2
GBM(T=153,N=1157)	Normal	-4.6082	GTEX-13OW6-0011-R11a-SM-5L3H2
GBM(T=153,N=1157)	Normal	-9.9658	GTEX-NPJ8-0011-R6a-SM-2HMKB
GBM(T=153,N=1157)	Normal	-9.9658	GTEX-11ZVC-0011-R1b-SM-5BC6M
GBM(T=153,N=1157)	Normal	-6.5064	GTEX-WWYW-3026-SM-3NB36
GBM(T=153,N=1157)	Normal	-6.5064	GTEX-QMR6-0011-R8A-SM-32PKJ
GBM(T=153,N=1157)	Normal	-3.6259	GTEX-13RTJ-0011-R9a-SM-5Q5AY
GBM(T=153,N=1157)	Normal	-4.035	GTEX-13NYS-0011-R1b-SM-5MR55
GBM(T=153,N=1157)	Normal	-6.5064	GTEX-OHPN-0011-R8A-SM-33HBT
GBM(T=153,N=1157)	Normal	-6.5064	GTEX-13O3Q-0011-R2b-SM-5KM3K
GBM(T=153,N=1157)	Normal	-2.8262	GTEX-13X6K-0011-R6a-SM-5P9K6
GBM(T=153,N=1157)	Normal	-4.6082	GTEX-Y8DK-0011-R1A-SM-4RGLO
GBM(T=153,N=1157)	Normal	-4.2934	GTEX-131YS-0011-R11b-SM-5EGLM
GBM(T=153,N=1157)	Normal	-3.6259	GTEX-X4XX-3026-SM-3NMB2
GBM(T=153,N=1157)	Normal	-9.9658	GTEX-11ONC-3026-SM-5985W
GBM(T=153,N=1157)	Normal	0.9343	GTEX-13NZA-0011-R9b-SM-5MR5I
GBM(T=153,N=1157)	Normal	-5.0116	GTEX-ZVZQ-0011-R3a-SM-57WC7
GBM(T=153,N=1157)	Normal	-9.9658	GTEX-14BIN-0011-R9a-SM-5SI76
GBM(T=153,N=1157)	Normal	-5.0116	GTEX-139TT-0011-R7b-SM-5J2MN
GBM(T=153,N=1157)	Normal	-9.9658	GTEX-11OF3-0011-R11a-SM-57WCR
GBM(T=153,N=1157)	Normal	-4.035	GTEX-145MF-2726-SM-5O995
GBM(T=153,N=1157)	Normal	-3.6259	GTEX-13G51-0011-R11b-SM-5J2NE
GBM(T=153,N=1157)	Normal	-9.9658	GTEX-13O3Q-0011-R5b-SM-5P9H4
GBM(T=153,N=1157)	Normal	-9.9658	GTEX-X4XY-0011-R10B-SM-46MWS
GBM(T=153,N=1157)	Normal	-6.5064	GTEX-1313W-3126-SM-5LZUI
GBM(T=153,N=1157)	Normal	-4.6082	GTEX-13FXS-0011-R11a-SM-5L3DM
GBM(T=153,N=1157)	Normal	-4.6082	GTEX-13FHO-0011-R5b-SM-5LZZ3
GBM(T=153,N=1157)	Normal	-5.0116	GTEX-1445S-0011-R7b-SM-5PNUG
GBM(T=153,N=1157)	Normal	-9.9658	GTEX-RU72-0011-R6A-SM-2TF71
GBM(T=153,N=1157)	Normal	-9.9658	GTEX-UTHO-0011-R10A-SM-3GIJQ
GBM(T=153,N=1157)	Normal	-9.9658	GTEX-145MH-0011-R8a-SM-5PNUL
GBM(T=153,N=1157)	Normal	-3.6259	GTEX-NPJ8-0011-R4a-SM-2HML3
GBM(T=153,N=1157)	Normal	-3.816	GTEX-ZYY3-3126-SM-5SI9L
GBM(T=153,N=1157)	Normal	-3.458	GTEX-139TT-0011-R11b-SM-5LZV1
GBM(T=153,N=1157)	Normal	-9.9658	GTEX-145LU-0011-R11b-SM-5P9JX
GBM(T=153,N=1157)	Normal	-4.035	GTEX-13OW7-2926-SM-5MR3Z
GBM(T=153,N=1157)	Normal	-9.9658	GTEX-12WSA-2926-SM-5EQ4D
GBM(T=153,N=1157)	Normal	-3.3076	GTEX-12WSD-0011-R4b-SM-5LZUA
GBM(T=153,N=1157)	Normal	-4.6082	GTEX-13S7M-0011-R9a-SM-5O9DW
GBM(T=153,N=1157)	Normal	-5.0116	GTEX-14ASI-0011-R6a-SM-5S2UZ
GBM(T=153,N=1157)	Normal	-9.9658	GTEX-13OVL-0011-R5b-SM-5L3FU
GBM(T=153,N=1157)	Normal	-9.9658	GTEX-1313W-0011-R7b-SM-5DUWL
GBM(T=153,N=1157)	Normal	-5.5735	GTEX-144GL-0011-R6a-SM-5P9HW
GBM(T=153,N=1157)	Normal	-9.9658	GTEX-R55F-1326-SM-2TF5F
GBM(T=153,N=1157)	Normal	-9.9658	GTEX-1477Z-0011-R3b-SM-5PNX9
GBM(T=153,N=1157)	Normal	-2.5479	GTEX-13X6I-0011-R8a-SM-5PNZF
GBM(T=153,N=1157)	Normal	-5.5735	GTEX-12ZZX-2826-SM-5BC6K
GBM(T=153,N=1157)	Normal	-2.3884	TCGA-06-0680-11
GBM(T=153,N=1157)	Normal	-3.816	GTEX-13X6J-0011-R5b-SM-5PNWT
GBM(T=153,N=1157)	Normal	-5.5735	GTEX-NPJ8-0011-R1a-SM-5SI8B
GBM(T=153,N=1157)	Normal	-9.9658	GTEX-XLM4-0011-R8A-SM-4AT44
GBM(T=153,N=1157)	Normal	-2.1779	GTEX-139UW-0011-R9b-SM-5LZYT
GBM(T=153,N=1157)	Normal	-4.2934	GTEX-13RTJ-0011-R1a-SM-5O9D9
GBM(T=153,N=1157)	Normal	-4.2934	GTEX-ZUA1-0011-R5b-SM-51MTG
GBM(T=153,N=1157)	Normal	-9.9658	GTEX-11ZUS-2926-SM-5FQSL
GBM(T=153,N=1157)	Normal	-5.5735	GTEX-117XS-3026-SM-5N9CA
GBM(T=153,N=1157)	Normal	-5.0116	GTEX-13NYS-0011-R5a-SM-5MR4D
GBM(T=153,N=1157)	Normal	-1.9379	GTEX-13OVJ-2726-SM-5IJG6
GBM(T=153,N=1157)	Normal	-9.9658	GTEX-Z93S-0011-R5b-SM-4RGNI
GBM(T=153,N=1157)	Normal	-9.9658	GTEX-QDT8-3026-SM-32PKB
GBM(T=153,N=1157)	Normal	-5.0116	GTEX-NPJ8-0011-R3a-SM-2HMIW
GBM(T=153,N=1157)	Normal	-9.9658	GTEX-13OVH-0011-R4a-SM-5KM3W
GBM(T=153,N=1157)	Normal	-3.458	GTEX-11ONC-2926-SM-5P9JM
GBM(T=153,N=1157)	Normal	-5.5735	GTEX-WWYW-0011-R7A-SM-3NB3H
GBM(T=153,N=1157)	Normal	-5.5735	GTEX-RNOR-2226-SM-2TF5O
GBM(T=153,N=1157)	Normal	-3.0469	GTEX-WHSE-0011-R3A-SM-3P5ZM
GBM(T=153,N=1157)	Normal	-9.9658	GTEX-131XH-0011-R6a-SM-5KM2G
GBM(T=153,N=1157)	Normal	-2.6349	GTEX-12WS9-0011-R10a-SM-57WBV
GBM(T=153,N=1157)	Normal	-3.0469	GTEX-131YS-0011-R10b-SM-5EQ5N
GBM(T=153,N=1157)	Normal	-5.0116	GTEX-13VXU-0011-R3b-SM-5O9CU
GBM(T=153,N=1157)	Normal	-6.5064	GTEX-OXRO-0011-R9A-SM-5S2W3
GBM(T=153,N=1157)	Normal	-4.6082	GTEX-13X6J-0011-R3b-SM-5P9K5
GBM(T=153,N=1157)	Normal	-1.2142	GTEX-11ONC-0011-R8b-SM-5NQ87
GBM(T=153,N=1157)	Normal	-1.9942	GTEX-12126-0011-R11a-SM-5BC6X
GBM(T=153,N=1157)	Normal	-9.9658	GTEX-RU72-0011-R7A-SM-2TF5U
GBM(T=153,N=1157)	Normal	-4.2934	GTEX-11H98-0011-R11b-SM-5NQ6U
GBM(T=153,N=1157)	Normal	-9.9658	GTEX-WZTO-0011-R11A-SM-4E3K9
GBM(T=153,N=1157)	Normal	-4.6082	GTEX-14BIM-3126-SM-5Q5C7
GBM(T=153,N=1157)	Normal	-4.2934	GTEX-ZAB4-0011-R3a-SM-4RGNQ
GBM(T=153,N=1157)	Normal	-9.9658	GTEX-13OVL-0011-R8a-SM-5L3HH
GBM(T=153,N=1157)	Normal	-3.1714	GTEX-14ABY-0011-R9a-SM-5PNZK
GBM(T=153,N=1157)	Normal	-4.2934	GTEX-NL4W-0011-R8a-SM-2I3G4
GBM(T=153,N=1157)	Normal	-9.9658	GTEX-11GSO-0011-R2a-SM-57WDF
GBM(T=153,N=1157)	Normal	-6.5064	GTEX-NL3H-0011-R1a-SM-48TDJ
GBM(T=153,N=1157)	Normal	-9.9658	GTEX-X261-0011-R10B-SM-4E3JT
GBM(T=153,N=1157)	Normal	-9.9658	GTEX-11ZTS-0011-R3a-SM-5BC78
GBM(T=153,N=1157)	Normal	-3.816	GTEX-XLM4-0011-R6A-SM-4AT4B
GBM(T=153,N=1157)	Normal	-3.1714	GTEX-12WSB-0011-R11b-SM-57WBJ
GBM(T=153,N=1157)	Normal	-3.1714	GTEX-N7MT-0011-R6a-SM-2I3G3
GBM(T=153,N=1157)	Normal	-9.9658	GTEX-T5JC-2326-SM-32PMR
GBM(T=153,N=1157)	Normal	-5.0116	GTEX-145MH-0011-R5a-SM-5P9JT
GBM(T=153,N=1157)	Normal	-9.9658	GTEX-13NZ8-3026-SM-5L3D4
GBM(T=153,N=1157)	Normal	-4.6082	GTEX-13OVH-3026-SM-5MR4N
GBM(T=153,N=1157)	Normal	-9.9658	GTEX-YJ89-0011-R11a-SM-4SOKA
GBM(T=153,N=1157)	Normal	-3.0469	GTEX-13N1W-0011-R10b-SM-5MR4H
GBM(T=153,N=1157)	Normal	-1.8836	GTEX-145MI-3126-SM-5Q5CF
GBM(T=153,N=1157)	Normal	-9.9658	GTEX-13OW8-0011-R10a-SM-5L3H6
GBM(T=153,N=1157)	Normal	-3.6259	GTEX-13OW8-0011-R8a-SM-5L3G5
GBM(T=153,N=1157)	Normal	-3.816	GTEX-QVUS-0011-R8A-SM-3GAD7
GBM(T=153,N=1157)	Normal	-2.4659	GTEX-P44H-0011-R4A-SM-2XCEW
GBM(T=153,N=1157)	Normal	-9.9658	GTEX-RU72-0011-R2A-SM-2TF6O
GBM(T=153,N=1157)	Normal	-3.0469	GTEX-X585-0011-R8A-SM-46MUX
GBM(T=153,N=1157)	Normal	-3.3076	GTEX-145MH-0011-R3b-SM-5P9JQ
GBM(T=153,N=1157)	Normal	-9.9658	GTEX-11ZUS-0011-R8a-SM-5BC73
GBM(T=153,N=1157)	Normal	-1.3548	GTEX-NPJ8-2626-SM-2D7W2
GBM(T=153,N=1157)	Normal	-4.2934	GTEX-YFC4-0011-R4a-SM-4RGLQ
GBM(T=153,N=1157)	Normal	-0.4921	GTEX-13NZA-0011-R8b-SM-5KM2Q
GBM(T=153,N=1157)	Normal	-2.7274	GTEX-Y8DK-0011-R5B-SM-4RTW6
GBM(T=153,N=1157)	Normal	-9.9658	GTEX-11ZTS-0011-R1a-SM-5BC71
GBM(T=153,N=1157)	Normal	-5.0116	GTEX-YJ89-0011-R9a-SM-4SOK7
GBM(T=153,N=1157)	Normal	-5.0116	GTEX-139TU-0011-R5b-SM-5L3E1
GBM(T=153,N=1157)	Normal	-9.9658	GTEX-NL3H-0011-R11A-SM-2I3E6
GBM(T=153,N=1157)	Normal	-3.816	GTEX-N7MS-0011-R2a-SM-2HML6
GBM(T=153,N=1157)	Normal	-9.9658	GTEX-13FTY-0011-R1a-SM-5LZXE
GBM(T=153,N=1157)	Normal	-9.9658	GTEX-12WSF-0011-R4b-SM-5HL88
GBM(T=153,N=1157)	Normal	-2.7274	GTEX-11ZTS-0011-R2b-SM-5BC75
GBM(T=153,N=1157)	Normal	-5.5735	GTEX-T5JC-0011-R11A-SM-32PMB
GBM(T=153,N=1157)	Normal	-4.2934	GTEX-1399T-3026-SM-5KLZC
GBM(T=153,N=1157)	Normal	-9.9658	GTEX-12WS9-0011-R2a-SM-5CVNE
GBM(T=153,N=1157)	Normal	-9.9658	GTEX-139T8-0011-R1a-SM-5HL75
GBM(T=153,N=1157)	Normal	-3.458	GTEX-X4XX-0011-R4B-SM-46MWL
GBM(T=153,N=1157)	Normal	-5.0116	GTEX-NPJ8-2626-SM-26GMZ
GBM(T=153,N=1157)	Normal	-4.2934	GTEX-T5JC-2426-SM-3NMDB
GBM(T=153,N=1157)	Normal	-5.5735	GTEX-11ZUS-0011-R11b-SM-5BC7B
GBM(T=153,N=1157)	Normal	-9.9658	GTEX-13RTJ-3126-SM-5S2Q4
GBM(T=153,N=1157)	Normal	-1.7809	GTEX-13CZV-0011-R9a-SM-5LZXT
GBM(T=153,N=1157)	Normal	-6.5064	GTEX-13CZV-0011-R5a-SM-5K7XA
GBM(T=153,N=1157)	Normal	-3.1714	GTEX-13OW6-0011-R5a-SM-5O9BK
GBM(T=153,N=1157)	Normal	-9.9658	GTEX-12WSM-0011-R6b-SM-5EQ6N
GBM(T=153,N=1157)	Normal	-1.5105	GTEX-13N1W-0011-R5b-SM-5MR5Q
GBM(T=153,N=1157)	Normal	-5.5735	GTEX-ZZPT-3026-SM-5GZXH
GBM(T=153,N=1157)	Normal	-6.5064	GTEX-12ZZY-0011-R6b-SM-5EGLA
GBM(T=153,N=1157)	Normal	-6.5064	GTEX-145MI-0011-R4b-SM-5PNZH
GBM(T=153,N=1157)	Normal	-6.5064	GTEX-13QIC-0011-R11b-SM-5O9BU
GBM(T=153,N=1157)	Normal	-4.2934	GTEX-WVLH-0011-R1A-SM-4MVOK
GBM(T=153,N=1157)	Normal	-1.8836	GTEX-13OVJ-0011-R5a-SM-5P9H7
GBM(T=153,N=1157)	Normal	-4.2934	GTEX-11GSP-3226-SM-5986O
GBM(T=153,N=1157)	Normal	-5.5735	GTEX-13NYS-0011-R8a-SM-5MR5H
GBM(T=153,N=1157)	Normal	-9.9658	GTEX-13OW6-3026-SM-5J2MI
GBM(T=153,N=1157)	Normal	-2.9324	GTEX-ZE7O-0011-R7a-SM-57WCU
GBM(T=153,N=1157)	Normal	-5.0116	GTEX-ZUA1-0011-R3a-SM-4YCEE
GBM(T=153,N=1157)	Normal	-2.5479	GTEX-XMD1-0011-R6A-SM-4AT5K
GBM(T=153,N=1157)	Normal	-4.2934	GTEX-13X6K-0011-R10a-SM-5P9JR
GBM(T=153,N=1157)	Normal	-5.5735	GTEX-ZF28-0011-R1a-SM-4WWD1
GBM(T=153,N=1157)	Normal	-3.6259	GTEX-ZF28-0011-R6a-SM-4WKHI
GBM(T=153,N=1157)	Normal	-2.8262	GTEX-131XH-0011-R2b-SM-5DUVY
GBM(T=153,N=1157)	Normal	-4.6082	GTEX-13RTJ-0011-R11a-SM-5O9CK
GBM(T=153,N=1157)	Normal	-4.2934	GTEX-13OW5-0011-R4b-SM-5L3HS
GBM(T=153,N=1157)	Normal	-9.9658	GTEX-RVPV-0011-R5A-SM-2TF69
GBM(T=153,N=1157)	Normal	-5.5735	GTEX-12WSF-0011-R7b-SM-5HL99
GBM(T=153,N=1157)	Normal	-5.0116	GTEX-WZTO-0011-R1B-SM-3NMAR
GBM(T=153,N=1157)	Normal	-2.3884	GTEX-WL46-0011-R1A-SM-3LK6M
GBM(T=153,N=1157)	Normal	-5.5735	GTEX-UTHO-2926-SM-3P5Z9
GBM(T=153,N=1157)	Normal	-9.9658	GTEX-12WSE-0011-R1b-SM-5GU4V
GBM(T=153,N=1157)	Normal	-6.5064	GTEX-ZE9C-0011-R6a-SM-4WWCW
GBM(T=153,N=1157)	Normal	-4.035	GTEX-144GL-0011-R1a-SM-5PNZ5
GBM(T=153,N=1157)	Normal	-3.0469	GTEX-13O3Q-0011-R8b-SM-5KM2J
GBM(T=153,N=1157)	Normal	-3.3076	GTEX-PWO3-0011-R2A-SM-2S1OX
GBM(T=153,N=1157)	Normal	-9.9658	GTEX-12ZZY-2926-SM-5DUXO
GBM(T=153,N=1157)	Normal	-9.9658	GTEX-11OF3-3126-SM-5GU5E
GBM(T=153,N=1157)	Normal	-2.0529	GTEX-Z93S-0011-R6b-SM-4RGNJ
GBM(T=153,N=1157)	Normal	-4.2934	GTEX-139UC-0011-R11a-SM-5KM3J
GBM(T=153,N=1157)	Normal	-2.0529	GTEX-13G51-0011-R2b-SM-5LZXS
GBM(T=153,N=1157)	Normal	-3.6259	GTEX-YJ89-0011-R6a-SM-4V6GN
GBM(T=153,N=1157)	Normal	-9.9658	GTEX-ZDXO-0011-R11a-SM-4WWD9
GBM(T=153,N=1157)	Normal	-9.9658	GTEX-14BIL-0011-R9a-SM-5SI7A
GBM(T=153,N=1157)	Normal	-5.5735	GTEX-Z93S-0011-R2a-SM-4RGNG
GBM(T=153,N=1157)	Normal	-6.5064	GTEX-12ZZZ-0011-R5a-SM-5EQ4M
GBM(T=153,N=1157)	Normal	-6.5064	GTEX-13OW8-0011-R7a-SM-5L3FP
GBM(T=153,N=1157)	Normal	-9.9658	GTEX-13FHP-0011-R6b-SM-5LZY6
GBM(T=153,N=1157)	Normal	-9.9658	GTEX-13S7M-0011-R11b-SM-5P9HU
GBM(T=153,N=1157)	Normal	-3.816	GTEX-TSE9-3026-SM-3DB76
GBM(T=153,N=1157)	Normal	-6.5064	GTEX-12WSC-3026-SM-5GCNF
GBM(T=153,N=1157)	Normal	-2.9324	GTEX-QVUS-0011-R4A-SM-3GAE7
GBM(T=153,N=1157)	Normal	-9.9658	GTEX-11UD1-0011-R5b-SM-5P9FP
GBM(T=153,N=1157)	Normal	-6.5064	GTEX-13FLW-1426-SM-5K7YE
GBM(T=153,N=1157)	Normal	-2.3147	GTEX-13JVG-0011-R7b-SM-5MR3Q
GBM(T=153,N=1157)	Normal	-9.9658	GTEX-145MH-0011-R7a-SM-5PNWH
GBM(T=153,N=1157)	Normal	-5.5735	GTEX-139TS-0011-R7a-SM-5K7X7
GBM(T=153,N=1157)	Normal	-3.0469	GTEX-ZVZQ-0011-R1a-SM-57WBU
GBM(T=153,N=1157)	Normal	-6.5064	GTEX-QMR6-0011-R10A-SM-32PKO
GBM(T=153,N=1157)	Normal	-9.9658	GTEX-WL46-0011-R11A-SM-3MJFT
GBM(T=153,N=1157)	Normal	-5.5735	GTEX-12WSD-0011-R6b-SM-5P9JU
GBM(T=153,N=1157)	Normal	-5.5735	GTEX-13X6J-0011-R4b-SM-5P9K4
GBM(T=153,N=1157)	Normal	-9.9658	GTEX-11GSP-0011-R11b-SM-5NQ7V
GBM(T=153,N=1157)	Normal	0.9419	GTEX-X4EP-0011-R4B-SM-3P627
GBM(T=153,N=1157)	Normal	-2.7274	GTEX-WVLH-0011-R10A-SM-3MJFM
GBM(T=153,N=1157)	Normal	-4.2934	GTEX-Q2AG-0011-R1A-SM-2HMJI
GBM(T=153,N=1157)	Normal	-3.3076	GTEX-X261-3126-SM-4PQZC
GBM(T=153,N=1157)	Normal	-5.0116	GTEX-Z93S-2926-SM-57WB9
GBM(T=153,N=1157)	Normal	-4.035	GTEX-13OVJ-0011-R6b-SM-5L3GH
GBM(T=153,N=1157)	Normal	-5.5735	GTEX-13IVO-0011-R10a-SM-5LZY3
GBM(T=153,N=1157)	Normal	-9.9658	GTEX-11DZ1-2926-SM-5A5KI
GBM(T=153,N=1157)	Normal	-4.6082	GTEX-13X6I-0011-R7b-SM-5PNWP
GBM(T=153,N=1157)	Normal	-3.0469	GTEX-RVPU-0011-R9A-SM-3NM8E
GBM(T=153,N=1157)	Normal	-1.7809	GTEX-13NZA-0011-R1b-SM-5LUAF
GBM(T=153,N=1157)	Normal	-9.9658	GTEX-13NZA-0011-R5b-SM-5KM4K
GBM(T=153,N=1157)	Normal	-9.9658	GTEX-13OVH-2926-SM-5IJFH
GBM(T=153,N=1157)	Normal	-3.816	GTEX-P44H-0011-R1A-SM-3NM8J
GBM(T=153,N=1157)	Normal	-9.9658	GTEX-13CIG-0011-R5b-SM-5L3F2
GBM(T=153,N=1157)	Normal	-9.9658	GTEX-13OW5-0011-R11b-SM-5L3GG
GBM(T=153,N=1157)	Normal	-3.458	GTEX-13JVG-0011-R6a-SM-5MR3E
GBM(T=153,N=1157)	Normal	-9.9658	GTEX-11ZU8-0011-R3a-SM-5BC6U
GBM(T=153,N=1157)	Normal	-5.0116	GTEX-132Q8-0011-R2b-SM-5EQ5Z
GBM(T=153,N=1157)	Normal	-3.458	GTEX-YFC4-3026-SM-5IFJK
GBM(T=153,N=1157)	Normal	-9.9658	GTEX-145MH-2926-SM-5Q5D2
GBM(T=153,N=1157)	Normal	-4.6082	GTEX-13JUV-0011-R6b-SM-5LZYG
GBM(T=153,N=1157)	Normal	-6.5064	GTEX-T6MN-0011-R5A-SM-32QPD
GBM(T=153,N=1157)	Normal	-9.9658	GTEX-139TT-0011-R3b-SM-5K7VL
GBM(T=153,N=1157)	Normal	-9.9658	GTEX-13CF2-0011-R11b-SM-5LZXO
GBM(T=153,N=1157)	Normal	-9.9658	GTEX-144GL-3026-SM-5Q5CW
GBM(T=153,N=1157)	Normal	-1.1172	GTEX-QDT8-2926-SM-32PKC
GBM(T=153,N=1157)	Normal	-9.9658	GTEX-11NV4-0011-R7a-SM-57WDH
GBM(T=153,N=1157)	Normal	-9.9658	GTEX-14ASI-0011-R1b-SM-5S2TY
GBM(T=153,N=1157)	Normal	-5.5735	GTEX-ZAB4-0011-R11a-SM-4SOKI
GBM(T=153,N=1157)	Normal	-4.035	GTEX-WZTO-2826-SM-3NM8P
GBM(T=153,N=1157)	Normal	-6.5064	GTEX-XLM4-0011-R2B-SM-4AT5Z
GBM(T=153,N=1157)	Normal	-0.5973	GTEX-QDT8-0011-R9A-SM-32PKH
GBM(T=153,N=1157)	Normal	-4.2934	GTEX-ZYFD-2926-SM-5GID9
GBM(T=153,N=1157)	Normal	-9.9658	GTEX-X585-0011-R4B-SM-46MVH
GBM(T=153,N=1157)	Normal	-9.9658	GTEX-QMR6-0011-R6A-SM-32PKP
GBM(T=153,N=1157)	Normal	-6.5064	GTEX-13112-0011-R1b-SM-5HL7K
GBM(T=153,N=1157)	Normal	-5.0116	GTEX-Z93S-0011-R3b-SM-4RGNH
GBM(T=153,N=1157)	Normal	-3.0469	GTEX-T5JC-0011-R10A-SM-32PM2
GBM(T=153,N=1157)	Normal	-3.816	GTEX-X585-0011-R2B-SM-46MVF
GBM(T=153,N=1157)	Normal	-5.0116	GTEX-WL46-0011-R3A-SM-3TW8E
GBM(T=153,N=1157)	Normal	-3.6259	GTEX-13X6I-0011-R1b-SM-5PNZC
GBM(T=153,N=1157)	Normal	-5.5735	GTEX-R55E-0011-R5A-SM-2TC5N
GBM(T=153,N=1157)	Normal	-6.5064	GTEX-WVLH-3026-SM-3MJG9
GBM(T=153,N=1157)	Normal	-6.5064	GTEX-13OW5-0011-R5b-SM-5L3FR
GBM(T=153,N=1157)	Normal	-9.9658	GTEX-Y8DK-0826-SM-4TT3T
GBM(T=153,N=1157)	Normal	-4.035	GTEX-ZUA1-0011-R11b-SM-51MTI
GBM(T=153,N=1157)	Normal	-3.1714	GTEX-13CF2-0011-R1a-SM-5LZY1
GBM(T=153,N=1157)	Normal	-5.5735	GTEX-12WSH-3126-SM-5LZW8
GBM(T=153,N=1157)	Normal	-9.9658	GTEX-12696-3026-SM-5FQTU
GBM(T=153,N=1157)	Normal	-9.9658	GTEX-WL46-0011-R6A-SM-3LK6X
GBM(T=153,N=1157)	Normal	1.125	GTEX-139UC-0011-R9a-SM-5K7W7
GBM(T=153,N=1157)	Normal	-9.9658	GTEX-N7MS-0011-R10A-SM-2HMJK
GBM(T=153,N=1157)	Normal	-9.9658	GTEX-13SLX-0011-R11b-SM-5O9C8
GBM(T=153,N=1157)	Normal	-9.9658	GTEX-147GR-0011-R2b-SM-5S2RQ
GBM(T=153,N=1157)	Normal	-5.0116	GTEX-145MG-3026-SM-5RQJA
GBM(T=153,N=1157)	Normal	-9.9658	GTEX-13O3O-0011-R11b-SM-5KM4G
GBM(T=153,N=1157)	Normal	-4.2934	GTEX-YFC4-0011-R5a-SM-4RGLR
GBM(T=153,N=1157)	Normal	-2.4659	GTEX-13PVQ-0011-R9b-SM-5LU3B
GBM(T=153,N=1157)	Normal	-9.9658	GTEX-12WSD-0011-R2a-SM-5LZWB
GBM(T=153,N=1157)	Normal	-5.0116	GTEX-12WSB-0011-R1b-SM-5P9EY
GBM(T=153,N=1157)	Normal	-3.1714	GTEX-12ZZW-0011-R4a-SM-5DUX9
GBM(T=153,N=1157)	Normal	-3.0469	GTEX-ZE7O-0011-R5a-SM-57WBO
GBM(T=153,N=1157)	Normal	-3.3076	GTEX-WZTO-0011-R3B-SM-3NMC6
GBM(T=153,N=1157)	Normal	-6.5064	GTEX-13VXU-0011-R4b-SM-5O9CI
GBM(T=153,N=1157)	Normal	-9.9658	GTEX-11EQ8-2826-SM-5N9C1
GBM(T=153,N=1157)	Normal	-9.9658	GTEX-QVUS-2926-SM-3GIJB
GBM(T=153,N=1157)	Normal	-9.9658	GTEX-P44H-0011-R3A-SM-2XCEQ
GBM(T=153,N=1157)	Normal	-4.2934	GTEX-WVLH-0011-R4A-SM-3MJFS
GBM(T=153,N=1157)	Normal	-4.2934	GTEX-XOTO-3026-SM-4B65M
GBM(T=153,N=1157)	Normal	-4.6082	GTEX-13SLW-0011-R3b-SM-5SI6Y
GBM(T=153,N=1157)	Normal	-3.3076	GTEX-13JVG-0011-R5a-SM-5MR4O
GBM(T=153,N=1157)	Normal	-5.0116	GTEX-111FC-3126-SM-5GZZ2
GBM(T=153,N=1157)	Normal	-9.9658	GTEX-1117F-3226-SM-5N9CT
GBM(T=153,N=1157)	Normal	-9.9658	GTEX-13JUV-0011-R7b-SM-5LZZG
GBM(T=153,N=1157)	Normal	-9.9658	GTEX-145MI-0011-R5a-SM-5Q5B4
GBM(T=153,N=1157)	Normal	-3.816	GTEX-13JVG-3226-SM-5IJGJ
GBM(T=153,N=1157)	Normal	-4.2934	GTEX-WHSE-0011-R11A-SM-3P5YY
GBM(T=153,N=1157)	Normal	-1.9379	GTEX-13JVG-0011-R8a-SM-5KM3E
GBM(T=153,N=1157)	Normal	-3.0469	GTEX-QDT8-0011-R9A-SM-5SI8J
GBM(T=153,N=1157)	Normal	-2.6349	GTEX-13OW5-0011-R6b-SM-5O9BW
GBM(T=153,N=1157)	Normal	-3.3076	GTEX-OXRO-0011-R9A-SM-3NB1X
GBM(T=153,N=1157)	Normal	-4.6082	GTEX-RNOR-2326-SM-2TF4I
GBM(T=153,N=1157)	Normal	-9.9658	GTEX-WL46-2826-SM-3LK81
GBM(T=153,N=1157)	Normal	-5.5735	GTEX-YJ89-0011-R1a-SM-4RGLS
GBM(T=153,N=1157)	Normal	-4.2934	GTEX-13NYB-0011-R6b-SM-5MR51
GBM(T=153,N=1157)	Normal	-2.0529	GTEX-11WQK-0011-R8a-SM-5BC7C
GBM(T=153,N=1157)	Normal	-5.5735	GTEX-WL46-0011-R2A-SM-3LK6O
GBM(T=153,N=1157)	Normal	-2.7274	GTEX-RU72-0011-R8A-SM-2TF61
GBM(T=153,N=1157)	Normal	-3.6259	GTEX-13N2G-0011-R11a-SM-5MR3F
GBM(T=153,N=1157)	Normal	-9.9658	GTEX-ZVZQ-0011-R6b-SM-57WAY
GBM(T=153,N=1157)	Normal	-9.9658	GTEX-ZVT3-0011-R5a-SM-51MSI
GBM(T=153,N=1157)	Normal	-9.9658	GTEX-12ZZZ-3126-SM-5LZU6
GBM(T=153,N=1157)	Normal	-9.9658	GTEX-RVPU-0011-R4A-SM-5SI8K
GBM(T=153,N=1157)	Normal	-3.0469	GTEX-13NZA-0011-R10b-SM-5KM54
GBM(T=153,N=1157)	Normal	-0.2845	GTEX-XMD1-0011-R5A-SM-4AT47
GBM(T=153,N=1157)	Normal	-9.9658	GTEX-14ABY-0011-R6a-SM-5PNWR
GBM(T=153,N=1157)	Normal	-2.1779	GTEX-WWYW-0011-R10A-SM-3NB35
GBM(T=153,N=1157)	Normal	-2.0529	GTEX-T6MN-0011-R2A-SM-32QOW
GBM(T=153,N=1157)	Normal	-9.9658	GTEX-NL4W-0011-R11A-SM-2I3DW
GBM(T=153,N=1157)	Normal	-9.9658	GTEX-1313W-0011-R3a-SM-5EGLI
GBM(T=153,N=1157)	Normal	-4.6082	GTEX-13VXU-0011-R5a-SM-5O9D7
GBM(T=153,N=1157)	Normal	-5.5735	GTEX-12WSD-0011-R1b-SM-5LZVY
GBM(T=153,N=1157)	Normal	-4.035	GTEX-P44H-0011-R3A-SM-5SI8A
GBM(T=153,N=1157)	Normal	-1.4305	GTEX-TSE9-0011-R10A-SM-3DB7O
GBM(T=153,N=1157)	Normal	-6.5064	GTEX-1445S-0011-R6b-SM-5PNUF
GBM(T=153,N=1157)	Normal	-2.7274	GTEX-ZV68-0011-R2a-SM-4YCDK
GBM(T=153,N=1157)	Normal	-3.0469	GTEX-XLM4-0011-R9A-SM-4AT45
GBM(T=153,N=1157)	Normal	-5.5735	GTEX-13JUV-0011-R11a-SM-5LZYH
GBM(T=153,N=1157)	Normal	-4.035	GTEX-S7PM-0011-R5A-SM-3NM8G
GBM(T=153,N=1157)	Normal	-4.6082	GTEX-13FXS-0011-R1a-SM-5K7U6
GBM(T=153,N=1157)	Normal	-9.9658	GTEX-144GL-0011-R11b-SM-5P9F6
GBM(T=153,N=1157)	Normal	-1.0262	GTEX-X4XX-0011-R5A-SM-46MWN
GBM(T=153,N=1157)	Normal	-1.6394	GTEX-145LU-0011-R9b-SM-5SI66
GBM(T=153,N=1157)	Normal	-9.9658	GTEX-13OW6-0011-R2a-SM-5L3HG
GBM(T=153,N=1157)	Normal	-9.9658	GTEX-14DAQ-3026-SM-5S2QZ
GBM(T=153,N=1157)	Normal	-1.9942	GTEX-13FHO-0011-R1b-SM-5KLZG
GBM(T=153,N=1157)	Normal	-1.5105	GTEX-13N1W-0011-R4a-SM-5MR52
GBM(T=153,N=1157)	Normal	0.0854	GTEX-X4EP-0011-R1A-SM-3P624
GBM(T=153,N=1157)	Normal	-9.9658	GTEX-12WS9-0011-R4b-SM-5P9EU
GBM(T=153,N=1157)	Normal	-5.5735	GTEX-13RTJ-0011-R10b-SM-5O9CW
GBM(T=153,N=1157)	Normal	-9.9658	GTEX-13S7M-0011-R6b-SM-5O9D8
GBM(T=153,N=1157)	Normal	-9.9658	GTEX-13O3O-0011-R6b-SM-5P9GY
GBM(T=153,N=1157)	Normal	-9.9658	GTEX-12WSH-0011-R9b-SM-5LZUG
GBM(T=153,N=1157)	Normal	-4.2934	GTEX-12126-1026-SM-5P9JJ
GBM(T=153,N=1157)	Normal	-5.5735	GTEX-WWYW-3126-SM-3NB39
GBM(T=153,N=1157)	Normal	-9.9658	GTEX-13CF2-0011-R5a-SM-5LZWS
GBM(T=153,N=1157)	Normal	-6.5064	GTEX-13VXU-2926-SM-5LU5C
GBM(T=153,N=1157)	Normal	-9.9658	GTEX-ZAB4-0011-R8b-SM-4SOKF
GBM(T=153,N=1157)	Normal	-3.6259	GTEX-13NYB-3026-SM-5IJD7
GBM(T=153,N=1157)	Normal	-5.0116	GTEX-13CIG-0011-R8b-SM-5LZX5
GBM(T=153,N=1157)	Normal	-9.9658	GTEX-UTHO-0011-R5A-SM-3GIJD
GBM(T=153,N=1157)	Normal	-9.9658	GTEX-13O3O-0011-R8b-SM-5LUAL
GBM(T=153,N=1157)	Normal	-9.9658	GTEX-X4XX-0011-R3B-SM-46MWK
GBM(T=153,N=1157)	Normal	-9.9658	GTEX-NPJ7-0011-R2a-SM-2I3GF
GBM(T=153,N=1157)	Normal	-3.6259	GTEX-ZE9C-0011-R3a-SM-4WKGT
GBM(T=153,N=1157)	Normal	-9.9658	GTEX-13QJC-0011-R8b-SM-5S2U6
GBM(T=153,N=1157)	Normal	-4.2934	GTEX-12WS9-0011-R3a-SM-5CVNF
GBM(T=153,N=1157)	Normal	-3.816	GTEX-ZUA1-0011-R6b-SM-4YCDD
GBM(T=153,N=1157)	Normal	-4.2934	GTEX-13PVQ-0011-R7a-SM-5L3G3
GBM(T=153,N=1157)	Normal	-5.5735	GTEX-13NYS-0011-R3b-SM-5MR41
GBM(T=153,N=1157)	Normal	-3.816	GTEX-13X6K-0011-R7b-SM-5P9K7
GBM(T=153,N=1157)	Normal	-6.5064	GTEX-1399T-0011-R5b-SM-5IJDK
GBM(T=153,N=1157)	Normal	-4.2934	GTEX-145MH-3026-SM-5Q5DZ
GBM(T=153,N=1157)	Normal	-9.9658	GTEX-Y8DK-0011-R10A-SM-4SOK1
GBM(T=153,N=1157)	Normal	-9.9658	GTEX-13OW8-0011-R1a-SM-5L3HI
GBM(T=153,N=1157)	Normal	-6.5064	GTEX-14753-0011-R6b-SM-5S2UD
GBM(T=153,N=1157)	Normal	-3.3076	GTEX-13X6K-0011-R5b-SM-5PNUE
GBM(T=153,N=1157)	Normal	-9.9658	GTEX-NL3H-0011-R7a-SM-2I3G5
GBM(T=153,N=1157)	Normal	-5.0116	GTEX-ZDXO-0011-R5a-SM-4WKG5
GBM(T=153,N=1157)	Normal	0.9789	GTEX-X4EP-0011-R3A-SM-3P626
GBM(T=153,N=1157)	Normal	-2.0529	GTEX-13N2G-0011-R3b-SM-5MR5G
GBM(T=153,N=1157)	Normal	-4.2934	GTEX-T2IS-3026-SM-32QPM
GBM(T=153,N=1157)	Normal	-5.5735	GTEX-14BIN-0011-R6a-SM-5S2RH
GBM(T=153,N=1157)	Normal	-4.035	GTEX-13OVH-0011-R3a-SM-5KM49
GBM(T=153,N=1157)	Normal	-3.458	GTEX-P44G-0011-R4A-SM-2I3FB
GBM(T=153,N=1157)	Normal	-5.0116	GTEX-13PDP-0011-R6b-SM-5O9D5
GBM(T=153,N=1157)	Normal	-4.6082	GTEX-NPJ8-0011-R1a-SM-2HMLC
GBM(T=153,N=1157)	Normal	-9.9658	GTEX-N7MS-0011-R7a-SM-2HMKN
GBM(T=153,N=1157)	Normal	-9.9658	GTEX-13SLW-0011-R2b-SM-5O9C6
GBM(T=153,N=1157)	Normal	-9.9658	GTEX-ZAJG-3026-SM-5HL92
GBM(T=153,N=1157)	Normal	-2.114	GTEX-WHSE-0011-R5A-SM-3P5ZO
GBM(T=153,N=1157)	Normal	-4.6082	GTEX-11ZUS-0011-R9b-SM-5BC76
GBM(T=153,N=1157)	Normal	-9.9658	GTEX-RU72-2926-SM-2TF66
GBM(T=153,N=1157)	Normal	-9.9658	GTEX-Q2AG-0011-R6A-SM-2HML7
GBM(T=153,N=1157)	Normal	-4.2934	GTEX-11EI6-2926-SM-5985U
GBM(T=153,N=1157)	Normal	-9.9658	GTEX-R55F-0011-R5A-SM-2TF5L
GBM(T=153,N=1157)	Normal	-6.5064	GTEX-13FXS-0011-R10a-SM-5J2MA
GBM(T=153,N=1157)	Normal	-5.0116	GTEX-13O3Q-0011-R4a-SM-5P9H2
GBM(T=153,N=1157)	Normal	-4.6082	GTEX-132Q8-2926-SM-5IFFP
GBM(T=153,N=1157)	Normal	-9.9658	GTEX-NL3H-0011-R5a-SM-2I3GB
GBM(T=153,N=1157)	Normal	-9.9658	GTEX-1399T-0011-R11a-SM-5J2O1
GBM(T=153,N=1157)	Normal	-3.816	GTEX-ZAB4-2926-SM-57WCV
GBM(T=153,N=1157)	Normal	-2.1779	GTEX-13N1W-0011-R9b-SM-5MR4R
GBM(T=153,N=1157)	Normal	-9.9658	GTEX-13OVL-0011-R9a-SM-5P9GX
GBM(T=153,N=1157)	Normal	-4.6082	GTEX-13FXS-0011-R8a-SM-5J1MN
GBM(T=153,N=1157)	Normal	-0.3752	GTEX-ZAB4-0011-R9a-SM-4SOKG
GBM(T=153,N=1157)	Normal	-2.5479	GTEX-S7SE-0011-R2A-SM-2XCDC
GBM(T=153,N=1157)	Normal	-4.035	GTEX-139TT-0011-R1a-SM-5LZVD
GBM(T=153,N=1157)	Normal	-4.035	GTEX-12696-2926-SM-5FQTG
GBM(T=153,N=1157)	Normal	-2.4659	GTEX-N7MT-0011-R10A-SM-2I3E1
GBM(T=153,N=1157)	Normal	-6.5064	GTEX-13NYS-0011-R10a-SM-5MR4S
GBM(T=153,N=1157)	Normal	-4.2934	GTEX-11NV4-0011-R5a-SM-5NQ88
GBM(T=153,N=1157)	Normal	-9.9658	GTEX-13CF2-0011-R3b-SM-5LZZ6
GBM(T=153,N=1157)	Normal	-9.9658	GTEX-ZVZQ-0011-R4b-SM-57WCZ
GBM(T=153,N=1157)	Normal	-5.5735	GTEX-13RTJ-0011-R4b-SM-5PNX1
GBM(T=153,N=1157)	Normal	-9.9658	GTEX-13NYS-0011-R11b-SM-5MR4P
GBM(T=153,N=1157)	Normal	-2.5479	GTEX-T6MN-0011-R10A-SM-32QP7
GBM(T=153,N=1157)	Normal	-4.2934	GTEX-NPJ8-0011-R1a-SM-33HCB
GBM(T=153,N=1157)	Normal	-3.458	GTEX-13SLW-0011-R4b-SM-5S2W2
GBM(T=153,N=1157)	Normal	-3.3076	GTEX-PVOW-2526-SM-2XCF7
GBM(T=153,N=1157)	Normal	-2.8262	GTEX-OHPN-0011-R10A-SM-5S2U3
GBM(T=153,N=1157)	Normal	-4.2934	GTEX-13FHP-0011-R5b-SM-5LZY2
GBM(T=153,N=1157)	Normal	-3.816	GTEX-139T8-0011-R3b-SM-5HL4R
GBM(T=153,N=1157)	Normal	-2.7274	GTEX-ZE7O-0011-R11a-SM-57WBC
GBM(T=153,N=1157)	Normal	-3.3076	GTEX-N7MT-0011-R11A-SM-2I3DZ
GBM(T=153,N=1157)	Normal	-5.0116	GTEX-NL4W-0011-R5a-SM-2I3GD
GBM(T=153,N=1157)	Normal	-5.5735	GTEX-147GR-0011-R10b-SM-5S2UM
GBM(T=153,N=1157)	Normal	-4.2934	GTEX-ZVZQ-0011-R8a-SM-51MR5
GBM(T=153,N=1157)	Normal	-9.9658	GTEX-13CIG-0011-R3b-SM-5K7XF
GBM(T=153,N=1157)	Normal	-6.5064	GTEX-13SLX-0011-R5a-SM-5O9BV
GBM(T=153,N=1157)	Normal	-2.8262	GTEX-13PVQ-0011-R5b-SM-5O9DI
GBM(T=153,N=1157)	Normal	-9.9658	GTEX-RU72-0011-R11A-SM-5SI8G
GBM(T=153,N=1157)	Normal	-3.6259	GTEX-S7SE-0011-R6A-SM-2XCD9
GBM(T=153,N=1157)	Normal	-4.6082	GTEX-12WSA-0011-R4a-SM-57WB7
GBM(T=153,N=1157)	Normal	-9.9658	GTEX-12WSH-0011-R1a-SM-5GU5V
GBM(T=153,N=1157)	Normal	-2.1779	GTEX-145MI-0011-R11a-SM-5P9JZ
GBM(T=153,N=1157)	Normal	-0.394	GTEX-12WSF-0011-R5a-SM-5HL8K
GBM(T=153,N=1157)	Normal	-3.3076	GTEX-PVOW-0011-R3A-SM-32PKX
GBM(T=153,N=1157)	Normal	-6.5064	GTEX-145LS-3126-SM-5Q5BY
GBM(T=153,N=1157)	Normal	-5.5735	GTEX-QVJO-0011-R6A-SM-2S1QN
GBM(T=153,N=1157)	Normal	-0.6193	GTEX-145LS-0011-R8b-SM-5PNXA
GBM(T=153,N=1157)	Normal	-9.9658	GTEX-13OW8-2926-SM-5L3FV
GBM(T=153,N=1157)	Normal	-6.5064	GTEX-ZVT3-0011-R7a-SM-57WCO
GBM(T=153,N=1157)	Normal	-9.9658	GTEX-QMR6-0011-R4A-SM-32PKU
GBM(T=153,N=1157)	Normal	-1.685	GTEX-P44H-0011-R6A-SM-2XCF3
GBM(T=153,N=1157)	Normal	-2.9324	GTEX-P44G-0011-R7A-SM-2I3F9
GBM(T=153,N=1157)	Normal	-9.9658	GTEX-R55F-0011-R6A-SM-2TF4L
GBM(T=153,N=1157)	Normal	-9.9658	GTEX-YJ89-0011-R8b-SM-4SOK8
GBM(T=153,N=1157)	Normal	-3.3076	GTEX-TSE9-0011-R1A-SM-3DB7E
GBM(T=153,N=1157)	Normal	-6.5064	GTEX-12ZZW-0011-R6a-SM-5DUVZ
GBM(T=153,N=1157)	Normal	-9.9658	GTEX-N7MS-0011-R1a-SM-2HMJG
GBM(T=153,N=1157)	Normal	-4.6082	GTEX-Q2AG-0011-R3A-SM-2HMJ9
GBM(T=153,N=1157)	Normal	-9.9658	GTEX-T6MN-0011-R6A-SM-5CHQD
GBM(T=153,N=1157)	Normal	-5.5735	GTEX-12WSB-3026-SM-59HKM
GBM(T=153,N=1157)	Normal	-3.458	GTEX-Z93S-2826-SM-57WBL
GBM(T=153,N=1157)	Normal	-9.9658	GTEX-ZE9C-3026-SM-4WKHB
GBM(T=153,N=1157)	Normal	-9.9658	GTEX-ZF28-0011-R3a-SM-4WWDA
GBM(T=153,N=1157)	Normal	-2.2447	GTEX-13SLX-0011-R6a-SM-5PNX4
GBM(T=153,N=1157)	Normal	-2.0529	GTEX-13N1W-0011-R3a-SM-5MR5E
GBM(T=153,N=1157)	Normal	-4.2934	GTEX-XOTO-0011-R3A-SM-4B64W
GBM(T=153,N=1157)	Normal	-6.5064	GTEX-ZV68-0011-R10a-SM-51MT7
GBM(T=153,N=1157)	Normal	-4.2934	GTEX-13SLX-0011-R4a-SM-5O9BJ
GBM(T=153,N=1157)	Normal	-3.6259	GTEX-147F4-0011-R10b-SM-5S2WC
GBM(T=153,N=1157)	Normal	-9.9658	GTEX-WZTO-0011-R7B-SM-4E3IS
GBM(T=153,N=1157)	Normal	-2.5479	GTEX-WHSE-3026-SM-3P5ZH
GBM(T=153,N=1157)	Normal	-4.2934	GTEX-WZTO-0011-R10B-SM-4E3KB
GBM(T=153,N=1157)	Normal	-2.3147	GTEX-145MI-0011-R10a-SM-5PNZD
GBM(T=153,N=1157)	Normal	-2.8262	GTEX-13NYB-0011-R2a-SM-5MR3C
GBM(T=153,N=1157)	Normal	-5.0116	GTEX-ZUA1-0011-R1a-SM-4YCE2
GBM(T=153,N=1157)	Normal	-3.458	GTEX-12ZZZ-0011-R3b-SM-5DUXK
GBM(T=153,N=1157)	Normal	-5.5735	GTEX-13O3O-0011-R7b-SM-5P9GZ
GBM(T=153,N=1157)	Normal	-5.0116	GTEX-WVLH-0011-R8A-SM-3MJFC
GBM(T=153,N=1157)	Normal	-3.816	GTEX-131XH-0011-R4b-SM-5DUWB
GBM(T=153,N=1157)	Normal	-1.8836	GTEX-147GR-0011-R9a-SM-5S2UY
GBM(T=153,N=1157)	Normal	-6.5064	GTEX-13O3Q-3026-SM-5IJGD
GBM(T=153,N=1157)	Normal	-5.5735	GTEX-ZVT3-0011-R6a-SM-51MSU
GBM(T=153,N=1157)	Normal	-1.0262	GTEX-X4EP-0011-R8B-SM-4QASL
GBM(T=153,N=1157)	Normal	-9.9658	GTEX-YJ89-2926-SM-5P9IT
GBM(T=153,N=1157)	Normal	-4.6082	GTEX-ZAK1-2926-SM-5HL9S
GBM(T=153,N=1157)	Normal	-2.8262	GTEX-11TUW-3126-SM-5GU4Y
GBM(T=153,N=1157)	Normal	-2.1779	GTEX-XLM4-0011-R11A-SM-4AT46
GBM(T=153,N=1157)	Normal	-3.816	GTEX-T5JC-0011-R1A-SM-32PM6
GBM(T=153,N=1157)	Normal	-6.5064	GTEX-13QIC-0011-R4a-SM-5PNX8
GBM(T=153,N=1157)	Normal	-5.5735	GTEX-13CF2-0011-R2a-SM-5L3DC
GBM(T=153,N=1157)	Normal	-9.9658	GTEX-N7MS-0011-R5a-SM-2HMK8
GBM(T=153,N=1157)	Normal	-3.816	GTEX-ZDXO-0011-R2b-SM-4WKFG
GBM(T=153,N=1157)	Normal	-5.0116	GTEX-13G51-0011-R7b-SM-5LZXG
GBM(T=153,N=1157)	Normal	-5.5735	GTEX-X585-0011-R3B-SM-46MVG
GBM(T=153,N=1157)	Normal	-9.9658	GTEX-13FLV-0011-R5a-SM-5LZWT
GBM(T=153,N=1157)	Normal	-9.9658	GTEX-13FHP-2926-SM-5IJG9
GBM(T=153,N=1157)	Normal	-6.5064	GTEX-12WSC-0011-R3a-SM-5P9F1
GBM(T=153,N=1157)	Normal	-9.9658	GTEX-12WSA-0011-R10b-SM-5P9ET
GBM(T=153,N=1157)	Normal	-5.5735	GTEX-11O72-2826-SM-5HL6W
GBM(T=153,N=1157)	Normal	-1.3921	GTEX-11EI6-3026-SM-5GZZO
GBM(T=153,N=1157)	Normal	-4.035	GTEX-148VJ-0011-R9b-SM-5SI77
GBM(T=153,N=1157)	Normal	-3.1714	GTEX-N7MT-1226-SM-2D7W4
GBM(T=153,N=1157)	Normal	-9.9658	GTEX-T6MN-0011-R10A-SM-5CHQC
GBM(T=153,N=1157)	Normal	-9.9658	GTEX-11WQK-0011-R11a-SM-5BC6W
GBM(T=153,N=1157)	Normal	-9.9658	GTEX-12WSC-0011-R7b-SM-5LU9L
GBM(T=153,N=1157)	Normal	-6.5064	GTEX-12WSH-3026-SM-5CVNI
GBM(T=153,N=1157)	Normal	-3.6259	GTEX-XLM4-0011-R4B-SM-4AT5C
GBM(T=153,N=1157)	Normal	-3.1714	GTEX-13OVJ-0011-R8b-SM-5L3FS
GBM(T=153,N=1157)	Normal	-5.0116	GTEX-13OW5-0011-R8a-SM-5L3GQ
GBM(T=153,N=1157)	Normal	-9.9658	GTEX-X4XX-0011-R10B-SM-46MWO
GBM(T=153,N=1157)	Normal	-9.9658	GTEX-145MG-3126-SM-5Q5D3
GBM(T=153,N=1157)	Normal	-6.5064	GTEX-13NZ8-0011-R8b-SM-5KM48
GBM(T=153,N=1157)	Normal	-6.5064	GTEX-12WSH-0011-R2a-SM-5GU68
GBM(T=153,N=1157)	Normal	-6.5064	GTEX-131YS-0011-R3b-SM-5DUXB
GBM(T=153,N=1157)	Normal	-6.5064	GTEX-12ZZZ-3026-SM-5BC67
GBM(T=153,N=1157)	Normal	-0.9406	TCGA-06-0678-11
GBM(T=153,N=1157)	Normal	-0.6416	GTEX-XMD1-0011-R8A-SM-4AT48
GBM(T=153,N=1157)	Normal	-4.2934	GTEX-QDT8-0011-R11A-SM-32PKD
GBM(T=153,N=1157)	Normal	-6.5064	GTEX-145LS-0011-R6b-SM-5PNWL
GBM(T=153,N=1157)	Normal	-5.0116	GTEX-11OF3-0011-R8b-SM-57WCS
GBM(T=153,N=1157)	Normal	-9.9658	GTEX-PVOW-0011-R1A-SM-32PL6
GBM(T=153,N=1157)	Normal	-3.816	GTEX-QVJO-0011-R8A-SM-447C7
GBM(T=153,N=1157)	Normal	-3.816	GTEX-QVJO-0011-R5A-SM-2S1QM
GBM(T=153,N=1157)	Normal	-6.5064	GTEX-WZTO-0011-R6B-SM-4E3J6
GBM(T=153,N=1157)	Normal	-2.8262	GTEX-13O3O-3026-SM-5KM42
GBM(T=153,N=1157)	Normal	-9.9658	GTEX-13X6J-0011-R6a-SM-5PNUB
GBM(T=153,N=1157)	Normal	-5.5735	GTEX-ZYFD-3026-SM-5E44C
GBM(T=153,N=1157)	Normal	-9.9658	GTEX-13QIC-0011-R3a-SM-5P9HT
GBM(T=153,N=1157)	Normal	-9.9658	GTEX-13NZ8-0011-R1b-SM-5KM3V
GBM(T=153,N=1157)	Normal	-9.9658	GTEX-14BMV-3026-SM-5S2PQ
GBM(T=153,N=1157)	Normal	-4.035	GTEX-13NYS-0011-R6b-SM-5MR3R
GBM(T=153,N=1157)	Normal	-9.9658	GTEX-13OW8-0011-R11a-SM-5L3GT
GBM(T=153,N=1157)	Normal	-5.0116	GTEX-139TS-3126-SM-5LZWX
GBM(T=153,N=1157)	Normal	-9.9658	GTEX-XOTO-0011-R6B-SM-4B65X
GBM(T=153,N=1157)	Normal	-9.9658	GTEX-RNOR-0011-R7A-SM-2TF4V
GBM(T=153,N=1157)	Normal	-2.3884	GTEX-X4XX-0011-R6B-SM-46MWP
GBM(T=153,N=1157)	Normal	-9.9658	GTEX-13O3Q-0011-R11b-SM-5KM2W
GBM(T=153,N=1157)	Normal	-5.5735	GTEX-145MH-0011-R1b-SM-5PNWY
GBM(T=153,N=1157)	Normal	-4.035	GTEX-ZE7O-3126-SM-5HL5X
GBM(T=153,N=1157)	Normal	-4.6082	GTEX-13G51-3126-SM-5IJG7
GBM(T=153,N=1157)	Normal	-9.9658	GTEX-1477Z-0011-R5b-SM-5PNUO
GBM(T=153,N=1157)	Normal	-1.685	GTEX-RVPV-0011-R3A-SM-2TF63
GBM(T=153,N=1157)	Normal	-9.9658	GTEX-13FXS-3026-SM-5LZYO
GBM(T=153,N=1157)	Normal	-3.1714	GTEX-ZDXO-0011-R10a-SM-4WWD8
GBM(T=153,N=1157)	Normal	-9.9658	GTEX-144GO-0011-R6b-SM-5S2V7
GBM(T=153,N=1157)	Normal	-6.5064	GTEX-13PLJ-0011-R3a-SM-5O9DT
GBM(T=153,N=1157)	Normal	-6.5064	GTEX-13QIC-2926-SM-5J2NF
GBM(T=153,N=1157)	Normal	-4.035	GTEX-145MI-0011-R8b-SM-5PNZ9
GBM(T=153,N=1157)	Normal	-3.6259	GTEX-12ZZX-0011-R7b-SM-5DUVV
GBM(T=153,N=1157)	Normal	-1.7809	GTEX-111FC-3326-SM-5GZYV
GBM(T=153,N=1157)	Normal	-4.035	GTEX-Z93S-0011-R10a-SM-4RGNM
GBM(T=153,N=1157)	Normal	-2.3147	GTEX-YFC4-0011-R6b-SM-4V6E1
GBM(T=153,N=1157)	Normal	-5.0116	GTEX-13OW7-0011-R11a-SM-5O9DY
GBM(T=153,N=1157)	Normal	-9.9658	GTEX-T2IS-0011-R11A-SM-32QPC
GBM(T=153,N=1157)	Normal	-5.0116	GTEX-XOTO-0011-R5A-SM-4B657
GBM(T=153,N=1157)	Normal	1.0779	GTEX-139T4-0011-R9b-SM-5HL6S
GBM(T=153,N=1157)	Normal	-5.0116	GTEX-13VXU-0011-R11b-SM-5O9DJ
GBM(T=153,N=1157)	Normal	-6.5064	GTEX-139TS-0011-R5b-SM-5J2MZ
GBM(T=153,N=1157)	Normal	-4.2934	GTEX-11OF3-0011-R5a-SM-57WB4
GBM(T=153,N=1157)	Normal	-6.5064	GTEX-Q2AG-0011-R7A-SM-2HMJP
GBM(T=153,N=1157)	Normal	-6.5064	GTEX-13X6K-2826-SM-5O9DS
GBM(T=153,N=1157)	Normal	-9.9658	GTEX-1399T-0011-R1b-SM-5DUWN
GBM(T=153,N=1157)	Normal	-4.035	GTEX-XLM4-2926-SM-4AT59
GBM(T=153,N=1157)	Normal	-4.6082	GTEX-131XH-0011-R3b-SM-5DUWM
GBM(T=153,N=1157)	Normal	-9.9658	GTEX-1192X-3226-SM-5987D
GBM(T=153,N=1157)	Normal	-2.2447	GTEX-ZVZQ-0011-R5b-SM-57WDC
GBM(T=153,N=1157)	Normal	-5.5735	GTEX-13X6K-0011-R8b-SM-5PNZ4
GBM(T=153,N=1157)	Normal	-5.5735	GTEX-12ZZZ-0011-R6b-SM-5EQ5B
GBM(T=153,N=1157)	Normal	-9.9658	GTEX-13G51-0011-R6b-SM-5LZX4
GBM(T=153,N=1157)	Normal	-3.3076	GTEX-YFC4-0011-R10a-SM-4SOK5
GBM(T=153,N=1157)	Normal	-9.9658	GTEX-13112-0011-R4b-SM-5DUXL
GBM(T=153,N=1157)	Normal	-5.0116	GTEX-1313W-0011-R1b-SM-5EQ4A
GBM(T=153,N=1157)	Normal	-9.9658	GTEX-Q2AG-2826-SM-2HMJQ
GBMLGG(T=662,N=1157)	Tumor	1.8282	TCGA-19-1787-01
GBMLGG(T=662,N=1157)	Tumor	-5.5735	TCGA-S9-A7J2-01
GBMLGG(T=662,N=1157)	Tumor	-0.7346	TCGA-E1-A7YI-01
GBMLGG(T=662,N=1157)	Tumor	-0.2498	TCGA-06-5412-01
GBMLGG(T=662,N=1157)	Tumor	-2.5479	TCGA-DU-7302-01
GBMLGG(T=662,N=1157)	Tumor	1.3567	TCGA-DU-A7TI-01
GBMLGG(T=662,N=1157)	Tumor	-2.4659	TCGA-16-0846-01
GBMLGG(T=662,N=1157)	Tumor	-5.5735	TCGA-12-5299-01
GBMLGG(T=662,N=1157)	Tumor	-1.5951	TCGA-P5-A5EX-01
GBMLGG(T=662,N=1157)	Tumor	-1.1488	TCGA-HT-8563-01
GBMLGG(T=662,N=1157)	Tumor	-3.3076	TCGA-06-2561-01
GBMLGG(T=662,N=1157)	Tumor	-0.2498	TCGA-DU-7012-01
GBMLGG(T=662,N=1157)	Tumor	-3.458	TCGA-E1-5322-01
GBMLGG(T=662,N=1157)	Tumor	-5.5735	TCGA-HT-8558-01
GBMLGG(T=662,N=1157)	Tumor	-3.0469	TCGA-S9-A6U8-01
GBMLGG(T=662,N=1157)	Tumor	-2.9324	TCGA-CS-5393-01
GBMLGG(T=662,N=1157)	Tumor	-2.0529	TCGA-HT-7854-01
GBMLGG(T=662,N=1157)	Tumor	-3.816	TCGA-HT-7874-01
GBMLGG(T=662,N=1157)	Tumor	-6.5064	TCGA-RY-A845-01
GBMLGG(T=662,N=1157)	Tumor	-1.9379	TCGA-06-0132-01
GBMLGG(T=662,N=1157)	Tumor	-0.0574	TCGA-HT-7616-01
GBMLGG(T=662,N=1157)	Tumor	-4.6082	TCGA-KT-A7W1-01
GBMLGG(T=662,N=1157)	Tumor	-9.9658	TCGA-P5-A5F2-01
GBMLGG(T=662,N=1157)	Tumor	-0.0725	TCGA-26-5136-01
GBMLGG(T=662,N=1157)	Tumor	-3.816	TCGA-27-2521-01
GBMLGG(T=662,N=1157)	Tumor	-3.0469	TCGA-19-2629-01
GBMLGG(T=662,N=1157)	Tumor	-1.4699	TCGA-06-0238-01
GBMLGG(T=662,N=1157)	Tumor	-4.2934	TCGA-06-0749-01
GBMLGG(T=662,N=1157)	Tumor	-5.5735	TCGA-CS-5396-01
GBMLGG(T=662,N=1157)	Tumor	-2.9324	TCGA-HT-7680-01
GBMLGG(T=662,N=1157)	Tumor	-1.8314	TCGA-S9-A7IS-01
GBMLGG(T=662,N=1157)	Tumor	-1.9942	TCGA-06-0174-01
GBMLGG(T=662,N=1157)	Tumor	-5.5735	TCGA-HW-7486-01
GBMLGG(T=662,N=1157)	Tumor	-4.2934	TCGA-P5-A5F1-01
GBMLGG(T=662,N=1157)	Tumor	-2.4659	TCGA-DU-7011-01
GBMLGG(T=662,N=1157)	Tumor	-2.9324	TCGA-06-5414-01
GBMLGG(T=662,N=1157)	Tumor	-4.6082	TCGA-P5-A77X-01
GBMLGG(T=662,N=1157)	Tumor	-6.5064	TCGA-28-5207-01
GBMLGG(T=662,N=1157)	Tumor	-6.5064	TCGA-VM-A8CA-01
GBMLGG(T=662,N=1157)	Tumor	-3.6259	TCGA-DU-7015-01
GBMLGG(T=662,N=1157)	Tumor	-9.9658	TCGA-TM-A7C5-01
GBMLGG(T=662,N=1157)	Tumor	-4.6082	TCGA-DU-8162-01
GBMLGG(T=662,N=1157)	Tumor	-3.3076	TCGA-TM-A84O-01
GBMLGG(T=662,N=1157)	Tumor	-1.9942	TCGA-06-5410-01
GBMLGG(T=662,N=1157)	Tumor	-1.7322	TCGA-06-0747-01
GBMLGG(T=662,N=1157)	Tumor	-1.9379	TCGA-FG-A60K-01
GBMLGG(T=662,N=1157)	Tumor	-3.458	TCGA-S9-A7R3-01
GBMLGG(T=662,N=1157)	Tumor	-3.3076	TCGA-TQ-A7RN-01
GBMLGG(T=662,N=1157)	Tumor	-0.7834	TCGA-28-2513-01
GBMLGG(T=662,N=1157)	Tumor	-9.9658	TCGA-DU-A6S6-01
GBMLGG(T=662,N=1157)	Tumor	-3.6259	TCGA-S9-A7R2-01
GBMLGG(T=662,N=1157)	Tumor	-9.9658	TCGA-P5-A735-01
GBMLGG(T=662,N=1157)	Tumor	-3.6259	TCGA-76-4927-01
GBMLGG(T=662,N=1157)	Tumor	-2.4659	TCGA-HT-7691-01
GBMLGG(T=662,N=1157)	Tumor	-2.4659	TCGA-FG-A6J1-01
GBMLGG(T=662,N=1157)	Tumor	-1.9942	TCGA-DU-6402-01
GBMLGG(T=662,N=1157)	Tumor	-3.0469	TCGA-HT-8104-01
GBMLGG(T=662,N=1157)	Tumor	-1.3921	TCGA-FN-7833-01
GBMLGG(T=662,N=1157)	Tumor	-1.7809	TCGA-HT-7473-01
GBMLGG(T=662,N=1157)	Tumor	-1.9379	TCGA-06-0645-01
GBMLGG(T=662,N=1157)	Tumor	-2.6349	TCGA-06-2565-01
GBMLGG(T=662,N=1157)	Tumor	-2.9324	TCGA-HT-8019-01
GBMLGG(T=662,N=1157)	Tumor	-0.5973	TCGA-06-0130-01
GBMLGG(T=662,N=1157)	Tumor	-2.3147	TCGA-06-0750-01
GBMLGG(T=662,N=1157)	Tumor	-6.5064	TCGA-DB-A4XF-01
GBMLGG(T=662,N=1157)	Tumor	-1.3921	TCGA-HT-A5RA-01
GBMLGG(T=662,N=1157)	Tumor	-1.0559	TCGA-E1-A7YL-01
GBMLGG(T=662,N=1157)	Tumor	-4.035	TCGA-27-1831-01
GBMLGG(T=662,N=1157)	Tumor	-2.0529	TCGA-HT-A61B-01
GBMLGG(T=662,N=1157)	Tumor	-3.458	TCGA-TM-A7CA-01
GBMLGG(T=662,N=1157)	Tumor	-2.6349	TCGA-06-5416-01
GBMLGG(T=662,N=1157)	Tumor	-9.9658	TCGA-HT-7684-01
GBMLGG(T=662,N=1157)	Tumor	-2.6349	TCGA-HW-8322-01
GBMLGG(T=662,N=1157)	Tumor	-2.5479	TCGA-S9-A6U9-01
GBMLGG(T=662,N=1157)	Tumor	-4.6082	TCGA-HT-7676-01
GBMLGG(T=662,N=1157)	Tumor	-9.9658	TCGA-HT-7469-01
GBMLGG(T=662,N=1157)	Tumor	-3.0469	TCGA-DH-A7UU-01
GBMLGG(T=662,N=1157)	Tumor	-4.6082	TCGA-HT-7873-01
GBMLGG(T=662,N=1157)	Tumor	-3.816	TCGA-HW-A5KK-01
GBMLGG(T=662,N=1157)	Tumor	-4.035	TCGA-DB-A64P-01
GBMLGG(T=662,N=1157)	Tumor	-1.1488	TCGA-HT-7478-01
GBMLGG(T=662,N=1157)	Tumor	-3.6259	TCGA-S9-A6TX-01
GBMLGG(T=662,N=1157)	Tumor	-2.3884	TCGA-RY-A83Z-01
GBMLGG(T=662,N=1157)	Tumor	-2.0529	TCGA-FG-6688-01
GBMLGG(T=662,N=1157)	Tumor	-2.8262	TCGA-06-0141-01
GBMLGG(T=662,N=1157)	Tumor	-6.5064	TCGA-06-0125-01
GBMLGG(T=662,N=1157)	Tumor	-9.9658	TCGA-FG-A4MT-01
GBMLGG(T=662,N=1157)	Tumor	-3.6259	TCGA-76-4925-01
GBMLGG(T=662,N=1157)	Tumor	-3.3076	TCGA-FG-A6IZ-01
GBMLGG(T=662,N=1157)	Tumor	-2.9324	TCGA-HT-8113-01
GBMLGG(T=662,N=1157)	Tumor	-4.6082	TCGA-DH-A7UT-01
GBMLGG(T=662,N=1157)	Tumor	-9.9658	TCGA-76-4932-01
GBMLGG(T=662,N=1157)	Tumor	-6.5064	TCGA-EZ-7264-01
GBMLGG(T=662,N=1157)	Tumor	-3.816	TCGA-TQ-A7RF-01
GBMLGG(T=662,N=1157)	Tumor	-4.2934	TCGA-28-2510-01
GBMLGG(T=662,N=1157)	Tumor	-3.458	TCGA-DB-5274-01
GBMLGG(T=662,N=1157)	Tumor	-9.9658	TCGA-S9-A7R8-01
GBMLGG(T=662,N=1157)	Tumor	-4.2934	TCGA-FG-7641-01
GBMLGG(T=662,N=1157)	Tumor	-6.5064	TCGA-HW-7495-01
GBMLGG(T=662,N=1157)	Tumor	-5.5735	TCGA-CS-6669-01
GBMLGG(T=662,N=1157)	Tumor	-4.6082	TCGA-HT-7481-01
GBMLGG(T=662,N=1157)	Tumor	-4.6082	TCGA-DU-8163-01
GBMLGG(T=662,N=1157)	Tumor	-3.6259	TCGA-S9-A6WD-01
GBMLGG(T=662,N=1157)	Tumor	-6.5064	TCGA-CS-4942-01
GBMLGG(T=662,N=1157)	Tumor	1.5216	TCGA-HT-8110-01
GBMLGG(T=662,N=1157)	Tumor	2.8321	TCGA-HT-8106-01
GBMLGG(T=662,N=1157)	Tumor	-2.3884	TCGA-QH-A6CW-01
GBMLGG(T=662,N=1157)	Tumor	-4.6082	TCGA-RY-A840-01
GBMLGG(T=662,N=1157)	Tumor	-1.4305	TCGA-06-0743-01
GBMLGG(T=662,N=1157)	Tumor	-4.6082	TCGA-HW-8319-01
GBMLGG(T=662,N=1157)	Tumor	-9.9658	TCGA-HT-7482-01
GBMLGG(T=662,N=1157)	Tumor	-5.5735	TCGA-DU-5870-01
GBMLGG(T=662,N=1157)	Tumor	-4.6082	TCGA-E1-5304-01
GBMLGG(T=662,N=1157)	Tumor	-4.035	TCGA-TM-A84S-01
GBMLGG(T=662,N=1157)	Tumor	-4.6082	TCGA-CS-4943-01
GBMLGG(T=662,N=1157)	Tumor	-3.6259	TCGA-E1-A7Z3-01
GBMLGG(T=662,N=1157)	Tumor	-2.3884	TCGA-14-1034-01
GBMLGG(T=662,N=1157)	Tumor	-3.1714	TCGA-06-0184-01
GBMLGG(T=662,N=1157)	Tumor	-3.6259	TCGA-12-3652-01
GBMLGG(T=662,N=1157)	Tumor	-6.5064	TCGA-FG-8182-01
GBMLGG(T=662,N=1157)	Tumor	-1.2481	TCGA-26-5132-01
GBMLGG(T=662,N=1157)	Tumor	-4.6082	TCGA-DU-A5TW-01
GBMLGG(T=662,N=1157)	Tumor	-4.2934	TCGA-TQ-A7RP-01
GBMLGG(T=662,N=1157)	Tumor	-5.5735	TCGA-HT-7689-01
GBMLGG(T=662,N=1157)	Tumor	-9.9658	TCGA-FG-7638-01
GBMLGG(T=662,N=1157)	Tumor	-4.2934	TCGA-32-1970-01
GBMLGG(T=662,N=1157)	Tumor	-4.6082	TCGA-P5-A5EV-01
GBMLGG(T=662,N=1157)	Tumor	-2.8262	TCGA-HT-7476-01
GBMLGG(T=662,N=1157)	Tumor	-9.9658	TCGA-TQ-A7RG-01
GBMLGG(T=662,N=1157)	Tumor	-0.5543	TCGA-TM-A84F-01
GBMLGG(T=662,N=1157)	Tumor	-4.035	TCGA-FG-8181-01
GBMLGG(T=662,N=1157)	Tumor	-9.9658	TCGA-DU-A7T6-01
GBMLGG(T=662,N=1157)	Tumor	-4.6082	TCGA-DB-A4XC-01
GBMLGG(T=662,N=1157)	Tumor	-2.9324	TCGA-06-0219-01
GBMLGG(T=662,N=1157)	Tumor	-4.6082	TCGA-14-0787-01
GBMLGG(T=662,N=1157)	Tumor	-4.2934	TCGA-S9-A6U2-01
GBMLGG(T=662,N=1157)	Tumor	-9.9658	TCGA-DB-A75M-01
GBMLGG(T=662,N=1157)	Tumor	-5.0116	TCGA-HT-8012-01
GBMLGG(T=662,N=1157)	Tumor	-6.5064	TCGA-S9-A7QW-01
GBMLGG(T=662,N=1157)	Tumor	-3.816	TCGA-P5-A733-01
GBMLGG(T=662,N=1157)	Tumor	-3.0469	TCGA-E1-A7Z4-01
GBMLGG(T=662,N=1157)	Tumor	-4.2934	TCGA-FG-8185-01
GBMLGG(T=662,N=1157)	Tumor	-2.9324	TCGA-FG-A4MW-01
GBMLGG(T=662,N=1157)	Tumor	-2.9324	TCGA-HW-8320-01
GBMLGG(T=662,N=1157)	Tumor	-4.035	TCGA-DU-5849-01
GBMLGG(T=662,N=1157)	Tumor	-1.3921	TCGA-06-0190-01
GBMLGG(T=662,N=1157)	Tumor	-3.1714	TCGA-DB-5273-01
GBMLGG(T=662,N=1157)	Tumor	-2.7274	TCGA-R8-A6MO-01
GBMLGG(T=662,N=1157)	Tumor	-2.6349	TCGA-CS-6670-01
GBMLGG(T=662,N=1157)	Tumor	-2.1779	TCGA-DU-5854-01
GBMLGG(T=662,N=1157)	Tumor	-5.5735	TCGA-S9-A6WL-01
GBMLGG(T=662,N=1157)	Tumor	-5.0116	TCGA-S9-A6TV-01
GBMLGG(T=662,N=1157)	Tumor	-1.2828	TCGA-26-5135-01
GBMLGG(T=662,N=1157)	Tumor	-6.5064	TCGA-S9-A6WE-01
GBMLGG(T=662,N=1157)	Tumor	-4.2934	TCGA-76-4931-01
GBMLGG(T=662,N=1157)	Tumor	-5.5735	TCGA-QH-A6XA-01
GBMLGG(T=662,N=1157)	Tumor	-5.0116	TCGA-DU-6393-01
GBMLGG(T=662,N=1157)	Tumor	-3.6259	TCGA-41-3915-01
GBMLGG(T=662,N=1157)	Tumor	-4.6082	TCGA-VM-A8C9-01
GBMLGG(T=662,N=1157)	Tumor	-1.9379	TCGA-06-0649-01
GBMLGG(T=662,N=1157)	Tumor	-0.0425	TCGA-DU-5853-01
GBMLGG(T=662,N=1157)	Tumor	-4.6082	TCGA-12-0618-01
GBMLGG(T=662,N=1157)	Tumor	-9.9658	TCGA-FG-5962-01
GBMLGG(T=662,N=1157)	Tumor	-0.9686	TCGA-27-2524-01
GBMLGG(T=662,N=1157)	Tumor	-9.9658	TCGA-QH-A65S-01
GBMLGG(T=662,N=1157)	Tumor	-5.0116	TCGA-F6-A8O4-01
GBMLGG(T=662,N=1157)	Tumor	-1.2828	TCGA-28-1753-01
GBMLGG(T=662,N=1157)	Tumor	-3.458	TCGA-QH-A870-01
GBMLGG(T=662,N=1157)	Tumor	-5.5735	TCGA-S9-A7R1-01
GBMLGG(T=662,N=1157)	Tumor	-9.9658	TCGA-TQ-A7RH-01
GBMLGG(T=662,N=1157)	Tumor	-6.5064	TCGA-12-5295-01
GBMLGG(T=662,N=1157)	Tumor	-2.1779	TCGA-E1-A7YQ-01
GBMLGG(T=662,N=1157)	Tumor	-3.1714	TCGA-27-2523-01
GBMLGG(T=662,N=1157)	Tumor	-2.3147	TCGA-HT-8107-01
GBMLGG(T=662,N=1157)	Tumor	-4.6082	TCGA-P5-A5ET-01
GBMLGG(T=662,N=1157)	Tumor	-6.5064	TCGA-P5-A72W-01
GBMLGG(T=662,N=1157)	Tumor	-2.3147	TCGA-DB-A64L-01
GBMLGG(T=662,N=1157)	Tumor	-3.3076	TCGA-HW-7493-01
GBMLGG(T=662,N=1157)	Tumor	-4.035	TCGA-TM-A84R-01
GBMLGG(T=662,N=1157)	Tumor	-9.9658	TCGA-HT-A74L-01
GBMLGG(T=662,N=1157)	Tumor	-2.114	TCGA-HT-7477-01
GBMLGG(T=662,N=1157)	Tumor	-3.458	TCGA-FG-A87Q-01
GBMLGG(T=662,N=1157)	Tumor	0.8961	TCGA-FG-A70Z-01
GBMLGG(T=662,N=1157)	Tumor	-2.8262	TCGA-FG-A4MU-01
GBMLGG(T=662,N=1157)	Tumor	-2.7274	TCGA-DB-A4XB-01
GBMLGG(T=662,N=1157)	Tumor	-2.7274	TCGA-WY-A85D-01
GBMLGG(T=662,N=1157)	Tumor	-3.1714	TCGA-DU-A5TR-01
GBMLGG(T=662,N=1157)	Tumor	0.6608	TCGA-CS-4941-01
GBMLGG(T=662,N=1157)	Tumor	-4.2934	TCGA-HT-A615-01
GBMLGG(T=662,N=1157)	Tumor	-2.9324	TCGA-06-2569-01
GBMLGG(T=662,N=1157)	Tumor	-6.5064	TCGA-HT-A5RB-01
GBMLGG(T=662,N=1157)	Tumor	-0.1828	TCGA-E1-A7YN-01
GBMLGG(T=662,N=1157)	Tumor	-1.9942	TCGA-27-1830-01
GBMLGG(T=662,N=1157)	Tumor	-3.816	TCGA-QH-A6XC-01
GBMLGG(T=662,N=1157)	Tumor	-2.3147	TCGA-06-2559-01
GBMLGG(T=662,N=1157)	Tumor	-1.8314	TCGA-S9-A6WN-01
GBMLGG(T=662,N=1157)	Tumor	-9.9658	TCGA-P5-A72X-01
GBMLGG(T=662,N=1157)	Tumor	-2.4659	TCGA-WY-A858-01
GBMLGG(T=662,N=1157)	Tumor	-4.6082	TCGA-DU-7014-01
GBMLGG(T=662,N=1157)	Tumor	-6.5064	TCGA-27-2526-01
GBMLGG(T=662,N=1157)	Tumor	-4.6082	TCGA-VM-A8CF-01
GBMLGG(T=662,N=1157)	Tumor	-2.1779	TCGA-06-5856-01
GBMLGG(T=662,N=1157)	Tumor	-2.9324	TCGA-26-1442-01
GBMLGG(T=662,N=1157)	Tumor	-9.9658	TCGA-CS-4938-01
GBMLGG(T=662,N=1157)	Tumor	-1.1811	TCGA-DU-8166-01
GBMLGG(T=662,N=1157)	Tumor	-2.114	TCGA-DU-7300-01
GBMLGG(T=662,N=1157)	Tumor	-3.458	TCGA-DU-7292-01
GBMLGG(T=662,N=1157)	Tumor	-3.816	TCGA-DB-A75P-01
GBMLGG(T=662,N=1157)	Tumor	-2.9324	TCGA-06-5418-01
GBMLGG(T=662,N=1157)	Tumor	-9.9658	TCGA-FG-6691-01
GBMLGG(T=662,N=1157)	Tumor	-2.4659	TCGA-26-5139-01
GBMLGG(T=662,N=1157)	Tumor	-9.9658	TCGA-06-5417-01
GBMLGG(T=662,N=1157)	Tumor	-5.5735	TCGA-DB-5279-01
GBMLGG(T=662,N=1157)	Tumor	-5.0116	TCGA-S9-A6WI-01
GBMLGG(T=662,N=1157)	Tumor	-2.3884	TCGA-DB-A64S-01
GBMLGG(T=662,N=1157)	Tumor	-4.6082	TCGA-FG-6692-01
GBMLGG(T=662,N=1157)	Tumor	-3.3076	TCGA-HW-7489-01
GBMLGG(T=662,N=1157)	Tumor	-3.6259	TCGA-R8-A6YH-01
GBMLGG(T=662,N=1157)	Tumor	-9.9658	TCGA-26-5134-01
GBMLGG(T=662,N=1157)	Tumor	-2.7274	TCGA-HT-8114-01
GBMLGG(T=662,N=1157)	Tumor	-4.6082	TCGA-TM-A84H-01
GBMLGG(T=662,N=1157)	Tumor	-3.3076	TCGA-DB-A64V-01
GBMLGG(T=662,N=1157)	Tumor	-9.9658	TCGA-DU-7019-01
GBMLGG(T=662,N=1157)	Tumor	-9.9658	TCGA-S9-A7R4-01
GBMLGG(T=662,N=1157)	Tumor	-5.0116	TCGA-S9-A7J3-01
GBMLGG(T=662,N=1157)	Tumor	-2.7274	TCGA-TM-A84L-01
GBMLGG(T=662,N=1157)	Tumor	-4.6082	TCGA-E1-A7YH-01
GBMLGG(T=662,N=1157)	Tumor	-0.3383	TCGA-06-5413-01
GBMLGG(T=662,N=1157)	Tumor	-1.7809	TCGA-76-4929-01
GBMLGG(T=662,N=1157)	Tumor	-0.7834	TCGA-06-0646-01
GBMLGG(T=662,N=1157)	Tumor	-3.458	TCGA-QH-A65Z-01
GBMLGG(T=662,N=1157)	Tumor	-2.9324	TCGA-DU-A7TD-01
GBMLGG(T=662,N=1157)	Tumor	-4.035	TCGA-DU-5871-01
GBMLGG(T=662,N=1157)	Tumor	-6.5064	TCGA-HW-A5KL-01
GBMLGG(T=662,N=1157)	Tumor	-3.1714	TCGA-RY-A83X-01
GBMLGG(T=662,N=1157)	Tumor	-1.2481	TCGA-HT-7687-01
GBMLGG(T=662,N=1157)	Tumor	-9.9658	TCGA-HT-A4DV-01
GBMLGG(T=662,N=1157)	Tumor	-2.7274	TCGA-WY-A85A-01
GBMLGG(T=662,N=1157)	Tumor	-9.9658	TCGA-12-3650-01
GBMLGG(T=662,N=1157)	Tumor	-5.5735	TCGA-19-2620-01
GBMLGG(T=662,N=1157)	Tumor	-6.5064	TCGA-DB-5281-01
GBMLGG(T=662,N=1157)	Tumor	-4.035	TCGA-E1-A7YK-01
GBMLGG(T=662,N=1157)	Tumor	-5.5735	TCGA-28-5213-01
GBMLGG(T=662,N=1157)	Tumor	-9.9658	TCGA-DU-A7TA-01
GBMLGG(T=662,N=1157)	Tumor	-3.458	TCGA-CS-5395-01
GBMLGG(T=662,N=1157)	Tumor	-2.6349	TCGA-DH-A7UR-01
GBMLGG(T=662,N=1157)	Tumor	-2.8262	TCGA-DU-6400-01
GBMLGG(T=662,N=1157)	Tumor	-2.2447	TCGA-06-0138-01
GBMLGG(T=662,N=1157)	Tumor	1.3283	TCGA-HT-A5R5-01
GBMLGG(T=662,N=1157)	Tumor	-1.2142	TCGA-HT-8018-01
GBMLGG(T=662,N=1157)	Tumor	-2.7274	TCGA-FG-A713-01
GBMLGG(T=662,N=1157)	Tumor	-5.0116	TCGA-S9-A6WP-01
GBMLGG(T=662,N=1157)	Tumor	-1.9942	TCGA-S9-A6U5-01
GBMLGG(T=662,N=1157)	Tumor	-6.5064	TCGA-E1-A7YO-01
GBMLGG(T=662,N=1157)	Tumor	-0.8863	TCGA-FG-A710-01
GBMLGG(T=662,N=1157)	Tumor	-4.6082	TCGA-QH-A6X8-01
GBMLGG(T=662,N=1157)	Tumor	-5.0116	TCGA-06-5415-01
GBMLGG(T=662,N=1157)	Tumor	-4.035	TCGA-HT-7610-01
GBMLGG(T=662,N=1157)	Tumor	-3.816	TCGA-HT-7875-01
GBMLGG(T=662,N=1157)	Tumor	-6.5064	TCGA-DU-A6S3-01
GBMLGG(T=662,N=1157)	Tumor	-3.816	TCGA-R8-A6MK-01
GBMLGG(T=662,N=1157)	Tumor	-9.9658	TCGA-P5-A5F0-01
GBMLGG(T=662,N=1157)	Tumor	-1.9942	TCGA-06-0139-01
GBMLGG(T=662,N=1157)	Tumor	-0.3752	TCGA-02-0047-01
GBMLGG(T=662,N=1157)	Tumor	-4.6082	TCGA-S9-A6TS-01
GBMLGG(T=662,N=1157)	Tumor	-4.035	TCGA-S9-A6TW-01
GBMLGG(T=662,N=1157)	Tumor	-3.1714	TCGA-E1-5303-01
GBMLGG(T=662,N=1157)	Tumor	-9.9658	TCGA-DU-7299-01
GBMLGG(T=662,N=1157)	Tumor	-2.2447	TCGA-DH-5140-01
GBMLGG(T=662,N=1157)	Tumor	-5.5735	TCGA-S9-A7QX-01
GBMLGG(T=662,N=1157)	Tumor	-4.6082	TCGA-DU-6408-01
GBMLGG(T=662,N=1157)	Tumor	-4.035	TCGA-14-0789-01
GBMLGG(T=662,N=1157)	Tumor	-5.5735	TCGA-FG-5964-01
GBMLGG(T=662,N=1157)	Tumor	-2.3147	TCGA-DB-A64Q-01
GBMLGG(T=662,N=1157)	Tumor	-3.816	TCGA-S9-A6WH-01
GBMLGG(T=662,N=1157)	Tumor	-1.6394	TCGA-12-0616-01
GBMLGG(T=662,N=1157)	Tumor	-4.6082	TCGA-DU-A6S8-01
GBMLGG(T=662,N=1157)	Tumor	-3.3076	TCGA-HT-7858-01
GBMLGG(T=662,N=1157)	Tumor	-0.7588	TCGA-32-1982-01
GBMLGG(T=662,N=1157)	Tumor	-1.4305	TCGA-HT-7860-01
GBMLGG(T=662,N=1157)	Tumor	-4.2934	TCGA-DU-7006-01
GBMLGG(T=662,N=1157)	Tumor	-9.9658	TCGA-TQ-A7RS-01
GBMLGG(T=662,N=1157)	Tumor	-9.9658	TCGA-DU-7009-01
GBMLGG(T=662,N=1157)	Tumor	-3.816	TCGA-DU-7010-01
GBMLGG(T=662,N=1157)	Tumor	-9.9658	TCGA-QH-A6X3-01
GBMLGG(T=662,N=1157)	Tumor	-2.8262	TCGA-DU-8164-01
GBMLGG(T=662,N=1157)	Tumor	-4.035	TCGA-DU-7018-01
GBMLGG(T=662,N=1157)	Tumor	-9.9658	TCGA-R8-A73M-01
GBMLGG(T=662,N=1157)	Tumor	-3.816	TCGA-DB-A75L-01
GBMLGG(T=662,N=1157)	Tumor	-5.5735	TCGA-RY-A843-01
GBMLGG(T=662,N=1157)	Tumor	-2.3884	TCGA-HT-7693-01
GBMLGG(T=662,N=1157)	Tumor	-2.3884	TCGA-DU-A76L-01
GBMLGG(T=662,N=1157)	Tumor	-0.9406	TCGA-28-5220-01
GBMLGG(T=662,N=1157)	Tumor	-2.3147	TCGA-HT-7472-01
GBMLGG(T=662,N=1157)	Tumor	-2.9324	TCGA-14-0817-01
GBMLGG(T=662,N=1157)	Tumor	-1.5522	TCGA-12-1597-01
GBMLGG(T=662,N=1157)	Tumor	-5.5735	TCGA-06-2570-01
GBMLGG(T=662,N=1157)	Tumor	-6.5064	TCGA-TQ-A8XE-01
GBMLGG(T=662,N=1157)	Tumor	-4.2934	TCGA-HT-A616-01
GBMLGG(T=662,N=1157)	Tumor	-6.5064	TCGA-FG-A4MY-01
GBMLGG(T=662,N=1157)	Tumor	-3.458	TCGA-HT-7681-01
GBMLGG(T=662,N=1157)	Tumor	-3.816	TCGA-CS-5390-01
GBMLGG(T=662,N=1157)	Tumor	-4.6082	TCGA-DU-A6S2-01
GBMLGG(T=662,N=1157)	Tumor	-2.0529	TCGA-P5-A5EW-01
GBMLGG(T=662,N=1157)	Tumor	-5.0116	TCGA-DU-7309-01
GBMLGG(T=662,N=1157)	Tumor	-3.816	TCGA-FG-A87N-01
GBMLGG(T=662,N=1157)	Tumor	-5.5735	TCGA-DB-A4XH-01
GBMLGG(T=662,N=1157)	Tumor	-3.6259	TCGA-HT-7485-01
GBMLGG(T=662,N=1157)	Tumor	-2.05292	TCGA-06-0211-01
GBMLGG(T=662,N=1157)	Tumor	-3.458	TCGA-VV-A86M-01
GBMLGG(T=662,N=1157)	Tumor	-3.458	TCGA-HT-7468-01
GBMLGG(T=662,N=1157)	Tumor	-1.7809	TCGA-02-2483-01
GBMLGG(T=662,N=1157)	Tumor	-3.6259	TCGA-HT-7677-01
GBMLGG(T=662,N=1157)	Tumor	-9.9658	TCGA-VW-A7QS-01
GBMLGG(T=662,N=1157)	Tumor	-2.5479	TCGA-DU-A5TY-01
GBMLGG(T=662,N=1157)	Tumor	-6.5064	TCGA-HT-8109-01
GBMLGG(T=662,N=1157)	Tumor	0.92295	TCGA-06-0156-01
GBMLGG(T=662,N=1157)	Tumor	-3.3076	TCGA-S9-A6TZ-01
GBMLGG(T=662,N=1157)	Tumor	-2.9324	TCGA-HT-7606-01
GBMLGG(T=662,N=1157)	Tumor	-1.1172	TCGA-DH-5142-01
GBMLGG(T=662,N=1157)	Tumor	-9.9658	TCGA-DU-7294-01
GBMLGG(T=662,N=1157)	Tumor	-5.0116	TCGA-HT-7479-01
GBMLGG(T=662,N=1157)	Tumor	0.5955	TCGA-DB-5275-01
GBMLGG(T=662,N=1157)	Tumor	-9.9658	TCGA-TM-A7C4-01
GBMLGG(T=662,N=1157)	Tumor	-0.4719	TCGA-27-1837-01
GBMLGG(T=662,N=1157)	Tumor	-1.7809	TCGA-DU-5872-01
GBMLGG(T=662,N=1157)	Tumor	-4.6082	TCGA-FG-8186-01
GBMLGG(T=662,N=1157)	Tumor	-3.1714	TCGA-TM-A84I-01
GBMLGG(T=662,N=1157)	Tumor	-5.5735	TCGA-S9-A6U6-01
GBMLGG(T=662,N=1157)	Tumor	-3.6259	TCGA-E1-5305-01
GBMLGG(T=662,N=1157)	Tumor	-1.7809	TCGA-DU-6395-01
GBMLGG(T=662,N=1157)	Tumor	-1.2828	TCGA-28-5204-01
GBMLGG(T=662,N=1157)	Tumor	-6.5064	TCGA-TM-A84T-01
GBMLGG(T=662,N=1157)	Tumor	-4.6082	TCGA-HT-7879-01
GBMLGG(T=662,N=1157)	Tumor	-5.5735	TCGA-S9-A7IZ-01
GBMLGG(T=662,N=1157)	Tumor	-3.1714	TCGA-HT-7602-01
GBMLGG(T=662,N=1157)	Tumor	-4.035	TCGA-32-5222-01
GBMLGG(T=662,N=1157)	Tumor	-1.9379	TCGA-DU-A7TJ-01
GBMLGG(T=662,N=1157)	Tumor	-3.3076	TCGA-28-5209-01
GBMLGG(T=662,N=1157)	Tumor	-9.9658	TCGA-P5-A77W-01
GBMLGG(T=662,N=1157)	Tumor	-0.3383	TCGA-27-2519-01
GBMLGG(T=662,N=1157)	Tumor	-4.035	TCGA-CS-6186-01
GBMLGG(T=662,N=1157)	Tumor	-3.0469	TCGA-DU-7008-01
GBMLGG(T=662,N=1157)	Tumor	-9.9658	TCGA-14-0790-01
GBMLGG(T=662,N=1157)	Tumor	-0.7588	TCGA-P5-A5EU-01
GBMLGG(T=662,N=1157)	Tumor	-4.035	TCGA-HT-7688-01
GBMLGG(T=662,N=1157)	Tumor	-3.6259	TCGA-DU-A7T8-01
GBMLGG(T=662,N=1157)	Tumor	-3.458	TCGA-DB-A64U-01
GBMLGG(T=662,N=1157)	Tumor	-3.3076	TCGA-HT-A61C-01
GBMLGG(T=662,N=1157)	Tumor	-1.8314	TCGA-12-0821-01
GBMLGG(T=662,N=1157)	Tumor	-2.1779	TCGA-19-2619-01
GBMLGG(T=662,N=1157)	Tumor	-9.9658	TCGA-F6-A8O3-01
GBMLGG(T=662,N=1157)	Tumor	-4.2934	TCGA-DB-A64O-01
GBMLGG(T=662,N=1157)	Tumor	-5.5735	TCGA-R8-A6ML-01
GBMLGG(T=662,N=1157)	Tumor	-4.6082	TCGA-DU-A5TT-01
GBMLGG(T=662,N=1157)	Tumor	-1.1488	TCGA-27-1835-01
GBMLGG(T=662,N=1157)	Tumor	-5.5735	TCGA-HT-8111-01
GBMLGG(T=662,N=1157)	Tumor	-2.6349	TCGA-S9-A7QZ-01
GBMLGG(T=662,N=1157)	Tumor	-1.5951	TCGA-12-0619-01
GBMLGG(T=662,N=1157)	Tumor	-1.1811	TCGA-06-0168-01
GBMLGG(T=662,N=1157)	Tumor	-5.5735	TCGA-IK-7675-01
GBMLGG(T=662,N=1157)	Tumor	-3.1714	TCGA-TQ-A7RW-01
GBMLGG(T=662,N=1157)	Tumor	-3.458	TCGA-TQ-A7RU-01
GBMLGG(T=662,N=1157)	Tumor	-5.5735	TCGA-27-2528-01
GBMLGG(T=662,N=1157)	Tumor	-5.0116	TCGA-HT-7470-01
GBMLGG(T=662,N=1157)	Tumor	-4.6082	TCGA-HT-8108-01
GBMLGG(T=662,N=1157)	Tumor	-3.3076	TCGA-DB-A4XE-01
GBMLGG(T=662,N=1157)	Tumor	-1.5522	TCGA-HT-A4DS-01
GBMLGG(T=662,N=1157)	Tumor	-6.5064	TCGA-E1-A7YU-01
GBMLGG(T=662,N=1157)	Tumor	-1.9942	TCGA-DU-8158-01
GBMLGG(T=662,N=1157)	Tumor	-9.9658	TCGA-HT-7474-01
GBMLGG(T=662,N=1157)	Tumor	-5.0116	TCGA-DH-5143-01
GBMLGG(T=662,N=1157)	Tumor	-5.5735	TCGA-TQ-A7RJ-01
GBMLGG(T=662,N=1157)	Tumor	-4.2934	TCGA-TM-A84J-01
GBMLGG(T=662,N=1157)	Tumor	-2.3884	TCGA-E1-A7YD-01
GBMLGG(T=662,N=1157)	Tumor	-2.3884	TCGA-S9-A7QY-01
GBMLGG(T=662,N=1157)	Tumor	-9.9658	TCGA-P5-A731-01
GBMLGG(T=662,N=1157)	Tumor	0.3346	TCGA-E1-A7YE-01
GBMLGG(T=662,N=1157)	Tumor	-4.035	TCGA-HW-8321-01
GBMLGG(T=662,N=1157)	Tumor	-2.4659	TCGA-HT-8010-01
GBMLGG(T=662,N=1157)	Tumor	-3.0469	TCGA-DB-5270-01
GBMLGG(T=662,N=1157)	Tumor	-3.6259	TCGA-HT-A5R9-01
GBMLGG(T=662,N=1157)	Tumor	-4.6082	TCGA-KT-A74X-01
GBMLGG(T=662,N=1157)	Tumor	-2.6349	TCGA-HT-A74K-01
GBMLGG(T=662,N=1157)	Tumor	-2.9324	TCGA-WY-A85C-01
GBMLGG(T=662,N=1157)	Tumor	-5.0116	TCGA-FG-8188-01
GBMLGG(T=662,N=1157)	Tumor	-3.6259	TCGA-DU-A6S7-01
GBMLGG(T=662,N=1157)	Tumor	-3.816	TCGA-HT-7855-01
GBMLGG(T=662,N=1157)	Tumor	-6.5064	TCGA-HT-8015-01
GBMLGG(T=662,N=1157)	Tumor	-9.9658	TCGA-DB-A75O-01
GBMLGG(T=662,N=1157)	Tumor	-6.5064	TCGA-S9-A6TY-01
GBMLGG(T=662,N=1157)	Tumor	-6.5064	TCGA-DU-A7TB-01
GBMLGG(T=662,N=1157)	Tumor	-9.9658	TCGA-HT-7604-01
GBMLGG(T=662,N=1157)	Tumor	-9.9658	TCGA-HT-7884-01
GBMLGG(T=662,N=1157)	Tumor	-1.8314	TCGA-28-5215-01
GBMLGG(T=662,N=1157)	Tumor	-5.5735	TCGA-QH-A6CY-01
GBMLGG(T=662,N=1157)	Tumor	-9.9658	TCGA-S9-A6WM-01
GBMLGG(T=662,N=1157)	Tumor	-4.035	TCGA-CS-6667-01
GBMLGG(T=662,N=1157)	Tumor	-1.8836	TCGA-28-5218-01
GBMLGG(T=662,N=1157)	Tumor	-5.5735	TCGA-QH-A6CV-01
GBMLGG(T=662,N=1157)	Tumor	-4.035	TCGA-VM-A8CE-01
GBMLGG(T=662,N=1157)	Tumor	-4.6082	TCGA-DB-A64X-01
GBMLGG(T=662,N=1157)	Tumor	-1.0559	TCGA-P5-A72U-01
GBMLGG(T=662,N=1157)	Tumor	-5.5735	TCGA-DB-A75K-01
GBMLGG(T=662,N=1157)	Tumor	-3.3076	TCGA-DU-6410-01
GBMLGG(T=662,N=1157)	Tumor	-4.6082	TCGA-14-1825-01
GBMLGG(T=662,N=1157)	Tumor	-6.5064	TCGA-E1-5307-01
GBMLGG(T=662,N=1157)	Tumor	-3.3076	TCGA-S9-A7IY-01
GBMLGG(T=662,N=1157)	Tumor	-3.816	TCGA-P5-A781-01
GBMLGG(T=662,N=1157)	Tumor	-4.6082	TCGA-DU-6405-01
GBMLGG(T=662,N=1157)	Tumor	-1.4699	TCGA-06-0129-01
GBMLGG(T=662,N=1157)	Tumor	-2.2447	TCGA-DU-5852-01
GBMLGG(T=662,N=1157)	Tumor	-3.0469	TCGA-FG-A6J3-01
GBMLGG(T=662,N=1157)	Tumor	-2.5479	TCGA-CS-5397-01
GBMLGG(T=662,N=1157)	Tumor	-5.5735	TCGA-FG-A70Y-01
GBMLGG(T=662,N=1157)	Tumor	-4.6082	TCGA-FG-7643-01
GBMLGG(T=662,N=1157)	Tumor	-4.2934	TCGA-06-5859-01
GBMLGG(T=662,N=1157)	Tumor	-2.6349	TCGA-TM-A84C-01
GBMLGG(T=662,N=1157)	Tumor	-5.5735	TCGA-WY-A85E-01
GBMLGG(T=662,N=1157)	Tumor	-2.9324	TCGA-28-1747-01
GBMLGG(T=662,N=1157)	Tumor	-9.9658	TCGA-28-2499-01
GBMLGG(T=662,N=1157)	Tumor	-3.6259	TCGA-HW-A5KM-01
GBMLGG(T=662,N=1157)	Tumor	-1.8836	TCGA-32-1980-01
GBMLGG(T=662,N=1157)	Tumor	-9.9658	TCGA-DU-7298-01
GBMLGG(T=662,N=1157)	Tumor	-1.5951	TCGA-FG-7637-01
GBMLGG(T=662,N=1157)	Tumor	-2.1779	TCGA-QH-A65R-01
GBMLGG(T=662,N=1157)	Tumor	-1.9379	TCGA-FG-A60J-01
GBMLGG(T=662,N=1157)	Tumor	-3.3076	TCGA-FG-8189-01
GBMLGG(T=662,N=1157)	Tumor	-4.6082	TCGA-P5-A5EY-01
GBMLGG(T=662,N=1157)	Tumor	-2.0529	TCGA-06-2564-01
GBMLGG(T=662,N=1157)	Tumor	-2.9324	TCGA-06-5408-01
GBMLGG(T=662,N=1157)	Tumor	0.7058	TCGA-27-1832-01
GBMLGG(T=662,N=1157)	Tumor	-3.0469	TCGA-14-1829-01
GBMLGG(T=662,N=1157)	Tumor	-4.035	TCGA-QH-A6X5-01
GBMLGG(T=662,N=1157)	Tumor	-0.8599	TCGA-32-2615-01
GBMLGG(T=662,N=1157)	Tumor	-0.4719	TCGA-06-0158-01
GBMLGG(T=662,N=1157)	Tumor	-3.816	TCGA-HT-7605-01
GBMLGG(T=662,N=1157)	Tumor	-5.0116	TCGA-DU-6394-01
GBMLGG(T=662,N=1157)	Tumor	-6.5064	TCGA-S9-A6WO-01
GBMLGG(T=662,N=1157)	Tumor	-3.6259	TCGA-28-5216-01
GBMLGG(T=662,N=1157)	Tumor	-5.0116	TCGA-WY-A859-01
GBMLGG(T=662,N=1157)	Tumor	-2.6349	TCGA-WY-A85B-01
GBMLGG(T=662,N=1157)	Tumor	-4.2934	TCGA-S9-A6UB-01
GBMLGG(T=662,N=1157)	Tumor	-9.9658	TCGA-41-2572-01
GBMLGG(T=662,N=1157)	Tumor	-1.7322	TCGA-DU-7290-01
GBMLGG(T=662,N=1157)	Tumor	-3.3076	TCGA-P5-A5F6-01
GBMLGG(T=662,N=1157)	Tumor	-5.5735	TCGA-DU-6407-01
GBMLGG(T=662,N=1157)	Tumor	-3.3076	TCGA-02-0055-01
GBMLGG(T=662,N=1157)	Tumor	-2.8262	TCGA-HT-7601-01
GBMLGG(T=662,N=1157)	Tumor	0.7058	TCGA-32-2634-01
GBMLGG(T=662,N=1157)	Tumor	-2.8262	TCGA-DU-6403-01
GBMLGG(T=662,N=1157)	Tumor	-4.6082	TCGA-DB-A4XG-01
GBMLGG(T=662,N=1157)	Tumor	-6.5064	TCGA-DB-A64R-01
GBMLGG(T=662,N=1157)	Tumor	-5.0116	TCGA-HW-7487-01
GBMLGG(T=662,N=1157)	Tumor	-9.9658	TCGA-S9-A7J1-01
GBMLGG(T=662,N=1157)	Tumor	-6.5064	TCGA-FG-6689-01
GBMLGG(T=662,N=1157)	Tumor	-2.7274	TCGA-HT-8011-01
GBMLGG(T=662,N=1157)	Tumor	-0.5332	TCGA-E1-A7YJ-01
GBMLGG(T=662,N=1157)	Tumor	-1.5522	TCGA-06-5411-01
GBMLGG(T=662,N=1157)	Tumor	-4.035	TCGA-DB-5277-01
GBMLGG(T=662,N=1157)	Tumor	-3.458	TCGA-HT-7690-01
GBMLGG(T=662,N=1157)	Tumor	-4.2934	TCGA-TM-A84M-01
GBMLGG(T=662,N=1157)	Tumor	-3.816	TCGA-HT-8105-01
GBMLGG(T=662,N=1157)	Tumor	-4.6082	TCGA-06-0744-01
GBMLGG(T=662,N=1157)	Tumor	-1.4305	TCGA-76-4928-01
GBMLGG(T=662,N=1157)	Tumor	-1.9942	TCGA-06-0644-01
GBMLGG(T=662,N=1157)	Tumor	-1.7322	TCGA-E1-A7YY-01
GBMLGG(T=662,N=1157)	Tumor	-3.458	TCGA-HT-A619-01
GBMLGG(T=662,N=1157)	Tumor	-5.5735	TCGA-E1-5318-01
GBMLGG(T=662,N=1157)	Tumor	-2.2447	TCGA-P5-A737-01
GBMLGG(T=662,N=1157)	Tumor	-9.9658	TCGA-14-0871-01
GBMLGG(T=662,N=1157)	Tumor	-4.2934	TCGA-RY-A83Y-01
GBMLGG(T=662,N=1157)	Tumor	-2.3147	TCGA-08-0386-01
GBMLGG(T=662,N=1157)	Tumor	-5.5735	TCGA-HT-8564-01
GBMLGG(T=662,N=1157)	Tumor	-5.0116	TCGA-HT-7686-01
GBMLGG(T=662,N=1157)	Tumor	-2.8262	TCGA-E1-A7YM-01
GBMLGG(T=662,N=1157)	Tumor	-1.4699	TCGA-DU-7301-01
GBMLGG(T=662,N=1157)	Tumor	-2.114	TCGA-S9-A6UA-01
GBMLGG(T=662,N=1157)	Tumor	-1.8314	TCGA-32-2632-01
GBMLGG(T=662,N=1157)	Tumor	-9.9658	TCGA-TM-A84G-01
GBMLGG(T=662,N=1157)	Tumor	-5.0116	TCGA-VV-A829-01
GBMLGG(T=662,N=1157)	Tumor	-1.2828	TCGA-DH-A66B-01
GBMLGG(T=662,N=1157)	Tumor	-2.4659	TCGA-HT-A5R7-01
GBMLGG(T=662,N=1157)	Tumor	-9.9658	TCGA-CS-5394-01
GBMLGG(T=662,N=1157)	Tumor	-9.9658	TCGA-HT-A61A-01
GBMLGG(T=662,N=1157)	Tumor	-6.5064	TCGA-HT-7877-01
GBMLGG(T=662,N=1157)	Tumor	-1.7322	TCGA-HT-A618-01
GBMLGG(T=662,N=1157)	Tumor	-3.6259	TCGA-06-0882-01
GBMLGG(T=662,N=1157)	Tumor	-6.5064	TCGA-DU-6542-01
GBMLGG(T=662,N=1157)	Tumor	-3.6259	TCGA-41-4097-01
GBMLGG(T=662,N=1157)	Tumor	-2.5479	TCGA-QH-A6CS-01
GBMLGG(T=662,N=1157)	Tumor	-9.9658	TCGA-W9-A837-01
GBMLGG(T=662,N=1157)	Tumor	-4.6082	TCGA-16-1045-01
GBMLGG(T=662,N=1157)	Tumor	-5.0116	TCGA-DU-7306-01
GBMLGG(T=662,N=1157)	Tumor	-4.2934	TCGA-VM-A8CH-01
GBMLGG(T=662,N=1157)	Tumor	-6.5064	TCGA-QH-A6X9-01
GBMLGG(T=662,N=1157)	Tumor	-6.5064	TCGA-E1-5311-01
GBMLGG(T=662,N=1157)	Tumor	-2.1779	TCGA-S9-A6U0-01
GBMLGG(T=662,N=1157)	Tumor	-9.9658	TCGA-QH-A6CZ-01
GBMLGG(T=662,N=1157)	Tumor	-3.1714	TCGA-HT-7611-01
GBMLGG(T=662,N=1157)	Tumor	-0.2498	TCGA-19-2625-01
GBMLGG(T=662,N=1157)	Tumor	-9.9658	TCGA-WH-A86K-01
GBMLGG(T=662,N=1157)	Tumor	-6.5064	TCGA-DH-5141-01
GBMLGG(T=662,N=1157)	Tumor	-2.2447	TCGA-FG-A60L-01
GBMLGG(T=662,N=1157)	Tumor	-1.685	TCGA-DB-5280-01
GBMLGG(T=662,N=1157)	Tumor	-2.7274	TCGA-S9-A7IX-01
GBMLGG(T=662,N=1157)	Tumor	-4.2934	TCGA-HT-A5RC-01
GBMLGG(T=662,N=1157)	Tumor	-3.0469	TCGA-FG-5965-01
GBMLGG(T=662,N=1157)	Tumor	-2.9324	TCGA-FG-7634-01
GBMLGG(T=662,N=1157)	Tumor	-3.816	TCGA-S9-A6TU-01
GBMLGG(T=662,N=1157)	Tumor	-1.5522	TCGA-27-1834-01
GBMLGG(T=662,N=1157)	Tumor	-0.8863	TCGA-DU-7007-01
GBMLGG(T=662,N=1157)	Tumor	-5.5735	TCGA-HW-7490-01
GBMLGG(T=662,N=1157)	Tumor	-3.458	TCGA-TM-A7C3-01
GBMLGG(T=662,N=1157)	Tumor	-5.5735	TCGA-CS-6668-01
GBMLGG(T=662,N=1157)	Tumor	-0.7834	TCGA-S9-A6WG-01
GBMLGG(T=662,N=1157)	Tumor	0.03	TCGA-DU-8165-01
GBMLGG(T=662,N=1157)	Tumor	-6.5064	TCGA-HT-7692-01
GBMLGG(T=662,N=1157)	Tumor	-4.6082	TCGA-TQ-A7RM-01
GBMLGG(T=662,N=1157)	Tumor	-2.7274	TCGA-HT-7607-01
GBMLGG(T=662,N=1157)	Tumor	-6.5064	TCGA-HT-7880-01
GBMLGG(T=662,N=1157)	Tumor	-0.9406	TCGA-DU-8161-01
GBMLGG(T=662,N=1157)	Tumor	-5.0116	TCGA-HT-7467-01
GBMLGG(T=662,N=1157)	Tumor	-1.9379	TCGA-VM-A8CD-01
GBMLGG(T=662,N=1157)	Tumor	-4.035	TCGA-DU-6401-01
GBMLGG(T=662,N=1157)	Tumor	-5.0116	TCGA-DU-6396-01
GBMLGG(T=662,N=1157)	Tumor	-3.3076	TCGA-HT-A74H-01
GBMLGG(T=662,N=1157)	Tumor	-5.0116	TCGA-41-2571-01
GBMLGG(T=662,N=1157)	Tumor	-4.035	TCGA-19-4065-01
GBMLGG(T=662,N=1157)	Tumor	-2.0529	TCGA-14-0781-01
GBMLGG(T=662,N=1157)	Tumor	-2.6349	TCGA-HT-7483-01
GBMLGG(T=662,N=1157)	Tumor	-9.9658	TCGA-HT-7620-01
GBMLGG(T=662,N=1157)	Tumor	-9.9658	TCGA-HT-7480-01
GBMLGG(T=662,N=1157)	Tumor	-1.8836	TCGA-06-0157-01
GBMLGG(T=662,N=1157)	Tumor	-0.9686	TCGA-S9-A7J0-01
GBMLGG(T=662,N=1157)	Tumor	-2.1779	TCGA-12-3653-01
GBMLGG(T=662,N=1157)	Tumor	-3.6259	TCGA-P5-A736-01
GBMLGG(T=662,N=1157)	Tumor	-2.5479	TCGA-TM-A84Q-01
GBMLGG(T=662,N=1157)	Tumor	-4.2934	TCGA-76-4926-01
GBMLGG(T=662,N=1157)	Tumor	-2.3884	TCGA-26-5133-01
GBMLGG(T=662,N=1157)	Tumor	-2.8262	TCGA-06-2562-01
GBMLGG(T=662,N=1157)	Tumor	-3.6259	TCGA-RY-A847-01
GBMLGG(T=662,N=1157)	Tumor	-4.6082	TCGA-E1-A7YV-01
GBMLGG(T=662,N=1157)	Tumor	-2.9324	TCGA-TQ-A7RQ-01
GBMLGG(T=662,N=1157)	Tumor	-1.2481	TCGA-FG-8191-01
GBMLGG(T=662,N=1157)	Tumor	-4.6082	TCGA-E1-A7YW-01
GBMLGG(T=662,N=1157)	Tumor	-4.6082	TCGA-DB-5278-01
GBMLGG(T=662,N=1157)	Tumor	-9.9658	TCGA-E1-A7YS-01
GBMLGG(T=662,N=1157)	Tumor	-3.816	TCGA-HT-7695-01
GBMLGG(T=662,N=1157)	Tumor	-5.5735	TCGA-DU-A7TC-01
GBMLGG(T=662,N=1157)	Tumor	-3.458	TCGA-HW-7491-01
GBMLGG(T=662,N=1157)	Tumor	-9.9658	TCGA-DB-A4X9-01
GBMLGG(T=662,N=1157)	Tumor	-2.8262	TCGA-HT-A614-01
GBMLGG(T=662,N=1157)	Tumor	-5.5735	TCGA-TQ-A7RI-01
GBMLGG(T=662,N=1157)	Tumor	-2.3147	TCGA-CS-6188-01
GBMLGG(T=662,N=1157)	Tumor	-6.5064	TCGA-QH-A86X-01
GBMLGG(T=662,N=1157)	Tumor	-9.9658	TCGA-DU-A76R-01
GBMLGG(T=662,N=1157)	Tumor	-5.0116	TCGA-DH-5144-01
GBMLGG(T=662,N=1157)	Tumor	-1.9942	TCGA-DU-8168-01
GBMLGG(T=662,N=1157)	Tumor	-6.5064	TCGA-VM-A8C8-01
GBMLGG(T=662,N=1157)	Tumor	-1.3183	TCGA-HT-7882-01
GBMLGG(T=662,N=1157)	Tumor	-5.5735	TCGA-DU-6399-01
GBMLGG(T=662,N=1157)	Tumor	-3.0469	TCGA-S9-A7R7-01
GBMLGG(T=662,N=1157)	Tumor	-3.3076	TCGA-41-5651-01
GBMLGG(T=662,N=1157)	Tumor	-4.6082	TCGA-E1-A7Z2-01
GBMLGG(T=662,N=1157)	Tumor	-1.2481	TCGA-DU-A5TP-01
GBMLGG(T=662,N=1157)	Tumor	-2.5479	TCGA-06-0210-01
GBMLGG(T=662,N=1157)	Tumor	-5.5735	TCGA-FG-8187-01
GBMLGG(T=662,N=1157)	Tumor	-3.816	TCGA-19-2624-01
GBMLGG(T=662,N=1157)	Tumor	-2.9324	TCGA-IK-8125-01
GBMLGG(T=662,N=1157)	Tumor	-3.458	TCGA-19-5960-01
GBMLGG(T=662,N=1157)	Tumor	-4.2934	TCGA-CS-6666-01
GBMLGG(T=662,N=1157)	Tumor	-5.5735	TCGA-06-0686-01
GBMLGG(T=662,N=1157)	Tumor	-4.6082	TCGA-TM-A7CF-01
GBMLGG(T=662,N=1157)	Tumor	-9.9658	TCGA-DH-A7US-01
GBMLGG(T=662,N=1157)	Tumor	-2.7274	TCGA-DU-7013-01
GBMLGG(T=662,N=1157)	Tumor	-9.9658	TCGA-E1-A7Z6-01
GBMLGG(T=662,N=1157)	Tumor	-1.685	TCGA-HT-7857-01
GBMLGG(T=662,N=1157)	Tumor	-5.0116	TCGA-E1-5319-01
GBMLGG(T=662,N=1157)	Tumor	-3.3076	TCGA-DU-A5TS-01
GBMLGG(T=662,N=1157)	Tumor	-9.9658	TCGA-HT-7856-01
GBMLGG(T=662,N=1157)	Tumor	-3.3076	TCGA-DU-6392-01
GBMLGG(T=662,N=1157)	Tumor	-9.9658	TCGA-QH-A6CU-01
GBMLGG(T=662,N=1157)	Tumor	-1.7322	TCGA-DU-6404-01
GBMLGG(T=662,N=1157)	Tumor	-6.5064	TCGA-VW-A8FI-01
GBMLGG(T=662,N=1157)	Tumor	-5.5735	TCGA-P5-A5EZ-01
GBMLGG(T=662,N=1157)	Tumor	-2.3147	TCGA-S9-A89Z-01
GBMLGG(T=662,N=1157)	Tumor	-2.3147	TCGA-FG-5963-01
GBMLGG(T=662,N=1157)	Tumor	-3.0469	TCGA-S9-A7IQ-01
GBMLGG(T=662,N=1157)	Tumor	-1.5105	TCGA-S9-A89V-01
GBMLGG(T=662,N=1157)	Tumor	-0.8599	TCGA-DB-A64W-01
GBMLGG(T=662,N=1157)	Tumor	-4.2934	TCGA-FG-A4MX-01
GBMLGG(T=662,N=1157)	Tumor	-9.9658	TCGA-P5-A72Z-01
GBMLGG(T=662,N=1157)	Tumor	-3.6259	TCGA-06-2563-01
GBMLGG(T=662,N=1157)	Tumor	-4.6082	TCGA-S9-A6U1-01
GBMLGG(T=662,N=1157)	Tumor	-2.5479	TCGA-15-1444-01
GBMLGG(T=662,N=1157)	Tumor	-3.816	TCGA-32-4213-01
GBMLGG(T=662,N=1157)	Tumor	-5.5735	TCGA-HT-7881-01
GBMLGG(T=662,N=1157)	Tumor	-6.5064	TCGA-15-0742-01
GBMLGG(T=662,N=1157)	Tumor	-4.035	TCGA-06-0187-01
GBMLGG(T=662,N=1157)	Tumor	-2.8262	TCGA-19-1390-01
GBMLGG(T=662,N=1157)	Tumor	-3.1714	TCGA-QH-A65V-01
GBMLGG(T=662,N=1157)	Tumor	-2.8262	TCGA-DU-A7TG-01
GBMLGG(T=662,N=1157)	Tumor	-5.5735	TCGA-TQ-A7RV-01
GBMLGG(T=662,N=1157)	Tumor	-1.7322	TCGA-DU-5874-01
GBMLGG(T=662,N=1157)	Tumor	-3.458	TCGA-QH-A6X4-01
GBMLGG(T=662,N=1157)	Tumor	-2.6349	TCGA-VM-A8CB-01
GBMLGG(T=662,N=1157)	Tumor	-5.5735	TCGA-DH-A66F-01
GBMLGG(T=662,N=1157)	Tumor	-5.0116	TCGA-HT-7694-01
GBMLGG(T=662,N=1157)	Tumor	-1.4305	TCGA-HT-7471-01
GBMLGG(T=662,N=1157)	Tumor	-4.035	TCGA-HT-7608-01
GBMLGG(T=662,N=1157)	Tumor	-2.9324	TCGA-CS-6290-01
GBMLGG(T=662,N=1157)	Tumor	-4.2934	TCGA-DB-A4XD-01
GBMLGG(T=662,N=1157)	Tumor	-2.3884	TCGA-TQ-A7RK-01
GBMLGG(T=662,N=1157)	Tumor	-4.035	TCGA-HT-7475-01
GBMLGG(T=662,N=1157)	Tumor	-4.035	TCGA-TQ-A7RO-01
GBMLGG(T=662,N=1157)	Tumor	-9.9658	TCGA-HT-7902-01
GBMLGG(T=662,N=1157)	Tumor	-4.035	TCGA-FG-A711-01
GBMLGG(T=662,N=1157)	Tumor	0.434	TCGA-06-2557-01
GBMLGG(T=662,N=1157)	Tumor	-2.6349	TCGA-DB-5276-01
GBMLGG(T=662,N=1157)	Tumor	-9.9658	TCGA-P5-A730-01
GBMLGG(T=662,N=1157)	Tumor	-6.5064	TCGA-HT-A74O-01
GBMLGG(T=662,N=1157)	Tumor	-9.9658	TCGA-HT-A74J-01
GBMLGG(T=662,N=1157)	Tumor	-6.5064	TCGA-DU-5855-01
GBMLGG(T=662,N=1157)	Tumor	-1.8314	TCGA-06-0878-01
GBMLGG(T=662,N=1157)	Tumor	-4.035	TCGA-DH-A669-01
GBMLGG(T=662,N=1157)	Tumor	-3.458	TCGA-HT-A617-01
GBMLGG(T=662,N=1157)	Tumor	1.2696	TCGA-06-2567-01
GBMLGG(T=662,N=1157)	Tumor	-1.6394	TCGA-32-2616-01
GBMLGG(T=662,N=1157)	Tumor	-2.9324	TCGA-28-5208-01
GBMLGG(T=662,N=1157)	Tumor	-4.035	TCGA-28-2514-01
GBMLGG(T=662,N=1157)	Tumor	-2.3884	TCGA-06-1804-01
GBMLGG(T=662,N=1157)	Tumor	-3.6259	TCGA-QH-A6CX-01
GBMLGG(T=662,N=1157)	Tumor	-3.458	TCGA-14-2554-01
GBMLGG(T=662,N=1157)	Tumor	-5.5735	TCGA-P5-A5F4-01
GBMLGG(T=662,N=1157)	Tumor	-2.3884	TCGA-DU-A5TU-01
GBMLGG(T=662,N=1157)	Tumor	-6.5064	TCGA-DU-A76K-01
GBMLGG(T=662,N=1157)	Tumor	-5.5735	TCGA-HT-7609-01
GBMLGG(T=662,N=1157)	Tumor	-3.0469	TCGA-TQ-A7RR-01
GBMLGG(T=662,N=1157)	Tumor	-3.816	TCGA-DH-A66D-01
GBMLGG(T=662,N=1157)	Tumor	-4.035	TCGA-DH-A7UV-01
GBMLGG(T=662,N=1157)	Tumor	-4.035	TCGA-02-2485-01
GBMLGG(T=662,N=1157)	Tumor	-3.1714	TCGA-06-5858-01
GBMLGG(T=662,N=1157)	Tumor	-5.5735	TCGA-FG-6690-01
GBMLGG(T=662,N=1157)	Tumor	-4.2934	TCGA-DB-A4XA-01
GBMLGG(T=662,N=1157)	Tumor	-5.5735	TCGA-DU-8167-01
GBMLGG(T=662,N=1157)	Tumor	-4.6082	TCGA-QH-A65X-01
GBMLGG(T=662,N=1157)	Tumor	-2.8262	TCGA-06-0178-01
GBMLGG(T=662,N=1157)	Tumor	-4.035	TCGA-P5-A780-01
GBMLGG(T=662,N=1157)	Tumor	-3.816	TCGA-E1-5302-01
GBMLGG(T=662,N=1157)	Tumor	-2.3147	TCGA-14-1823-01
GBMLGG(T=662,N=1157)	Tumor	-6.5064	TCGA-HW-A5KJ-01
GBMLGG(T=662,N=1157)	Tumor	-9.9658	TCGA-FG-7636-01
GBMLGG(T=662,N=1157)	Tumor	1.2696	TCGA-DU-5847-01
GBMLGG(T=662,N=1157)	Tumor	-2.3147	TCGA-28-2509-01
GBMLGG(T=662,N=1157)	Tumor	-3.6259	TCGA-DU-6406-01
GBMLGG(T=662,N=1157)	Tumor	-2.8262	TCGA-06-2558-01
GBMLGG(T=662,N=1157)	Tumor	-3.816	TCGA-06-0745-01
GBMLGG(T=662,N=1157)	Tumor	-2.5479	TCGA-TM-A84B-01
GBMLGG(T=662,N=1157)	Tumor	-6.5064	TCGA-DU-A76O-01
GBMLGG(T=662,N=1157)	Tumor	-5.5735	TCGA-CS-4944-01
GBMLGG(T=662,N=1157)	Tumor	-5.0116	TCGA-HT-7603-01
GBMLGG(T=662,N=1157)	Normal	-2.9324	GTEX-13QIC-0011-R1a-SM-5O9CJ
GBMLGG(T=662,N=1157)	Normal	-9.9658	GTEX-N7MS-2526-SM-26GMA
GBMLGG(T=662,N=1157)	Normal	-9.9658	GTEX-N7MS-2526-SM-26GMR
GBMLGG(T=662,N=1157)	Normal	-4.2934	GTEX-NPJ7-0011-R6a-SM-2I3G7
GBMLGG(T=662,N=1157)	Normal	-5.0116	GTEX-132Q8-3026-SM-5PNVG
GBMLGG(T=662,N=1157)	Normal	-2.6349	GTEX-NPJ7-2726-SM-2I3FT
GBMLGG(T=662,N=1157)	Normal	-1.8314	GTEX-13OVJ-0011-R9b-SM-5L3GD
GBMLGG(T=662,N=1157)	Normal	-9.9658	GTEX-XLM4-0011-R10A-SM-4AT5P
GBMLGG(T=662,N=1157)	Normal	-3.816	GTEX-12ZZZ-0011-R10a-SM-5P9HC
GBMLGG(T=662,N=1157)	Normal	-6.5064	GTEX-X4XY-0011-R8A-SM-46MVC
GBMLGG(T=662,N=1157)	Normal	-4.6082	GTEX-13QJC-0011-R6a-SM-5S2VI
GBMLGG(T=662,N=1157)	Normal	-4.2934	GTEX-ZUA1-0011-R8b-SM-51MST
GBMLGG(T=662,N=1157)	Normal	-9.9658	GTEX-13FHP-0011-R7b-SM-5LZYI
GBMLGG(T=662,N=1157)	Normal	-9.9658	GTEX-11EMC-3326-SM-5P9JH
GBMLGG(T=662,N=1157)	Normal	-4.2934	GTEX-13112-0011-R7b-SM-5DUVW
GBMLGG(T=662,N=1157)	Normal	-5.0116	GTEX-12WSA-0011-R5b-SM-5GU5I
GBMLGG(T=662,N=1157)	Normal	-9.9658	GTEX-ZF28-3026-SM-4WKHP
GBMLGG(T=662,N=1157)	Normal	-6.5064	GTEX-ZUA1-0011-R7b-SM-4YCDP
GBMLGG(T=662,N=1157)	Normal	-3.1714	GTEX-11ZVC-0011-R9a-SM-57WC5
GBMLGG(T=662,N=1157)	Normal	-4.2934	GTEX-WZTO-0011-R4A-SM-3NMC7
GBMLGG(T=662,N=1157)	Normal	-6.5064	GTEX-NPJ7-0011-R11A-SM-2I3E8
GBMLGG(T=662,N=1157)	Normal	-6.5064	GTEX-13OVL-0011-R6a-SM-5L3G4
GBMLGG(T=662,N=1157)	Normal	-9.9658	GTEX-13NYB-0011-R1b-SM-5KM4F
GBMLGG(T=662,N=1157)	Normal	-4.6082	GTEX-WHSE-0011-R8A-SM-3P5Z1
GBMLGG(T=662,N=1157)	Normal	-9.9658	GTEX-T6MN-0011-R4A-SM-32QPG
GBMLGG(T=662,N=1157)	Normal	-2.0529	GTEX-ZDXO-0011-R1a-SM-4WKF4
[truncated: 20,048 more rows]
