# Supplementary material for: Comprehensive pan-cancer analysis reveals the prognostic value and immunological role of SPIB
Source: Aging (Albany NY). 2022 Aug 14;14(15):6338–57. doi: 10.18632/aging.204225 (PMC9417235; doi:10.18632/aging.204225)
Supplement: Supplementary Table 2 [file aging-14-204225-s003.xlsx]

## Sheet: OS
Supplementary Table 2. Prognosis analysis.
CancerCode	pvalue	HR	Lower	Upper	Hazard Ratio(95%CI)
TCGA-GBMLGG(N=619)	1.2e-10	1.23341	1.1572	1.31464	1.23(1.16,1.31)
TCGA-KIPAN(N=855)	2.5e-06	1.17148	1.09785	1.25005	1.17(1.10,1.25)
TCGA-LGG(N=474)	0.00072	1.15715	1.06305	1.25957	1.16(1.06,1.26)
TCGA-UVM(N=74)	0.0044	1.31285	1.08629	1.58667	1.31(1.09,1.59)
TCGA-KIRP(N=276)	0.0052	1.25201	1.07561	1.45734	1.25(1.08,1.46)
TCGA-THYM(N=117)	0.02	1.47882	1.04597	2.09079	1.48(1.05,2.09)
TCGA-KIRC(N=515)	0.04	1.09332	1.00373	1.1909	1.09(1.00,1.19)
TCGA-GBM(N=144)	0.05	1.09868	1.0013	1.20553	1.10(1.00,1.21)
TCGA-TGCT(N=128)	0.13	2.23298	0.789955	6.312	2.23(0.79,6.31)
TARGET-NB(N=151)	0.25	1.06479	0.957608	1.18397	1.06(0.96,1.18)
TCGA-LIHC(N=341)	0.28	1.03248	0.974583	1.09382	1.03(0.97,1.09)
TCGA-BLCA(N=398)	0.31	1.02736	0.974924	1.08261	1.03(0.97,1.08)
TCGA-PCPG(N=170)	0.42	1.13264	0.835358	1.53571	1.13(0.84,1.54)
TCGA-THCA(N=501)	0.5	1.07327	0.872714	1.31991	1.07(0.87,1.32)
TCGA-PAAD(N=172)	0.57	1.02176	0.947824	1.10147	1.02(0.95,1.10)
TCGA-ESCA(N=175)	0.65	1.01988	0.937804	1.10915	1.02(0.94,1.11)
TCGA-LUSC(N=468)	0.7	1.01242	0.950202	1.07871	1.01(0.95,1.08)
TCGA-LAML(N=209)	0.7	1.01938	0.923985	1.12462	1.02(0.92,1.12)
TCGA-UCS(N=55)	0.73	1.03026	0.867876	1.22303	1.03(0.87,1.22)
TARGET-ALL-R(N=99)	0.81	1.01698	0.886298	1.16693	1.02(0.89,1.17)
TCGA-STAD(N=372)	0.84	1.00673	0.943714	1.07396	1.01(0.94,1.07)
TCGA-KICH(N=64)	0.85	1.02391	0.807768	1.29788	1.02(0.81,1.30)
TCGA-STES(N=547)	0.9	1.00313	0.955598	1.05303	1.00(0.96,1.05)
TCGA-MESO(N=84)	0.99	1.00101	0.890949	1.12468	1.00(0.89,1.12)
TCGA-SKCM(N=444)	0.0017	0.917477	0.869551	0.968045	0.92(0.87,0.97)
TCGA-CESC(N=273)	0.0032	0.861797	0.781346	0.950532	0.86(0.78,0.95)
TCGA-HNSC(N=509)	0.0044	0.93465	0.892431	0.978867	0.93(0.89,0.98)
TCGA-BRCA(N=1044)	0.0064	0.926981	0.87795	0.978751	0.93(0.88,0.98)
TARGET-LAML(N=142)	0.01	0.85431	0.757869	0.963022	0.85(0.76,0.96)
TCGA-LUAD(N=490)	0.01	0.901434	0.831894	0.976788	0.90(0.83,0.98)
TCGA-SKCM-M(N=347)	0.02	0.930925	0.878395	0.986597	0.93(0.88,0.99)
TCGA-READ(N=90)	0.03	0.834667	0.706921	0.985498	0.83(0.71,0.99)
TCGA-OV(N=407)	0.06	0.937686	0.876884	1.0027	0.94(0.88,1.00)
TCGA-SARC(N=254)	0.08	0.934966	0.866919	1.00835	0.93(0.87,1.01)
TCGA-COADREAD(N=368)	0.08	0.916575	0.83221	1.00949	0.92(0.83,1.01)
TCGA-SKCM-P(N=97)	0.33	0.926828	0.795989	1.07917	0.93(0.80,1.08)
TCGA-COAD(N=278)	0.34	0.947977	0.849964	1.05729	0.95(0.85,1.06)
TCGA-ACC(N=77)	0.35	0.940671	0.827925	1.06877	0.94(0.83,1.07)
TCGA-CHOL(N=33)	0.4	0.932281	0.792271	1.09703	0.93(0.79,1.10)
TARGET-ALL(N=86)	0.41	0.944284	0.823189	1.08319	0.94(0.82,1.08)
TCGA-UCEC(N=166)	0.53	0.947108	0.798288	1.12367	0.95(0.80,1.12)
TCGA-PRAD(N=492)	0.57	0.917152	0.682186	1.23305	0.92(0.68,1.23)
TARGET-WT(N=80)	0.66	0.956204	0.781156	1.17048	0.96(0.78,1.17)
TCGA-DLBC(N=44)	0.85	0.943742	0.508828	1.75039	0.94(0.51,1.75)

## Sheet: DSS
CancerCode	pvalue	HR	Lower	Upper	Hazard Ratio(95%CI)
TCGA-GBMLGG(N=598)	3.3e-10	1.24313	1.16169	1.33028	1.24(1.16,1.33)
TCGA-KIPAN(N=840)	2.3e-06	1.22803	1.13031	1.3342	1.23(1.13,1.33)
TCGA-THYM(N=117)	0.00051	2.35949	1.27924	4.35198	2.36(1.28,4.35)
TCGA-KIRP(N=272)	0.00065	1.37301	1.15664	1.62985	1.37(1.16,1.63)
TCGA-LGG(N=466)	0.0025	1.14397	1.04812	1.24859	1.14(1.05,1.25)
TCGA-KIRC(N=504)	0.0097	1.1569	1.03706	1.2906	1.16(1.04,1.29)
TCGA-UVM(N=74)	0.01	1.28504	1.05586	1.56396	1.29(1.06,1.56)
TCGA-GBM(N=131)	0.05	1.11269	1.00089	1.23697	1.11(1.00,1.24)
TCGA-TGCT(N=128)	0.15	2.17857	0.743286	6.38538	2.18(0.74,6.39)
TCGA-STAD(N=351)	0.27	1.04745	0.964307	1.13777	1.05(0.96,1.14)
TCGA-PCPG(N=170)	0.39	1.18484	0.803496	1.74716	1.18(0.80,1.75)
TCGA-BLCA(N=385)	0.58	1.01845	0.955273	1.08581	1.02(0.96,1.09)
TCGA-STES(N=524)	0.65	1.01423	0.95407	1.07818	1.01(0.95,1.08)
TCGA-COAD(N=263)	0.7	1.02997	0.884673	1.19912	1.03(0.88,1.20)
TCGA-PAAD(N=166)	0.76	1.01272	0.933903	1.09819	1.01(0.93,1.10)
TCGA-KICH(N=64)	0.77	1.04115	0.792484	1.36783	1.04(0.79,1.37)
TCGA-ESCA(N=173)	0.92	1.00513	0.907949	1.11271	1.01(0.91,1.11)
TCGA-HNSC(N=485)	0.0011	0.901532	0.847989	0.958456	0.90(0.85,0.96)
TCGA-SKCM(N=438)	0.0017	0.912681	0.86199	0.966354	0.91(0.86,0.97)
TCGA-LUAD(N=457)	0.0033	0.861094	0.779231	0.951556	0.86(0.78,0.95)
TCGA-CESC(N=269)	0.0051	0.854497	0.766479	0.952622	0.85(0.77,0.95)
TCGA-READ(N=84)	0.0099	0.766936	0.614651	0.956951	0.77(0.61,0.96)
TCGA-SKCM-M(N=341)	0.01	0.922968	0.868381	0.980987	0.92(0.87,0.98)
TCGA-OV(N=378)	0.02	0.921131	0.857546	0.989431	0.92(0.86,0.99)
TCGA-BRCA(N=1025)	0.08	0.933343	0.864889	1.00721	0.93(0.86,1.01)
TCGA-ACC(N=75)	0.25	0.925622	0.811114	1.0563	0.93(0.81,1.06)
TCGA-SKCM-P(N=97)	0.27	0.905056	0.759327	1.07875	0.91(0.76,1.08)
TCGA-SARC(N=248)	0.31	0.956962	0.879838	1.04085	0.96(0.88,1.04)
TCGA-LUSC(N=418)	0.35	0.952053	0.85867	1.05559	0.95(0.86,1.06)
TCGA-THCA(N=495)	0.45	0.887381	0.650414	1.21068	0.89(0.65,1.21)
TCGA-UCEC(N=164)	0.53	0.938173	0.768322	1.14557	0.94(0.77,1.15)
TCGA-CHOL(N=32)	0.53	0.947541	0.801727	1.11988	0.95(0.80,1.12)
TCGA-COADREAD(N=347)	0.65	0.966777	0.836453	1.11741	0.97(0.84,1.12)
TCGA-DLBC(N=44)	0.65	0.835382	0.381316	1.83014	0.84(0.38,1.83)
TCGA-LIHC(N=333)	0.7	0.985991	0.918233	1.05875	0.99(0.92,1.06)
TCGA-PRAD(N=490)	0.72	0.925971	0.60777	1.41077	0.93(0.61,1.41)
TCGA-MESO(N=64)	0.78	0.97739	0.831721	1.14857	0.98(0.83,1.15)
TCGA-UCS(N=53)	0.99	0.998638	0.838982	1.18868	1.00(0.84,1.19)

## Sheet: DFI
CancerCode	pvalue	HR	Lower	Upper	Hazard Ratio(95%CI)
TCGA-KIRP(N=177)	0.05	1.20883	1.00461	1.45458	1.21(1.00,1.45)
TCGA-STAD(N=232)	0.07	1.11703	0.992344	1.25739	1.12(0.99,1.26)
TCGA-KIPAN(N=319)	0.13	1.11539	0.970846	1.28145	1.12(0.97,1.28)
TCGA-SARC(N=149)	0.3	1.05372	0.955462	1.16208	1.05(0.96,1.16)
TCGA-KICH(N=29)	0.53	1.22682	0.655505	2.29609	1.23(0.66,2.30)
TCGA-THCA(N=352)	0.61	1.04158	0.890401	1.21842	1.04(0.89,1.22)
TCGA-DLBC(N=26)	0.67	1.35248	0.331666	5.51517	1.35(0.33,5.52)
TCGA-STES(N=316)	0.79	1.01195	0.927113	1.10455	1.01(0.93,1.10)
TCGA-PAAD(N=68)	0.87	1.01097	0.890449	1.14781	1.01(0.89,1.15)
TCGA-OV(N=203)	0.01	0.875764	0.790683	0.970001	0.88(0.79,0.97)
TCGA-COADREAD(N=132)	0.02	0.814683	0.693361	0.957234	0.81(0.69,0.96)
TCGA-READ(N=29)	0.02	0.777958	0.611518	0.9897	0.78(0.61,0.99)
TCGA-BRCA(N=904)	0.09	0.933746	0.862771	1.01056	0.93(0.86,1.01)
TCGA-LIHC(N=294)	0.09	0.954807	0.904678	1.00771	0.95(0.90,1.01)
TCGA-LGG(N=126)	0.1	0.882627	0.75895	1.02646	0.88(0.76,1.03)
TCGA-GBMLGG(N=127)	0.1	0.881126	0.757923	1.02435	0.88(0.76,1.02)
TCGA-TGCT(N=101)	0.1	0.794313	0.605058	1.04276	0.79(0.61,1.04)
TCGA-COAD(N=103)	0.16	0.820828	0.621654	1.08382	0.82(0.62,1.08)
TCGA-LUAD(N=295)	0.21	0.927528	0.824093	1.04395	0.93(0.82,1.04)
TCGA-UCEC(N=115)	0.29	0.897108	0.735188	1.09469	0.90(0.74,1.09)
TCGA-ESCA(N=84)	0.4	0.943448	0.823642	1.08068	0.94(0.82,1.08)
TCGA-CHOL(N=23)	0.46	0.923975	0.749123	1.13964	0.92(0.75,1.14)
TCGA-MESO(N=14)	0.46	0.856394	0.564771	1.2986	0.86(0.56,1.30)
TCGA-BLCA(N=184)	0.48	0.955116	0.840367	1.08553	0.96(0.84,1.09)
TCGA-ACC(N=44)	0.5	0.934447	0.766972	1.13849	0.93(0.77,1.14)
TCGA-PRAD(N=337)	0.59	0.951073	0.793739	1.13959	0.95(0.79,1.14)
TCGA-UCS(N=26)	0.71	0.940982	0.679395	1.30329	0.94(0.68,1.30)
TCGA-CESC(N=171)	0.73	0.968837	0.806746	1.1635	0.97(0.81,1.16)
TCGA-LUSC(N=292)	0.79	0.984162	0.876908	1.10454	0.98(0.88,1.10)
TCGA-KIRC(N=113)	0.87	0.978917	0.753334	1.27205	0.98(0.75,1.27)
TCGA-HNSC(N=128)	0.98	0.997999	0.866109	1.14997	1.00(0.87,1.15)
TCGA-PCPG(N=152)	0.99	0.996837	0.708101	1.40331	1.00(0.71,1.40)

## Sheet: PFI
CancerCode	pvalue	HR	Lower	Upper	Hazard Ratio(95%CI)
TCGA-GBMLGG(N=616)	3.3e-08	1.15682	1.09845	1.21828	1.16(1.10,1.22)
TCGA-KIPAN(N=845)	4.3e-05	1.14709	1.07496	1.22405	1.15(1.07,1.22)
TCGA-UVM(N=73)	0.00061	1.3287	1.12727	1.56612	1.33(1.13,1.57)
TCGA-GBM(N=143)	0.005	1.13526	1.03891	1.24055	1.14(1.04,1.24)
TCGA-KIRP(N=273)	0.01	1.19345	1.04035	1.36907	1.19(1.04,1.37)
TCGA-LGG(N=472)	0.03	1.07169	1.00754	1.13993	1.07(1.01,1.14)
TCGA-KIRC(N=508)	0.07	1.08659	0.992921	1.1891	1.09(0.99,1.19)
TCGA-THYM(N=117)	0.09	1.21045	0.971657	1.50794	1.21(0.97,1.51)
TCGA-STAD(N=375)	0.15	1.05222	0.982646	1.12672	1.05(0.98,1.13)
TCGA-PAAD(N=171)	0.35	1.03423	0.963341	1.11034	1.03(0.96,1.11)
TCGA-PCPG(N=168)	0.52	1.05546	0.89647	1.24264	1.06(0.90,1.24)
TCGA-KICH(N=64)	0.54	1.07163	0.85824	1.33807	1.07(0.86,1.34)
TCGA-DLBC(N=43)	0.6	1.19009	0.622121	2.27659	1.19(0.62,2.28)
TCGA-SARC(N=250)	0.61	1.01722	0.952571	1.08625	1.02(0.95,1.09)
TCGA-BLCA(N=397)	0.76	1.00839	0.955102	1.06465	1.01(0.96,1.06)
TCGA-THCA(N=499)	0.84	1.01144	0.903478	1.13231	1.01(0.90,1.13)
TCGA-HNSC(N=508)	0.0018	0.92213	0.876853	0.969745	0.92(0.88,0.97)
TCGA-SKCM(N=434)	0.01	0.943862	0.901845	0.987836	0.94(0.90,0.99)
TCGA-BRCA(N=1043)	0.02	0.931549	0.879275	0.986932	0.93(0.88,0.99)
TCGA-OV(N=407)	0.02	0.93287	0.878037	0.991127	0.93(0.88,0.99)
TCGA-LUAD(N=486)	0.03	0.918887	0.851719	0.991352	0.92(0.85,0.99)
TCGA-SKCM-M(N=338)	0.05	0.951341	0.905892	0.99907	0.95(0.91,1.00)
TCGA-CESC(N=273)	0.07	0.911861	0.826688	1.00581	0.91(0.83,1.01)
TCGA-UCEC(N=166)	0.09	0.892288	0.783627	1.01602	0.89(0.78,1.02)
TCGA-ESCA(N=173)	0.18	0.948149	0.877975	1.02393	0.95(0.88,1.02)
TCGA-SKCM-P(N=96)	0.2	0.91634	0.802123	1.04682	0.92(0.80,1.05)
TCGA-LIHC(N=340)	0.23	0.970121	0.923289	1.01933	0.97(0.92,1.02)
TCGA-ACC(N=76)	0.24	0.938363	0.843501	1.04389	0.94(0.84,1.04)
TCGA-READ(N=88)	0.25	0.891722	0.734192	1.08305	0.89(0.73,1.08)
TCGA-CHOL(N=33)	0.26	0.919787	0.795319	1.06373	0.92(0.80,1.06)
TCGA-COADREAD(N=363)	0.3	0.952842	0.869125	1.04462	0.95(0.87,1.04)
TCGA-UCS(N=55)	0.32	0.922953	0.787558	1.08162	0.92(0.79,1.08)
TCGA-TGCT(N=126)	0.33	0.875714	0.670256	1.14415	0.88(0.67,1.14)
TCGA-MESO(N=82)	0.39	0.946348	0.834786	1.07282	0.95(0.83,1.07)
TCGA-COAD(N=275)	0.44	0.959653	0.864383	1.06542	0.96(0.86,1.07)
TCGA-STES(N=548)	0.48	0.982361	0.935288	1.0318	0.98(0.94,1.03)
TCGA-PRAD(N=492)	0.55	0.970611	0.881008	1.06933	0.97(0.88,1.07)
TCGA-LUSC(N=467)	0.72	0.986226	0.914024	1.06413	0.99(0.91,1.06)
