# Supplementary material for: Comprehensive pan-cancer analysis reveals the prognostic value and immunological role of SPIB
Source: Aging (Albany NY). 2022 Aug 14;14(15):6338–57. doi: 10.18632/aging.204225 (PMC9417235; doi:10.18632/aging.204225)
Supplement: Supplementary Table 3 [file aging-14-204225-s004.xlsx]

## Sheet: Immune cell infiltration
Supplementary Table 3. Immune cell infiltration.
cancer	infiltrates	rho	p	adj.p
ACC (n=79)	B cell memory_CIBERSORT	0.214475	0.0684378	0.111294
ACC (n=79)	B cell memory_CIBERSORT-ABS	0.21375	0.0693998	0.112794
ACC (n=79)	B cell memory_XCELL	0.134935	0.255038	0.341636
ACC (n=79)	B cell naive_CIBERSORT	-0.155476	0.189028	0.265398
ACC (n=79)	B cell naive_CIBERSORT-ABS	-0.0145644	0.902664	0.928241
ACC (n=79)	B cell naive_XCELL	0.0301509	0.800098	0.844891
ACC (n=79)	B cell plasma_CIBERSORT	-0.0312187	0.793173	0.838505
ACC (n=79)	B cell plasma_CIBERSORT-ABS	0.0838208	0.480781	0.575292
ACC (n=79)	B cell plasma_XCELL	0.14029	0.236486	0.320871
ACC (n=79)	B cell_EPIC	0.174605	0.139555	0.205156
ACC (n=79)	B cell_MCPCOUNTER	0.142633	0.228672	0.312043
ACC (n=79)	B cell_QUANTISEQ	-0.135223	0.254016	0.340469
ACC (n=79)	B cell_TIMER	0.0742324	0.532525	0.622908
ACC (n=79)	B cell_XCELL	0.153446	0.19494	0.272631
ACC (n=79)	Class-switched memory B cell_XCELL	0.374505	0.0010977	0.00259447
ACC (n=79)	Macrophage M0_CIBERSORT	0.0576218	0.628225	0.707988
ACC (n=79)	Macrophage M0_CIBERSORT-ABS	0.0627392	0.597977	0.679778
ACC (n=79)	Macrophage M1_CIBERSORT	0.263725	0.0241682	0.0441474
ACC (n=79)	Macrophage M1_CIBERSORT-ABS	0.310855	0.00743354	0.015212
ACC (n=79)	Macrophage M1_QUANTISEQ	0.128368	0.279106	0.369435
ACC (n=79)	Macrophage M1_XCELL	0.0451259	0.704618	0.771045
ACC (n=79)	Macrophage M2_CIBERSORT	-0.0363064	0.760406	0.816099
ACC (n=79)	Macrophage M2_CIBERSORT-ABS	0.256879	0.028246	0.0506449
ACC (n=79)	Macrophage M2_QUANTISEQ	0.175546	0.137401	0.202742
ACC (n=79)	Macrophage M2_TIDE	-0.258912	0.0269788	0.0486468
ACC (n=79)	Macrophage M2_XCELL	0.277307	0.0175394	0.0334123
ACC (n=79)	Macrophage_EPIC	0.079431	0.504133	0.595739
ACC (n=79)	Macrophage_TIMER	0.236336	0.0441127	0.0755031
ACC (n=79)	Macrophage_XCELL	0.107149	0.366909	0.465043
ACC (n=79)	Macrophage/Monocyte_MCPCOUNTER	0.292182	0.0121308	0.0240187
ACC (n=79)	Myeloid dendritic cell activated_CIBERSORT	-0.274808	0.0186263	0.0351326
ACC (n=79)	Myeloid dendritic cell activated_CIBERSORT-ABS	-0.244108	0.0374101	0.0651213
ACC (n=79)	Myeloid dendritic cell activated_XCELL	0.170918	0.148238	0.215735
ACC (n=79)	Myeloid dendritic cell resting_CIBERSORT	-0.0385357	0.746175	0.803638
ACC (n=79)	Myeloid dendritic cell resting_CIBERSORT-ABS	-0.0333496	0.779401	0.830377
ACC (n=79)	Myeloid dendritic cell_MCPCOUNTER	0.289547	0.0129673	0.0254813
ACC (n=79)	Myeloid dendritic cell_QUANTISEQ	-0.214843	0.067953	0.110694
ACC (n=79)	Myeloid dendritic cell_TIMER	0.342809	0.00298839	0.00659055
ACC (n=79)	Myeloid dendritic cell_XCELL	0.300599	0.00976477	0.0196048
ACC (n=79)	Neutrophil_CIBERSORT	-0.00783238	0.947564	0.964041
ACC (n=79)	Neutrophil_CIBERSORT-ABS	0.0081667	0.945329	0.963065
ACC (n=79)	Neutrophil_MCPCOUNTER	0.0475857	0.689317	0.761863
ACC (n=79)	Neutrophil_QUANTISEQ	0.0334732	0.778605	0.829846
ACC (n=79)	Neutrophil_TIMER	0.158088	0.181611	0.257116
ACC (n=79)	Neutrophil_XCELL	-0.151213	0.201596	0.280706
ACC (n=79)	Plasmacytoid dendritic cell_XCELL	0.0764876	0.520111	0.61088
ACC (n=79)	T cell CD4+ (non-regulatory)_QUANTISEQ	-0.085863	0.470118	0.564417
ACC (n=79)	T cell CD4+ (non-regulatory)_XCELL	-0.0431368	0.717077	0.780749
ACC (n=79)	T cell CD4+ central memory_XCELL	0.0252516	0.832061	0.8719
ACC (n=79)	T cell CD4+ effector memory_XCELL	0.0742584	0.53238	0.622908
ACC (n=79)	T cell CD4+ memory activated_CIBERSORT	0.00464233	0.968907	0.980118
ACC (n=79)	T cell CD4+ memory activated_CIBERSORT-ABS	0.00464233	0.968907	0.980118
ACC (n=79)	T cell CD4+ memory resting_CIBERSORT	-0.0676662	0.569482	0.656232
ACC (n=79)	T cell CD4+ memory resting_CIBERSORT-ABS	0.197427	0.0940871	0.146522
ACC (n=79)	T cell CD4+ memory_XCELL	0.159906	0.176577	0.251489
ACC (n=79)	T cell CD4+ naive_CIBERSORT	-0.00690047	0.953796	0.968662
ACC (n=79)	T cell CD4+ naive_CIBERSORT-ABS	-0.0116279	0.92222	0.943277
ACC (n=79)	T cell CD4+ naive_XCELL	0.110542	0.351838	0.4488
ACC (n=79)	T cell CD4+ Th1_XCELL	-0.139971	0.237566	0.322034
ACC (n=79)	T cell CD4+ Th2_XCELL	0.0242872	0.838386	0.876605
ACC (n=79)	T cell CD4+_EPIC	-0.132924	0.262251	0.349709
ACC (n=79)	T cell CD4+_TIMER	0.142247	0.229947	0.313485
ACC (n=79)	T cell CD8+ central memory_XCELL	0.228828	0.0515011	0.0867021
ACC (n=79)	T cell CD8+ effector memory_XCELL	0.210265	0.0741773	0.119656
ACC (n=79)	T cell CD8+ naive_XCELL	-0.0648362	0.585772	0.669883
ACC (n=79)	T cell CD8+_CIBERSORT	0.0932101	0.432834	0.530995
ACC (n=79)	T cell CD8+_CIBERSORT-ABS	0.220988	0.0602668	0.0993734
ACC (n=79)	T cell CD8+_EPIC	0.0152963	0.897798	0.926067
ACC (n=79)	T cell CD8+_MCPCOUNTER	0.210084	0.0744322	0.119886
ACC (n=79)	T cell CD8+_QUANTISEQ	0.257197	0.0280444	0.0503465
ACC (n=79)	T cell CD8+_TIMER	0.0833235	0.483397	0.576978
ACC (n=79)	T cell CD8+_XCELL	0.185627	0.115875	0.175126
BLCA (n=408)	B cell memory_CIBERSORT	0.287133	2.04735e-08	8.58149e-08
BLCA (n=408)	B cell memory_CIBERSORT-ABS	0.331146	7.2395e-11	3.73975e-10
BLCA (n=408)	B cell memory_XCELL	0.524068	2.38734e-27	3.56485e-26
BLCA (n=408)	B cell naive_CIBERSORT	0.289862	1.48182e-08	6.27531e-08
BLCA (n=408)	B cell naive_CIBERSORT-ABS	0.338017	2.75218e-11	1.45046e-10
BLCA (n=408)	B cell naive_XCELL	0.362255	7.46637e-13	4.5256e-12
BLCA (n=408)	B cell plasma_CIBERSORT	-0.126395	0.0152595	0.0294606
BLCA (n=408)	B cell plasma_CIBERSORT-ABS	0.138072	0.00799246	0.0162513
BLCA (n=408)	B cell plasma_XCELL	0.279767	4.8159e-08	1.97245e-07
BLCA (n=408)	B cell_EPIC	0.540331	2.78811e-29	4.62052e-28
BLCA (n=408)	B cell_MCPCOUNTER	0.599453	2.83434e-37	6.55327e-36
BLCA (n=408)	B cell_QUANTISEQ	0.55093	1.34289e-30	2.33338e-29
BLCA (n=408)	B cell_TIMER	0.209502	5.11494e-05	0.000147234
BLCA (n=408)	B cell_XCELL	0.544836	7.78161e-30	1.32011e-28
BLCA (n=408)	Class-switched memory B cell_XCELL	0.364988	4.87473e-13	2.98629e-12
BLCA (n=408)	Macrophage M0_CIBERSORT	-0.0347213	0.506687	0.597562
BLCA (n=408)	Macrophage M0_CIBERSORT-ABS	0.0711053	0.173476	0.247564
BLCA (n=408)	Macrophage M1_CIBERSORT	0.222277	1.68149e-05	5.25145e-05
BLCA (n=408)	Macrophage M1_CIBERSORT-ABS	0.349267	5.36124e-12	3.03169e-11
BLCA (n=408)	Macrophage M1_QUANTISEQ	0.174036	0.000799853	0.00191898
BLCA (n=408)	Macrophage M1_XCELL	0.244725	2.02298e-06	7.0387e-06
BLCA (n=408)	Macrophage M2_CIBERSORT	-0.0468122	0.370547	0.467999
BLCA (n=408)	Macrophage M2_CIBERSORT-ABS	0.358211	1.39278e-12	8.25021e-12
BLCA (n=408)	Macrophage M2_QUANTISEQ	0.263135	3.03678e-07	1.15317e-06
BLCA (n=408)	Macrophage M2_TIDE	-0.113548	0.0294155	0.0525774
BLCA (n=408)	Macrophage M2_XCELL	0.177057	0.000644912	0.00156294
BLCA (n=408)	Macrophage_EPIC	0.308521	1.48067e-09	6.91382e-09
BLCA (n=408)	Macrophage_TIMER	0.0118022	0.821479	0.863442
BLCA (n=408)	Macrophage_XCELL	0.200096	0.000111274	0.000302117
BLCA (n=408)	Macrophage/Monocyte_MCPCOUNTER	0.211368	4.36561e-05	0.000126939
BLCA (n=408)	Myeloid dendritic cell activated_CIBERSORT	-0.196049	0.000153785	0.00040938
BLCA (n=408)	Myeloid dendritic cell activated_CIBERSORT-ABS	-0.0769736	0.140543	0.206316
BLCA (n=408)	Myeloid dendritic cell activated_XCELL	0.481008	1.0479e-22	1.23635e-21
BLCA (n=408)	Myeloid dendritic cell resting_CIBERSORT	-0.0289329	0.580087	0.66631
BLCA (n=408)	Myeloid dendritic cell resting_CIBERSORT-ABS	0.0221781	0.671526	0.747385
BLCA (n=408)	Myeloid dendritic cell_MCPCOUNTER	0.454343	3.82356e-20	3.98624e-19
BLCA (n=408)	Myeloid dendritic cell_QUANTISEQ	0.041889	0.423023	0.520666
BLCA (n=408)	Myeloid dendritic cell_TIMER	0.100031	0.0552104	0.0921351
BLCA (n=408)	Myeloid dendritic cell_XCELL	0.439838	7.66629e-19	7.18277e-18
BLCA (n=408)	Neutrophil_CIBERSORT	-0.084661	0.104918	0.160426
BLCA (n=408)	Neutrophil_CIBERSORT-ABS	-0.0437016	0.403217	0.501529
BLCA (n=408)	Neutrophil_MCPCOUNTER	-0.0519056	0.320708	0.416427
BLCA (n=408)	Neutrophil_QUANTISEQ	0.0180746	0.729659	0.790303
BLCA (n=408)	Neutrophil_TIMER	0.223015	1.57363e-05	4.9361e-05
BLCA (n=408)	Neutrophil_XCELL	-0.0513461	0.325959	0.421907
BLCA (n=408)	Plasmacytoid dendritic cell_XCELL	0.288459	1.7506e-08	7.39172e-08
BLCA (n=408)	T cell CD4+ (non-regulatory)_QUANTISEQ	-0.109296	0.0360985	0.0630678
BLCA (n=408)	T cell CD4+ (non-regulatory)_XCELL	0.0470422	0.368198	0.46647
BLCA (n=408)	T cell CD4+ central memory_XCELL	-0.0537601	0.303699	0.39722
BLCA (n=408)	T cell CD4+ effector memory_XCELL	0.121022	0.0202195	0.037765
BLCA (n=408)	T cell CD4+ memory activated_CIBERSORT	-0.0193707	0.71111	0.775534
BLCA (n=408)	T cell CD4+ memory activated_CIBERSORT-ABS	0.00234511	0.96424	0.977192
BLCA (n=408)	T cell CD4+ memory resting_CIBERSORT	0.159527	0.00214397	0.00483237
BLCA (n=408)	T cell CD4+ memory resting_CIBERSORT-ABS	0.300547	4.04293e-09	1.80546e-08
BLCA (n=408)	T cell CD4+ memory_XCELL	0.0627823	0.229572	0.313123
BLCA (n=408)	T cell CD4+ naive_CIBERSORT	-0.327267	1.23661e-10	6.27499e-10
BLCA (n=408)	T cell CD4+ naive_CIBERSORT-ABS	-0.322831	2.26049e-10	1.11546e-09
BLCA (n=408)	T cell CD4+ naive_XCELL	0.156649	0.00258291	0.00576728
BLCA (n=408)	T cell CD4+ Th1_XCELL	-0.0252229	0.6296	0.709259
BLCA (n=408)	T cell CD4+ Th2_XCELL	0.062701	0.230177	0.313562
BLCA (n=408)	T cell CD4+_EPIC	-0.0893901	0.0868239	0.136997
BLCA (n=408)	T cell CD4+_TIMER	0.295394	7.61471e-09	3.28786e-08
BLCA (n=408)	T cell CD8+ central memory_XCELL	0.317342	4.70321e-10	2.28157e-09
BLCA (n=408)	T cell CD8+ effector memory_XCELL	0.118382	0.0231335	0.042488
BLCA (n=408)	T cell CD8+ naive_XCELL	-0.0242521	0.642847	0.721924
BLCA (n=408)	T cell CD8+_CIBERSORT	0.221949	1.73162e-05	5.40084e-05
BLCA (n=408)	T cell CD8+_CIBERSORT-ABS	0.444234	3.13673e-19	3.03818e-18
BLCA (n=408)	T cell CD8+_EPIC	0.0631673	0.226723	0.309973
BLCA (n=408)	T cell CD8+_MCPCOUNTER	0.360233	1.02094e-12	6.11069e-12
BLCA (n=408)	T cell CD8+_QUANTISEQ	0.309191	1.35894e-09	6.36615e-09
BLCA (n=408)	T cell CD8+_TIMER	-0.0594717	0.255124	0.341636
BLCA (n=408)	T cell CD8+_XCELL	0.251436	1.0307e-06	3.71702e-06
BRCA (n=1100)	B cell memory_CIBERSORT	0.289289	1.29148e-20	1.39198e-19
BRCA (n=1100)	B cell memory_CIBERSORT-ABS	0.310266	1.27104e-23	1.59828e-22
BRCA (n=1100)	B cell memory_XCELL	0.511183	2.82888e-67	2.70347e-65
BRCA (n=1100)	B cell naive_CIBERSORT	0.0833615	0.00855175	0.0173149
BRCA (n=1100)	B cell naive_CIBERSORT-ABS	0.310723	1.08643e-23	1.37822e-22
BRCA (n=1100)	B cell naive_XCELL	0.392645	5.48939e-38	1.33373e-36
BRCA (n=1100)	B cell plasma_CIBERSORT	-0.126485	6.36496e-05	0.000181576
BRCA (n=1100)	B cell plasma_CIBERSORT-ABS	0.0758386	0.0167816	0.0320753
BRCA (n=1100)	B cell plasma_XCELL	0.328103	2.2345e-26	3.2355e-25
BRCA (n=1100)	B cell_EPIC	0.62598	2.98872e-109	1.42811e-106
BRCA (n=1100)	B cell_MCPCOUNTER	0.631043	1.60557e-111	9.20636e-109
BRCA (n=1100)	B cell_QUANTISEQ	0.454606	7.48747e-52	3.1111e-50
BRCA (n=1100)	B cell_TIMER	0.184797	4.36997e-09	1.94848e-08
BRCA (n=1100)	B cell_XCELL	0.572128	1.71718e-87	3.78705e-85
BRCA (n=1100)	Class-switched memory B cell_XCELL	0.480351	1.6355e-58	9.01727e-57
BRCA (n=1100)	Macrophage M0_CIBERSORT	-0.00461384	0.884488	0.915792
BRCA (n=1100)	Macrophage M0_CIBERSORT-ABS	0.171204	5.60321e-08	2.27864e-07
BRCA (n=1100)	Macrophage M1_CIBERSORT	0.462673	7.04834e-54	3.25929e-52
BRCA (n=1100)	Macrophage M1_CIBERSORT-ABS	0.649372	4.2136e-120	4.0268e-117
BRCA (n=1100)	Macrophage M1_QUANTISEQ	0.147599	2.96504e-06	1.00482e-05
BRCA (n=1100)	Macrophage M1_XCELL	0.266954	1.1121e-17	9.4053e-17
BRCA (n=1100)	Macrophage M2_CIBERSORT	-0.515547	1.37176e-68	1.51263e-66
BRCA (n=1100)	Macrophage M2_CIBERSORT-ABS	0.241332	1.22548e-14	8.40537e-14
BRCA (n=1100)	Macrophage M2_QUANTISEQ	0.0106151	0.738185	0.797129
BRCA (n=1100)	Macrophage M2_TIDE	-0.351302	3.0283e-30	5.19888e-29
BRCA (n=1100)	Macrophage M2_XCELL	0.0832493	0.00864152	0.017472
BRCA (n=1100)	Macrophage_EPIC	0.316845	1.28726e-24	1.7086e-23
BRCA (n=1100)	Macrophage_TIMER	-0.345841	2.63909e-29	4.39899e-28
BRCA (n=1100)	Macrophage_XCELL	0.172648	4.31252e-08	1.77389e-07
BRCA (n=1100)	Macrophage/Monocyte_MCPCOUNTER	0.36003	8.70266e-32	1.56921e-30
BRCA (n=1100)	Myeloid dendritic cell activated_CIBERSORT	0.00256547	0.935615	0.954594
BRCA (n=1100)	Myeloid dendritic cell activated_CIBERSORT-ABS	0.0143525	0.6513	0.729976
BRCA (n=1100)	Myeloid dendritic cell activated_XCELL	0.71809	2.42556e-158	6.95408e-155
BRCA (n=1100)	Myeloid dendritic cell resting_CIBERSORT	0.17517	2.71623e-08	1.1319e-07
BRCA (n=1100)	Myeloid dendritic cell resting_CIBERSORT-ABS	0.262464	4.01662e-17	3.2077e-16
BRCA (n=1100)	Myeloid dendritic cell_MCPCOUNTER	0.600741	1.5483e-98	4.03542e-96
BRCA (n=1100)	Myeloid dendritic cell_QUANTISEQ	0.0456932	0.149997	0.217742
BRCA (n=1100)	Myeloid dendritic cell_TIMER	0.464811	2.00436e-54	9.42051e-53
BRCA (n=1100)	Myeloid dendritic cell_XCELL	0.659531	4.04616e-125	5.80017e-122
BRCA (n=1100)	Neutrophil_CIBERSORT	-0.133359	2.46389e-05	7.46721e-05
BRCA (n=1100)	Neutrophil_CIBERSORT-ABS	-0.114034	0.000315211	0.00079552
BRCA (n=1100)	Neutrophil_MCPCOUNTER	-0.213936	9.3943e-12	5.15967e-11
BRCA (n=1100)	Neutrophil_QUANTISEQ	0.088976	0.00499659	0.0105799
BRCA (n=1100)	Neutrophil_TIMER	0.438675	5.24217e-48	1.83284e-46
BRCA (n=1100)	Neutrophil_XCELL	-0.00254972	0.93601	0.954657
BRCA (n=1100)	Plasmacytoid dendritic cell_XCELL	0.399678	2.03324e-39	5.25161e-38
BRCA (n=1100)	T cell CD4+ (non-regulatory)_QUANTISEQ	-0.14445	4.82026e-06	1.59765e-05
BRCA (n=1100)	T cell CD4+ (non-regulatory)_XCELL	0.0570104	0.0723976	0.117135
BRCA (n=1100)	T cell CD4+ central memory_XCELL	0.0336648	0.288989	0.380827
BRCA (n=1100)	T cell CD4+ effector memory_XCELL	0.264388	2.32363e-17	1.91984e-16
BRCA (n=1100)	T cell CD4+ memory activated_CIBERSORT	0.275355	9.41222e-19	8.73296e-18
BRCA (n=1100)	T cell CD4+ memory activated_CIBERSORT-ABS	0.280291	2.11773e-19	2.07219e-18
BRCA (n=1100)	T cell CD4+ memory resting_CIBERSORT	0.200877	1.65351e-10	8.28776e-10
BRCA (n=1100)	T cell CD4+ memory resting_CIBERSORT-ABS	0.470878	5.38162e-56	2.85724e-54
BRCA (n=1100)	T cell CD4+ memory_XCELL	0.338727	4.15508e-28	6.47424e-27
BRCA (n=1100)	T cell CD4+ naive_CIBERSORT	-0.0417702	0.188228	0.264468
BRCA (n=1100)	T cell CD4+ naive_CIBERSORT-ABS	-0.0413005	0.193248	0.270397
BRCA (n=1100)	T cell CD4+ naive_XCELL	0.3112	9.21716e-24	1.17447e-22
BRCA (n=1100)	T cell CD4+ Th1_XCELL	0.13189	3.03005e-05	9.05857e-05
BRCA (n=1100)	T cell CD4+ Th2_XCELL	0.363902	1.73851e-32	3.23656e-31
BRCA (n=1100)	T cell CD4+_EPIC	0.118993	0.000169752	0.000448553
BRCA (n=1100)	T cell CD4+_TIMER	0.536649	3.20162e-75	5.39944e-73
BRCA (n=1100)	T cell CD8+ central memory_XCELL	0.607214	3.41433e-101	9.78889e-99
BRCA (n=1100)	T cell CD8+ effector memory_XCELL	0.111035	0.000452994	0.00112056
BRCA (n=1100)	T cell CD8+ naive_XCELL	0.232155	1.24792e-13	7.93298e-13
BRCA (n=1100)	T cell CD8+_CIBERSORT	0.429456	7.12544e-46	2.34812e-44
BRCA (n=1100)	T cell CD8+_CIBERSORT-ABS	0.631792	7.34784e-112	5.26656e-109
BRCA (n=1100)	T cell CD8+_EPIC	0.258066	1.38019e-16	1.06086e-15
BRCA (n=1100)	T cell CD8+_MCPCOUNTER	0.625446	5.15782e-109	2.1125e-106
BRCA (n=1100)	T cell CD8+_QUANTISEQ	0.609626	3.37173e-102	1.07408e-99
BRCA (n=1100)	T cell CD8+_TIMER	-0.110386	0.000489377	0.0012064
BRCA (n=1100)	T cell CD8+_XCELL	0.489095	6.59293e-61	4.20043e-59
BRCA-Basal (n=191)	B cell memory_CIBERSORT	0.304099	4.51386e-05	0.00013061
BRCA-Basal (n=191)	B cell memory_CIBERSORT-ABS	0.336623	5.58271e-06	1.83551e-05
BRCA-Basal (n=191)	B cell memory_XCELL	0.69225	3.74633e-26	5.34364e-25
BRCA-Basal (n=191)	B cell naive_CIBERSORT	0.0469885	0.538096	0.626868
BRCA-Basal (n=191)	B cell naive_CIBERSORT-ABS	0.160861	0.0339687	0.0596742
BRCA-Basal (n=191)	B cell naive_XCELL	0.443695	8.68185e-10	4.14158e-09
BRCA-Basal (n=191)	B cell plasma_CIBERSORT	-0.203788	0.00699373	0.0143735
BRCA-Basal (n=191)	B cell plasma_CIBERSORT-ABS	-0.0299238	0.695084	0.764699
BRCA-Basal (n=191)	B cell plasma_XCELL	0.188796	0.0125988	0.0247912
BRCA-Basal (n=191)	B cell_EPIC	0.42786	3.88967e-09	1.74245e-08
BRCA-Basal (n=191)	B cell_MCPCOUNTER	0.430208	3.12913e-09	1.41057e-08
BRCA-Basal (n=191)	B cell_QUANTISEQ	0.706223	1.37e-27	2.0782e-26
BRCA-Basal (n=191)	B cell_TIMER	0.384046	1.68207e-07	6.58809e-07
BRCA-Basal (n=191)	B cell_XCELL	0.631401	9.62565e-21	1.04533e-19
BRCA-Basal (n=191)	Class-switched memory B cell_XCELL	0.645161	7.36366e-22	8.37762e-21
BRCA-Basal (n=191)	Macrophage M0_CIBERSORT	-0.149285	0.0492931	0.083475
BRCA-Basal (n=191)	Macrophage M0_CIBERSORT-ABS	0.0936514	0.219017	0.300873
BRCA-Basal (n=191)	Macrophage M1_CIBERSORT	0.316079	2.14956e-05	6.61243e-05
BRCA-Basal (n=191)	Macrophage M1_CIBERSORT-ABS	0.478266	2.48427e-11	1.31653e-10
BRCA-Basal (n=191)	Macrophage M1_QUANTISEQ	0.238896	0.00150022	0.00346027
BRCA-Basal (n=191)	Macrophage M1_XCELL	0.302279	5.03828e-05	0.000145173
BRCA-Basal (n=191)	Macrophage M2_CIBERSORT	-0.34382	3.40068e-06	1.14974e-05
BRCA-Basal (n=191)	Macrophage M2_CIBERSORT-ABS	0.156166	0.0396128	0.0685809
BRCA-Basal (n=191)	Macrophage M2_QUANTISEQ	0.232218	0.00204689	0.00462445
BRCA-Basal (n=191)	Macrophage M2_TIDE	-0.301571	5.25763e-05	0.00015119
BRCA-Basal (n=191)	Macrophage M2_XCELL	0.0950951	0.211965	0.292869
BRCA-Basal (n=191)	Macrophage_EPIC	0.327781	1.00935e-05	3.2333e-05
BRCA-Basal (n=191)	Macrophage_TIMER	-0.390461	1.00192e-07	4.00628e-07
BRCA-Basal (n=191)	Macrophage_XCELL	0.260591	0.000514953	0.00126618
BRCA-Basal (n=191)	Macrophage/Monocyte_MCPCOUNTER	0.370061	5.01243e-07	1.86148e-06
BRCA-Basal (n=191)	Myeloid dendritic cell activated_CIBERSORT	0.113112	0.137261	0.20264
BRCA-Basal (n=191)	Myeloid dendritic cell activated_CIBERSORT-ABS	0.131722	0.0831734	0.131964
BRCA-Basal (n=191)	Myeloid dendritic cell activated_XCELL	0.584657	2.45137e-17	2.00874e-16
BRCA-Basal (n=191)	Myeloid dendritic cell resting_CIBERSORT	0.0122455	0.872589	0.906746
BRCA-Basal (n=191)	Myeloid dendritic cell resting_CIBERSORT-ABS	0.0570752	0.454426	0.550883
BRCA-Basal (n=191)	Myeloid dendritic cell_MCPCOUNTER	0.442511	9.73783e-10	4.61461e-09
BRCA-Basal (n=191)	Myeloid dendritic cell_QUANTISEQ	-0.0117943	0.877246	0.910953
BRCA-Basal (n=191)	Myeloid dendritic cell_TIMER	0.267259	0.000363791	0.000910113
BRCA-Basal (n=191)	Myeloid dendritic cell_XCELL	0.377241	2.87983e-07	1.10233e-06
BRCA-Basal (n=191)	Neutrophil_CIBERSORT	-0.0417303	0.584564	0.669307
BRCA-Basal (n=191)	Neutrophil_CIBERSORT-ABS	-0.0260847	0.732608	0.793197
BRCA-Basal (n=191)	Neutrophil_MCPCOUNTER	-0.000954571	0.990026	0.992449
BRCA-Basal (n=191)	Neutrophil_QUANTISEQ	-0.0285581	0.708353	0.773952
BRCA-Basal (n=191)	Neutrophil_TIMER	0.330625	8.35925e-06	2.70496e-05
BRCA-Basal (n=191)	Neutrophil_XCELL	-0.0704526	0.355599	0.45291
BRCA-Basal (n=191)	Plasmacytoid dendritic cell_XCELL	0.558121	1.2338e-15	8.93261e-15
BRCA-Basal (n=191)	T cell CD4+ (non-regulatory)_QUANTISEQ	-0.316913	2.03891e-05	6.28553e-05
BRCA-Basal (n=191)	T cell CD4+ (non-regulatory)_XCELL	0.0516463	0.498531	0.590615
BRCA-Basal (n=191)	T cell CD4+ central memory_XCELL	-0.0603083	0.429232	0.527253
BRCA-Basal (n=191)	T cell CD4+ effector memory_XCELL	-0.017214	0.82163	0.863442
BRCA-Basal (n=191)	T cell CD4+ memory activated_CIBERSORT	0.0882127	0.247078	0.332882
BRCA-Basal (n=191)	T cell CD4+ memory activated_CIBERSORT-ABS	0.108878	0.152688	0.220755
BRCA-Basal (n=191)	T cell CD4+ memory resting_CIBERSORT	0.124079	0.102841	0.158095
BRCA-Basal (n=191)	T cell CD4+ memory resting_CIBERSORT-ABS	0.318312	1.86527e-05	5.79387e-05
BRCA-Basal (n=191)	T cell CD4+ memory_XCELL	0.295722	7.44198e-05	0.000210416
BRCA-Basal (n=191)	T cell CD4+ naive_CIBERSORT	-0.000218203	0.99772	0.998068
BRCA-Basal (n=191)	T cell CD4+ naive_CIBERSORT-ABS	0.000603027	0.993699	0.994769
BRCA-Basal (n=191)	T cell CD4+ naive_XCELL	0.210609	0.00527967	0.0111203
BRCA-Basal (n=191)	T cell CD4+ Th1_XCELL	0.0509699	0.50418	0.595739
BRCA-Basal (n=191)	T cell CD4+ Th2_XCELL	0.337821	5.14497e-06	1.69743e-05
BRCA-Basal (n=191)	T cell CD4+_EPIC	0.202607	0.00733633	0.0150345
BRCA-Basal (n=191)	T cell CD4+_TIMER	0.403658	3.33112e-08	1.3821e-07
BRCA-Basal (n=191)	T cell CD8+ central memory_XCELL	0.517047	2.78727e-13	1.74098e-12
BRCA-Basal (n=191)	T cell CD8+ effector memory_XCELL	0.280113	0.000181453	0.000476834
BRCA-Basal (n=191)	T cell CD8+ naive_XCELL	0.15411	0.0423214	0.072656
BRCA-Basal (n=191)	T cell CD8+_CIBERSORT	0.354157	1.63246e-06	5.77184e-06
BRCA-Basal (n=191)	T cell CD8+_CIBERSORT-ABS	0.490102	6.69589e-12	3.72759e-11
BRCA-Basal (n=191)	T cell CD8+_EPIC	0.215369	0.00431715	0.00926443
BRCA-Basal (n=191)	T cell CD8+_MCPCOUNTER	0.334559	6.42096e-06	2.09908e-05
BRCA-Basal (n=191)	T cell CD8+_QUANTISEQ	0.340488	4.2843e-06	1.42661e-05
BRCA-Basal (n=191)	T cell CD8+_TIMER	-0.21126	0.00513759	0.0108385
BRCA-Basal (n=191)	T cell CD8+_XCELL	0.38519	1.53495e-07	6.04491e-07
BRCA-Her2 (n=82)	B cell memory_CIBERSORT	0.0898101	0.453107	0.549982
BRCA-Her2 (n=82)	B cell memory_CIBERSORT-ABS	0.121965	0.307439	0.401745
BRCA-Her2 (n=82)	B cell memory_XCELL	0.529433	1.73788e-06	6.12099e-06
BRCA-Her2 (n=82)	B cell naive_CIBERSORT	0.465226	3.82948e-05	0.000112376
BRCA-Her2 (n=82)	B cell naive_CIBERSORT-ABS	0.694718	1.29643e-11	7.03951e-11
BRCA-Her2 (n=82)	B cell naive_XCELL	0.301447	0.0100747	0.0201983
BRCA-Her2 (n=82)	B cell plasma_CIBERSORT	-0.299916	0.0104809	0.0209107
BRCA-Her2 (n=82)	B cell plasma_CIBERSORT-ABS	-0.0908547	0.447848	0.545215
BRCA-Her2 (n=82)	B cell plasma_XCELL	0.36677	0.00153019	0.00352373
BRCA-Her2 (n=82)	B cell_EPIC	0.763613	6.19034e-15	4.33929e-14
BRCA-Her2 (n=82)	B cell_MCPCOUNTER	0.778767	8.06302e-16	5.94259e-15
BRCA-Her2 (n=82)	B cell_QUANTISEQ	0.626393	3.97657e-09	1.7786e-08
BRCA-Her2 (n=82)	B cell_TIMER	0.277392	0.0183217	0.0346493
BRCA-Her2 (n=82)	B cell_XCELL	0.71245	2.24387e-12	1.31289e-11
BRCA-Her2 (n=82)	Class-switched memory B cell_XCELL	0.759978	9.86856e-15	6.81763e-14
BRCA-Her2 (n=82)	Macrophage M0_CIBERSORT	-0.196909	0.0973457	0.151186
BRCA-Her2 (n=82)	Macrophage M0_CIBERSORT-ABS	0.155806	0.19124	0.267848
BRCA-Her2 (n=82)	Macrophage M1_CIBERSORT	0.430815	0.000158294	0.000419823
BRCA-Her2 (n=82)	Macrophage M1_CIBERSORT-ABS	0.783776	3.96701e-16	2.96956e-15
BRCA-Her2 (n=82)	Macrophage M1_QUANTISEQ	-0.0300404	0.802203	0.846803
BRCA-Her2 (n=82)	Macrophage M1_XCELL	0.252801	0.0321554	0.056872
BRCA-Her2 (n=82)	Macrophage M2_CIBERSORT	-0.496494	9.18068e-06	2.95742e-05
BRCA-Her2 (n=82)	Macrophage M2_CIBERSORT-ABS	0.321924	0.00582226	0.0121488
BRCA-Her2 (n=82)	Macrophage M2_QUANTISEQ	0.445221	8.90095e-05	0.000246799
BRCA-Her2 (n=82)	Macrophage M2_TIDE	-0.175813	0.139609	0.205156
BRCA-Her2 (n=82)	Macrophage M2_XCELL	0.00413848	0.972477	0.980888
BRCA-Her2 (n=82)	Macrophage_EPIC	0.440188	0.00010916	0.000297209
BRCA-Her2 (n=82)	Macrophage_TIMER	-0.388972	0.000733343	0.0017668
BRCA-Her2 (n=82)	Macrophage_XCELL	0.150258	0.207729	0.287724
BRCA-Her2 (n=82)	Macrophage/Monocyte_MCPCOUNTER	0.0770791	0.519867	0.610844
BRCA-Her2 (n=82)	Myeloid dendritic cell activated_CIBERSORT	-0.137534	0.249289	0.335388
BRCA-Her2 (n=82)	Myeloid dendritic cell activated_CIBERSORT-ABS	-0.130524	0.274467	0.364641
BRCA-Her2 (n=82)	Myeloid dendritic cell activated_XCELL	0.776881	1.04813e-15	7.64629e-15
BRCA-Her2 (n=82)	Myeloid dendritic cell resting_CIBERSORT	0.330251	0.0046087	0.00985319
BRCA-Her2 (n=82)	Myeloid dendritic cell resting_CIBERSORT-ABS	0.394212	0.000611787	0.0014877
BRCA-Her2 (n=82)	Myeloid dendritic cell_MCPCOUNTER	0.845546	9.34618e-21	1.01884e-19
BRCA-Her2 (n=82)	Myeloid dendritic cell_QUANTISEQ	0.0465775	0.697634	0.766915
BRCA-Her2 (n=82)	Myeloid dendritic cell_TIMER	0.378446	0.00104601	0.00247843
BRCA-Her2 (n=82)	Myeloid dendritic cell_XCELL	0.742095	8.73324e-14	5.60139e-13
BRCA-Her2 (n=82)	Neutrophil_CIBERSORT	-0.0816542	0.49532	0.587782
BRCA-Her2 (n=82)	Neutrophil_CIBERSORT-ABS	-0.0815224	0.496018	0.588367
BRCA-Her2 (n=82)	Neutrophil_MCPCOUNTER	-0.0473711	0.692736	0.762996
BRCA-Her2 (n=82)	Neutrophil_QUANTISEQ	-0.0746311	0.53325	0.623502
BRCA-Her2 (n=82)	Neutrophil_TIMER	0.347169	0.00280998	0.00622581
BRCA-Her2 (n=82)	Neutrophil_XCELL	0.110491	0.3555	0.45291
BRCA-Her2 (n=82)	Plasmacytoid dendritic cell_XCELL	0.530654	1.62831e-06	5.77053e-06
BRCA-Her2 (n=82)	T cell CD4+ (non-regulatory)_QUANTISEQ	0.00813429	0.945933	0.963065
BRCA-Her2 (n=82)	T cell CD4+ (non-regulatory)_XCELL	0.082675	0.489926	0.583269
BRCA-Her2 (n=82)	T cell CD4+ central memory_XCELL	0.286122	0.01483	0.028758
BRCA-Her2 (n=82)	T cell CD4+ effector memory_XCELL	0.406886	0.000389796	0.000971779
BRCA-Her2 (n=82)	T cell CD4+ memory activated_CIBERSORT	0.31966	0.00619749	0.0128942
BRCA-Her2 (n=82)	T cell CD4+ memory activated_CIBERSORT-ABS	0.339135	0.00356618	0.00776918
BRCA-Her2 (n=82)	T cell CD4+ memory resting_CIBERSORT	0.31482	0.0070718	0.0145131
BRCA-Her2 (n=82)	T cell CD4+ memory resting_CIBERSORT-ABS	0.636244	1.90013e-09	8.73022e-09
BRCA-Her2 (n=82)	T cell CD4+ memory_XCELL	0.383358	0.000887548	0.0021205
BRCA-Her2 (n=82)	T cell CD4+ naive_CIBERSORT	NA	NA	NA
BRCA-Her2 (n=82)	T cell CD4+ naive_CIBERSORT-ABS	NA	NA	NA
BRCA-Her2 (n=82)	T cell CD4+ naive_XCELL	0.462664	4.27902e-05	0.000124674
BRCA-Her2 (n=82)	T cell CD4+ Th1_XCELL	0.219056	0.0644943	0.10566
BRCA-Her2 (n=82)	T cell CD4+ Th2_XCELL	0.176018	0.139141	0.204677
BRCA-Her2 (n=82)	T cell CD4+_EPIC	0.327024	0.0050494	0.0106839
BRCA-Her2 (n=82)	T cell CD4+_TIMER	0.613562	1.00181e-08	4.27407e-08
BRCA-Her2 (n=82)	T cell CD8+ central memory_XCELL	0.731627	2.88554e-13	1.79844e-12
BRCA-Her2 (n=82)	T cell CD8+ effector memory_XCELL	0.096955	0.417823	0.515225
BRCA-Her2 (n=82)	T cell CD8+ naive_XCELL	0.0772325	0.519034	0.610116
BRCA-Her2 (n=82)	T cell CD8+_CIBERSORT	0.527966	1.87859e-06	6.60038e-06
BRCA-Her2 (n=82)	T cell CD8+_CIBERSORT-ABS	0.744899	6.27906e-14	4.0821e-13
BRCA-Her2 (n=82)	T cell CD8+_EPIC	0.446202	8.55078e-05	0.000238474
BRCA-Her2 (n=82)	T cell CD8+_MCPCOUNTER	0.693732	1.42391e-11	7.70257e-11
BRCA-Her2 (n=82)	T cell CD8+_QUANTISEQ	0.7059	4.35409e-12	2.48175e-11
BRCA-Her2 (n=82)	T cell CD8+_TIMER	0.0604066	0.614221	0.695487
BRCA-Her2 (n=82)	T cell CD8+_XCELL	0.513865	3.90002e-06	1.30929e-05
BRCA-LumA (n=568)	B cell memory_CIBERSORT	0.281527	7.12257e-11	3.69266e-10
BRCA-LumA (n=568)	B cell memory_CIBERSORT-ABS	0.300918	2.78395e-12	1.61244e-11
BRCA-LumA (n=568)	B cell memory_XCELL	0.38623	7.73318e-20	7.77931e-19
BRCA-LumA (n=568)	B cell naive_CIBERSORT	0.122324	0.00535137	0.0112398
BRCA-LumA (n=568)	B cell naive_CIBERSORT-ABS	0.387227	6.10772e-20	6.18758e-19
BRCA-LumA (n=568)	B cell naive_XCELL	0.319336	1.01433e-13	6.46243e-13
BRCA-LumA (n=568)	B cell plasma_CIBERSORT	-0.0889806	0.0431428	0.0738892
BRCA-LumA (n=568)	B cell plasma_CIBERSORT-ABS	0.134153	0.0022374	0.00503108
BRCA-LumA (n=568)	B cell plasma_XCELL	0.27172	3.34486e-10	1.63927e-09
BRCA-LumA (n=568)	B cell_EPIC	0.641614	2.59995e-61	1.7335e-59
BRCA-LumA (n=568)	B cell_MCPCOUNTER	0.696141	3.77476e-76	6.76389e-74
BRCA-LumA (n=568)	B cell_QUANTISEQ	0.463268	7.25138e-29	1.18123e-27
BRCA-LumA (n=568)	B cell_TIMER	0.264776	9.63819e-10	4.57495e-09
BRCA-LumA (n=568)	B cell_XCELL	0.493147	4.88383e-33	9.65652e-32
BRCA-LumA (n=568)	Class-switched memory B cell_XCELL	0.477738	7.78953e-31	1.3701e-29
BRCA-LumA (n=568)	Macrophage M0_CIBERSORT	-0.0943911	0.0318868	0.0564665
BRCA-LumA (n=568)	Macrophage M0_CIBERSORT-ABS	0.0192909	0.66167	0.738998
BRCA-LumA (n=568)	Macrophage M1_CIBERSORT	0.460472	1.69876e-28	2.73614e-27
BRCA-LumA (n=568)	Macrophage M1_CIBERSORT-ABS	0.660462	4.34039e-66	4.01416e-64
BRCA-LumA (n=568)	Macrophage M1_QUANTISEQ	0.0674019	0.12587	0.187855
BRCA-LumA (n=568)	Macrophage M1_XCELL	0.0987908	0.0246829	0.0449593
BRCA-LumA (n=568)	Macrophage M2_CIBERSORT	-0.491934	7.35109e-33	1.42402e-31
BRCA-LumA (n=568)	Macrophage M2_CIBERSORT-ABS	0.331159	1.06914e-14	7.36835e-14
BRCA-LumA (n=568)	Macrophage M2_QUANTISEQ	0.241499	2.69273e-08	1.12374e-07
BRCA-LumA (n=568)	Macrophage M2_TIDE	-0.260867	1.72581e-09	7.99339e-09
BRCA-LumA (n=568)	Macrophage M2_XCELL	0.204229	2.84254e-06	9.65587e-06
BRCA-LumA (n=568)	Macrophage_EPIC	0.260379	1.85468e-09	8.5364e-09
BRCA-LumA (n=568)	Macrophage_TIMER	-0.228231	1.55208e-07	6.10398e-07
BRCA-LumA (n=568)	Macrophage_XCELL	0.0990208	0.0243486	0.044435
BRCA-LumA (n=568)	Macrophage/Monocyte_MCPCOUNTER	0.323243	4.87508e-14	3.2057e-13
BRCA-LumA (n=568)	Myeloid dendritic cell activated_CIBERSORT	-0.116109	0.00822743	0.0166936
BRCA-LumA (n=568)	Myeloid dendritic cell activated_CIBERSORT-ABS	-0.106791	0.0151306	0.0292511
BRCA-LumA (n=568)	Myeloid dendritic cell activated_XCELL	0.734474	9.38112e-89	2.24131e-86
BRCA-LumA (n=568)	Myeloid dendritic cell resting_CIBERSORT	0.263015	1.2545e-09	5.88652e-09
BRCA-LumA (n=568)	Myeloid dendritic cell resting_CIBERSORT-ABS	0.354334	9.70876e-17	7.54336e-16
BRCA-LumA (n=568)	Myeloid dendritic cell_MCPCOUNTER	0.657841	2.10188e-65	1.82608e-63
BRCA-LumA (n=568)	Myeloid dendritic cell_QUANTISEQ	0.039577	0.369153	0.466703
BRCA-LumA (n=568)	Myeloid dendritic cell_TIMER	0.436893	1.64419e-25	2.25545e-24
BRCA-LumA (n=568)	Myeloid dendritic cell_XCELL	0.673929	1.01506e-69	1.21257e-67
BRCA-LumA (n=568)	Neutrophil_CIBERSORT	-0.213526	9.58635e-07	3.47021e-06
BRCA-LumA (n=568)	Neutrophil_CIBERSORT-ABS	-0.193461	9.41841e-06	3.0272e-05
BRCA-LumA (n=568)	Neutrophil_MCPCOUNTER	-0.0565198	0.199478	0.278434
BRCA-LumA (n=568)	Neutrophil_QUANTISEQ	0.0115118	0.793995	0.839065
BRCA-LumA (n=568)	Neutrophil_TIMER	0.35265	1.38459e-16	1.0614e-15
BRCA-LumA (n=568)	Neutrophil_XCELL	-0.0603302	0.170782	0.244084
BRCA-LumA (n=568)	Plasmacytoid dendritic cell_XCELL	0.263168	1.22626e-09	5.76341e-09
BRCA-LumA (n=568)	T cell CD4+ (non-regulatory)_QUANTISEQ	0.116022	0.00827609	0.0167804
BRCA-LumA (n=568)	T cell CD4+ (non-regulatory)_XCELL	0.0135442	0.758667	0.814717
BRCA-LumA (n=568)	T cell CD4+ central memory_XCELL	0.0727376	0.0985212	0.152516
BRCA-LumA (n=568)	T cell CD4+ effector memory_XCELL	0.455977	6.56877e-28	1.01798e-26
BRCA-LumA (n=568)	T cell CD4+ memory activated_CIBERSORT	0.200344	4.41255e-06	1.46761e-05
BRCA-LumA (n=568)	T cell CD4+ memory activated_CIBERSORT-ABS	0.20113	4.03952e-06	1.35138e-05
BRCA-LumA (n=568)	T cell CD4+ memory resting_CIBERSORT	0.293479	9.94302e-12	5.4506e-11
BRCA-LumA (n=568)	T cell CD4+ memory resting_CIBERSORT-ABS	0.539572	2.14494e-40	5.80146e-39
BRCA-LumA (n=568)	T cell CD4+ memory_XCELL	0.281199	7.50864e-11	3.86486e-10
BRCA-LumA (n=568)	T cell CD4+ naive_CIBERSORT	-0.0545354	0.215743	0.297516
BRCA-LumA (n=568)	T cell CD4+ naive_CIBERSORT-ABS	-0.0539246	0.220937	0.303365
BRCA-LumA (n=568)	T cell CD4+ naive_XCELL	0.352305	1.48881e-16	1.13824e-15
BRCA-LumA (n=568)	T cell CD4+ Th1_XCELL	0.00147842	0.973248	0.980888
BRCA-LumA (n=568)	T cell CD4+ Th2_XCELL	0.221451	3.64998e-07	1.3751e-06
BRCA-LumA (n=568)	T cell CD4+_EPIC	0.172541	8.03709e-05	0.000225684
BRCA-LumA (n=568)	T cell CD4+_TIMER	0.525675	4.50823e-38	1.10471e-36
BRCA-LumA (n=568)	T cell CD8+ central memory_XCELL	0.647056	1.17559e-62	8.86948e-61
BRCA-LumA (n=568)	T cell CD8+ effector memory_XCELL	-0.0144697	0.74274	0.801142
BRCA-LumA (n=568)	T cell CD8+ naive_XCELL	0.280377	8.56563e-11	4.40102e-10
BRCA-LumA (n=568)	T cell CD8+_CIBERSORT	0.489052	1.92818e-32	3.56652e-31
BRCA-LumA (n=568)	T cell CD8+_CIBERSORT-ABS	0.685166	6.69382e-73	9.13866e-71
BRCA-LumA (n=568)	T cell CD8+_EPIC	0.209608	1.5248e-06	5.43058e-06
BRCA-LumA (n=568)	T cell CD8+_MCPCOUNTER	0.677052	1.36952e-70	1.70713e-68
BRCA-LumA (n=568)	T cell CD8+_QUANTISEQ	0.681806	6.1913e-72	8.06838e-70
BRCA-LumA (n=568)	T cell CD8+_TIMER	0.074973	0.088572	0.139449
BRCA-LumA (n=568)	T cell CD8+_XCELL	0.491227	9.32105e-33	1.75812e-31
BRCA-LumB (n=219)	B cell memory_CIBERSORT	0.0815027	0.261085	0.348315
BRCA-LumB (n=219)	B cell memory_CIBERSORT-ABS	0.089571	0.21664	0.298322
BRCA-LumB (n=219)	B cell memory_XCELL	0.40675	4.78745e-09	2.12143e-08
BRCA-LumB (n=219)	B cell naive_CIBERSORT	0.137653	0.0569107	0.0945872
BRCA-LumB (n=219)	B cell naive_CIBERSORT-ABS	0.312284	1.03529e-05	3.30165e-05
BRCA-LumB (n=219)	B cell naive_XCELL	0.395161	1.40877e-08	5.97476e-08
BRCA-LumB (n=219)	B cell plasma_CIBERSORT	-0.0526813	0.468016	0.562836
BRCA-LumB (n=219)	B cell plasma_CIBERSORT-ABS	0.108641	0.133618	0.197669
BRCA-LumB (n=219)	B cell plasma_XCELL	0.345687	9.06369e-07	3.30606e-06
BRCA-LumB (n=219)	B cell_EPIC	0.577131	1.92008e-18	1.73655e-17
BRCA-LumB (n=219)	B cell_MCPCOUNTER	0.636633	3.25833e-23	4.00928e-22
BRCA-LumB (n=219)	B cell_QUANTISEQ	0.184462	0.010428	0.0208341
BRCA-LumB (n=219)	B cell_TIMER	0.107404	0.138125	0.203496
BRCA-LumB (n=219)	B cell_XCELL	0.575541	2.4985e-18	2.2246e-17
BRCA-LumB (n=219)	Class-switched memory B cell_XCELL	0.456243	2.91903e-11	1.53557e-10
BRCA-LumB (n=219)	Macrophage M0_CIBERSORT	-0.148406	0.0399437	0.0690131
BRCA-LumB (n=219)	Macrophage M0_CIBERSORT-ABS	0.0416598	0.566147	0.653439
BRCA-LumB (n=219)	Macrophage M1_CIBERSORT	0.443766	1.14217e-10	5.81636e-10
BRCA-LumB (n=219)	Macrophage M1_CIBERSORT-ABS	0.590575	1.95339e-19	1.92453e-18
BRCA-LumB (n=219)	Macrophage M1_QUANTISEQ	0.0612486	0.398705	0.49786
BRCA-LumB (n=219)	Macrophage M1_XCELL	0.277596	9.68869e-05	0.000266834
BRCA-LumB (n=219)	Macrophage M2_CIBERSORT	-0.353645	4.85899e-07	1.80919e-06
BRCA-LumB (n=219)	Macrophage M2_CIBERSORT-ABS	0.260723	0.000259732	0.000663091
BRCA-LumB (n=219)	Macrophage M2_QUANTISEQ	0.138323	0.0557024	0.0929022
BRCA-LumB (n=219)	Macrophage M2_TIDE	-0.207677	0.00384703	0.00831782
BRCA-LumB (n=219)	Macrophage M2_XCELL	0.138115	0.056075	0.0933607
BRCA-LumB (n=219)	Macrophage_EPIC	0.35018	6.38781e-07	2.35124e-06
BRCA-LumB (n=219)	Macrophage_TIMER	-0.341225	1.27607e-06	4.57312e-06
BRCA-LumB (n=219)	Macrophage_XCELL	0.179773	0.0125923	0.0247912
BRCA-LumB (n=219)	Macrophage/Monocyte_MCPCOUNTER	0.222168	0.00195397	0.00442498
BRCA-LumB (n=219)	Myeloid dendritic cell activated_CIBERSORT	-0.131118	0.0698633	0.113483
BRCA-LumB (n=219)	Myeloid dendritic cell activated_CIBERSORT-ABS	-0.124443	0.0854756	0.135167
BRCA-LumB (n=219)	Myeloid dendritic cell activated_XCELL	0.692961	8.38904e-29	1.35884e-27
BRCA-LumB (n=219)	Myeloid dendritic cell resting_CIBERSORT	0.203818	0.00457449	0.00978736
BRCA-LumB (n=219)	Myeloid dendritic cell resting_CIBERSORT-ABS	0.29831	2.63869e-05	7.94656e-05
BRCA-LumB (n=219)	Myeloid dendritic cell_MCPCOUNTER	0.576518	2.12552e-18	1.91631e-17
BRCA-LumB (n=219)	Myeloid dendritic cell_QUANTISEQ	-0.0520437	0.473426	0.567676
BRCA-LumB (n=219)	Myeloid dendritic cell_TIMER	0.307415	1.44213e-05	4.54851e-05
BRCA-LumB (n=219)	Myeloid dendritic cell_XCELL	0.678642	2.90248e-27	4.28939e-26
BRCA-LumB (n=219)	Neutrophil_CIBERSORT	-0.13435	0.0631854	0.103694
BRCA-LumB (n=219)	Neutrophil_CIBERSORT-ABS	-0.120481	0.095993	0.149247
BRCA-LumB (n=219)	Neutrophil_MCPCOUNTER	-0.22556	0.00165701	0.00379142
BRCA-LumB (n=219)	Neutrophil_QUANTISEQ	-0.165635	0.0216755	0.0401444
BRCA-LumB (n=219)	Neutrophil_TIMER	0.183488	0.0108482	0.0216135
BRCA-LumB (n=219)	Neutrophil_XCELL	-0.0950651	0.189645	0.265743
BRCA-LumB (n=219)	Plasmacytoid dendritic cell_XCELL	0.418744	1.49896e-09	6.97649e-09
BRCA-LumB (n=219)	T cell CD4+ (non-regulatory)_QUANTISEQ	-0.0157087	0.828787	0.869105
BRCA-LumB (n=219)	T cell CD4+ (non-regulatory)_XCELL	0.0591788	0.414863	0.512236
BRCA-LumB (n=219)	T cell CD4+ central memory_XCELL	0.138212	0.0559009	0.093179
BRCA-LumB (n=219)	T cell CD4+ effector memory_XCELL	0.321521	5.43242e-06	1.78815e-05
BRCA-LumB (n=219)	T cell CD4+ memory activated_CIBERSORT	0.245776	0.000589939	0.00143911
BRCA-LumB (n=219)	T cell CD4+ memory activated_CIBERSORT-ABS	0.253338	0.000391952	0.000975456
BRCA-LumB (n=219)	T cell CD4+ memory resting_CIBERSORT	0.221838	0.00198524	0.00448871
BRCA-LumB (n=219)	T cell CD4+ memory resting_CIBERSORT-ABS	0.399667	9.30505e-09	3.98561e-08
BRCA-LumB (n=219)	T cell CD4+ memory_XCELL	0.31208	1.04989e-05	3.34449e-05
BRCA-LumB (n=219)	T cell CD4+ naive_CIBERSORT	-0.0978106	0.177115	0.252004
BRCA-LumB (n=219)	T cell CD4+ naive_CIBERSORT-ABS	-0.0978106	0.177115	0.252004
BRCA-LumB (n=219)	T cell CD4+ naive_XCELL	0.171043	0.0176889	0.0336523
BRCA-LumB (n=219)	T cell CD4+ Th1_XCELL	0.128381	0.0759577	0.122206
BRCA-LumB (n=219)	T cell CD4+ Th2_XCELL	0.164799	0.0223564	0.0412456
BRCA-LumB (n=219)	T cell CD4+_EPIC	0.222556	0.00191763	0.00434613
BRCA-LumB (n=219)	T cell CD4+_TIMER	0.412676	2.71285e-09	1.22678e-08
BRCA-LumB (n=219)	T cell CD8+ central memory_XCELL	0.525525	5.02084e-15	3.54551e-14
BRCA-LumB (n=219)	T cell CD8+ effector memory_XCELL	0.0895405	0.216797	0.298395
BRCA-LumB (n=219)	T cell CD8+ naive_XCELL	0.283266	6.85458e-05	0.000195155
BRCA-LumB (n=219)	T cell CD8+_CIBERSORT	0.43914	1.86797e-10	9.29769e-10
BRCA-LumB (n=219)	T cell CD8+_CIBERSORT-ABS	0.595306	8.51954e-20	8.5404e-19
BRCA-LumB (n=219)	T cell CD8+_EPIC	0.299338	2.46711e-05	7.46906e-05
BRCA-LumB (n=219)	T cell CD8+_MCPCOUNTER	0.567021	1.00048e-17	8.51146e-17
BRCA-LumB (n=219)	T cell CD8+_QUANTISEQ	0.557294	4.64706e-17	3.69061e-16
BRCA-LumB (n=219)	T cell CD8+_TIMER	-0.146756	0.0422304	0.0725431
BRCA-LumB (n=219)	T cell CD8+_XCELL	0.530815	2.38122e-15	1.70248e-14
CESC (n=306)	B cell memory_CIBERSORT	0.293848	6.39681e-07	2.35124e-06
CESC (n=306)	B cell memory_CIBERSORT-ABS	0.32006	5.13092e-08	2.09549e-07
CESC (n=306)	B cell memory_XCELL	0.425404	1.33382e-13	8.44162e-13
CESC (n=306)	B cell naive_CIBERSORT	0.0555019	0.357433	0.454641
CESC (n=306)	B cell naive_CIBERSORT-ABS	0.118998	0.0478604	0.0813371
CESC (n=306)	B cell naive_XCELL	0.251589	2.26846e-05	6.93962e-05
CESC (n=306)	B cell plasma_CIBERSORT	0.0174276	0.772762	0.824529
CESC (n=306)	B cell plasma_CIBERSORT-ABS	0.16463	0.00602617	0.0125469
CESC (n=306)	B cell plasma_XCELL	0.316213	7.54622e-08	3.04718e-07
CESC (n=306)	B cell_EPIC	0.471988	8.97429e-17	7.01071e-16
CESC (n=306)	B cell_MCPCOUNTER	0.556482	6.35472e-24	8.13348e-23
CESC (n=306)	B cell_QUANTISEQ	0.480215	2.19158e-17	1.81597e-16
CESC (n=306)	B cell_TIMER	0.432459	4.73438e-14	3.12034e-13
CESC (n=306)	B cell_XCELL	0.566555	6.43893e-25	8.62637e-24
CESC (n=306)	Class-switched memory B cell_XCELL	0.546972	5.14447e-23	6.24966e-22
CESC (n=306)	Macrophage M0_CIBERSORT	-0.113143	0.060026	0.09919
CESC (n=306)	Macrophage M0_CIBERSORT-ABS	0.0464126	0.441667	0.539064
CESC (n=306)	Macrophage M1_CIBERSORT	0.319777	5.27964e-08	2.1501e-07
CESC (n=306)	Macrophage M1_CIBERSORT-ABS	0.470675	1.12001e-16	8.65521e-16
CESC (n=306)	Macrophage M1_QUANTISEQ	0.0299768	0.619352	0.70019
CESC (n=306)	Macrophage M1_XCELL	0.259255	1.24073e-05	3.93059e-05
CESC (n=306)	Macrophage M2_CIBERSORT	-0.0242295	0.688057	0.761056
CESC (n=306)	Macrophage M2_CIBERSORT-ABS	0.3412	5.5807e-09	2.43901e-08
CESC (n=306)	Macrophage M2_QUANTISEQ	0.396256	7.51343e-12	4.15849e-11
CESC (n=306)	Macrophage M2_TIDE	-0.0620914	0.303138	0.396666
CESC (n=306)	Macrophage M2_XCELL	0.196465	0.00101213	0.00240214
CESC (n=306)	Macrophage_EPIC	0.376401	9.42191e-11	4.83231e-10
CESC (n=306)	Macrophage_TIMER	0.0703483	0.243218	0.328299
CESC (n=306)	Macrophage_XCELL	0.261576	1.02966e-05	3.28734e-05
CESC (n=306)	Macrophage/Monocyte_MCPCOUNTER	0.22395	0.000171103	0.00045129
CESC (n=306)	Myeloid dendritic cell activated_CIBERSORT	-0.220486	0.000216753	0.000558338
CESC (n=306)	Myeloid dendritic cell activated_CIBERSORT-ABS	-0.104152	0.0835768	0.132384
CESC (n=306)	Myeloid dendritic cell activated_XCELL	0.48391	1.14932e-17	9.69143e-17
CESC (n=306)	Myeloid dendritic cell resting_CIBERSORT	0.231155	0.000103386	0.000282832
CESC (n=306)	Myeloid dendritic cell resting_CIBERSORT-ABS	0.310657	1.30492e-07	5.1674e-07
CESC (n=306)	Myeloid dendritic cell_MCPCOUNTER	0.477167	3.71122e-17	2.98878e-16
CESC (n=306)	Myeloid dendritic cell_QUANTISEQ	0.016292	0.787203	0.835584
CESC (n=306)	Myeloid dendritic cell_TIMER	0.396553	7.22441e-12	4.00626e-11
CESC (n=306)	Myeloid dendritic cell_XCELL	0.49288	2.3201e-18	2.07219e-17
CESC (n=306)	Neutrophil_CIBERSORT	-0.130126	0.030376	0.0539244
CESC (n=306)	Neutrophil_CIBERSORT-ABS	-0.0987018	0.10115	0.156081
CESC (n=306)	Neutrophil_MCPCOUNTER	-0.0922734	0.125507	0.187411
CESC (n=306)	Neutrophil_QUANTISEQ	-0.0548766	0.362884	0.460552
CESC (n=306)	Neutrophil_TIMER	0.285973	1.30197e-06	4.65429e-06
CESC (n=306)	Neutrophil_XCELL	-0.105808	0.0787532	0.125996
CESC (n=306)	Plasmacytoid dendritic cell_XCELL	0.299463	3.8035e-07	1.43105e-06
CESC (n=306)	T cell CD4+ (non-regulatory)_QUANTISEQ	-0.221376	0.000204044	0.000528451
CESC (n=306)	T cell CD4+ (non-regulatory)_XCELL	0.0843304	0.161608	0.232129
CESC (n=306)	T cell CD4+ central memory_XCELL	-0.00214956	0.97159	0.980868
CESC (n=306)	T cell CD4+ effector memory_XCELL	0.277688	2.68733e-06	9.16122e-06
CESC (n=306)	T cell CD4+ memory activated_CIBERSORT	0.0933179	0.121267	0.181932
CESC (n=306)	T cell CD4+ memory activated_CIBERSORT-ABS	0.118667	0.0484885	0.0822097
CESC (n=306)	T cell CD4+ memory resting_CIBERSORT	0.0842077	0.162221	0.23266
CESC (n=306)	T cell CD4+ memory resting_CIBERSORT-ABS	0.221769	0.000198655	0.000516827
CESC (n=306)	T cell CD4+ memory_XCELL	0.145717	0.0152155	0.0293954
CESC (n=306)	T cell CD4+ naive_CIBERSORT	-0.032864	0.586002	0.669883
CESC (n=306)	T cell CD4+ naive_CIBERSORT-ABS	-0.032864	0.586002	0.669883
CESC (n=306)	T cell CD4+ naive_XCELL	0.355396	1.14233e-09	5.37777e-09
CESC (n=306)	T cell CD4+ Th1_XCELL	0.0754834	0.210424	0.29102
CESC (n=306)	T cell CD4+ Th2_XCELL	-0.0279826	0.642857	0.721924
CESC (n=306)	T cell CD4+_EPIC	-0.0742528	0.217977	0.299588
CESC (n=306)	T cell CD4+_TIMER	0.396956	6.85053e-12	3.80629e-11
CESC (n=306)	T cell CD8+ central memory_XCELL	0.460046	6.4996e-16	4.80267e-15
CESC (n=306)	T cell CD8+ effector memory_XCELL	0.263239	8.99937e-06	2.90554e-05
CESC (n=306)	T cell CD8+ naive_XCELL	0.167907	0.00508171	0.0107443
CESC (n=306)	T cell CD8+_CIBERSORT	0.199155	0.000858977	0.00205395
CESC (n=306)	T cell CD8+_CIBERSORT-ABS	0.422112	2.14479e-13	1.34849e-12
CESC (n=306)	T cell CD8+_EPIC	0.283413	1.6327e-06	5.77184e-06
CESC (n=306)	T cell CD8+_MCPCOUNTER	0.396018	7.75182e-12	4.27394e-11
CESC (n=306)	T cell CD8+_QUANTISEQ	0.391969	1.31596e-11	7.13205e-11
CESC (n=306)	T cell CD8+_TIMER	0.204044	0.000634008	0.00153782
CESC (n=306)	T cell CD8+_XCELL	0.409546	1.25488e-12	7.44876e-12
CHOL (n=36)	B cell memory_CIBERSORT	0.186359	0.283766	0.374393
CHOL (n=36)	B cell memory_CIBERSORT-ABS	0.232152	0.179607	0.255044
CHOL (n=36)	B cell memory_XCELL	0.402387	0.0165578	0.0317278
CHOL (n=36)	B cell naive_CIBERSORT	-0.0765087	0.662231	0.739337
CHOL (n=36)	B cell naive_CIBERSORT-ABS	0.0307504	0.8608	0.896771
CHOL (n=36)	B cell naive_XCELL	0.387386	0.0214953	0.0398365
CHOL (n=36)	B cell plasma_CIBERSORT	-0.0936267	0.592675	0.675357
CHOL (n=36)	B cell plasma_CIBERSORT-ABS	-0.0411806	0.814302	0.85705
CHOL (n=36)	B cell plasma_XCELL	-0.113402	0.51658	0.607978
CHOL (n=36)	B cell_EPIC	0.489695	0.00282856	0.00626215
CHOL (n=36)	B cell_MCPCOUNTER	0.349394	0.0396559	0.0686141
CHOL (n=36)	B cell_QUANTISEQ	0.747537	2.4702e-07	9.49339e-07
CHOL (n=36)	B cell_TIMER	0.531235	0.00102483	0.00243027
CHOL (n=36)	B cell_XCELL	0.353604	0.0371756	0.0647524
CHOL (n=36)	Class-switched memory B cell_XCELL	0.755138	1.58778e-07	6.2273e-07
CHOL (n=36)	Macrophage M0_CIBERSORT	0.131144	0.452694	0.549714
CHOL (n=36)	Macrophage M0_CIBERSORT-ABS	0.363776	0.0316996	0.0561698
CHOL (n=36)	Macrophage M1_CIBERSORT	0.0475525	0.78619	0.835127
CHOL (n=36)	Macrophage M1_CIBERSORT-ABS	0.233909	0.176243	0.251138
CHOL (n=36)	Macrophage M1_QUANTISEQ	0.367286	0.0299707	0.0534365
CHOL (n=36)	Macrophage M1_XCELL	0.0268293	0.878409	0.910953
CHOL (n=36)	Macrophage M2_CIBERSORT	-0.457737	0.00569431	0.0119165
CHOL (n=36)	Macrophage M2_CIBERSORT-ABS	0.101888	0.560295	0.648251
CHOL (n=36)	Macrophage M2_QUANTISEQ	0.0049893	0.977307	0.983827
CHOL (n=36)	Macrophage M2_TIDE	-0.101998	0.559869	0.64802
CHOL (n=36)	Macrophage M2_XCELL	-0.320977	0.0601009	0.0992566
CHOL (n=36)	Macrophage_EPIC	-0.166772	0.338297	0.434932
CHOL (n=36)	Macrophage_TIMER	-0.0359186	0.837692	0.8762
CHOL (n=36)	Macrophage_XCELL	-0.312383	0.0677013	0.110347
CHOL (n=36)	Macrophage/Monocyte_MCPCOUNTER	0.229097	0.185563	0.261301
CHOL (n=36)	Myeloid dendritic cell activated_CIBERSORT	0.0798322	0.648483	0.727103
CHOL (n=36)	Myeloid dendritic cell activated_CIBERSORT-ABS	0.0907321	0.60421	0.686048
CHOL (n=36)	Myeloid dendritic cell activated_XCELL	0.323212	0.0582399	0.0965166
CHOL (n=36)	Myeloid dendritic cell resting_CIBERSORT	0.442485	0.00777521	0.0158433
CHOL (n=36)	Myeloid dendritic cell resting_CIBERSORT-ABS	0.450113	0.00666525	0.0137774
CHOL (n=36)	Myeloid dendritic cell_MCPCOUNTER	0.602219	0.000129419	0.000347419
CHOL (n=36)	Myeloid dendritic cell_QUANTISEQ	-0.18518	0.286876	0.378323
CHOL (n=36)	Myeloid dendritic cell_TIMER	0.289781	0.0913055	0.143123
CHOL (n=36)	Myeloid dendritic cell_XCELL	0.289167	0.0920241	0.1437
CHOL (n=36)	Neutrophil_CIBERSORT	0.00473635	0.978457	0.984639
CHOL (n=36)	Neutrophil_CIBERSORT-ABS	0.115698	0.50807	0.598737
CHOL (n=36)	Neutrophil_MCPCOUNTER	-0.154065	0.376883	0.47433
CHOL (n=36)	Neutrophil_QUANTISEQ	-0.162545	0.350857	0.448065
CHOL (n=36)	Neutrophil_TIMER	0.0705728	0.687055	0.760536
CHOL (n=36)	Neutrophil_XCELL	-0.251897	0.144351	0.210613
CHOL (n=36)	Plasmacytoid dendritic cell_XCELL	0.400471	0.0171297	0.0326791
CHOL (n=36)	T cell CD4+ (non-regulatory)_QUANTISEQ	-0.106295	0.543362	0.631207
CHOL (n=36)	T cell CD4+ (non-regulatory)_XCELL	0.301621	0.0782593	0.125346
CHOL (n=36)	T cell CD4+ central memory_XCELL	0.144175	0.408632	0.506424
CHOL (n=36)	T cell CD4+ effector memory_XCELL	0.151192	0.385954	0.484072
CHOL (n=36)	T cell CD4+ memory activated_CIBERSORT	-0.27928	0.104215	0.159488
CHOL (n=36)	T cell CD4+ memory activated_CIBERSORT-ABS	-0.27928	0.104215	0.159488
CHOL (n=36)	T cell CD4+ memory resting_CIBERSORT	0.0476559	0.785736	0.834954
CHOL (n=36)	T cell CD4+ memory resting_CIBERSORT-ABS	0.366578	0.0303128	0.0538509
CHOL (n=36)	T cell CD4+ memory_XCELL	0.284031	0.0982133	0.152122
CHOL (n=36)	T cell CD4+ naive_CIBERSORT	0.146372	0.401451	0.500291
CHOL (n=36)	T cell CD4+ naive_CIBERSORT-ABS	0.146372	0.401451	0.500291
CHOL (n=36)	T cell CD4+ naive_XCELL	0.346847	0.0412198	0.07102
CHOL (n=36)	T cell CD4+ Th1_XCELL	-0.0661655	0.705699	0.771934
CHOL (n=36)	T cell CD4+ Th2_XCELL	-0.160895	0.355834	0.45301
CHOL (n=36)	T cell CD4+_EPIC	0.318079	0.0625844	0.102766
CHOL (n=36)	T cell CD4+_TIMER	0.235759	0.172748	0.246648
CHOL (n=36)	T cell CD8+ central memory_XCELL	0.137278	0.431641	0.529985
CHOL (n=36)	T cell CD8+ effector memory_XCELL	0.0716627	0.682472	0.756339
CHOL (n=36)	T cell CD8+ naive_XCELL	-0.0525534	0.76431	0.817946
CHOL (n=36)	T cell CD8+_CIBERSORT	0.126357	0.469497	0.563941
CHOL (n=36)	T cell CD8+_CIBERSORT-ABS	0.261841	0.128646	0.191599
CHOL (n=36)	T cell CD8+_EPIC	0.128978	0.460257	0.557245
CHOL (n=36)	T cell CD8+_MCPCOUNTER	0.16873	0.332577	0.428346
CHOL (n=36)	T cell CD8+_QUANTISEQ	0.0731724	0.676142	0.751065
CHOL (n=36)	T cell CD8+_TIMER	0.0931663	0.594503	0.676902
CHOL (n=36)	T cell CD8+_XCELL	0.203867	0.240123	0.325039
COAD (n=458)	B cell memory_CIBERSORT	0.191441	0.00142379	0.00330259
COAD (n=458)	B cell memory_CIBERSORT-ABS	0.207779	0.000524632	0.00128888
COAD (n=458)	B cell memory_XCELL	0.40903	1.62345e-12	9.59677e-12
COAD (n=458)	B cell naive_CIBERSORT	0.0903479	0.135049	0.199683
COAD (n=458)	B cell naive_CIBERSORT-ABS	0.274253	3.91088e-06	1.3114e-05
COAD (n=458)	B cell naive_XCELL	0.165839	0.0058384	0.0121736
COAD (n=458)	B cell plasma_CIBERSORT	0.036403	0.547757	0.636054
COAD (n=458)	B cell plasma_CIBERSORT-ABS	0.245644	3.8173e-05	0.000112133
COAD (n=458)	B cell plasma_XCELL	0.288844	1.10267e-06	3.96655e-06
COAD (n=458)	B cell_EPIC	0.63271	3.67904e-32	6.71835e-31
COAD (n=458)	B cell_MCPCOUNTER	0.659721	9.82559e-36	2.16692e-34
COAD (n=458)	B cell_QUANTISEQ	0.477066	4.90607e-17	3.87485e-16
COAD (n=458)	B cell_TIMER	0.194957	0.00115604	0.00272338
COAD (n=458)	B cell_XCELL	0.521364	1.43783e-20	1.53816e-19
COAD (n=458)	Class-switched memory B cell_XCELL	0.548076	5.80927e-23	6.96869e-22
COAD (n=458)	Macrophage M0_CIBERSORT	-0.23707	7.18133e-05	0.000203649
COAD (n=458)	Macrophage M0_CIBERSORT-ABS	0.086691	0.151641	0.219906
COAD (n=458)	Macrophage M1_CIBERSORT	0.21251	0.000387219	0.000966194
COAD (n=458)	Macrophage M1_CIBERSORT-ABS	0.403011	3.66101e-12	2.09922e-11
COAD (n=458)	Macrophage M1_QUANTISEQ	0.174326	0.00373232	0.00809423
COAD (n=458)	Macrophage M1_XCELL	0.342685	5.39497e-09	2.36504e-08
COAD (n=458)	Macrophage M2_CIBERSORT	0.0894753	0.138875	0.204392
COAD (n=458)	Macrophage M2_CIBERSORT-ABS	0.416275	5.9693e-13	3.63354e-12
COAD (n=458)	Macrophage M2_QUANTISEQ	0.343609	4.87803e-09	2.1549e-08
COAD (n=458)	Macrophage M2_TIDE	-0.193289	8.86642e-05	0.00024608
COAD (n=458)	Macrophage M2_XCELL	0.117537	0.0515337	0.086706
COAD (n=458)	Macrophage_EPIC	0.349636	2.50959e-09	1.14025e-08
COAD (n=458)	Macrophage_TIMER	0.0944784	0.118027	0.177722
COAD (n=458)	Macrophage_XCELL	0.251641	2.42015e-05	7.34239e-05
COAD (n=458)	Macrophage/Monocyte_MCPCOUNTER	0.353367	1.65118e-09	7.67251e-09
COAD (n=458)	Myeloid dendritic cell activated_CIBERSORT	0.0302802	0.617098	0.698468
COAD (n=458)	Myeloid dendritic cell activated_CIBERSORT-ABS	0.0519523	0.390789	0.489442
COAD (n=458)	Myeloid dendritic cell activated_XCELL	0.499485	9.26544e-19	8.62468e-18
COAD (n=458)	Myeloid dendritic cell resting_CIBERSORT	0.00830269	0.890984	0.920854
COAD (n=458)	Myeloid dendritic cell resting_CIBERSORT-ABS	0.0693279	0.251872	0.338069
COAD (n=458)	Myeloid dendritic cell_MCPCOUNTER	0.43866	2.32051e-14	1.56171e-13
COAD (n=458)	Myeloid dendritic cell_QUANTISEQ	0.016058	0.790935	0.837783
COAD (n=458)	Myeloid dendritic cell_TIMER	0.366651	3.55722e-10	1.74037e-09
COAD (n=458)	Myeloid dendritic cell_XCELL	0.462875	5.22984e-16	3.87441e-15
COAD (n=458)	Neutrophil_CIBERSORT	-0.00776793	0.897966	0.926067
COAD (n=458)	Neutrophil_CIBERSORT-ABS	0.0298566	0.622033	0.702694
COAD (n=458)	Neutrophil_MCPCOUNTER	0.357028	1.08923e-09	5.1447e-09
COAD (n=458)	Neutrophil_QUANTISEQ	0.160231	0.00776203	0.0158277
COAD (n=458)	Neutrophil_TIMER	0.331163	1.84157e-08	7.74161e-08
COAD (n=458)	Neutrophil_XCELL	0.128057	0.0337826	0.05942
COAD (n=458)	Plasmacytoid dendritic cell_XCELL	0.154332	0.0103764	0.0207455
COAD (n=458)	T cell CD4+ (non-regulatory)_QUANTISEQ	0.0125102	0.836384	0.875151
COAD (n=458)	T cell CD4+ (non-regulatory)_XCELL	-0.0249529	0.680357	0.754534
COAD (n=458)	T cell CD4+ central memory_XCELL	-0.0465466	0.442019	0.539263
COAD (n=458)	T cell CD4+ effector memory_XCELL	0.269759	5.69347e-06	1.86551e-05
COAD (n=458)	T cell CD4+ memory activated_CIBERSORT	-0.0719206	0.234528	0.318821
COAD (n=458)	T cell CD4+ memory activated_CIBERSORT-ABS	-0.0330787	0.584929	0.669458
COAD (n=458)	T cell CD4+ memory resting_CIBERSORT	0.134931	0.0252452	0.0458961
COAD (n=458)	T cell CD4+ memory resting_CIBERSORT-ABS	0.489325	5.80505e-18	5.01298e-17
COAD (n=458)	T cell CD4+ memory_XCELL	0.141427	0.0189544	0.0356576
COAD (n=458)	T cell CD4+ naive_CIBERSORT	0.0167518	0.782125	0.832351
COAD (n=458)	T cell CD4+ naive_CIBERSORT-ABS	0.0170605	0.778213	0.829846
COAD (n=458)	T cell CD4+ naive_XCELL	0.26621	7.62328e-06	2.47239e-05
COAD (n=458)	T cell CD4+ Th1_XCELL	-0.16999	0.00470269	0.0100392
COAD (n=458)	T cell CD4+ Th2_XCELL	-0.0160981	0.790425	0.837783
COAD (n=458)	T cell CD4+_EPIC	0.358354	9.35697e-10	4.44883e-09
COAD (n=458)	T cell CD4+_TIMER	0.366262	3.72443e-10	1.81598e-09
COAD (n=458)	T cell CD8+ central memory_XCELL	0.405492	2.62358e-12	1.52263e-11
COAD (n=458)	T cell CD8+ effector memory_XCELL	0.115816	0.0550729	0.0919592
COAD (n=458)	T cell CD8+ naive_XCELL	-0.161242	0.00737821	0.0151095
COAD (n=458)	T cell CD8+_CIBERSORT	0.279535	2.49366e-06	8.54161e-06
COAD (n=458)	T cell CD8+_CIBERSORT-ABS	0.517549	3.03844e-20	3.20209e-19
COAD (n=458)	T cell CD8+_EPIC	0.118536	0.0495684	0.0838423
COAD (n=458)	T cell CD8+_MCPCOUNTER	0.331231	1.82872e-08	7.69888e-08
COAD (n=458)	T cell CD8+_QUANTISEQ	0.351919	1.94372e-09	8.91625e-09
COAD (n=458)	T cell CD8+_TIMER	0.186668	0.0018784	0.00426395
COAD (n=458)	T cell CD8+_XCELL	0.252773	2.21778e-05	6.80769e-05
DLBC (n=48)	B cell memory_CIBERSORT	0.103714	0.518733	0.610011
DLBC (n=48)	B cell memory_CIBERSORT-ABS	0.15866	0.321787	0.417449
DLBC (n=48)	B cell memory_XCELL	0.473244	0.00177846	0.00405313
DLBC (n=48)	B cell naive_CIBERSORT	0.199996	0.209948	0.290502
DLBC (n=48)	B cell naive_CIBERSORT-ABS	0.295881	0.0603444	0.0993734
DLBC (n=48)	B cell naive_XCELL	0.287584	0.0682701	0.111084
DLBC (n=48)	B cell plasma_CIBERSORT	0.0289144	0.857581	0.894393
DLBC (n=48)	B cell plasma_CIBERSORT-ABS	0.0270398	0.866728	0.901309
DLBC (n=48)	B cell plasma_XCELL	0.0372493	0.817147	0.859729
DLBC (n=48)	B cell_EPIC	0.410063	0.00775123	0.0158169
DLBC (n=48)	B cell_MCPCOUNTER	0.373129	0.0162701	0.0312225
DLBC (n=48)	B cell_QUANTISEQ	0.601125	3.23708e-05	9.6373e-05
DLBC (n=48)	B cell_TIMER	-0.121942	0.44755	0.545083
DLBC (n=48)	B cell_XCELL	0.346987	0.0262393	0.0474026
DLBC (n=48)	Class-switched memory B cell_XCELL	0.380223	0.0141984	0.0276165
DLBC (n=48)	Macrophage M0_CIBERSORT	-0.0540342	0.737223	0.79669
DLBC (n=48)	Macrophage M0_CIBERSORT-ABS	-0.11141	0.488011	0.581477
DLBC (n=48)	Macrophage M1_CIBERSORT	0.00235936	0.988319	0.991432
DLBC (n=48)	Macrophage M1_CIBERSORT-ABS	0.0992199	0.537105	0.626732
DLBC (n=48)	Macrophage M1_QUANTISEQ	-0.209762	0.188076	0.26445
DLBC (n=48)	Macrophage M1_XCELL	-0.233933	0.140995	0.206874
DLBC (n=48)	Macrophage M2_CIBERSORT	-0.0229112	0.886934	0.917661
DLBC (n=48)	Macrophage M2_CIBERSORT-ABS	0.0769575	0.632479	0.712223
DLBC (n=48)	Macrophage M2_QUANTISEQ	-0.117353	0.464951	0.560561
DLBC (n=48)	Macrophage M2_TIDE	0.119748	0.455826	0.552347
DLBC (n=48)	Macrophage M2_XCELL	-0.239065	0.132236	0.19613
DLBC (n=48)	Macrophage_EPIC	-0.063424	0.693618	0.763379
DLBC (n=48)	Macrophage_TIMER	-0.174252	0.275884	0.366185
DLBC (n=48)	Macrophage_XCELL	-0.17453	0.275105	0.36532
DLBC (n=48)	Macrophage/Monocyte_MCPCOUNTER	-0.0579068	0.719131	0.781218
DLBC (n=48)	Myeloid dendritic cell activated_CIBERSORT	-0.332035	0.0339308	0.0596442
DLBC (n=48)	Myeloid dendritic cell activated_CIBERSORT-ABS	-0.328049	0.0362678	0.063325
DLBC (n=48)	Myeloid dendritic cell activated_XCELL	-0.110842	0.490246	0.583269
DLBC (n=48)	Myeloid dendritic cell resting_CIBERSORT	0.131392	0.412866	0.51065
DLBC (n=48)	Myeloid dendritic cell resting_CIBERSORT-ABS	0.139688	0.38372	0.482089
DLBC (n=48)	Myeloid dendritic cell_MCPCOUNTER	-0.0487477	0.762146	0.816849
DLBC (n=48)	Myeloid dendritic cell_QUANTISEQ	-0.300847	0.0559624	0.0932273
DLBC (n=48)	Myeloid dendritic cell_TIMER	0.0161387	0.920226	0.942582
DLBC (n=48)	Myeloid dendritic cell_XCELL	-0.267003	0.0914936	0.14334
DLBC (n=48)	Neutrophil_CIBERSORT	-0.121959	0.447488	0.545083
DLBC (n=48)	Neutrophil_CIBERSORT-ABS	-0.0922855	0.566057	0.653439
DLBC (n=48)	Neutrophil_MCPCOUNTER	0.108605	0.499097	0.591042
DLBC (n=48)	Neutrophil_QUANTISEQ	-0.0853809	0.595579	0.677858
DLBC (n=48)	Neutrophil_TIMER	0.0246981	0.878179	0.910953
DLBC (n=48)	Neutrophil_XCELL	-0.266725	0.0918434	0.143652
DLBC (n=48)	Plasmacytoid dendritic cell_XCELL	-0.0207335	0.897621	0.926067
DLBC (n=48)	T cell CD4+ (non-regulatory)_QUANTISEQ	-0.121532	0.449092	0.545802
DLBC (n=48)	T cell CD4+ (non-regulatory)_XCELL	-0.189144	0.23626	0.320719
DLBC (n=48)	T cell CD4+ central memory_XCELL	-0.197309	0.216264	0.297947
DLBC (n=48)	T cell CD4+ effector memory_XCELL	-0.399642	0.00963414	0.0193696
DLBC (n=48)	T cell CD4+ memory activated_CIBERSORT	-0.0295143	0.854658	0.891668
DLBC (n=48)	T cell CD4+ memory activated_CIBERSORT-ABS	-0.00501969	0.975152	0.982002
DLBC (n=48)	T cell CD4+ memory resting_CIBERSORT	-0.0717886	0.655574	0.733905
DLBC (n=48)	T cell CD4+ memory resting_CIBERSORT-ABS	-0.0793153	0.622057	0.702694
DLBC (n=48)	T cell CD4+ memory_XCELL	0.0588257	0.71486	0.778983
DLBC (n=48)	T cell CD4+ naive_CIBERSORT	0.0124481	0.938429	0.956784
DLBC (n=48)	T cell CD4+ naive_CIBERSORT-ABS	0.0165975	0.917966	0.940604
DLBC (n=48)	T cell CD4+ naive_XCELL	0.0280974	0.861566	0.897242
DLBC (n=48)	T cell CD4+ Th1_XCELL	0.0868087	0.589419	0.672869
DLBC (n=48)	T cell CD4+ Th2_XCELL	0.172887	0.27972	0.369907
DLBC (n=48)	T cell CD4+_EPIC	-0.201821	0.205731	0.285632
DLBC (n=48)	T cell CD4+_TIMER	0.121705	0.448441	0.545306
DLBC (n=48)	T cell CD8+ central memory_XCELL	0.156573	0.328274	0.423918
DLBC (n=48)	T cell CD8+ effector memory_XCELL	0.221303	0.164371	0.235509
DLBC (n=48)	T cell CD8+ naive_XCELL	0.266389	0.0922688	0.144004
DLBC (n=48)	T cell CD8+_CIBERSORT	0.141765	0.376619	0.47433
DLBC (n=48)	T cell CD8+_CIBERSORT-ABS	0.178558	0.264005	0.351884
DLBC (n=48)	T cell CD8+_EPIC	0.112109	0.485268	0.578729
DLBC (n=48)	T cell CD8+_MCPCOUNTER	0.254528	0.108285	0.16496
DLBC (n=48)	T cell CD8+_QUANTISEQ	0.112514	0.483684	0.577079
DLBC (n=48)	T cell CD8+_TIMER	0.00624218	0.969103	0.980118
DLBC (n=48)	T cell CD8+_XCELL	0.118044	0.46231	0.559023
ESCA (n=185)	B cell memory_CIBERSORT	0.431396	1.48576e-09	6.92632e-09
ESCA (n=185)	B cell memory_CIBERSORT-ABS	0.438001	7.79877e-10	3.72651e-09
ESCA (n=185)	B cell memory_XCELL	0.52105	6.45014e-14	4.18384e-13
ESCA (n=185)	B cell naive_CIBERSORT	0.230801	0.00182616	0.00415855
ESCA (n=185)	B cell naive_CIBERSORT-ABS	0.31746	1.40957e-05	4.45071e-05
ESCA (n=185)	B cell naive_XCELL	0.343713	2.31254e-06	7.97841e-06
ESCA (n=185)	B cell plasma_CIBERSORT	0.0772662	0.302562	0.396456
ESCA (n=185)	B cell plasma_CIBERSORT-ABS	0.234865	0.00150559	0.00346989
ESCA (n=185)	B cell plasma_XCELL	0.390098	6.18859e-08	2.51313e-07
ESCA (n=185)	B cell_EPIC	0.691943	5.59755e-27	8.22984e-26
ESCA (n=185)	B cell_MCPCOUNTER	0.711793	4.09577e-29	6.7486e-28
ESCA (n=185)	B cell_QUANTISEQ	0.64898	6.71906e-23	8.02648e-22
ESCA (n=185)	B cell_TIMER	0.576051	2.66429e-17	2.16389e-16
ESCA (n=185)	B cell_XCELL	0.52519	3.76509e-14	2.50453e-13
ESCA (n=185)	Class-switched memory B cell_XCELL	0.417177	5.68228e-09	2.47585e-08
ESCA (n=185)	Macrophage M0_CIBERSORT	-0.300852	4.06561e-05	0.000118698
ESCA (n=185)	Macrophage M0_CIBERSORT-ABS	-0.0749053	0.317619	0.413321
ESCA (n=185)	Macrophage M1_CIBERSORT	0.130821	0.080041	0.1277
ESCA (n=185)	Macrophage M1_CIBERSORT-ABS	0.335293	4.20514e-06	1.40188e-05
ESCA (n=185)	Macrophage M1_QUANTISEQ	0.0084154	0.910728	0.934189
ESCA (n=185)	Macrophage M1_XCELL	0.113966	0.127676	0.190352
ESCA (n=185)	Macrophage M2_CIBERSORT	-0.175801	0.018245	0.0345271
ESCA (n=185)	Macrophage M2_CIBERSORT-ABS	0.228048	0.00207737	0.00468963
ESCA (n=185)	Macrophage M2_QUANTISEQ	0.170225	0.0223362	0.041235
ESCA (n=185)	Macrophage M2_TIDE	-0.0410196	0.584563	0.669307
ESCA (n=185)	Macrophage M2_XCELL	0.203269	0.00620454	0.0128995
ESCA (n=185)	Macrophage_EPIC	0.20786	0.00511106	0.0107904
ESCA (n=185)	Macrophage_TIMER	0.153041	0.0402621	0.0694951
ESCA (n=185)	Macrophage_XCELL	0.0650025	0.385974	0.484072
ESCA (n=185)	Macrophage/Monocyte_MCPCOUNTER	0.120349	0.10756	0.163942
ESCA (n=185)	Myeloid dendritic cell activated_CIBERSORT	-0.189456	0.0108583	0.0216185
ESCA (n=185)	Myeloid dendritic cell activated_CIBERSORT-ABS	-0.0651048	0.385225	0.483555
ESCA (n=185)	Myeloid dendritic cell activated_XCELL	0.285423	0.000102849	0.000281631
ESCA (n=185)	Myeloid dendritic cell resting_CIBERSORT	-0.151422	0.0424483	0.0728302
ESCA (n=185)	Myeloid dendritic cell resting_CIBERSORT-ABS	-0.100176	0.180895	0.256491
ESCA (n=185)	Myeloid dendritic cell_MCPCOUNTER	0.312261	1.97731e-05	6.10221e-05
ESCA (n=185)	Myeloid dendritic cell_QUANTISEQ	0.0627048	0.403022	0.501505
ESCA (n=185)	Myeloid dendritic cell_TIMER	0.0579003	0.440085	0.537361
ESCA (n=185)	Myeloid dendritic cell_XCELL	0.156495	0.0359129	0.0627819
ESCA (n=185)	Neutrophil_CIBERSORT	-0.112715	0.131938	0.195891
ESCA (n=185)	Neutrophil_CIBERSORT-ABS	-0.0624127	0.405221	0.503584
ESCA (n=185)	Neutrophil_MCPCOUNTER	-0.0846757	0.258408	0.345549
ESCA (n=185)	Neutrophil_QUANTISEQ	0.0288148	0.700996	0.768548
ESCA (n=185)	Neutrophil_TIMER	0.0709875	0.343661	0.441234
ESCA (n=185)	Neutrophil_XCELL	-0.142056	0.0571373	0.0949088
ESCA (n=185)	Plasmacytoid dendritic cell_XCELL	0.220128	0.00298517	0.00658852
ESCA (n=185)	T cell CD4+ (non-regulatory)_QUANTISEQ	-0.235118	0.00148746	0.00343362
ESCA (n=185)	T cell CD4+ (non-regulatory)_XCELL	0.117002	0.117773	0.177526
ESCA (n=185)	T cell CD4+ central memory_XCELL	-0.0373222	0.618897	0.699952
ESCA (n=185)	T cell CD4+ effector memory_XCELL	0.149161	0.0456669	0.0777477
ESCA (n=185)	T cell CD4+ memory activated_CIBERSORT	0.0588768	0.432399	0.530688
ESCA (n=185)	T cell CD4+ memory activated_CIBERSORT-ABS	0.0915177	0.221764	0.304355
ESCA (n=185)	T cell CD4+ memory resting_CIBERSORT	0.214486	0.00383634	0.00830098
ESCA (n=185)	T cell CD4+ memory resting_CIBERSORT-ABS	0.461667	6.89224e-11	3.58622e-10
ESCA (n=185)	T cell CD4+ memory_XCELL	0.163426	0.0283744	0.0508434
ESCA (n=185)	T cell CD4+ naive_CIBERSORT	-0.172611	0.020498	0.0382105
ESCA (n=185)	T cell CD4+ naive_CIBERSORT-ABS	-0.172611	0.020498	0.0382105
ESCA (n=185)	T cell CD4+ naive_XCELL	0.313481	1.82745e-05	5.68255e-05
ESCA (n=185)	T cell CD4+ Th1_XCELL	-0.0844439	0.259719	0.346978
ESCA (n=185)	T cell CD4+ Th2_XCELL	-0.226126	0.00227095	0.00509056
ESCA (n=185)	T cell CD4+_EPIC	-0.022764	0.761644	0.816617
ESCA (n=185)	T cell CD4+_TIMER	0.3188	1.2905e-05	4.07924e-05
ESCA (n=185)	T cell CD8+ central memory_XCELL	0.359034	7.44384e-07	2.72909e-06
ESCA (n=185)	T cell CD8+ effector memory_XCELL	0.0672083	0.370025	0.467546
ESCA (n=185)	T cell CD8+ naive_XCELL	-0.0908203	0.225321	0.308204
ESCA (n=185)	T cell CD8+_CIBERSORT	0.315345	1.61892e-05	5.07262e-05
ESCA (n=185)	T cell CD8+_CIBERSORT-ABS	0.480287	8.92573e-12	4.91172e-11
ESCA (n=185)	T cell CD8+_EPIC	0.142218	0.0568512	0.0945432
ESCA (n=185)	T cell CD8+_MCPCOUNTER	0.484195	5.72072e-12	3.2286e-11
ESCA (n=185)	T cell CD8+_QUANTISEQ	0.365084	4.67913e-07	1.74448e-06
ESCA (n=185)	T cell CD8+_TIMER	0.143729	0.0542414	0.0909416
ESCA (n=185)	T cell CD8+_XCELL	0.149352	0.045388	0.0773187
GBM (n=153)	B cell memory_CIBERSORT	0.0619518	0.472033	0.566242
GBM (n=153)	B cell memory_CIBERSORT-ABS	0.0736003	0.392697	0.491214
GBM (n=153)	B cell memory_XCELL	0.109602	0.202329	0.281405
GBM (n=153)	B cell naive_CIBERSORT	0.0312124	0.717298	0.780749
GBM (n=153)	B cell naive_CIBERSORT-ABS	0.0791083	0.35815	0.455351
GBM (n=153)	B cell naive_XCELL	-0.185929	0.0296073	0.0528543
GBM (n=153)	B cell plasma_CIBERSORT	-0.0350428	0.684352	0.758128
GBM (n=153)	B cell plasma_CIBERSORT-ABS	0.0332861	0.699392	0.767378
GBM (n=153)	B cell plasma_XCELL	-0.263843	0.0018376	0.00417795
GBM (n=153)	B cell_EPIC	0.123502	0.150486	0.218342
GBM (n=153)	B cell_MCPCOUNTER	0.210226	0.0136745	0.0267427
GBM (n=153)	B cell_QUANTISEQ	-0.0264789	0.758735	0.814717
GBM (n=153)	B cell_TIMER	0.259977	0.00215493	0.00485325
GBM (n=153)	B cell_XCELL	0.212288	0.0127579	0.025087
GBM (n=153)	Class-switched memory B cell_XCELL	0.176753	0.038811	0.0673146
GBM (n=153)	Macrophage M0_CIBERSORT	-0.140716	0.100981	0.155903
GBM (n=153)	Macrophage M0_CIBERSORT-ABS	-0.130594	0.128239	0.191092
GBM (n=153)	Macrophage M1_CIBERSORT	0.0343431	0.690328	0.762065
GBM (n=153)	Macrophage M1_CIBERSORT-ABS	0.114429	0.183038	0.258126
GBM (n=153)	Macrophage M1_QUANTISEQ	0.290539	0.000572918	0.00140269
GBM (n=153)	Macrophage M1_XCELL	0.254896	0.00264741	0.00588837
GBM (n=153)	Macrophage M2_CIBERSORT	-0.0189887	0.825684	0.866168
GBM (n=153)	Macrophage M2_CIBERSORT-ABS	0.289887	0.000590301	0.00143911
GBM (n=153)	Macrophage M2_QUANTISEQ	0.213179	0.0123788	0.0244591
GBM (n=153)	Macrophage M2_TIDE	-0.352374	2.41181e-05	7.32484e-05
GBM (n=153)	Macrophage M2_XCELL	0.152092	0.0760276	0.12225
GBM (n=153)	Macrophage_EPIC	0.227088	0.00761678	0.0155647
GBM (n=153)	Macrophage_TIMER	0.166679	0.0515709	0.0867178
GBM (n=153)	Macrophage_XCELL	0.158362	0.0645622	0.105711
GBM (n=153)	Macrophage/Monocyte_MCPCOUNTER	0.203836	0.0168887	0.0322583
GBM (n=153)	Myeloid dendritic cell activated_CIBERSORT	0.0967001	0.260966	0.348315
GBM (n=153)	Myeloid dendritic cell activated_CIBERSORT-ABS	0.102994	0.231051	0.314243
GBM (n=153)	Myeloid dendritic cell activated_XCELL	0.0944572	0.272239	0.36185
GBM (n=153)	Myeloid dendritic cell resting_CIBERSORT	-0.06651	0.439995	0.537361
GBM (n=153)	Myeloid dendritic cell resting_CIBERSORT-ABS	-0.0645813	0.453398	0.550103
GBM (n=153)	Myeloid dendritic cell_MCPCOUNTER	0.198406	0.0201168	0.0375977
GBM (n=153)	Myeloid dendritic cell_QUANTISEQ	-0.0728702	0.397422	0.496475
GBM (n=153)	Myeloid dendritic cell_TIMER	0.393443	1.97274e-06	6.90578e-06
GBM (n=153)	Myeloid dendritic cell_XCELL	-0.0633719	0.461918	0.558784
GBM (n=153)	Neutrophil_CIBERSORT	0.0438204	0.611138	0.692543
GBM (n=153)	Neutrophil_CIBERSORT-ABS	0.0615288	0.475069	0.56917
GBM (n=153)	Neutrophil_MCPCOUNTER	0.0723611	0.400736	0.499961
GBM (n=153)	Neutrophil_QUANTISEQ	-0.0222736	0.796138	0.841019
GBM (n=153)	Neutrophil_TIMER	0.313167	0.000194456	0.000506362
GBM (n=153)	Neutrophil_XCELL	0.0266176	0.757511	0.814012
GBM (n=153)	Plasmacytoid dendritic cell_XCELL	0.0579403	0.50125	0.593101
GBM (n=153)	T cell CD4+ (non-regulatory)_QUANTISEQ	-0.066974	0.436804	0.534493
GBM (n=153)	T cell CD4+ (non-regulatory)_XCELL	-0.0556951	0.518005	0.609405
GBM (n=153)	T cell CD4+ central memory_XCELL	-0.0289852	0.736701	0.796451
GBM (n=153)	T cell CD4+ effector memory_XCELL	0.114582	0.182448	0.257547
GBM (n=153)	T cell CD4+ memory activated_CIBERSORT	0.132689	0.122176	0.183201
GBM (n=153)	T cell CD4+ memory activated_CIBERSORT-ABS	0.132342	0.123165	0.184109
GBM (n=153)	T cell CD4+ memory resting_CIBERSORT	0.0435835	0.613068	0.694455
GBM (n=153)	T cell CD4+ memory resting_CIBERSORT-ABS	0.175749	0.0399503	0.0690131
GBM (n=153)	T cell CD4+ memory_XCELL	0.0755064	0.380522	0.478699
GBM (n=153)	T cell CD4+ naive_CIBERSORT	0.072184	0.401893	0.500534
GBM (n=153)	T cell CD4+ naive_CIBERSORT-ABS	0.0736428	0.392423	0.491086
GBM (n=153)	T cell CD4+ naive_XCELL	-0.0647986	0.451877	0.548954
GBM (n=153)	T cell CD4+ Th1_XCELL	0.028536	0.740635	0.799173
GBM (n=153)	T cell CD4+ Th2_XCELL	-0.0084871	0.92159	0.943046
GBM (n=153)	T cell CD4+_EPIC	0.104431	0.224572	0.307524
GBM (n=153)	T cell CD4+_TIMER	0.190165	0.0260285	0.047111
GBM (n=153)	T cell CD8+ central memory_XCELL	0.0226864	0.792444	0.83819
GBM (n=153)	T cell CD8+ effector memory_XCELL	-0.00306644	0.971631	0.980868
GBM (n=153)	T cell CD8+ naive_XCELL	-0.114462	0.182911	0.258074
GBM (n=153)	T cell CD8+_CIBERSORT	-0.0811506	0.345836	0.443356
GBM (n=153)	T cell CD8+_CIBERSORT-ABS	0.0375508	0.663093	0.739998
GBM (n=153)	T cell CD8+_EPIC	0.00114509	0.989404	0.992173
GBM (n=153)	T cell CD8+_MCPCOUNTER	0.193156	0.023731	0.0434185
GBM (n=153)	T cell CD8+_QUANTISEQ	0.0333286	0.699027	0.767378
GBM (n=153)	T cell CD8+_TIMER	0.0572505	0.506367	0.597429
GBM (n=153)	T cell CD8+_XCELL	0.0705267	0.412815	0.51065
HNSC (n=522)	B cell memory_CIBERSORT	0.27012	1.12999e-09	5.3284e-09
HNSC (n=522)	B cell memory_CIBERSORT-ABS	0.314047	1.00853e-12	6.04905e-12
HNSC (n=522)	B cell memory_XCELL	0.469157	2.6953e-28	4.2693e-27
HNSC (n=522)	B cell naive_CIBERSORT	0.307451	3.12862e-12	1.80842e-11
HNSC (n=522)	B cell naive_CIBERSORT-ABS	0.357273	2.93576e-16	2.22667e-15
HNSC (n=522)	B cell naive_XCELL	0.261614	3.83786e-09	1.72193e-08
HNSC (n=522)	B cell plasma_CIBERSORT	-0.0847971	0.0601771	0.0993252
HNSC (n=522)	B cell plasma_CIBERSORT-ABS	0.239209	7.84867e-08	3.16486e-07
HNSC (n=522)	B cell plasma_XCELL	0.333824	2.84969e-14	1.90889e-13
HNSC (n=522)	B cell_EPIC	0.619988	1.3919e-53	6.23526e-52
HNSC (n=522)	B cell_MCPCOUNTER	0.697778	5.16065e-73	7.39779e-71
HNSC (n=522)	B cell_QUANTISEQ	0.700011	1.154e-73	1.74133e-71
HNSC (n=522)	B cell_TIMER	-0.0661515	0.142871	0.208772
HNSC (n=522)	B cell_XCELL	0.648163	5.78599e-60	3.60618e-58
HNSC (n=522)	Class-switched memory B cell_XCELL	0.593191	4.34601e-48	1.53827e-46
HNSC (n=522)	Macrophage M0_CIBERSORT	-0.332725	3.49829e-14	2.3379e-13
HNSC (n=522)	Macrophage M0_CIBERSORT-ABS	0.0826818	0.0668851	0.10914
HNSC (n=522)	Macrophage M1_CIBERSORT	0.258912	5.60902e-09	2.44765e-08
HNSC (n=522)	Macrophage M1_CIBERSORT-ABS	0.565154	7.26517e-43	2.14735e-41
HNSC (n=522)	Macrophage M1_QUANTISEQ	0.122189	0.00665627	0.0137688
HNSC (n=522)	Macrophage M1_XCELL	0.362748	9.53826e-17	7.43103e-16
HNSC (n=522)	Macrophage M2_CIBERSORT	0.0318351	0.48111	0.575445
HNSC (n=522)	Macrophage M2_CIBERSORT-ABS	0.540775	1.03235e-38	2.5737e-37
HNSC (n=522)	Macrophage M2_QUANTISEQ	0.403432	1.10911e-20	1.19993e-19
HNSC (n=522)	Macrophage M2_TIDE	-0.148827	0.000928951	0.00220838
HNSC (n=522)	Macrophage M2_XCELL	0.187539	2.83365e-05	8.51581e-05
HNSC (n=522)	Macrophage_EPIC	0.469983	2.10892e-28	3.3778e-27
HNSC (n=522)	Macrophage_TIMER	0.0827297	0.0667269	0.108944
HNSC (n=522)	Macrophage_XCELL	0.283075	1.61398e-10	8.10383e-10
HNSC (n=522)	Macrophage/Monocyte_MCPCOUNTER	0.424977	5.3722e-23	6.49878e-22
HNSC (n=522)	Myeloid dendritic cell activated_CIBERSORT	-0.166835	0.000201408	0.000523002
HNSC (n=522)	Myeloid dendritic cell activated_CIBERSORT-ABS	-0.0133164	0.768274	0.821575
HNSC (n=522)	Myeloid dendritic cell activated_XCELL	0.677389	2.43508e-67	2.40737e-65
HNSC (n=522)	Myeloid dendritic cell resting_CIBERSORT	0.0798555	0.0767934	0.12327
HNSC (n=522)	Myeloid dendritic cell resting_CIBERSORT-ABS	0.267122	1.7473e-09	8.07986e-09
HNSC (n=522)	Myeloid dendritic cell_MCPCOUNTER	0.679231	7.81209e-68	7.99903e-66
HNSC (n=522)	Myeloid dendritic cell_QUANTISEQ	0.0785979	0.0815703	0.129851
HNSC (n=522)	Myeloid dendritic cell_TIMER	0.133844	0.00293318	0.00647877
HNSC (n=522)	Myeloid dendritic cell_XCELL	0.541274	8.55515e-39	2.15155e-37
HNSC (n=522)	Neutrophil_CIBERSORT	-0.0918251	0.0417602	0.0718646
HNSC (n=522)	Neutrophil_CIBERSORT-ABS	-0.0016623	0.970662	0.980868
HNSC (n=522)	Neutrophil_MCPCOUNTER	0.0792932	0.0789004	0.126091
HNSC (n=522)	Neutrophil_QUANTISEQ	0.143303	0.00143762	0.00332927
HNSC (n=522)	Neutrophil_TIMER	0.511429	3.82467e-34	7.88872e-33
HNSC (n=522)	Neutrophil_XCELL	-0.12545	0.00532704	0.0111969
HNSC (n=522)	Plasmacytoid dendritic cell_XCELL	0.502159	8.62739e-33	1.63806e-31
HNSC (n=522)	T cell CD4+ (non-regulatory)_QUANTISEQ	-0.316589	6.4707e-13	3.9304e-12
HNSC (n=522)	T cell CD4+ (non-regulatory)_XCELL	0.172805	0.000117034	0.000316244
HNSC (n=522)	T cell CD4+ central memory_XCELL	-0.0784046	0.0823256	0.130836
HNSC (n=522)	T cell CD4+ effector memory_XCELL	0.108999	0.0155727	0.0300047
HNSC (n=522)	T cell CD4+ memory activated_CIBERSORT	0.127849	0.00450744	0.0096511
HNSC (n=522)	T cell CD4+ memory activated_CIBERSORT-ABS	0.19078	2.04311e-05	6.29173e-05
HNSC (n=522)	T cell CD4+ memory resting_CIBERSORT	0.17848	6.86785e-05	0.000195339
HNSC (n=522)	T cell CD4+ memory resting_CIBERSORT-ABS	0.437311	2.12732e-24	2.78495e-23
HNSC (n=522)	T cell CD4+ memory_XCELL	0.321525	2.69984e-13	1.69005e-12
HNSC (n=522)	T cell CD4+ naive_CIBERSORT	-0.231487	2.07749e-07	8.07069e-07
HNSC (n=522)	T cell CD4+ naive_CIBERSORT-ABS	-0.231091	2.18202e-07	8.46527e-07
HNSC (n=522)	T cell CD4+ naive_XCELL	0.430353	1.33663e-23	1.67342e-22
HNSC (n=522)	T cell CD4+ Th1_XCELL	0.0677675	0.133341	0.197361
HNSC (n=522)	T cell CD4+ Th2_XCELL	0.124721	0.00560162	0.0117397
HNSC (n=522)	T cell CD4+_EPIC	0.0847468	0.0603299	0.0993734
HNSC (n=522)	T cell CD4+_TIMER	0.426089	4.03754e-23	4.9258e-22
HNSC (n=522)	T cell CD8+ central memory_XCELL	0.608238	4.14385e-51	1.65006e-49
HNSC (n=522)	T cell CD8+ effector memory_XCELL	0.288923	6.48381e-11	3.37983e-10
HNSC (n=522)	T cell CD8+ naive_XCELL	-0.0089281	0.843409	0.881536
HNSC (n=522)	T cell CD8+_CIBERSORT	0.41607	5.09887e-22	5.84739e-21
HNSC (n=522)	T cell CD8+_CIBERSORT-ABS	0.656596	5.22946e-62	3.6568e-60
HNSC (n=522)	T cell CD8+_EPIC	0.188401	2.59898e-05	7.84343e-05
HNSC (n=522)	T cell CD8+_MCPCOUNTER	0.645859	2.03964e-59	1.17022e-57
HNSC (n=522)	T cell CD8+_QUANTISEQ	0.594444	2.46996e-48	8.96376e-47
HNSC (n=522)	T cell CD8+_TIMER	-0.211666	2.17104e-06	7.51736e-06
HNSC (n=522)	T cell CD8+_XCELL	0.451125	4.87161e-26	6.84652e-25
HNSC-HPV- (n=422)	B cell memory_CIBERSORT	0.193565	9.77578e-05	0.000268717
HNSC-HPV- (n=422)	B cell memory_CIBERSORT-ABS	0.232897	2.4985e-06	8.54798e-06
HNSC-HPV- (n=422)	B cell memory_XCELL	0.387502	8.82798e-16	6.45658e-15
HNSC-HPV- (n=422)	B cell naive_CIBERSORT	0.294205	1.98577e-09	9.09458e-09
HNSC-HPV- (n=422)	B cell naive_CIBERSORT-ABS	0.33693	4.48779e-12	2.55288e-11
HNSC-HPV- (n=422)	B cell naive_XCELL	0.194412	9.09787e-05	0.000252015
HNSC-HPV- (n=422)	B cell plasma_CIBERSORT	-0.0793999	0.112846	0.171451
HNSC-HPV- (n=422)	B cell plasma_CIBERSORT-ABS	0.208967	2.52165e-05	7.61809e-05
HNSC-HPV- (n=422)	B cell plasma_XCELL	0.219687	9.23793e-06	2.97252e-05
HNSC-HPV- (n=422)	B cell_EPIC	0.554811	1.14663e-33	2.33148e-32
HNSC-HPV- (n=422)	B cell_MCPCOUNTER	0.664183	3.10176e-52	1.32727e-50
HNSC-HPV- (n=422)	B cell_QUANTISEQ	0.619048	1.10717e-43	3.45028e-42
HNSC-HPV- (n=422)	B cell_TIMER	-0.0717532	0.152024	0.220016
HNSC-HPV- (n=422)	B cell_XCELL	0.571764	4.24922e-36	9.51759e-35
HNSC-HPV- (n=422)	Class-switched memory B cell_XCELL	0.518286	7.05825e-29	1.15634e-27
HNSC-HPV- (n=422)	Macrophage M0_CIBERSORT	-0.301427	7.58514e-10	3.63049e-09
HNSC-HPV- (n=422)	Macrophage M0_CIBERSORT-ABS	0.0989243	0.0480252	0.0815205
HNSC-HPV- (n=422)	Macrophage M1_CIBERSORT	0.243184	8.54283e-07	3.12402e-06
HNSC-HPV- (n=422)	Macrophage M1_CIBERSORT-ABS	0.524534	1.1755e-29	1.98244e-28
HNSC-HPV- (n=422)	Macrophage M1_QUANTISEQ	0.108366	0.0302406	0.053784
HNSC-HPV- (n=422)	Macrophage M1_XCELL	0.427507	3.33697e-19	3.1997e-18
HNSC-HPV- (n=422)	Macrophage M2_CIBERSORT	0.182278	0.000247443	0.000633975
HNSC-HPV- (n=422)	Macrophage M2_CIBERSORT-ABS	0.604907	2.79198e-41	7.69675e-40
HNSC-HPV- (n=422)	Macrophage M2_QUANTISEQ	0.414668	4.70128e-18	4.08441e-17
HNSC-HPV- (n=422)	Macrophage M2_TIDE	-0.178239	0.000340508	0.000856348
HNSC-HPV- (n=422)	Macrophage M2_XCELL	0.211803	1.94276e-05	6.00612e-05
HNSC-HPV- (n=422)	Macrophage_EPIC	0.477054	4.00302e-24	5.16966e-23
HNSC-HPV- (n=422)	Macrophage_TIMER	0.217265	1.16424e-05	3.69644e-05
HNSC-HPV- (n=422)	Macrophage_XCELL	0.361914	7.9971e-14	5.15229e-13
HNSC-HPV- (n=422)	Macrophage/Monocyte_MCPCOUNTER	0.423701	7.39805e-19	6.95416e-18
HNSC-HPV- (n=422)	Myeloid dendritic cell activated_CIBERSORT	-0.123523	0.0134286	0.0263156
HNSC-HPV- (n=422)	Myeloid dendritic cell activated_CIBERSORT-ABS	0.026922	0.59137	0.674407
HNSC-HPV- (n=422)	Myeloid dendritic cell activated_XCELL	0.651466	1.12009e-49	4.17052e-48
HNSC-HPV- (n=422)	Myeloid dendritic cell resting_CIBERSORT	0.086776	0.0830317	0.131812
HNSC-HPV- (n=422)	Myeloid dendritic cell resting_CIBERSORT-ABS	0.257543	1.7595e-07	6.8726e-07
HNSC-HPV- (n=422)	Myeloid dendritic cell_MCPCOUNTER	0.636449	8.23106e-47	2.77629e-45
HNSC-HPV- (n=422)	Myeloid dendritic cell_QUANTISEQ	0.0736406	0.141508	0.207414
HNSC-HPV- (n=422)	Myeloid dendritic cell_TIMER	0.218091	1.07626e-05	3.42468e-05
HNSC-HPV- (n=422)	Myeloid dendritic cell_XCELL	0.552369	2.50131e-33	4.98003e-32
HNSC-HPV- (n=422)	Neutrophil_CIBERSORT	-0.0218311	0.66334	0.739998
HNSC-HPV- (n=422)	Neutrophil_CIBERSORT-ABS	0.0773531	0.122459	0.183528
HNSC-HPV- (n=422)	Neutrophil_MCPCOUNTER	0.160879	0.00124414	0.00291863
HNSC-HPV- (n=422)	Neutrophil_QUANTISEQ	0.193477	9.84853e-05	0.000270457
HNSC-HPV- (n=422)	Neutrophil_TIMER	0.479794	2.02339e-24	2.66104e-23
HNSC-HPV- (n=422)	Neutrophil_XCELL	-0.0969872	0.0525934	0.0883853
HNSC-HPV- (n=422)	Plasmacytoid dendritic cell_XCELL	0.430468	1.78382e-19	1.76353e-18
HNSC-HPV- (n=422)	T cell CD4+ (non-regulatory)_QUANTISEQ	-0.184016	0.000215217	0.00055488
HNSC-HPV- (n=422)	T cell CD4+ (non-regulatory)_XCELL	0.105413	0.0350718	0.0615367
HNSC-HPV- (n=422)	T cell CD4+ central memory_XCELL	0.0375744	0.453615	0.550133
HNSC-HPV- (n=422)	T cell CD4+ effector memory_XCELL	0.173345	0.000496857	0.00122379
HNSC-HPV- (n=422)	T cell CD4+ memory activated_CIBERSORT	0.0786821	0.116147	0.175444
HNSC-HPV- (n=422)	T cell CD4+ memory activated_CIBERSORT-ABS	0.137788	0.00577469	0.0120671
HNSC-HPV- (n=422)	T cell CD4+ memory resting_CIBERSORT	0.219827	9.11503e-06	2.93957e-05
HNSC-HPV- (n=422)	T cell CD4+ memory resting_CIBERSORT-ABS	0.466205	5.61882e-23	6.76855e-22
HNSC-HPV- (n=422)	T cell CD4+ memory_XCELL	0.286492	5.39028e-09	2.36504e-08
HNSC-HPV- (n=422)	T cell CD4+ naive_CIBERSORT	-0.228755	3.79666e-06	1.27758e-05
HNSC-HPV- (n=422)	T cell CD4+ naive_CIBERSORT-ABS	-0.22866	3.83282e-06	1.28824e-05
HNSC-HPV- (n=422)	T cell CD4+ naive_XCELL	0.364585	5.08971e-14	3.33918e-13
HNSC-HPV- (n=422)	T cell CD4+ Th1_XCELL	0.0209878	0.675591	0.750744
HNSC-HPV- (n=422)	T cell CD4+ Th2_XCELL	0.0675396	0.177625	0.252605
HNSC-HPV- (n=422)	T cell CD4+_EPIC	0.0840531	0.0931962	0.145293
HNSC-HPV- (n=422)	T cell CD4+_TIMER	0.345687	1.13912e-12	6.80389e-12
HNSC-HPV- (n=422)	T cell CD8+ central memory_XCELL	0.524184	1.30074e-29	2.18083e-28
HNSC-HPV- (n=422)	T cell CD8+ effector memory_XCELL	0.249609	4.26285e-07	1.59968e-06
HNSC-HPV- (n=422)	T cell CD8+ naive_XCELL	-0.078247	0.118185	0.177867
HNSC-HPV- (n=422)	T cell CD8+_CIBERSORT	0.328641	1.5798e-11	8.51372e-11
HNSC-HPV- (n=422)	T cell CD8+_CIBERSORT-ABS	0.591926	3.52502e-39	9.02343e-38
HNSC-HPV- (n=422)	T cell CD8+_EPIC	0.0211499	0.673228	0.748699
HNSC-HPV- (n=422)	T cell CD8+_MCPCOUNTER	0.567509	1.78553e-35	3.87812e-34
HNSC-HPV- (n=422)	T cell CD8+_QUANTISEQ	0.510156	6.88342e-28	1.06101e-26
HNSC-HPV- (n=422)	T cell CD8+_TIMER	-0.147301	0.00314784	0.00689447
HNSC-HPV- (n=422)	T cell CD8+_XCELL	0.36836	2.6676e-14	1.7911e-13
HNSC-HPV+ (n=98)	B cell memory_CIBERSORT	0.421722	3.85535e-05	0.000112904
HNSC-HPV+ (n=98)	B cell memory_CIBERSORT-ABS	0.457866	6.43787e-06	2.10221e-05
HNSC-HPV+ (n=98)	B cell memory_XCELL	0.648385	6.43582e-12	3.59678e-11
HNSC-HPV+ (n=98)	B cell naive_CIBERSORT	0.295318	0.00496043	0.0105111
HNSC-HPV+ (n=98)	B cell naive_CIBERSORT-ABS	0.384018	0.000203107	0.0005265
HNSC-HPV+ (n=98)	B cell naive_XCELL	0.436397	1.91021e-05	5.91424e-05
HNSC-HPV+ (n=98)	B cell plasma_CIBERSORT	-0.111719	0.297263	0.390404
HNSC-HPV+ (n=98)	B cell plasma_CIBERSORT-ABS	0.199756	0.0605433	0.0995855
HNSC-HPV+ (n=98)	B cell plasma_XCELL	0.49242	9.51011e-07	3.44696e-06
HNSC-HPV+ (n=98)	B cell_EPIC	0.696101	3.65667e-14	2.43806e-13
HNSC-HPV+ (n=98)	B cell_MCPCOUNTER	0.685051	1.32121e-13	8.38034e-13
HNSC-HPV+ (n=98)	B cell_QUANTISEQ	0.834605	3.00015e-24	3.89205e-23
HNSC-HPV+ (n=98)	B cell_TIMER	-0.0376181	0.726342	0.787305
HNSC-HPV+ (n=98)	B cell_XCELL	0.744914	5.79453e-17	4.55148e-16
HNSC-HPV+ (n=98)	Class-switched memory B cell_XCELL	0.769936	1.1689e-18	1.07411e-17
HNSC-HPV+ (n=98)	Macrophage M0_CIBERSORT	-0.199807	0.0604759	0.0995318
HNSC-HPV+ (n=98)	Macrophage M0_CIBERSORT-ABS	0.161802	0.129809	0.19303
HNSC-HPV+ (n=98)	Macrophage M1_CIBERSORT	0.196285	0.065249	0.106653
HNSC-HPV+ (n=98)	Macrophage M1_CIBERSORT-ABS	0.571928	4.78497e-09	2.12143e-08
HNSC-HPV+ (n=98)	Macrophage M1_QUANTISEQ	0.215312	0.0427275	0.0732215
HNSC-HPV+ (n=98)	Macrophage M1_XCELL	0.11649	0.276976	0.367295
HNSC-HPV+ (n=98)	Macrophage M2_CIBERSORT	-0.503511	4.91793e-07	1.82876e-06
HNSC-HPV+ (n=98)	Macrophage M2_CIBERSORT-ABS	0.174265	0.102407	0.157703
HNSC-HPV+ (n=98)	Macrophage M2_QUANTISEQ	0.370212	0.000355663	0.000890555
HNSC-HPV+ (n=98)	Macrophage M2_TIDE	-0.067458	0.529927	0.62077
HNSC-HPV+ (n=98)	Macrophage M2_XCELL	0.0294175	0.784346	0.834404
HNSC-HPV+ (n=98)	Macrophage_EPIC	0.357563	0.000581652	0.00142044
HNSC-HPV+ (n=98)	Macrophage_TIMER	-0.268376	0.0109939	0.0218734
HNSC-HPV+ (n=98)	Macrophage_XCELL	-0.00370086	0.972542	0.980888
HNSC-HPV+ (n=98)	Macrophage/Monocyte_MCPCOUNTER	0.405767	7.98005e-05	0.000224743
HNSC-HPV+ (n=98)	Myeloid dendritic cell activated_CIBERSORT	-0.330505	0.00155996	0.00358654
HNSC-HPV+ (n=98)	Myeloid dendritic cell activated_CIBERSORT-ABS	-0.180977	0.0896506	0.140872
HNSC-HPV+ (n=98)	Myeloid dendritic cell activated_XCELL	0.703794	1.44411e-14	9.78784e-14
HNSC-HPV+ (n=98)	Myeloid dendritic cell resting_CIBERSORT	0.101098	0.345837	0.443356
HNSC-HPV+ (n=98)	Myeloid dendritic cell resting_CIBERSORT-ABS	0.271782	0.00998259	0.0200281
HNSC-HPV+ (n=98)	Myeloid dendritic cell_MCPCOUNTER	0.750198	2.64091e-17	2.15099e-16
HNSC-HPV+ (n=98)	Myeloid dendritic cell_QUANTISEQ	0.00382771	0.971601	0.980868
HNSC-HPV+ (n=98)	Myeloid dendritic cell_TIMER	0.0387076	0.718743	0.781218
HNSC-HPV+ (n=98)	Myeloid dendritic cell_XCELL	0.388952	0.000165249	0.000437459
HNSC-HPV+ (n=98)	Neutrophil_CIBERSORT	-0.303085	0.00388789	0.00839984
HNSC-HPV+ (n=98)	Neutrophil_CIBERSORT-ABS	-0.251899	0.0172491	0.0328811
HNSC-HPV+ (n=98)	Neutrophil_MCPCOUNTER	-0.143299	0.180346	0.255839
HNSC-HPV+ (n=98)	Neutrophil_QUANTISEQ	-0.0372899	0.728637	0.789494
HNSC-HPV+ (n=98)	Neutrophil_TIMER	0.562377	9.73785e-09	4.16072e-08
HNSC-HPV+ (n=98)	Neutrophil_XCELL	-0.0593331	0.580728	0.666413
HNSC-HPV+ (n=98)	Plasmacytoid dendritic cell_XCELL	0.694332	4.50922e-14	2.98567e-13
HNSC-HPV+ (n=98)	T cell CD4+ (non-regulatory)_QUANTISEQ	-0.499157	6.38883e-07	2.35124e-06
HNSC-HPV+ (n=98)	T cell CD4+ (non-regulatory)_XCELL	0.374668	0.00029764	0.000753829
HNSC-HPV+ (n=98)	T cell CD4+ central memory_XCELL	-0.196547	0.0648837	0.106116
HNSC-HPV+ (n=98)	T cell CD4+ effector memory_XCELL	-0.0359993	0.737682	0.796886
HNSC-HPV+ (n=98)	T cell CD4+ memory activated_CIBERSORT	0.105066	0.327139	0.423052
HNSC-HPV+ (n=98)	T cell CD4+ memory activated_CIBERSORT-ABS	0.185513	0.0817663	0.130091
HNSC-HPV+ (n=98)	T cell CD4+ memory resting_CIBERSORT	0.0385753	0.719664	0.781218
HNSC-HPV+ (n=98)	T cell CD4+ memory resting_CIBERSORT-ABS	0.299003	0.00442251	0.00947633
HNSC-HPV+ (n=98)	T cell CD4+ memory_XCELL	0.345561	0.000910764	0.00217054
HNSC-HPV+ (n=98)	T cell CD4+ naive_CIBERSORT	-0.20964	0.0486379	0.0824143
HNSC-HPV+ (n=98)	T cell CD4+ naive_CIBERSORT-ABS	-0.208115	0.0503381	0.0849937
HNSC-HPV+ (n=98)	T cell CD4+ naive_XCELL	0.607587	2.7276e-10	1.34134e-09
HNSC-HPV+ (n=98)	T cell CD4+ Th1_XCELL	0.0934973	0.383485	0.482004
HNSC-HPV+ (n=98)	T cell CD4+ Th2_XCELL	0.190203	0.074206	0.119656
HNSC-HPV+ (n=98)	T cell CD4+_EPIC	0.05586	0.603106	0.685065
HNSC-HPV+ (n=98)	T cell CD4+_TIMER	0.605574	3.23686e-10	1.58906e-09
HNSC-HPV+ (n=98)	T cell CD8+ central memory_XCELL	0.762672	3.8132e-18	3.34326e-17
HNSC-HPV+ (n=98)	T cell CD8+ effector memory_XCELL	0.403778	8.71527e-05	0.000242354
HNSC-HPV+ (n=98)	T cell CD8+ naive_XCELL	0.246487	0.0198841	0.0372843
HNSC-HPV+ (n=98)	T cell CD8+_CIBERSORT	0.512103	2.9029e-07	1.10968e-06
HNSC-HPV+ (n=98)	T cell CD8+_CIBERSORT-ABS	0.745792	5.09244e-17	4.01099e-16
HNSC-HPV+ (n=98)	T cell CD8+_EPIC	0.705066	1.23506e-14	8.45087e-14
HNSC-HPV+ (n=98)	T cell CD8+_MCPCOUNTER	0.788037	5.03679e-20	5.13896e-19
HNSC-HPV+ (n=98)	T cell CD8+_QUANTISEQ	0.759412	6.39538e-18	5.50618e-17
HNSC-HPV+ (n=98)	T cell CD8+_TIMER	-0.259215	0.0141693	0.0276162
HNSC-HPV+ (n=98)	T cell CD8+_XCELL	0.655019	3.31444e-12	1.91197e-11
KICH (n=66)	B cell memory_CIBERSORT	0.243454	0.0506761	0.0854637
KICH (n=66)	B cell memory_CIBERSORT-ABS	0.243454	0.0506761	0.0854637
KICH (n=66)	B cell memory_XCELL	0.178674	0.154431	0.222938
KICH (n=66)	B cell naive_CIBERSORT	-0.168843	0.178782	0.253998
KICH (n=66)	B cell naive_CIBERSORT-ABS	0.156163	0.21415	0.295603
KICH (n=66)	B cell naive_XCELL	0.194146	0.121222	0.181932
KICH (n=66)	B cell plasma_CIBERSORT	-0.33508	0.00636332	0.0132105
KICH (n=66)	B cell plasma_CIBERSORT-ABS	-0.0474784	0.707238	0.773322
KICH (n=66)	B cell plasma_XCELL	-0.085087	0.500371	0.592305
KICH (n=66)	B cell_EPIC	0.12591	0.317599	0.413321
KICH (n=66)	B cell_MCPCOUNTER	0.392998	0.00120228	0.00282767
KICH (n=66)	B cell_QUANTISEQ	0.177208	0.157896	0.227253
KICH (n=66)	B cell_TIMER	0.585027	3.09109e-07	1.17224e-06
KICH (n=66)	B cell_XCELL	0.395561	0.00110881	0.00261859
KICH (n=66)	Class-switched memory B cell_XCELL	0.220278	0.0778659	0.124786
KICH (n=66)	Macrophage M0_CIBERSORT	0.135724	0.281029	0.371296
KICH (n=66)	Macrophage M0_CIBERSORT-ABS	0.197111	0.115531	0.174699
KICH (n=66)	Macrophage M1_CIBERSORT	0.25216	0.0427229	0.0732215
KICH (n=66)	Macrophage M1_CIBERSORT-ABS	0.4997	2.25695e-05	6.9131e-05
KICH (n=66)	Macrophage M1_QUANTISEQ	0.332265	0.00684852	0.0141054
KICH (n=66)	Macrophage M1_XCELL	0.361829	0.00306041	0.00672352
KICH (n=66)	Macrophage M2_CIBERSORT	0.19316	0.12316	0.184109
KICH (n=66)	Macrophage M2_CIBERSORT-ABS	0.647714	5.48694e-09	2.40169e-08
KICH (n=66)	Macrophage M2_QUANTISEQ	0.177771	0.156558	0.225781
KICH (n=66)	Macrophage M2_TIDE	-0.477331	5.80896e-05	0.00016671
KICH (n=66)	Macrophage M2_XCELL	0.166047	0.186191	0.262056
KICH (n=66)	Macrophage_EPIC	0.487291	3.84424e-05	0.000112694
KICH (n=66)	Macrophage_TIMER	0.455991	0.000134929	0.000361535
KICH (n=66)	Macrophage_XCELL	0.386836	0.00145674	0.00336812
KICH (n=66)	Macrophage/Monocyte_MCPCOUNTER	0.460749	0.000112352	0.000304742
KICH (n=66)	Myeloid dendritic cell activated_CIBERSORT	-0.175507	0.161992	0.232447
KICH (n=66)	Myeloid dendritic cell activated_CIBERSORT-ABS	-0.0865905	0.492802	0.585279
KICH (n=66)	Myeloid dendritic cell activated_XCELL	0.517438	1.01603e-05	3.25108e-05
KICH (n=66)	Myeloid dendritic cell resting_CIBERSORT	0.0677218	0.59195	0.674799
KICH (n=66)	Myeloid dendritic cell resting_CIBERSORT-ABS	0.0713463	0.572229	0.658339
KICH (n=66)	Myeloid dendritic cell_MCPCOUNTER	0.503912	1.87484e-05	5.81099e-05
KICH (n=66)	Myeloid dendritic cell_QUANTISEQ	-0.117342	0.351901	0.4488
KICH (n=66)	Myeloid dendritic cell_TIMER	0.656003	2.99975e-09	1.35437e-08
KICH (n=66)	Myeloid dendritic cell_XCELL	0.451834	0.000157993	0.000419414
KICH (n=66)	Neutrophil_CIBERSORT	0.239138	0.0550448	0.0919592
KICH (n=66)	Neutrophil_CIBERSORT-ABS	0.283768	0.0219791	0.0406543
KICH (n=66)	Neutrophil_MCPCOUNTER	0.247823	0.0465456	0.0791496
KICH (n=66)	Neutrophil_QUANTISEQ	0.204484	0.102274	0.157645
KICH (n=66)	Neutrophil_TIMER	0.488301	3.68396e-05	0.000108662
KICH (n=66)	Neutrophil_XCELL	-0.092466	0.463808	0.559418
KICH (n=66)	Plasmacytoid dendritic cell_XCELL	0.0792814	0.530152	0.62077
KICH (n=66)	T cell CD4+ (non-regulatory)_QUANTISEQ	-0.0560372	0.657499	0.735486
KICH (n=66)	T cell CD4+ (non-regulatory)_XCELL	-0.0956496	0.448493	0.545306
KICH (n=66)	T cell CD4+ central memory_XCELL	-0.509521	1.45882e-05	4.59103e-05
KICH (n=66)	T cell CD4+ effector memory_XCELL	-0.0221912	0.860717	0.896771
KICH (n=66)	T cell CD4+ memory activated_CIBERSORT	NA	NA	NA
KICH (n=66)	T cell CD4+ memory activated_CIBERSORT-ABS	NA	NA	NA
KICH (n=66)	T cell CD4+ memory resting_CIBERSORT	0.217815	0.0813338	0.129619
KICH (n=66)	T cell CD4+ memory resting_CIBERSORT-ABS	0.592088	2.04803e-07	7.96703e-07
KICH (n=66)	T cell CD4+ memory_XCELL	0.469226	8.05303e-05	0.00022591
KICH (n=66)	T cell CD4+ naive_CIBERSORT	-0.236051	0.0583541	0.0965943
KICH (n=66)	T cell CD4+ naive_CIBERSORT-ABS	-0.236051	0.0583541	0.0965943
KICH (n=66)	T cell CD4+ naive_XCELL	0.15288	0.224059	0.307211
KICH (n=66)	T cell CD4+ Th1_XCELL	-0.361392	0.00309874	0.00680251
KICH (n=66)	T cell CD4+ Th2_XCELL	0.214474	0.086232	0.136138
KICH (n=66)	T cell CD4+_EPIC	0.259753	0.0366563	0.0639645
KICH (n=66)	T cell CD4+_TIMER	-0.0114422	0.927919	0.947079
KICH (n=66)	T cell CD8+ central memory_XCELL	0.365489	0.00275521	0.00611867
KICH (n=66)	T cell CD8+ effector memory_XCELL	-0.0297083	0.81427	0.85705
KICH (n=66)	T cell CD8+ naive_XCELL	-0.126736	0.314407	0.409915
KICH (n=66)	T cell CD8+_CIBERSORT	0.189362	0.130848	0.194474
KICH (n=66)	T cell CD8+_CIBERSORT-ABS	0.467415	8.65321e-05	0.000240862
KICH (n=66)	T cell CD8+_EPIC	0.129754	0.302927	0.396572
KICH (n=66)	T cell CD8+_MCPCOUNTER	0.419128	0.000510797	0.00125704
KICH (n=66)	T cell CD8+_QUANTISEQ	0.296253	0.0165666	0.0317278
KICH (n=66)	T cell CD8+_TIMER	0.351019	0.00414478	0.00892794
KICH (n=66)	T cell CD8+_XCELL	0.231548	0.0634697	0.1041
KIRC (n=533)	B cell memory_CIBERSORT	0.268381	4.78476e-09	2.12143e-08
KIRC (n=533)	B cell memory_CIBERSORT-ABS	0.275837	1.70531e-09	7.91121e-09
KIRC (n=533)	B cell memory_XCELL	0.173361	0.00018368	0.000481927
KIRC (n=533)	B cell naive_CIBERSORT	-0.0838206	0.0721795	0.116848
KIRC (n=533)	B cell naive_CIBERSORT-ABS	-0.00751752	0.872115	0.906583
KIRC (n=533)	B cell naive_XCELL	0.222286	1.43435e-06	5.12116e-06
KIRC (n=533)	B cell plasma_CIBERSORT	-0.0342503	0.46319	0.559418
KIRC (n=533)	B cell plasma_CIBERSORT-ABS	0.217658	2.39006e-06	8.23595e-06
KIRC (n=533)	B cell plasma_XCELL	0.208582	6.30034e-06	2.06199e-05
KIRC (n=533)	B cell_EPIC	0.2399	1.85593e-07	7.23939e-07
KIRC (n=533)	B cell_MCPCOUNTER	0.574746	6.98289e-42	2.02222e-40
KIRC (n=533)	B cell_QUANTISEQ	0.404609	1.38094e-19	1.3747e-18
KIRC (n=533)	B cell_TIMER	0.0729118	0.117979	0.177722
KIRC (n=533)	B cell_XCELL	0.398876	4.93983e-19	4.72083e-18
KIRC (n=533)	Class-switched memory B cell_XCELL	0.409991	4.08037e-20	4.23856e-19
KIRC (n=533)	Macrophage M0_CIBERSORT	0.0147274	0.752482	0.809214
KIRC (n=533)	Macrophage M0_CIBERSORT-ABS	0.0316731	0.497535	0.589923
KIRC (n=533)	Macrophage M1_CIBERSORT	0.147649	0.00147785	0.00341418
KIRC (n=533)	Macrophage M1_CIBERSORT-ABS	0.383878	1.23518e-17	1.0385e-16
KIRC (n=533)	Macrophage M1_QUANTISEQ	0.475012	2.53377e-27	3.7639e-26
KIRC (n=533)	Macrophage M1_XCELL	0.390656	2.94279e-18	2.604e-17
KIRC (n=533)	Macrophage M2_CIBERSORT	-0.113206	0.0150213	0.0290595
KIRC (n=533)	Macrophage M2_CIBERSORT-ABS	0.304294	2.47799e-11	1.31563e-10
KIRC (n=533)	Macrophage M2_QUANTISEQ	0.349268	1.13347e-14	7.79297e-14
KIRC (n=533)	Macrophage M2_TIDE	-0.417151	7.78469e-21	8.55123e-20
KIRC (n=533)	Macrophage M2_XCELL	0.297429	7.18215e-11	3.71683e-10
KIRC (n=533)	Macrophage_EPIC	0.466597	2.66758e-26	3.82397e-25
KIRC (n=533)	Macrophage_TIMER	0.0421964	0.366028	0.464288
KIRC (n=533)	Macrophage_XCELL	0.379471	3.0839e-17	2.49761e-16
KIRC (n=533)	Macrophage/Monocyte_MCPCOUNTER	0.28223	6.86668e-10	3.30315e-09
KIRC (n=533)	Myeloid dendritic cell activated_CIBERSORT	-0.174039	0.000173108	0.00045574
KIRC (n=533)	Myeloid dendritic cell activated_CIBERSORT-ABS	-0.168906	0.000269562	0.000685744
KIRC (n=533)	Myeloid dendritic cell activated_XCELL	0.58845	2.70851e-44	8.72505e-43
KIRC (n=533)	Myeloid dendritic cell resting_CIBERSORT	0.242827	1.30056e-07	5.15725e-07
KIRC (n=533)	Myeloid dendritic cell resting_CIBERSORT-ABS	0.251956	4.16386e-08	1.72014e-07
KIRC (n=533)	Myeloid dendritic cell_MCPCOUNTER	0.295157	1.01523e-10	5.18837e-10
KIRC (n=533)	Myeloid dendritic cell_QUANTISEQ	-0.0719024	0.123167	0.184109
KIRC (n=533)	Myeloid dendritic cell_TIMER	0.435753	8.70237e-23	1.03098e-21
KIRC (n=533)	Myeloid dendritic cell_XCELL	0.463465	6.30053e-26	8.81153e-25
KIRC (n=533)	Neutrophil_CIBERSORT	0.0826986	0.0760909	0.122283
KIRC (n=533)	Neutrophil_CIBERSORT-ABS	0.12664	0.0064756	0.0134338
KIRC (n=533)	Neutrophil_MCPCOUNTER	-0.0693971	0.136812	0.202082
KIRC (n=533)	Neutrophil_QUANTISEQ	-0.0675328	0.147699	0.21506
KIRC (n=533)	Neutrophil_TIMER	0.430821	2.94375e-22	3.40312e-21
KIRC (n=533)	Neutrophil_XCELL	-0.0757619	0.104249	0.159488
KIRC (n=533)	Plasmacytoid dendritic cell_XCELL	0.308873	1.19957e-11	6.56329e-11
KIRC (n=533)	T cell CD4+ (non-regulatory)_QUANTISEQ	-0.179022	0.000111279	0.000302117
KIRC (n=533)	T cell CD4+ (non-regulatory)_XCELL	-0.0887806	0.0568075	0.0945254
KIRC (n=533)	T cell CD4+ central memory_XCELL	-0.0730823	0.11712	0.17682
KIRC (n=533)	T cell CD4+ effector memory_XCELL	0.455352	5.60712e-25	7.54723e-24
KIRC (n=533)	T cell CD4+ memory activated_CIBERSORT	0.0536046	0.250704	0.336975
KIRC (n=533)	T cell CD4+ memory activated_CIBERSORT-ABS	0.0547914	0.240351	0.325194
KIRC (n=533)	T cell CD4+ memory resting_CIBERSORT	0.0436901	0.349291	0.446662
KIRC (n=533)	T cell CD4+ memory resting_CIBERSORT-ABS	0.295567	9.53998e-11	4.88413e-10
KIRC (n=533)	T cell CD4+ memory_XCELL	0.0734787	0.115141	0.174292
KIRC (n=533)	T cell CD4+ naive_CIBERSORT	-0.062299	0.181784	0.257116
KIRC (n=533)	T cell CD4+ naive_CIBERSORT-ABS	-0.062299	0.181784	0.257116
KIRC (n=533)	T cell CD4+ naive_XCELL	0.200049	1.50883e-05	4.73802e-05
KIRC (n=533)	T cell CD4+ Th1_XCELL	0.112439	0.0157231	0.0302742
KIRC (n=533)	T cell CD4+ Th2_XCELL	0.274342	2.10247e-09	9.58311e-09
KIRC (n=533)	T cell CD4+_EPIC	0.00314281	0.946346	0.963143
KIRC (n=533)	T cell CD4+_TIMER	0.174659	0.000163961	0.000434451
KIRC (n=533)	T cell CD8+ central memory_XCELL	0.420598	3.45686e-21	3.8866e-20
KIRC (n=533)	T cell CD8+ effector memory_XCELL	0.356257	3.0536e-15	2.16699e-14
KIRC (n=533)	T cell CD8+ naive_XCELL	0.0792907	0.0890371	0.140027
KIRC (n=533)	T cell CD8+_CIBERSORT	0.162268	0.000469114	0.00115844
KIRC (n=533)	T cell CD8+_CIBERSORT-ABS	0.351027	8.1737e-15	5.66038e-14
KIRC (n=533)	T cell CD8+_EPIC	0.1938	2.79516e-05	8.40895e-05
KIRC (n=533)	T cell CD8+_MCPCOUNTER	0.362864	8.57415e-16	6.28698e-15
KIRC (n=533)	T cell CD8+_QUANTISEQ	0.390521	3.02905e-18	2.67209e-17
KIRC (n=533)	T cell CD8+_TIMER	0.103924	0.0256598	0.0465317
KIRC (n=533)	T cell CD8+_XCELL	0.367219	3.65218e-16	2.74105e-15
KIRP (n=290)	B cell memory_CIBERSORT	0.293542	1.60093e-06	5.68756e-06
KIRP (n=290)	B cell memory_CIBERSORT-ABS	0.354902	4.49384e-09	2.0006e-08
KIRP (n=290)	B cell memory_XCELL	0.411215	5.99555e-12	3.37044e-11
KIRP (n=290)	B cell naive_CIBERSORT	0.0293762	0.638597	0.718356
KIRP (n=290)	B cell naive_CIBERSORT-ABS	0.10338	0.0975392	0.151323
KIRP (n=290)	B cell naive_XCELL	0.28471	3.36051e-06	1.13749e-05
KIRP (n=290)	B cell plasma_CIBERSORT	0.00343094	0.956265	0.970138
KIRP (n=290)	B cell plasma_CIBERSORT-ABS	0.254238	3.59728e-05	0.000106434
KIRP (n=290)	B cell plasma_XCELL	0.141169	0.0233372	0.0428347
KIRP (n=290)	B cell_EPIC	0.350141	7.43363e-09	3.21937e-08
KIRP (n=290)	B cell_MCPCOUNTER	0.500126	9.81537e-18	8.3752e-17
KIRP (n=290)	B cell_QUANTISEQ	0.400833	2.23676e-11	1.19197e-10
KIRP (n=290)	B cell_TIMER	0.520801	2.44145e-19	2.37276e-18
KIRP (n=290)	B cell_XCELL	0.435128	2.41788e-13	1.51686e-12
KIRP (n=290)	Class-switched memory B cell_XCELL	0.190767	0.00208667	0.0047069
KIRP (n=290)	Macrophage M0_CIBERSORT	0.141692	0.0228252	0.0420294
KIRP (n=290)	Macrophage M0_CIBERSORT-ABS	0.23065	0.000186001	0.000486111
KIRP (n=290)	Macrophage M1_CIBERSORT	0.34157	1.80192e-08	7.59721e-08
KIRP (n=290)	Macrophage M1_CIBERSORT-ABS	0.494508	2.56648e-17	2.09633e-16
KIRP (n=290)	Macrophage M1_QUANTISEQ	0.479229	3.21136e-16	2.42289e-15
KIRP (n=290)	Macrophage M1_XCELL	0.332805	4.33609e-08	1.78103e-07
KIRP (n=290)	Macrophage M2_CIBERSORT	-0.0749542	0.230223	0.313562
KIRP (n=290)	Macrophage M2_CIBERSORT-ABS	0.415695	3.34885e-12	1.92794e-11
KIRP (n=290)	Macrophage M2_QUANTISEQ	0.290823	2.0168e-06	7.02571e-06
KIRP (n=290)	Macrophage M2_TIDE	-0.508637	2.2113e-18	1.9874e-17
KIRP (n=290)	Macrophage M2_XCELL	0.083529	0.18106	0.256599
KIRP (n=290)	Macrophage_EPIC	0.322647	1.15972e-07	4.61153e-07
KIRP (n=290)	Macrophage_TIMER	0.177862	0.00415823	0.00895019
KIRP (n=290)	Macrophage_XCELL	0.240598	9.48895e-05	0.000261837
KIRP (n=290)	Macrophage/Monocyte_MCPCOUNTER	0.144915	0.0198757	0.0372843
KIRP (n=290)	Myeloid dendritic cell activated_CIBERSORT	-0.0336599	0.590449	0.673624
KIRP (n=290)	Myeloid dendritic cell activated_CIBERSORT-ABS	-0.0233697	0.708701	0.774037
KIRP (n=290)	Myeloid dendritic cell activated_XCELL	0.635017	1.56263e-30	2.69884e-29
KIRP (n=290)	Myeloid dendritic cell resting_CIBERSORT	0.195126	0.00163667	0.00375387
KIRP (n=290)	Myeloid dendritic cell resting_CIBERSORT-ABS	0.200052	0.00123607	0.00290239
KIRP (n=290)	Myeloid dendritic cell_MCPCOUNTER	0.52178	2.03651e-19	1.99954e-18
KIRP (n=290)	Myeloid dendritic cell_QUANTISEQ	0.0455164	0.466657	0.561673
KIRP (n=290)	Myeloid dendritic cell_TIMER	0.442568	8.44765e-14	5.43036e-13
KIRP (n=290)	Myeloid dendritic cell_XCELL	0.498051	1.40283e-17	1.176e-16
KIRP (n=290)	Neutrophil_CIBERSORT	0.183834	0.00303888	0.00668647
KIRP (n=290)	Neutrophil_CIBERSORT-ABS	0.239446	0.000102728	0.00028157
KIRP (n=290)	Neutrophil_MCPCOUNTER	-0.144147	0.0205467	0.0382764
KIRP (n=290)	Neutrophil_QUANTISEQ	-0.035897	0.565984	0.653439
KIRP (n=290)	Neutrophil_TIMER	0.491393	4.34081e-17	3.45697e-16
KIRP (n=290)	Neutrophil_XCELL	0.0188084	0.763668	0.817755
KIRP (n=290)	Plasmacytoid dendritic cell_XCELL	0.282184	4.13559e-06	1.3819e-05
KIRP (n=290)	T cell CD4+ (non-regulatory)_QUANTISEQ	-0.101559	0.103617	0.159031
KIRP (n=290)	T cell CD4+ (non-regulatory)_XCELL	0.213286	0.000562648	0.00137873
KIRP (n=290)	T cell CD4+ central memory_XCELL	-0.157171	0.0114709	0.0227592
KIRP (n=290)	T cell CD4+ effector memory_XCELL	0.246512	6.27359e-05	0.000179505
KIRP (n=290)	T cell CD4+ memory activated_CIBERSORT	0.0519313	0.406171	0.504328
KIRP (n=290)	T cell CD4+ memory activated_CIBERSORT-ABS	0.0519313	0.406171	0.504328
KIRP (n=290)	T cell CD4+ memory resting_CIBERSORT	-0.0758956	0.224405	0.307524
KIRP (n=290)	T cell CD4+ memory resting_CIBERSORT-ABS	0.401696	2.00831e-11	1.07824e-10
KIRP (n=290)	T cell CD4+ memory_XCELL	0.155782	0.0122316	0.0241849
KIRP (n=290)	T cell CD4+ naive_CIBERSORT	NA	NA	NA
KIRP (n=290)	T cell CD4+ naive_CIBERSORT-ABS	NA	NA	NA
KIRP (n=290)	T cell CD4+ naive_XCELL	0.146177	0.018815	0.0354419
KIRP (n=290)	T cell CD4+ Th1_XCELL	-0.173848	0.00510694	0.0107897
KIRP (n=290)	T cell CD4+ Th2_XCELL	0.257145	2.90463e-05	8.71997e-05
KIRP (n=290)	T cell CD4+_EPIC	0.111856	0.072879	0.117781
KIRP (n=290)	T cell CD4+_TIMER	0.230753	0.000184736	0.000483687
KIRP (n=290)	T cell CD8+ central memory_XCELL	0.433428	3.06377e-13	1.90539e-12
KIRP (n=290)	T cell CD8+ effector memory_XCELL	0.183304	0.00312581	0.0068567
KIRP (n=290)	T cell CD8+ naive_XCELL	0.0386549	0.536506	0.626361
KIRP (n=290)	T cell CD8+_CIBERSORT	0.296039	1.29223e-06	4.62525e-06
KIRP (n=290)	T cell CD8+_CIBERSORT-ABS	0.527362	7.16541e-20	7.23353e-19
KIRP (n=290)	T cell CD8+_EPIC	-0.0500787	0.423143	0.520666
KIRP (n=290)	T cell CD8+_MCPCOUNTER	0.538363	8.63543e-21	9.44953e-20
KIRP (n=290)	T cell CD8+_QUANTISEQ	0.504499	4.58816e-18	3.99825e-17
KIRP (n=290)	T cell CD8+_TIMER	0.428734	5.84918e-13	3.568e-12
KIRP (n=290)	T cell CD8+_XCELL	0.310508	3.58753e-07	1.35335e-06
LGG (n=516)	B cell memory_CIBERSORT	0.0524695	0.252235	0.338398
LGG (n=516)	B cell memory_CIBERSORT-ABS	0.0665519	0.146268	0.213193
LGG (n=516)	B cell memory_XCELL	-0.00278298	0.95161	0.967127
LGG (n=516)	B cell naive_CIBERSORT	-0.0447975	0.328399	0.423918
LGG (n=516)	B cell naive_CIBERSORT-ABS	0.062833	0.170223	0.243527
LGG (n=516)	B cell naive_XCELL	0.00701591	0.878406	0.910953
LGG (n=516)	B cell plasma_CIBERSORT	-0.23778	1.43538e-07	5.66056e-07
LGG (n=516)	B cell plasma_CIBERSORT-ABS	-0.0892604	0.0511399	0.0861445
LGG (n=516)	B cell plasma_XCELL	-0.212978	2.62472e-06	8.95841e-06
LGG (n=516)	B cell_EPIC	-0.124764	0.00630869	0.0131065
LGG (n=516)	B cell_MCPCOUNTER	0.126265	0.0057027	0.0119253
LGG (n=516)	B cell_QUANTISEQ	0.00113388	0.980274	0.985775
LGG (n=516)	B cell_TIMER	-0.0355618	0.437923	0.535177
LGG (n=516)	B cell_XCELL	0.169228	0.000201576	0.000523002
LGG (n=516)	Class-switched memory B cell_XCELL	0.07458	0.103407	0.158793
LGG (n=516)	Macrophage M0_CIBERSORT	0.000854993	0.985125	0.989428
LGG (n=516)	Macrophage M0_CIBERSORT-ABS	0.00153138	0.973361	0.980888
LGG (n=516)	Macrophage M1_CIBERSORT	0.260984	6.9688e-09	3.02262e-08
LGG (n=516)	Macrophage M1_CIBERSORT-ABS	0.318564	9.80131e-13	5.89106e-12
LGG (n=516)	Macrophage M1_QUANTISEQ	0.306304	7.67718e-12	4.24094e-11
LGG (n=516)	Macrophage M1_XCELL	0.355713	1.05336e-15	7.6649e-15
LGG (n=516)	Macrophage M2_CIBERSORT	0.173162	0.000141944	0.000379268
LGG (n=516)	Macrophage M2_CIBERSORT-ABS	0.374344	2.39213e-17	1.97076e-16
LGG (n=516)	Macrophage M2_QUANTISEQ	0.333884	6.53572e-14	4.22977e-13
LGG (n=516)	Macrophage M2_TIDE	-0.345301	7.85582e-15	5.46666e-14
LGG (n=516)	Macrophage M2_XCELL	0.265694	3.63318e-09	1.63265e-08
LGG (n=516)	Macrophage_EPIC	0.328408	1.75084e-13	1.10322e-12
LGG (n=516)	Macrophage_TIMER	0.0962001	0.0354995	0.0621728
LGG (n=516)	Macrophage_XCELL	0.314419	1.98647e-12	1.16705e-11
LGG (n=516)	Macrophage/Monocyte_MCPCOUNTER	-0.0478703	0.296274	0.389284
LGG (n=516)	Myeloid dendritic cell activated_CIBERSORT	-0.0125075	0.785046	0.834839
LGG (n=516)	Myeloid dendritic cell activated_CIBERSORT-ABS	-0.00606537	0.894777	0.924441
LGG (n=516)	Myeloid dendritic cell activated_XCELL	0.387286	1.48835e-18	1.36329e-17
LGG (n=516)	Myeloid dendritic cell resting_CIBERSORT	0.0687922	0.133133	0.197155
LGG (n=516)	Myeloid dendritic cell resting_CIBERSORT-ABS	0.0775802	0.0902148	0.141646
LGG (n=516)	Myeloid dendritic cell_MCPCOUNTER	0.322751	4.74748e-13	2.91457e-12
LGG (n=516)	Myeloid dendritic cell_QUANTISEQ	0.164666	0.000299864	0.000758792
LGG (n=516)	Myeloid dendritic cell_TIMER	0.303533	1.2065e-11	6.58866e-11
LGG (n=516)	Myeloid dendritic cell_XCELL	0.0460843	0.314681	0.410087
LGG (n=516)	Neutrophil_CIBERSORT	0.105725	0.0207816	0.0386387
LGG (n=516)	Neutrophil_CIBERSORT-ABS	0.145933	0.00137736	0.00320527
LGG (n=516)	Neutrophil_MCPCOUNTER	0.00705724	0.877695	0.910953
LGG (n=516)	Neutrophil_QUANTISEQ	NA	NA	NA
LGG (n=516)	Neutrophil_TIMER	0.331978	9.23152e-14	5.8946e-13
LGG (n=516)	Neutrophil_XCELL	-0.0497811	0.277391	0.367675
LGG (n=516)	Plasmacytoid dendritic cell_XCELL	0.202347	8.25081e-06	2.67289e-05
LGG (n=516)	T cell CD4+ (non-regulatory)_QUANTISEQ	0.0724891	0.113472	0.172154
LGG (n=516)	T cell CD4+ (non-regulatory)_XCELL	-0.0862309	0.0595842	0.0985166
LGG (n=516)	T cell CD4+ central memory_XCELL	-0.0067833	0.882407	0.914628
LGG (n=516)	T cell CD4+ effector memory_XCELL	0.00563192	0.902257	0.928156
LGG (n=516)	T cell CD4+ memory activated_CIBERSORT	0.0948989	0.0380751	0.0660782
LGG (n=516)	T cell CD4+ memory activated_CIBERSORT-ABS	0.0951626	0.0375407	0.0652694
LGG (n=516)	T cell CD4+ memory resting_CIBERSORT	0.172748	0.000147343	0.00039296
LGG (n=516)	T cell CD4+ memory resting_CIBERSORT-ABS	0.309198	4.76342e-12	2.7043e-11
LGG (n=516)	T cell CD4+ memory_XCELL	0.0792573	0.0834508	0.13233
LGG (n=516)	T cell CD4+ naive_CIBERSORT	-0.242036	8.42939e-08	3.39425e-07
LGG (n=516)	T cell CD4+ naive_CIBERSORT-ABS	-0.23403	2.27559e-07	8.81638e-07
LGG (n=516)	T cell CD4+ naive_XCELL	-0.0448024	0.328346	0.423918
LGG (n=516)	T cell CD4+ Th1_XCELL	0.0458772	0.316864	0.412743
LGG (n=516)	T cell CD4+ Th2_XCELL	0.240335	1.04406e-07	4.16898e-07
LGG (n=516)	T cell CD4+_EPIC	-0.0917437	0.0449854	0.0767421
LGG (n=516)	T cell CD4+_TIMER	0.225729	6.14068e-07	2.26581e-06
LGG (n=516)	T cell CD8+ central memory_XCELL	-0.103229	0.0240057	0.043893
LGG (n=516)	T cell CD8+ effector memory_XCELL	-0.0169807	0.711154	0.775534
LGG (n=516)	T cell CD8+ naive_XCELL	0.0282752	0.537439	0.626866
LGG (n=516)	T cell CD8+_CIBERSORT	0.18182	6.38409e-05	0.00018194
LGG (n=516)	T cell CD8+_CIBERSORT-ABS	0.251616	2.45137e-08	1.026e-07
LGG (n=516)	T cell CD8+_EPIC	-0.10941	0.0167119	0.0319634
LGG (n=516)	T cell CD8+_MCPCOUNTER	0.231723	3.00964e-07	1.1459e-06
LGG (n=516)	T cell CD8+_QUANTISEQ	0.180254	7.39788e-05	0.000209375
LGG (n=516)	T cell CD8+_TIMER	-0.192865	2.18082e-05	6.7014e-05
LGG (n=516)	T cell CD8+_XCELL	0.0260953	0.569268	0.656232
LIHC (n=371)	B cell memory_CIBERSORT	0.254313	1.70631e-06	6.01722e-06
LIHC (n=371)	B cell memory_CIBERSORT-ABS	0.277022	1.69981e-07	6.64851e-07
LIHC (n=371)	B cell memory_XCELL	0.220092	3.7256e-05	0.000109777
LIHC (n=371)	B cell naive_CIBERSORT	-0.118924	0.0271926	0.0489706
LIHC (n=371)	B cell naive_CIBERSORT-ABS	0.0919846	0.0880164	0.13865
LIHC (n=371)	B cell naive_XCELL	0.161644	0.00260096	0.00580307
LIHC (n=371)	B cell plasma_CIBERSORT	0.0527741	0.328391	0.423918
LIHC (n=371)	B cell plasma_CIBERSORT-ABS	0.155353	0.00381983	0.0082715
LIHC (n=371)	B cell plasma_XCELL	0.059725	0.268595	0.357503
LIHC (n=371)	B cell_EPIC	0.171201	0.00141307	0.00328039
LIHC (n=371)	B cell_MCPCOUNTER	0.712336	1.09527e-54	5.23359e-53
LIHC (n=371)	B cell_QUANTISEQ	0.492396	1.8052e-22	2.09534e-21
LIHC (n=371)	B cell_TIMER	0.460452	1.6556e-19	1.64242e-18
LIHC (n=371)	B cell_XCELL	0.367775	1.72468e-12	1.01533e-11
LIHC (n=371)	Class-switched memory B cell_XCELL	0.398719	1.35344e-14	9.21689e-14
LIHC (n=371)	Macrophage M0_CIBERSORT	0.191259	0.000353431	0.000886514
LIHC (n=371)	Macrophage M0_CIBERSORT-ABS	0.353911	1.28684e-11	7.0007e-11
LIHC (n=371)	Macrophage M1_CIBERSORT	0.127458	0.0178604	0.0339111
LIHC (n=371)	Macrophage M1_CIBERSORT-ABS	0.484957	9.42748e-22	1.06832e-20
LIHC (n=371)	Macrophage M1_QUANTISEQ	0.306629	6.04928e-09	2.63176e-08
LIHC (n=371)	Macrophage M1_XCELL	0.260128	9.6463e-07	3.48751e-06
LIHC (n=371)	Macrophage M2_CIBERSORT	-0.203214	0.000144372	0.000385395
LIHC (n=371)	Macrophage M2_CIBERSORT-ABS	0.425598	1.30454e-16	1.00541e-15
LIHC (n=371)	Macrophage M2_QUANTISEQ	0.222174	3.12884e-05	9.32473e-05
LIHC (n=371)	Macrophage M2_TIDE	-0.123187	0.0221072	0.0408648
LIHC (n=371)	Macrophage M2_XCELL	-0.277688	1.58355e-07	6.21922e-07
LIHC (n=371)	Macrophage_EPIC	-0.358547	6.64294e-12	3.70531e-11
LIHC (n=371)	Macrophage_TIMER	0.359107	6.12817e-12	3.43825e-11
LIHC (n=371)	Macrophage_XCELL	-0.00264108	0.961017	0.974614
LIHC (n=371)	Macrophage/Monocyte_MCPCOUNTER	0.378877	3.21248e-13	1.99354e-12
LIHC (n=371)	Myeloid dendritic cell activated_CIBERSORT	-0.131947	0.0141812	0.0276165
LIHC (n=371)	Myeloid dendritic cell activated_CIBERSORT-ABS	-0.131578	0.0144563	0.0280991
LIHC (n=371)	Myeloid dendritic cell activated_XCELL	0.511148	2.32839e-24	3.03432e-23
LIHC (n=371)	Myeloid dendritic cell resting_CIBERSORT	0.19984	0.000186865	0.000487926
LIHC (n=371)	Myeloid dendritic cell resting_CIBERSORT-ABS	0.265593	5.57324e-07	2.0644e-06
LIHC (n=371)	Myeloid dendritic cell_MCPCOUNTER	0.494774	1.05515e-22	1.2398e-21
LIHC (n=371)	Myeloid dendritic cell_QUANTISEQ	0.00708135	0.895732	0.925095
LIHC (n=371)	Myeloid dendritic cell_TIMER	0.583348	7.65785e-33	1.47349e-31
LIHC (n=371)	Myeloid dendritic cell_XCELL	0.377319	4.08304e-13	2.52831e-12
LIHC (n=371)	Neutrophil_CIBERSORT	-0.0328623	0.542962	0.630998
LIHC (n=371)	Neutrophil_CIBERSORT-ABS	0.0264843	0.623975	0.704028
LIHC (n=371)	Neutrophil_MCPCOUNTER	-0.0593946	0.271256	0.360711
LIHC (n=371)	Neutrophil_QUANTISEQ	-0.0213899	0.692177	0.762996
LIHC (n=371)	Neutrophil_TIMER	0.266584	5.03866e-07	1.8688e-06
LIHC (n=371)	Neutrophil_XCELL	-0.0451623	0.403023	0.501505
LIHC (n=371)	Plasmacytoid dendritic cell_XCELL	0.134439	0.0124411	0.0245483
LIHC (n=371)	T cell CD4+ (non-regulatory)_QUANTISEQ	0.180419	0.000760873	0.00183005
LIHC (n=371)	T cell CD4+ (non-regulatory)_XCELL	-0.0344554	0.523572	0.614191
LIHC (n=371)	T cell CD4+ central memory_XCELL	-0.0501902	0.352659	0.449566
LIHC (n=371)	T cell CD4+ effector memory_XCELL	0.110655	0.0399588	0.0690131
LIHC (n=371)	T cell CD4+ memory activated_CIBERSORT	0.0710378	0.188059	0.26445
LIHC (n=371)	T cell CD4+ memory activated_CIBERSORT-ABS	0.0737425	0.171752	0.245348
LIHC (n=371)	T cell CD4+ memory resting_CIBERSORT	0.0481416	0.372682	0.470281
LIHC (n=371)	T cell CD4+ memory resting_CIBERSORT-ABS	0.365172	2.53401e-12	1.47363e-11
LIHC (n=371)	T cell CD4+ memory_XCELL	0.163892	0.00225976	0.00507341
LIHC (n=371)	T cell CD4+ naive_CIBERSORT	-0.0853642	0.113489	0.172154
LIHC (n=371)	T cell CD4+ naive_CIBERSORT-ABS	-0.0852829	0.113834	0.172587
LIHC (n=371)	T cell CD4+ naive_XCELL	0.335217	1.6632e-10	8.32182e-10
LIHC (n=371)	T cell CD4+ Th1_XCELL	0.114325	0.0337753	0.05942
LIHC (n=371)	T cell CD4+ Th2_XCELL	0.282925	9.01032e-08	3.62309e-07
LIHC (n=371)	T cell CD4+_EPIC	0.159894	0.00289844	0.00640696
LIHC (n=371)	T cell CD4+_TIMER	0.398744	1.34785e-14	9.20066e-14
LIHC (n=371)	T cell CD8+ central memory_XCELL	0.270249	3.45852e-07	1.3064e-06
LIHC (n=371)	T cell CD8+ effector memory_XCELL	0.170827	0.00144809	0.00335082
LIHC (n=371)	T cell CD8+ naive_XCELL	-0.0365685	0.498411	0.590615
LIHC (n=371)	T cell CD8+_CIBERSORT	0.171469	0.00138843	0.0032258
LIHC (n=371)	T cell CD8+_CIBERSORT-ABS	0.457045	3.28851e-19	3.16381e-18
LIHC (n=371)	T cell CD8+_EPIC	-0.00142427	0.978971	0.984811
LIHC (n=371)	T cell CD8+_MCPCOUNTER	0.499039	3.98503e-23	4.88251e-22
LIHC (n=371)	T cell CD8+_QUANTISEQ	0.461959	1.21915e-19	1.21787e-18
LIHC (n=371)	T cell CD8+_TIMER	0.177932	0.00090186	0.0021529
LIHC (n=371)	T cell CD8+_XCELL	0.199911	0.000185853	0.000486111
LUAD (n=515)	B cell memory_CIBERSORT	0.512345	2.39983e-34	5.02213e-33
LUAD (n=515)	B cell memory_CIBERSORT-ABS	0.57141	4.49556e-44	1.43209e-42
LUAD (n=515)	B cell memory_XCELL	0.548177	5.13962e-40	1.36438e-38
LUAD (n=515)	B cell naive_CIBERSORT	0.101322	0.0244623	0.0445857
LUAD (n=515)	B cell naive_CIBERSORT-ABS	0.21034	2.46187e-06	8.46304e-06
LUAD (n=515)	B cell naive_XCELL	0.268262	1.42565e-09	6.66774e-09
LUAD (n=515)	B cell plasma_CIBERSORT	-0.0760698	0.0915686	0.143379
LUAD (n=515)	B cell plasma_CIBERSORT-ABS	0.168494	0.000170875	0.000451103
LUAD (n=515)	B cell plasma_XCELL	0.237877	9.03036e-08	3.62606e-07
LUAD (n=515)	B cell_EPIC	0.601482	7.86229e-50	2.96595e-48
LUAD (n=515)	B cell_MCPCOUNTER	0.652569	3.81732e-61	2.48733e-59
LUAD (n=515)	B cell_QUANTISEQ	0.678774	7.60195e-68	7.99903e-66
LUAD (n=515)	B cell_TIMER	0.4275	2.53361e-23	3.14453e-22
LUAD (n=515)	B cell_XCELL	0.645361	2.04084e-59	1.17022e-57
LUAD (n=515)	Class-switched memory B cell_XCELL	0.658776	1.13582e-62	8.80104e-61
LUAD (n=515)	Macrophage M0_CIBERSORT	-0.130657	0.00365883	0.00794686
LUAD (n=515)	Macrophage M0_CIBERSORT-ABS	0.0260853	0.563389	0.651042
LUAD (n=515)	Macrophage M1_CIBERSORT	0.225871	4.01902e-07	1.51016e-06
LUAD (n=515)	Macrophage M1_CIBERSORT-ABS	0.416061	4.64296e-22	5.34593e-21
LUAD (n=515)	Macrophage M1_QUANTISEQ	0.0988535	0.0281845	0.0505662
LUAD (n=515)	Macrophage M1_XCELL	0.210238	2.49032e-06	8.54036e-06
LUAD (n=515)	Macrophage M2_CIBERSORT	-0.167321	0.000189933	0.000495485
LUAD (n=515)	Macrophage M2_CIBERSORT-ABS	0.337066	1.45646e-14	9.84831e-14
LUAD (n=515)	Macrophage M2_QUANTISEQ	0.295658	2.10807e-11	1.12548e-10
LUAD (n=515)	Macrophage M2_TIDE	-0.140845	0.0017187	0.00392005
LUAD (n=515)	Macrophage M2_XCELL	0.195888	1.18198e-05	3.74862e-05
LUAD (n=515)	Macrophage_EPIC	0.25938	5.06948e-09	2.22917e-08
LUAD (n=515)	Macrophage_TIMER	-0.031717	0.482292	0.576378
LUAD (n=515)	Macrophage_XCELL	0.237614	9.33874e-08	3.74464e-07
LUAD (n=515)	Macrophage/Monocyte_MCPCOUNTER	0.197277	1.02145e-05	3.26476e-05
LUAD (n=515)	Myeloid dendritic cell activated_CIBERSORT	-0.126601	0.00487471	0.0103524
LUAD (n=515)	Myeloid dendritic cell activated_CIBERSORT-ABS	-0.0646481	0.151779	0.219995
LUAD (n=515)	Myeloid dendritic cell activated_XCELL	0.533835	1.15278e-37	2.75418e-36
LUAD (n=515)	Myeloid dendritic cell resting_CIBERSORT	0.115197	0.0104724	0.0209083
LUAD (n=515)	Myeloid dendritic cell resting_CIBERSORT-ABS	0.200637	7.14602e-06	2.32023e-05
LUAD (n=515)	Myeloid dendritic cell_MCPCOUNTER	0.36007	1.54484e-16	1.17482e-15
LUAD (n=515)	Myeloid dendritic cell_QUANTISEQ	-0.075733	0.0930176	0.145093
LUAD (n=515)	Myeloid dendritic cell_TIMER	0.264583	2.42483e-09	1.10349e-08
LUAD (n=515)	Myeloid dendritic cell_XCELL	0.379103	2.6894e-18	2.38715e-17
LUAD (n=515)	Neutrophil_CIBERSORT	-0.204161	4.88127e-06	1.61601e-05
LUAD (n=515)	Neutrophil_CIBERSORT-ABS	-0.121346	0.00698724	0.0143705
LUAD (n=515)	Neutrophil_MCPCOUNTER	0.0928444	0.0393317	0.0681766
LUAD (n=515)	Neutrophil_QUANTISEQ	-0.00856165	0.849607	0.887044
LUAD (n=515)	Neutrophil_TIMER	0.207201	3.49486e-06	1.18018e-05
LUAD (n=515)	Neutrophil_XCELL	-0.206581	3.7425e-06	1.26084e-05
LUAD (n=515)	Plasmacytoid dendritic cell_XCELL	0.341577	6.14962e-15	4.32131e-14
LUAD (n=515)	T cell CD4+ (non-regulatory)_QUANTISEQ	0.00637849	0.887659	0.91808
LUAD (n=515)	T cell CD4+ (non-regulatory)_XCELL	0.0432231	0.338204	0.434932
LUAD (n=515)	T cell CD4+ central memory_XCELL	0.11747	0.00903628	0.0182315
LUAD (n=515)	T cell CD4+ effector memory_XCELL	0.179186	6.31039e-05	0.000180198
LUAD (n=515)	T cell CD4+ memory activated_CIBERSORT	-0.0994149	0.0272975	0.0491287
LUAD (n=515)	T cell CD4+ memory activated_CIBERSORT-ABS	-0.0856843	0.05728	0.0950357
LUAD (n=515)	T cell CD4+ memory resting_CIBERSORT	0.318389	4.46349e-13	2.7461e-12
LUAD (n=515)	T cell CD4+ memory resting_CIBERSORT-ABS	0.568391	1.57926e-43	4.81676e-42
LUAD (n=515)	T cell CD4+ memory_XCELL	0.176696	8.00012e-05	0.000225087
LUAD (n=515)	T cell CD4+ naive_CIBERSORT	-0.0368498	0.414272	0.511726
LUAD (n=515)	T cell CD4+ naive_CIBERSORT-ABS	-0.0368498	0.414272	0.511726
LUAD (n=515)	T cell CD4+ naive_XCELL	0.385219	6.90546e-19	6.53112e-18
LUAD (n=515)	T cell CD4+ Th1_XCELL	-0.101903	0.0236505	0.0432989
LUAD (n=515)	T cell CD4+ Th2_XCELL	-0.100679	0.0253877	0.0460675
LUAD (n=515)	T cell CD4+_EPIC	0.356879	2.96862e-16	2.24566e-15
LUAD (n=515)	T cell CD4+_TIMER	0.468568	2.83293e-28	4.46265e-27
LUAD (n=515)	T cell CD8+ central memory_XCELL	0.486884	1.04214e-30	1.82183e-29
LUAD (n=515)	T cell CD8+ effector memory_XCELL	0.125002	0.00544649	0.0114313
LUAD (n=515)	T cell CD8+ naive_XCELL	-0.073723	0.102052	0.157387
LUAD (n=515)	T cell CD8+_CIBERSORT	0.164138	0.000252158	0.000644902
LUAD (n=515)	T cell CD8+_CIBERSORT-ABS	0.457226	7.71934e-27	1.12915e-25
LUAD (n=515)	T cell CD8+_EPIC	0.155497	0.000530374	0.00130187
LUAD (n=515)	T cell CD8+_MCPCOUNTER	0.38349	1.01704e-18	9.37577e-18
LUAD (n=515)	T cell CD8+_QUANTISEQ	0.400325	2.12234e-20	2.26198e-19
LUAD (n=515)	T cell CD8+_TIMER	0.165303	0.000227449	0.000583792
LUAD (n=515)	T cell CD8+_XCELL	0.414848	6.27855e-22	7.17155e-21
LUSC (n=501)	B cell memory_CIBERSORT	0.427446	1.31159e-22	1.53483e-21
LUSC (n=501)	B cell memory_CIBERSORT-ABS	0.458313	3.78952e-26	5.37849e-25
LUSC (n=501)	B cell memory_XCELL	0.665839	2.07116e-62	1.52257e-60
LUSC (n=501)	B cell naive_CIBERSORT	0.215509	2.03037e-06	7.05583e-06
LUSC (n=501)	B cell naive_CIBERSORT-ABS	0.309344	4.89374e-12	2.7728e-11
LUSC (n=501)	B cell naive_XCELL	0.509776	6.51452e-33	1.27055e-31
LUSC (n=501)	B cell plasma_CIBERSORT	-0.0767872	0.0939084	0.146324
LUSC (n=501)	B cell plasma_CIBERSORT-ABS	0.196879	1.48378e-05	4.66448e-05
LUSC (n=501)	B cell plasma_XCELL	0.408328	1.3625e-20	1.46303e-19
LUSC (n=501)	B cell_EPIC	0.628336	9.19997e-54	4.18672e-52
LUSC (n=501)	B cell_MCPCOUNTER	0.67892	9.90116e-66	8.87082e-64
LUSC (n=501)	B cell_QUANTISEQ	0.654739	1.00997e-59	6.03246e-58
LUSC (n=501)	B cell_TIMER	0.35081	2.92727e-15	2.08768e-14
LUSC (n=501)	B cell_XCELL	0.720288	1.79608e-77	3.67811e-75
LUSC (n=501)	Class-switched memory B cell_XCELL	0.633201	8.11245e-55	3.9421e-53
LUSC (n=501)	Macrophage M0_CIBERSORT	-0.13272	0.00368558	0.00799891
LUSC (n=501)	Macrophage M0_CIBERSORT-ABS	0.133922	0.00338481	0.00739089
LUSC (n=501)	Macrophage M1_CIBERSORT	0.257492	1.16038e-08	4.94323e-08
LUSC (n=501)	Macrophage M1_CIBERSORT-ABS	0.510323	5.43961e-33	1.06817e-31
LUSC (n=501)	Macrophage M1_QUANTISEQ	0.288388	1.37328e-10	6.95615e-10
LUSC (n=501)	Macrophage M1_XCELL	0.40195	6.00728e-20	6.1074e-19
LUSC (n=501)	Macrophage M2_CIBERSORT	-0.120327	0.0085221	0.017267
LUSC (n=501)	Macrophage M2_CIBERSORT-ABS	0.404555	3.28997e-20	3.44247e-19
LUSC (n=501)	Macrophage M2_QUANTISEQ	0.285789	2.03815e-10	1.00922e-09
LUSC (n=501)	Macrophage M2_TIDE	-0.250272	3.02304e-08	1.25792e-07
LUSC (n=501)	Macrophage M2_XCELL	0.295097	4.8625e-11	2.54394e-10
LUSC (n=501)	Macrophage_EPIC	0.455938	7.31077e-26	1.01747e-24
LUSC (n=501)	Macrophage_TIMER	0.0205874	0.65379	0.732194
LUSC (n=501)	Macrophage_XCELL	0.376612	1.6034e-17	1.34022e-16
LUSC (n=501)	Macrophage/Monocyte_MCPCOUNTER	0.375857	1.87969e-17	1.56205e-16
LUSC (n=501)	Myeloid dendritic cell activated_CIBERSORT	-0.185043	4.78366e-05	0.000138254
LUSC (n=501)	Myeloid dendritic cell activated_CIBERSORT-ABS	-0.0992784	0.030163	0.0536793
LUSC (n=501)	Myeloid dendritic cell activated_XCELL	0.618159	1.28952e-51	5.28151e-50
LUSC (n=501)	Myeloid dendritic cell resting_CIBERSORT	-0.0128302	0.779867	0.830565
LUSC (n=501)	Myeloid dendritic cell resting_CIBERSORT-ABS	0.0899652	0.0495652	0.0838423
LUSC (n=501)	Myeloid dendritic cell_MCPCOUNTER	0.539247	2.44751e-37	5.75165e-36
LUSC (n=501)	Myeloid dendritic cell_QUANTISEQ	0.0333116	0.467944	0.562836
LUSC (n=501)	Myeloid dendritic cell_TIMER	0.226169	5.99193e-07	2.21377e-06
LUSC (n=501)	Myeloid dendritic cell_XCELL	0.440014	5.25223e-24	6.75253e-23
LUSC (n=501)	Neutrophil_CIBERSORT	-0.204896	6.4462e-06	2.10253e-05
LUSC (n=501)	Neutrophil_CIBERSORT-ABS	-0.121171	0.00806736	0.016392
LUSC (n=501)	Neutrophil_MCPCOUNTER	0.030352	0.508413	0.598857
LUSC (n=501)	Neutrophil_QUANTISEQ	-0.0364355	0.427231	0.52502
LUSC (n=501)	Neutrophil_TIMER	0.278069	6.43195e-10	3.09923e-09
LUSC (n=501)	Neutrophil_XCELL	-0.0590339	0.198073	0.276608
LUSC (n=501)	Plasmacytoid dendritic cell_XCELL	0.47455	3.68844e-28	5.77855e-27
LUSC (n=501)	T cell CD4+ (non-regulatory)_QUANTISEQ	-0.149386	0.00106614	0.00252404
LUSC (n=501)	T cell CD4+ (non-regulatory)_XCELL	0.0164604	0.719909	0.781218
LUSC (n=501)	T cell CD4+ central memory_XCELL	-0.0334099	0.466631	0.561673
LUSC (n=501)	T cell CD4+ effector memory_XCELL	0.0534959	0.243559	0.328449
LUSC (n=501)	T cell CD4+ memory activated_CIBERSORT	0.053697	0.241788	0.326522
LUSC (n=501)	T cell CD4+ memory activated_CIBERSORT-ABS	0.0802495	0.079963	0.127647
LUSC (n=501)	T cell CD4+ memory resting_CIBERSORT	0.230902	3.41813e-07	1.29285e-06
LUSC (n=501)	T cell CD4+ memory resting_CIBERSORT-ABS	0.453334	1.4939e-25	2.06908e-24
LUSC (n=501)	T cell CD4+ memory_XCELL	0.178955	8.49617e-05	0.000237181
LUSC (n=501)	T cell CD4+ naive_CIBERSORT	-0.0570505	0.213593	0.294977
LUSC (n=501)	T cell CD4+ naive_CIBERSORT-ABS	-0.0568867	0.214913	0.296514
LUSC (n=501)	T cell CD4+ naive_XCELL	0.287831	1.49507e-10	7.54642e-10
LUSC (n=501)	T cell CD4+ Th1_XCELL	0.0165415	0.718587	0.781218
LUSC (n=501)	T cell CD4+ Th2_XCELL	0.078243	0.0878243	0.1385
LUSC (n=501)	T cell CD4+_EPIC	0.0384975	0.401524	0.500291
LUSC (n=501)	T cell CD4+_TIMER	0.360813	4.1108e-16	3.06918e-15
LUSC (n=501)	T cell CD8+ central memory_XCELL	0.509141	8.02549e-33	1.53394e-31
LUSC (n=501)	T cell CD8+ effector memory_XCELL	0.289359	1.18359e-10	6.01657e-10
LUSC (n=501)	T cell CD8+ naive_XCELL	0.0265685	0.562695	0.650502
LUSC (n=501)	T cell CD8+_CIBERSORT	0.270735	1.85496e-09	8.5364e-09
LUSC (n=501)	T cell CD8+_CIBERSORT-ABS	0.578894	5.02114e-44	1.58194e-42
LUSC (n=501)	T cell CD8+_EPIC	0.143752	0.00164545	0.00377098
LUSC (n=501)	T cell CD8+_MCPCOUNTER	0.508235	1.08041e-32	2.02454e-31
LUSC (n=501)	T cell CD8+_QUANTISEQ	0.498005	2.90992e-31	5.21421e-30
LUSC (n=501)	T cell CD8+_TIMER	0.183925	5.32314e-05	0.00015292
LUSC (n=501)	T cell CD8+_XCELL	0.433509	2.82455e-23	3.49051e-22
MESO (n=87)	B cell memory_CIBERSORT	0.44091	2.40743e-05	7.32484e-05
MESO (n=87)	B cell memory_CIBERSORT-ABS	0.492967	1.64308e-06	5.80136e-06
MESO (n=87)	B cell memory_XCELL	0.546532	6.27019e-08	2.54267e-07
MESO (n=87)	B cell naive_CIBERSORT	0.431303	3.77285e-05	0.000110941
MESO (n=87)	B cell naive_CIBERSORT-ABS	0.472358	5.01399e-06	1.65803e-05
MESO (n=87)	B cell naive_XCELL	0.265147	0.0141905	0.0276165
MESO (n=87)	B cell plasma_CIBERSORT	0.0161463	0.883395	0.915194
MESO (n=87)	B cell plasma_CIBERSORT-ABS	0.148419	0.175221	0.249806
MESO (n=87)	B cell plasma_XCELL	0.302863	0.00484127	0.010312
MESO (n=87)	B cell_EPIC	0.611278	5.17908e-10	2.50395e-09
MESO (n=87)	B cell_MCPCOUNTER	0.704445	5.37484e-14	3.51819e-13
MESO (n=87)	B cell_QUANTISEQ	0.420699	6.09924e-05	0.00017469
MESO (n=87)	B cell_TIMER	0.307626	0.00418362	0.00899134
MESO (n=87)	B cell_XCELL	0.483741	2.73192e-06	9.30216e-06
MESO (n=87)	Class-switched memory B cell_XCELL	0.493437	1.60043e-06	5.68756e-06
MESO (n=87)	Macrophage M0_CIBERSORT	-0.0253885	0.817593	0.859882
MESO (n=87)	Macrophage M0_CIBERSORT-ABS	0.00833117	0.939679	0.957717
MESO (n=87)	Macrophage M1_CIBERSORT	0.263334	0.014891	0.0288462
MESO (n=87)	Macrophage M1_CIBERSORT-ABS	0.425384	4.9427e-05	0.000142563
MESO (n=87)	Macrophage M1_QUANTISEQ	0.156526	0.152554	0.220673
MESO (n=87)	Macrophage M1_XCELL	0.150342	0.169635	0.242807
MESO (n=87)	Macrophage M2_CIBERSORT	-0.377728	0.00036537	0.000913265
MESO (n=87)	Macrophage M2_CIBERSORT-ABS	0.252047	0.0199622	0.0373819
MESO (n=87)	Macrophage M2_QUANTISEQ	0.173628	0.112024	0.170473
MESO (n=87)	Macrophage M2_TIDE	-0.256527	0.0177956	0.0338104
MESO (n=87)	Macrophage M2_XCELL	0.163263	0.135447	0.200169
MESO (n=87)	Macrophage_EPIC	0.097088	0.376726	0.47433
MESO (n=87)	Macrophage_TIMER	-0.00161212	0.988317	0.991432
MESO (n=87)	Macrophage_XCELL	0.16089	0.141299	0.207214
MESO (n=87)	Macrophage/Monocyte_MCPCOUNTER	0.154651	0.157591	0.226928
MESO (n=87)	Myeloid dendritic cell activated_CIBERSORT	0.0533801	0.627535	0.707766
MESO (n=87)	Myeloid dendritic cell activated_CIBERSORT-ABS	0.0573299	0.602256	0.684371
MESO (n=87)	Myeloid dendritic cell activated_XCELL	0.427755	4.43857e-05	0.000128669
MESO (n=87)	Myeloid dendritic cell resting_CIBERSORT	0.0411779	0.708271	0.773952
MESO (n=87)	Myeloid dendritic cell resting_CIBERSORT-ABS	0.0540471	0.623235	0.70347
MESO (n=87)	Myeloid dendritic cell_MCPCOUNTER	0.340584	0.00142537	0.00330359
MESO (n=87)	Myeloid dendritic cell_QUANTISEQ	-0.0986358	0.36913	0.466703
MESO (n=87)	Myeloid dendritic cell_TIMER	0.103518	0.345786	0.443356
MESO (n=87)	Myeloid dendritic cell_XCELL	0.504959	8.29594e-07	3.03761e-06
MESO (n=87)	Neutrophil_CIBERSORT	0.101162	0.356935	0.454209
MESO (n=87)	Neutrophil_CIBERSORT-ABS	0.132269	0.227541	0.310795
MESO (n=87)	Neutrophil_MCPCOUNTER	-0.0624262	0.570325	0.656675
MESO (n=87)	Neutrophil_QUANTISEQ	0.0407726	0.711015	0.775534
MESO (n=87)	Neutrophil_TIMER	0.322397	0.00262002	0.00583651
MESO (n=87)	Neutrophil_XCELL	-0.0672515	0.540842	0.629044
MESO (n=87)	Plasmacytoid dendritic cell_XCELL	0.241364	0.0260593	0.0471369
MESO (n=87)	T cell CD4+ (non-regulatory)_QUANTISEQ	-0.00661074	0.952119	0.967301
MESO (n=87)	T cell CD4+ (non-regulatory)_XCELL	-0.0548189	0.618275	0.699524
MESO (n=87)	T cell CD4+ central memory_XCELL	-0.14545	0.184112	0.259386
MESO (n=87)	T cell CD4+ effector memory_XCELL	0.0674462	0.539668	0.627933
MESO (n=87)	T cell CD4+ memory activated_CIBERSORT	0.0467287	0.671077	0.747176
MESO (n=87)	T cell CD4+ memory activated_CIBERSORT-ABS	0.0482551	0.660982	0.738805
MESO (n=87)	T cell CD4+ memory resting_CIBERSORT	-0.0624882	0.569941	0.656497
MESO (n=87)	T cell CD4+ memory resting_CIBERSORT-ABS	0.242746	0.0251905	0.0458256
MESO (n=87)	T cell CD4+ memory_XCELL	0.2167	0.0463673	0.0788933
MESO (n=87)	T cell CD4+ naive_CIBERSORT	NA	NA	NA
MESO (n=87)	T cell CD4+ naive_CIBERSORT-ABS	NA	NA	NA
MESO (n=87)	T cell CD4+ naive_XCELL	0.402051	0.000136676	0.000365872
MESO (n=87)	T cell CD4+ Th1_XCELL	-0.106307	0.332875	0.428537
MESO (n=87)	T cell CD4+ Th2_XCELL	-0.0796348	0.468773	0.56351
MESO (n=87)	T cell CD4+_EPIC	0.171182	0.117247	0.17692
MESO (n=87)	T cell CD4+_TIMER	0.115684	0.291743	0.384034
MESO (n=87)	T cell CD8+ central memory_XCELL	0.337133	0.0016044	0.0036828
MESO (n=87)	T cell CD8+ effector memory_XCELL	0.191708	0.0788105	0.126018
MESO (n=87)	T cell CD8+ naive_XCELL	0.0982997	0.370771	0.468076
MESO (n=87)	T cell CD8+_CIBERSORT	0.161879	0.138837	0.204392
MESO (n=87)	T cell CD8+_CIBERSORT-ABS	0.383839	0.000287423	0.000729241
MESO (n=87)	T cell CD8+_EPIC	0.0855723	0.436165	0.534167
MESO (n=87)	T cell CD8+_MCPCOUNTER	0.302191	0.00494114	0.010478
MESO (n=87)	T cell CD8+_QUANTISEQ	0.333157	0.00183574	0.00417705
MESO (n=87)	T cell CD8+_TIMER	0.175128	0.108911	0.165825
MESO (n=87)	T cell CD8+_XCELL	0.315918	0.00322619	0.00706067
OV (n=303)	B cell memory_CIBERSORT	0.208736	0.000920379	0.00218981
OV (n=303)	B cell memory_CIBERSORT-ABS	0.229739	0.000256185	0.000654619
OV (n=303)	B cell memory_XCELL	0.16612	0.00862889	0.0174587
OV (n=303)	B cell naive_CIBERSORT	-0.0726963	0.253093	0.339391
OV (n=303)	B cell naive_CIBERSORT-ABS	-0.0237047	0.709726	0.774861
OV (n=303)	B cell naive_XCELL	0.0469083	0.461195	0.558145
OV (n=303)	B cell plasma_CIBERSORT	-0.132371	0.0368468	0.0642579
OV (n=303)	B cell plasma_CIBERSORT-ABS	0.0340108	0.593247	0.675741
OV (n=303)	B cell plasma_XCELL	0.0739322	0.245093	0.330363
OV (n=303)	B cell_EPIC	0.280765	6.82968e-06	2.22255e-05
OV (n=303)	B cell_MCPCOUNTER	0.22585	0.000327578	0.000825277
OV (n=303)	B cell_QUANTISEQ	0.0761881	0.230948	0.314243
OV (n=303)	B cell_TIMER	-0.0530444	0.404618	0.503053
OV (n=303)	B cell_XCELL	0.247593	7.84915e-05	0.000221491
OV (n=303)	Class-switched memory B cell_XCELL	0.326762	1.32169e-07	5.2266e-07
OV (n=303)	Macrophage M0_CIBERSORT	0.127675	0.0441379	0.0755031
OV (n=303)	Macrophage M0_CIBERSORT-ABS	0.202364	0.0013252	0.0030914
OV (n=303)	Macrophage M1_CIBERSORT	0.183629	0.00363969	0.0079113
OV (n=303)	Macrophage M1_CIBERSORT-ABS	0.322059	2.0414e-07	7.95203e-07
OV (n=303)	Macrophage M1_QUANTISEQ	0.224715	0.000351679	0.000883132
OV (n=303)	Macrophage M1_XCELL	0.170728	0.00692681	0.0142564
OV (n=303)	Macrophage M2_CIBERSORT	-0.0852102	0.180158	0.2557
OV (n=303)	Macrophage M2_CIBERSORT-ABS	0.244657	9.59401e-05	0.000264481
OV (n=303)	Macrophage M2_QUANTISEQ	0.0157924	0.804164	0.848248
OV (n=303)	Macrophage M2_TIDE	-0.138423	0.0289759	0.0518564
OV (n=303)	Macrophage M2_XCELL	0.0168653	0.791156	0.837783
OV (n=303)	Macrophage_EPIC	0.232842	0.000209912	0.000542178
OV (n=303)	Macrophage_TIMER	0.025421	0.689758	0.762057
OV (n=303)	Macrophage_XCELL	0.137457	0.0301262	0.0536471
OV (n=303)	Macrophage/Monocyte_MCPCOUNTER	0.263718	2.49428e-05	7.54335e-05
OV (n=303)	Myeloid dendritic cell activated_CIBERSORT	-0.197836	0.00170596	0.0038941
OV (n=303)	Myeloid dendritic cell activated_CIBERSORT-ABS	-0.180919	0.00418108	0.00899134
OV (n=303)	Myeloid dendritic cell activated_XCELL	0.354475	8.75303e-09	3.76801e-08
OV (n=303)	Myeloid dendritic cell resting_CIBERSORT	0.178121	0.00481527	0.0102642
OV (n=303)	Myeloid dendritic cell resting_CIBERSORT-ABS	0.182308	0.00389522	0.00840934
OV (n=303)	Myeloid dendritic cell_MCPCOUNTER	0.435839	5.74831e-13	3.51395e-12
OV (n=303)	Myeloid dendritic cell_QUANTISEQ	-0.0349833	0.582718	0.667727
OV (n=303)	Myeloid dendritic cell_TIMER	0.127283	0.0447979	0.0765361
OV (n=303)	Myeloid dendritic cell_XCELL	0.394746	1.03346e-10	5.27212e-10
OV (n=303)	Neutrophil_CIBERSORT	-0.10231	0.107283	0.163606
OV (n=303)	Neutrophil_CIBERSORT-ABS	-0.0716529	0.259986	0.347173
OV (n=303)	Neutrophil_MCPCOUNTER	0.12422	0.0502427	0.0849327
OV (n=303)	Neutrophil_QUANTISEQ	0.0401396	0.528394	0.61934
OV (n=303)	Neutrophil_TIMER	0.175454	0.00549903	0.0115331
OV (n=303)	Neutrophil_XCELL	-0.0603857	0.34265	0.440133
OV (n=303)	Plasmacytoid dendritic cell_XCELL	0.231634	0.000226916	0.000582946
OV (n=303)	T cell CD4+ (non-regulatory)_QUANTISEQ	-0.201791	0.00136867	0.00319022
OV (n=303)	T cell CD4+ (non-regulatory)_XCELL	-0.0700812	0.270612	0.360021
OV (n=303)	T cell CD4+ central memory_XCELL	-0.0396371	0.533574	0.623626
OV (n=303)	T cell CD4+ effector memory_XCELL	0.113813	0.073016	0.117936
OV (n=303)	T cell CD4+ memory activated_CIBERSORT	0.135385	0.0327258	0.0577739
OV (n=303)	T cell CD4+ memory activated_CIBERSORT-ABS	0.135663	0.0323669	0.0572108
OV (n=303)	T cell CD4+ memory resting_CIBERSORT	-0.0744534	0.241773	0.326522
OV (n=303)	T cell CD4+ memory resting_CIBERSORT-ABS	0.167411	0.00811832	0.0164839
OV (n=303)	T cell CD4+ memory_XCELL	-0.0124127	0.845478	0.883376
OV (n=303)	T cell CD4+ naive_CIBERSORT	-0.0060994	0.923708	0.944125
OV (n=303)	T cell CD4+ naive_CIBERSORT-ABS	-0.0060994	0.923708	0.944125
OV (n=303)	T cell CD4+ naive_XCELL	0.189528	0.00267411	0.00594316
OV (n=303)	T cell CD4+ Th1_XCELL	0.143493	0.0235358	0.0431163
OV (n=303)	T cell CD4+ Th2_XCELL	0.116834	0.065675	0.107288
OV (n=303)	T cell CD4+_EPIC	-0.0069737	0.912813	0.935993
OV (n=303)	T cell CD4+_TIMER	0.264761	2.30998e-05	7.04544e-05
OV (n=303)	T cell CD8+ central memory_XCELL	0.248913	7.1665e-05	0.000203429
OV (n=303)	T cell CD8+ effector memory_XCELL	0.113982	0.0725874	0.117376
OV (n=303)	T cell CD8+ naive_XCELL	0.0522632	0.411583	0.509723
OV (n=303)	T cell CD8+_CIBERSORT	0.214472	0.000656778	0.00158768
OV (n=303)	T cell CD8+_CIBERSORT-ABS	0.350376	1.32998e-08	5.64896e-08
OV (n=303)	T cell CD8+_EPIC	0.0633888	0.319139	0.414954
OV (n=303)	T cell CD8+_MCPCOUNTER	0.411945	1.28166e-11	6.98577e-11
OV (n=303)	T cell CD8+_QUANTISEQ	0.3539	9.28547e-09	3.98525e-08
OV (n=303)	T cell CD8+_TIMER	0.0592649	0.3517	0.4488
OV (n=303)	T cell CD8+_XCELL	0.20881	0.000916392	0.00218214
PAAD (n=179)	B cell memory_CIBERSORT	0.242815	0.00137448	0.00320116
PAAD (n=179)	B cell memory_CIBERSORT-ABS	0.282579	0.000180602	0.000475034
PAAD (n=179)	B cell memory_XCELL	0.609221	9.45352e-19	8.74298e-18
PAAD (n=179)	B cell naive_CIBERSORT	0.2802	0.000205753	0.000531916
PAAD (n=179)	B cell naive_CIBERSORT-ABS	0.361102	1.22152e-06	4.38859e-06
PAAD (n=179)	B cell naive_XCELL	0.313186	3.03503e-05	9.06399e-05
PAAD (n=179)	B cell plasma_CIBERSORT	-0.112375	0.14337	0.209289
PAAD (n=179)	B cell plasma_CIBERSORT-ABS	0.130184	0.0896729	0.140872
PAAD (n=179)	B cell plasma_XCELL	0.193263	0.0113211	0.0224932
PAAD (n=179)	B cell_EPIC	0.611097	6.92522e-19	6.53112e-18
PAAD (n=179)	B cell_MCPCOUNTER	0.594197	1.06255e-17	9.01281e-17
PAAD (n=179)	B cell_QUANTISEQ	0.679438	1.69135e-24	2.2346e-23
PAAD (n=179)	B cell_TIMER	0.374324	4.56856e-07	1.7077e-06
PAAD (n=179)	B cell_XCELL	0.576661	1.53303e-16	1.16894e-15
PAAD (n=179)	Class-switched memory B cell_XCELL	0.58588	3.8441e-17	3.08712e-16
PAAD (n=179)	Macrophage M0_CIBERSORT	-0.195952	0.0102124	0.0204318
PAAD (n=179)	Macrophage M0_CIBERSORT-ABS	0.00428408	0.955652	0.96986
PAAD (n=179)	Macrophage M1_CIBERSORT	0.0789866	0.304461	0.398035
PAAD (n=179)	Macrophage M1_CIBERSORT-ABS	0.305476	4.84752e-05	0.000139958
PAAD (n=179)	Macrophage M1_QUANTISEQ	0.029519	0.701524	0.768834
PAAD (n=179)	Macrophage M1_XCELL	0.206411	0.00675672	0.0139464
PAAD (n=179)	Macrophage M2_CIBERSORT	-0.290591	0.000115427	0.000312198
PAAD (n=179)	Macrophage M2_CIBERSORT-ABS	0.383188	2.30478e-07	8.90538e-07
PAAD (n=179)	Macrophage M2_QUANTISEQ	0.435577	2.61436e-09	1.1841e-08
PAAD (n=179)	Macrophage M2_TIDE	-0.088204	0.251301	0.337462
PAAD (n=179)	Macrophage M2_XCELL	0.296008	8.46374e-05	0.000236506
PAAD (n=179)	Macrophage_EPIC	0.31004	3.67988e-05	0.000108653
PAAD (n=179)	Macrophage_TIMER	-0.0981758	0.20143	0.280613
PAAD (n=179)	Macrophage_XCELL	0.223162	0.00334726	0.00731448
PAAD (n=179)	Macrophage/Monocyte_MCPCOUNTER	0.354879	1.91161e-06	6.69999e-06
PAAD (n=179)	Myeloid dendritic cell activated_CIBERSORT	-0.0455493	0.554136	0.642682
PAAD (n=179)	Myeloid dendritic cell activated_CIBERSORT-ABS	-0.000605592	0.993728	0.994769
PAAD (n=179)	Myeloid dendritic cell activated_XCELL	0.508463	1.24956e-12	7.43252e-12
PAAD (n=179)	Myeloid dendritic cell resting_CIBERSORT	0.143184	0.0617235	0.101411
PAAD (n=179)	Myeloid dendritic cell resting_CIBERSORT-ABS	0.212419	0.00528281	0.0111203
PAAD (n=179)	Myeloid dendritic cell_MCPCOUNTER	0.525955	1.49983e-13	9.47141e-13
PAAD (n=179)	Myeloid dendritic cell_QUANTISEQ	0.0298346	0.698488	0.767378
PAAD (n=179)	Myeloid dendritic cell_TIMER	0.289312	0.00012409	0.000333738
PAAD (n=179)	Myeloid dendritic cell_XCELL	0.398199	6.90272e-08	2.79127e-07
PAAD (n=179)	Neutrophil_CIBERSORT	-0.0276554	0.719552	0.781218
PAAD (n=179)	Neutrophil_CIBERSORT-ABS	0.0233965	0.761321	0.816576
PAAD (n=179)	Neutrophil_MCPCOUNTER	0.141605	0.0646792	0.105842
PAAD (n=179)	Neutrophil_QUANTISEQ	0.221651	0.00357361	0.00777946
PAAD (n=179)	Neutrophil_TIMER	0.2995	6.90668e-05	0.000196248
PAAD (n=179)	Neutrophil_XCELL	0.0205923	0.789214	0.837098
PAAD (n=179)	Plasmacytoid dendritic cell_XCELL	0.281561	0.000190991	0.000497791
PAAD (n=179)	T cell CD4+ (non-regulatory)_QUANTISEQ	-0.0477794	0.534884	0.624903
PAAD (n=179)	T cell CD4+ (non-regulatory)_XCELL	0.135726	0.0767216	0.123227
PAAD (n=179)	T cell CD4+ central memory_XCELL	0.0162965	0.832454	0.871993
PAAD (n=179)	T cell CD4+ effector memory_XCELL	0.210165	0.00579811	0.0121072
PAAD (n=179)	T cell CD4+ memory activated_CIBERSORT	-0.0207955	0.787183	0.835584
PAAD (n=179)	T cell CD4+ memory activated_CIBERSORT-ABS	-0.0170157	0.825176	0.865952
PAAD (n=179)	T cell CD4+ memory resting_CIBERSORT	0.171444	0.0249546	0.0454252
PAAD (n=179)	T cell CD4+ memory resting_CIBERSORT-ABS	0.584475	4.7599e-17	3.76979e-16
PAAD (n=179)	T cell CD4+ memory_XCELL	0.0325037	0.672999	0.748699
PAAD (n=179)	T cell CD4+ naive_CIBERSORT	0.187915	0.0138455	0.0270403
PAAD (n=179)	T cell CD4+ naive_CIBERSORT-ABS	0.187915	0.0138455	0.0270403
PAAD (n=179)	T cell CD4+ naive_XCELL	0.402234	4.94102e-08	2.02081e-07
PAAD (n=179)	T cell CD4+ Th1_XCELL	-0.257138	0.000685967	0.00165405
PAAD (n=179)	T cell CD4+ Th2_XCELL	-0.0854023	0.266732	0.355354
PAAD (n=179)	T cell CD4+_EPIC	0.364898	9.25129e-07	3.3702e-06
PAAD (n=179)	T cell CD4+_TIMER	0.350539	2.59811e-06	8.87816e-06
PAAD (n=179)	T cell CD8+ central memory_XCELL	0.557924	2.23851e-15	1.60445e-14
PAAD (n=179)	T cell CD8+ effector memory_XCELL	0.0964204	0.209647	0.290226
PAAD (n=179)	T cell CD8+ naive_XCELL	0.130574	0.0887083	0.139587
PAAD (n=179)	T cell CD8+_CIBERSORT	0.306661	4.51464e-05	0.00013061
PAAD (n=179)	T cell CD8+_CIBERSORT-ABS	0.569715	4.22512e-16	3.14634e-15
PAAD (n=179)	T cell CD8+_EPIC	0.102519	0.182106	0.257351
PAAD (n=179)	T cell CD8+_MCPCOUNTER	0.484824	1.82243e-11	9.80281e-11
PAAD (n=179)	T cell CD8+_QUANTISEQ	0.456078	3.63961e-10	1.77764e-09
PAAD (n=179)	T cell CD8+_TIMER	0.374885	4.37757e-07	1.63845e-06
PAAD (n=179)	T cell CD8+_XCELL	0.53343	5.83671e-14	3.80315e-13
PCPG (n=181)	B cell memory_CIBERSORT	0.187234	0.0153974	0.0296868
PCPG (n=181)	B cell memory_CIBERSORT-ABS	0.194483	0.011786	0.0233521
PCPG (n=181)	B cell memory_XCELL	0.268691	0.000446478	0.0011054
PCPG (n=181)	B cell naive_CIBERSORT	-0.112054	0.14938	0.217067
PCPG (n=181)	B cell naive_CIBERSORT-ABS	0.0356998	0.646935	0.725697
PCPG (n=181)	B cell naive_XCELL	-0.0310353	0.690521	0.762065
PCPG (n=181)	B cell plasma_CIBERSORT	-0.114199	0.141698	0.207587
PCPG (n=181)	B cell plasma_CIBERSORT-ABS	0.229983	0.00279068	0.00619264
PCPG (n=181)	B cell plasma_XCELL	0.131363	0.0906117	0.142191
PCPG (n=181)	B cell_EPIC	0.195441	0.011369	0.0225727
PCPG (n=181)	B cell_MCPCOUNTER	0.50882	2.20674e-12	1.29381e-11
PCPG (n=181)	B cell_QUANTISEQ	0.182542	0.01822	0.0345024
PCPG (n=181)	B cell_TIMER	0.188817	0.0145353	0.0282335
PCPG (n=181)	B cell_XCELL	0.296912	9.76488e-05	0.000268675
PCPG (n=181)	Class-switched memory B cell_XCELL	0.237855	0.00196661	0.00445011
PCPG (n=181)	Macrophage M0_CIBERSORT	0.0661422	0.395739	0.494588
PCPG (n=181)	Macrophage M0_CIBERSORT-ABS	0.0674863	0.386187	0.484126
PCPG (n=181)	Macrophage M1_CIBERSORT	0.2505	0.00109432	0.00258863
PCPG (n=181)	Macrophage M1_CIBERSORT-ABS	0.365036	1.23274e-06	4.42336e-06
PCPG (n=181)	Macrophage M1_QUANTISEQ	0.325822	1.73309e-05	5.40084e-05
PCPG (n=181)	Macrophage M1_XCELL	0.276177	0.000303008	0.00076607
PCPG (n=181)	Macrophage M2_CIBERSORT	-0.140432	0.0702744	0.113957
PCPG (n=181)	Macrophage M2_CIBERSORT-ABS	0.423398	1.19211e-08	5.07087e-08
PCPG (n=181)	Macrophage M2_QUANTISEQ	0.222828	0.00379848	0.00823148
PCPG (n=181)	Macrophage M2_TIDE	-0.463913	2.71648e-10	1.33817e-09
PCPG (n=181)	Macrophage M2_XCELL	0.229945	0.00279533	0.00619816
PCPG (n=181)	Macrophage_EPIC	0.314694	3.44392e-05	0.000102318
PCPG (n=181)	Macrophage_TIMER	0.247675	0.00125072	0.00292959
PCPG (n=181)	Macrophage_XCELL	0.301839	7.3649e-05	0.000208648
PCPG (n=181)	Macrophage/Monocyte_MCPCOUNTER	0.335103	9.57186e-06	3.07307e-05
PCPG (n=181)	Myeloid dendritic cell activated_CIBERSORT	-0.0301245	0.699158	0.767378
PCPG (n=181)	Myeloid dendritic cell activated_CIBERSORT-ABS	0.0163145	0.834245	0.873232
PCPG (n=181)	Myeloid dendritic cell activated_XCELL	0.476715	7.39169e-11	3.8115e-10
PCPG (n=181)	Myeloid dendritic cell resting_CIBERSORT	0.0727152	0.350373	0.447647
PCPG (n=181)	Myeloid dendritic cell resting_CIBERSORT-ABS	0.0727847	0.349911	0.447256
PCPG (n=181)	Myeloid dendritic cell_MCPCOUNTER	0.316864	3.01864e-05	9.04331e-05
PCPG (n=181)	Myeloid dendritic cell_QUANTISEQ	-0.00992468	0.898707	0.926499
PCPG (n=181)	Myeloid dendritic cell_TIMER	0.204797	0.00793373	0.0161434
PCPG (n=181)	Myeloid dendritic cell_XCELL	0.477348	6.92095e-11	3.59463e-10
PCPG (n=181)	Neutrophil_CIBERSORT	0.028488	0.714772	0.778983
PCPG (n=181)	Neutrophil_CIBERSORT-ABS	0.0420439	0.589552	0.672869
PCPG (n=181)	Neutrophil_MCPCOUNTER	0.191075	0.0133789	0.0262361
PCPG (n=181)	Neutrophil_QUANTISEQ	0.0973111	0.210912	0.291554
PCPG (n=181)	Neutrophil_TIMER	0.319178	2.61999e-05	7.89853e-05
PCPG (n=181)	Neutrophil_XCELL	0.0567785	0.466113	0.56149
PCPG (n=181)	Plasmacytoid dendritic cell_XCELL	0.109216	0.160024	0.229969
PCPG (n=181)	T cell CD4+ (non-regulatory)_QUANTISEQ	0.0226813	0.771095	0.823363
PCPG (n=181)	T cell CD4+ (non-regulatory)_XCELL	0.0668151	0.390939	0.489442
PCPG (n=181)	T cell CD4+ central memory_XCELL	-0.110074	0.156749	0.225829
PCPG (n=181)	T cell CD4+ effector memory_XCELL	0.440444	2.57929e-09	1.17007e-08
PCPG (n=181)	T cell CD4+ memory activated_CIBERSORT	0.133203	0.0861468	0.136079
PCPG (n=181)	T cell CD4+ memory activated_CIBERSORT-ABS	0.136051	0.0795819	0.127109
PCPG (n=181)	T cell CD4+ memory resting_CIBERSORT	0.164961	0.0331413	0.0584355
PCPG (n=181)	T cell CD4+ memory resting_CIBERSORT-ABS	0.513906	1.22252e-12	7.28686e-12
PCPG (n=181)	T cell CD4+ memory_XCELL	0.127356	0.10098	0.155903
PCPG (n=181)	T cell CD4+ naive_CIBERSORT	-0.0262079	0.736724	0.796451
PCPG (n=181)	T cell CD4+ naive_CIBERSORT-ABS	-0.0262079	0.736724	0.796451
PCPG (n=181)	T cell CD4+ naive_XCELL	0.0281319	0.718185	0.781218
PCPG (n=181)	T cell CD4+ Th1_XCELL	-0.214823	0.00530517	0.0111592
PCPG (n=181)	T cell CD4+ Th2_XCELL	0.134913	0.0821551	0.130637
PCPG (n=181)	T cell CD4+_EPIC	0.0412322	0.596763	0.678667
PCPG (n=181)	T cell CD4+_TIMER	0.0216183	0.781547	0.832044
PCPG (n=181)	T cell CD8+ central memory_XCELL	0.155351	0.044996	0.0767421
PCPG (n=181)	T cell CD8+ effector memory_XCELL	-0.0643432	0.408742	0.506424
PCPG (n=181)	T cell CD8+ naive_XCELL	-0.0310308	0.690563	0.762065
PCPG (n=181)	T cell CD8+_CIBERSORT	0.216899	0.00487029	0.0103507
PCPG (n=181)	T cell CD8+_CIBERSORT-ABS	0.503274	4.1558e-12	2.37344e-11
PCPG (n=181)	T cell CD8+_EPIC	0.0457952	0.556755	0.644936
PCPG (n=181)	T cell CD8+_MCPCOUNTER	0.500148	5.90785e-12	3.32766e-11
PCPG (n=181)	T cell CD8+_QUANTISEQ	0.428678	7.48697e-09	3.23758e-08
PCPG (n=181)	T cell CD8+_TIMER	0.00879964	0.910138	0.933918
PCPG (n=181)	T cell CD8+_XCELL	0.126698	0.102768	0.158067
PRAD (n=498)	B cell memory_CIBERSORT	0.406394	5.64122e-18	4.88622e-17
PRAD (n=498)	B cell memory_CIBERSORT-ABS	0.418028	5.01955e-19	4.78108e-18
PRAD (n=498)	B cell memory_XCELL	0.341579	7.92426e-13	4.78292e-12
PRAD (n=498)	B cell naive_CIBERSORT	-0.17265	0.000404114	0.00100225
PRAD (n=498)	B cell naive_CIBERSORT-ABS	0.113372	0.0207314	0.0385703
PRAD (n=498)	B cell naive_XCELL	0.170927	0.000462542	0.0011432
PRAD (n=498)	B cell plasma_CIBERSORT	-0.227142	2.86631e-06	9.72509e-06
PRAD (n=498)	B cell plasma_CIBERSORT-ABS	0.0889213	0.0700204	0.113674
PRAD (n=498)	B cell plasma_XCELL	0.0583566	0.234961	0.319257
PRAD (n=498)	B cell_EPIC	0.429	4.69399e-20	4.80631e-19
PRAD (n=498)	B cell_MCPCOUNTER	0.267211	3.11911e-08	1.29601e-07
PRAD (n=498)	B cell_QUANTISEQ	0.281621	5.05337e-09	2.2255e-08
PRAD (n=498)	B cell_TIMER	0.0444196	0.366151	0.464288
PRAD (n=498)	B cell_XCELL	0.40095	1.69476e-17	1.41246e-16
PRAD (n=498)	Class-switched memory B cell_XCELL	0.359657	3.78321e-14	2.51075e-13
PRAD (n=498)	Macrophage M0_CIBERSORT	0.166505	0.000650424	0.00157364
PRAD (n=498)	Macrophage M0_CIBERSORT-ABS	0.271202	1.90424e-08	7.99333e-08
PRAD (n=498)	Macrophage M1_CIBERSORT	0.127622	0.00916529	0.0184788
PRAD (n=498)	Macrophage M1_CIBERSORT-ABS	0.403865	9.42866e-18	8.06924e-17
PRAD (n=498)	Macrophage M1_QUANTISEQ	0.334834	2.34649e-12	1.37014e-11
PRAD (n=498)	Macrophage M1_XCELL	0.21621	8.61459e-06	2.78444e-05
PRAD (n=498)	Macrophage M2_CIBERSORT	-0.223977	3.9644e-06	1.3278e-05
PRAD (n=498)	Macrophage M2_CIBERSORT-ABS	0.319211	2.62404e-11	1.38803e-10
PRAD (n=498)	Macrophage M2_QUANTISEQ	-0.0618941	0.207739	0.287724
PRAD (n=498)	Macrophage M2_TIDE	-0.431202	2.88701e-20	3.05426e-19
PRAD (n=498)	Macrophage M2_XCELL	-0.0188963	0.700767	0.768548
PRAD (n=498)	Macrophage_EPIC	0.375963	2.05119e-15	1.47758e-14
PRAD (n=498)	Macrophage_TIMER	0.0204169	0.677985	0.752238
PRAD (n=498)	Macrophage_XCELL	0.1354	0.00567364	0.0118819
PRAD (n=498)	Macrophage/Monocyte_MCPCOUNTER	0.126594	0.00974772	0.0195842
PRAD (n=498)	Myeloid dendritic cell activated_CIBERSORT	0.0757706	0.122833	0.183905
PRAD (n=498)	Myeloid dendritic cell activated_CIBERSORT-ABS	0.0984253	0.0448218	0.0765361
PRAD (n=498)	Myeloid dendritic cell activated_XCELL	0.570956	2.33482e-37	5.53218e-36
PRAD (n=498)	Myeloid dendritic cell resting_CIBERSORT	0.101782	0.0379764	0.065947
PRAD (n=498)	Myeloid dendritic cell resting_CIBERSORT-ABS	0.147099	0.00263324	0.00586141
PRAD (n=498)	Myeloid dendritic cell_MCPCOUNTER	0.573209	1.05205e-37	2.53464e-36
PRAD (n=498)	Myeloid dendritic cell_QUANTISEQ	0.066093	0.178479	0.253693
PRAD (n=498)	Myeloid dendritic cell_TIMER	0.440428	3.62222e-21	4.0566e-20
PRAD (n=498)	Myeloid dendritic cell_XCELL	0.46476	1.11037e-23	1.4024e-22
PRAD (n=498)	Neutrophil_CIBERSORT	0.00483584	0.921665	0.943046
PRAD (n=498)	Neutrophil_CIBERSORT-ABS	0.0082553	0.866684	0.901309
PRAD (n=498)	Neutrophil_MCPCOUNTER	-0.17536	0.000325903	0.000821779
PRAD (n=498)	Neutrophil_QUANTISEQ	0.0118923	0.808908	0.852312
PRAD (n=498)	Neutrophil_TIMER	0.477915	3.98331e-25	5.4124e-24
PRAD (n=498)	Neutrophil_XCELL	-0.0196598	0.689293	0.761863
PRAD (n=498)	Plasmacytoid dendritic cell_XCELL	0.120844	0.0136488	0.0267107
PRAD (n=498)	T cell CD4+ (non-regulatory)_QUANTISEQ	0.230541	2.01277e-06	7.0202e-06
PRAD (n=498)	T cell CD4+ (non-regulatory)_XCELL	-0.0372821	0.448221	0.545306
PRAD (n=498)	T cell CD4+ central memory_XCELL	0.0827688	0.0918011	0.143652
PRAD (n=498)	T cell CD4+ effector memory_XCELL	0.378537	1.27521e-15	9.20912e-15
PRAD (n=498)	T cell CD4+ memory activated_CIBERSORT	-0.0280549	0.56827	0.655626
PRAD (n=498)	T cell CD4+ memory activated_CIBERSORT-ABS	-0.0270709	0.581922	0.667081
PRAD (n=498)	T cell CD4+ memory resting_CIBERSORT	0.306869	1.60521e-10	8.07392e-10
PRAD (n=498)	T cell CD4+ memory resting_CIBERSORT-ABS	0.55664	3.21285e-35	6.92575e-34
[truncated: 882 more rows]
