# Supplementary material for: Comprehensive pan-cancer analysis reveals the prognostic value and immunological role of SPIB
Source: Aging (Albany NY). 2022 Aug 14;14(15):6338–57. doi: 10.18632/aging.204225 (PMC9417235; doi:10.18632/aging.204225)
Supplement: Supplementary Table 4 [file aging-14-204225-s005.xlsx]

## Sheet: ESTIMATE
Supplementary Table 4. ESTIMATE.
Immu	StromalScore	StromalScore	StromalScore	StromalScore	ImmuneScore	ImmuneScore	ImmuneScore	ImmuneScore	ESTIMATEScore	ESTIMATEScore	ESTIMATEScore	ESTIMATEScore
Method	pearson_R	pearson_P	spearman_P	spearman_R	pearson_R	pearson_P	spearman_P	spearman_R	pearson_R	pearson_P	spearman_P	spearman_R
TCGA-GBM(N=152)	0.304747	0.00013488	0.332103	2.91625e-05	0.331301	3.05673e-05	0.318679	6.29843e-05	0.332219	2.89655e-05	0.337168	2.16041e-05
TCGA-GBMLGG(N=656)	0.415981	7.74866e-29	0.458651	1.94623e-35	0.417645	4.45765e-29	0.450948	3.55728e-34	0.427773	1.43986e-30	0.462943	3.73272e-36
TCGA-LGG(N=504)	0.372396	5.03058e-18	0.366058	1.99366e-17	0.369564	9.34257e-18	0.369567	9.33664e-18	0.381244	6.98942e-19	0.375265	2.67054e-18
TCGA-UCEC(N=178)	0.299465	4.89034e-05	0.335277	4.76767e-06	0.416593	7.29435e-09	0.466091	5.50784e-11	0.40649	1.80161e-08	0.449392	3.1282e-10
TARGET-LAML(N=142)	0.218725	0.00891968	0.220961	0.00822909	0.474948	2.34439e-09	0.490844	5.59533e-10	0.390838	1.51765e-06	0.391712	1.43129e-06
TCGA-BRCA(N=1077)	0.233601	8.16327e-15	0.2641	1.20712e-18	0.695101	2.95012e-156	0.702019	1.14549e-160	0.553275	2.16186e-87	0.571016	3.25721e-94
TCGA-CESC(N=291)	0.313764	4.54942e-08	0.34189	2.1174e-09	0.53071	1.52331e-22	0.525478	4.65525e-22	0.493637	2.79479e-19	0.496411	1.64311e-19
TCGA-LUAD(N=500)	0.371597	8.1003e-18	0.348805	9.4599e-16	0.661672	2.83255e-64	0.64782	7.8594e-61	0.56966	2.34616e-44	0.541983	1.61563e-39
TCGA-ESCA(N=181)	0.148999	0.0452979	0.13517	0.0696373	0.408851	1.10255e-08	0.386671	7.5862e-08	0.304568	3.06437e-05	0.283363	0.000110919
TCGA-STES(N=569)	0.358165	1.15442e-18	0.382469	2.92111e-21	0.519061	1.43458e-40	0.505085	3.60952e-38	0.475452	1.97078e-33	0.479553	4.63787e-34
TCGA-SARC(N=258)	-0.0791018	0.205378	-0.0864405	0.16627	0.182945	0.00318608	0.142819	0.0217535	0.0866727	0.16513	0.0666859	0.285917
TCGA-KIRP(N=285)	0.476134	1.56271e-17	0.502429	1.23466e-19	0.528275	6.92469e-22	0.558789	8.35551e-25	0.536544	1.19859e-22	0.562241	3.73812e-25
TCGA-KIPAN(N=878)	0.510981	1.44851e-59	0.513455	3.20129e-60	0.620128	1.99931e-94	0.631978	4.47415e-99	0.600508	3.77223e-87	0.614355	3.12675e-92
TCGA-COAD(N=282)	0.357222	6.5273e-10	0.344799	2.7173e-09	0.535051	2.75255e-22	0.526935	1.49987e-21	0.466089	1.29476e-16	0.452121	1.29759e-15
TCGA-COADREAD(N=373)	0.328795	7.48161e-11	0.315789	4.4097e-10	0.514081	1.50664e-26	0.511465	2.97462e-26	0.439033	5.24509e-19	0.428021	4.76108e-18
TCGA-PRAD(N=495)	0.391	1.57276e-19	0.379908	1.92349e-18	0.672606	1.81107e-66	0.680508	1.38649e-68	0.595361	8.42967e-49	0.586075	5.45411e-47
TCGA-STAD(N=388)	0.33781	8.22521e-12	0.355862	5.01407e-13	0.479022	1.1902e-23	0.453053	4.91728e-21	0.447656	1.61428e-20	0.440719	7.21269e-20
TCGA-HNSC(N=517)	0.319087	1.06238e-13	0.373953	1.3244e-18	0.657908	2.01865e-65	0.68566	4.81351e-73	0.561299	2.9921e-44	0.611052	3.0626e-54
TCGA-KIRC(N=528)	0.407848	1.4022e-22	0.364823	4.5746e-18	0.567277	2.70568e-46	0.554865	5.8047e-44	0.560555	5.09476e-45	0.553947	8.55759e-44
TCGA-LUSC(N=491)	0.399785	2.87551e-20	0.419152	2.60025e-22	0.623712	2.785e-54	0.64772	9.69387e-60	0.550014	3.62132e-40	0.573147	3.23659e-44
TCGA-THYM(N=118)	0.253398	0.00562901	0.137253	0.138313	0.467691	9.30749e-08	0.546566	1.52778e-10	0.47757	4.54424e-08	0.41783	2.50569e-06
TCGA-LIHC(N=363)	0.331214	9.65218e-11	0.374691	1.52498e-13	0.486722	5.46941e-23	0.515731	4.65272e-26	0.457849	3.28559e-20	0.492266	1.49135e-23
TARGET-WT(N=80)	-0.118293	0.295992	-0.0346895	0.76	-0.0516579	0.649056	-0.0357798	0.752694	-0.0958231	0.397817	-0.0479253	0.672913
TCGA-SKCM-P(N=101)	0.422841	1.05752e-05	0.382902	7.75244e-05	0.602606	2.60686e-11	0.633826	1.12487e-12	0.584355	1.4056e-10	0.578975	2.26483e-10
TCGA-SKCM(N=452)	0.507101	6.60441e-31	0.522019	5.84552e-33	0.74758	5.33243e-82	0.757497	2.27851e-85	0.707777	6.41105e-70	0.715187	5.19845e-72
TCGA-BLCA(N=405)	0.506408	9.13135e-28	0.536552	1.42961e-31	0.593809	5.93639e-40	0.610946	8.41574e-43	0.587413	6.21546e-39	0.60222	2.49393e-41
TCGA-SKCM-M(N=351)	0.496817	2.80838e-23	0.512575	6.57048e-25	0.75755	1.26724e-66	0.768769	9.73073e-70	0.711077	2.44991e-55	0.718133	6.65077e-57
TCGA-THCA(N=503)	0.573421	2.6072e-45	0.596975	6.85641e-50	0.746048	1.59809e-90	0.750198	4.64443e-92	0.727315	6.0798e-84	0.737083	2.64957e-87
TARGET-NB(N=153)	0.10247	0.207521	0.137916	0.0891171	0.568138	1.86891e-14	0.564482	2.97971e-14	0.40352	2.31649e-07	0.40123	2.74917e-07
TCGA-MESO(N=85)	0.296711	0.00582583	0.320468	0.00278877	0.475612	4.22422e-06	0.467383	6.49378e-06	0.467318	6.5156e-06	0.458852	1.00247e-05
TCGA-READ(N=91)	0.239806	0.0220503	0.226506	0.0308501	0.424301	2.77189e-05	0.397546	9.53934e-05	0.339296	0.0010015	0.336306	0.00111689
TCGA-OV(N=417)	0.293187	1.03633e-09	0.330559	4.34211e-12	0.428134	5.1242e-20	0.477267	4.13264e-25	0.400207	1.79984e-17	0.444553	1.25512e-21
TCGA-UVM(N=79)	0.600591	4.88462e-09	0.572989	3.42276e-08	0.626372	6.65574e-10	0.601503	4.56577e-09	0.649623	9.36119e-11	0.619014	1.19756e-09
TCGA-PAAD(N=177)	0.318805	1.52699e-05	0.291791	8.12701e-05	0.617908	5.10668e-20	0.573741	6.98783e-17	0.496108	2.19174e-12	0.458655	1.36265e-10
TCGA-TGCT(N=132)	0.12436	0.155397	0.149021	0.0881252	0.489092	2.67317e-09	0.447524	7.44855e-08	0.442645	1.07006e-07	0.44808	7.14488e-08
TCGA-UCS(N=56)	0.199487	0.140478	0.229118	0.0894002	0.341047	0.0101049	0.200478	0.138475	0.312418	0.0190677	0.268421	0.0454735
TCGA-LAML(N=214)	-0.0680352	0.321887	-0.0417421	0.543637	0.226118	0.000863176	0.247455	0.000256414	0.106337	0.120935	0.139109	0.042056
TARGET-ALL(N=86)	-0.179375	0.0984238	-0.120875	0.267594	0.198936	0.0663197	0.18487	0.0883723	0.0820752	0.452493	0.0958455	0.380024
TCGA-PCPG(N=177)	0.353767	1.36298e-06	0.34148	3.29526e-06	0.506312	6.50376e-13	0.536784	1.34523e-14	0.453285	2.36705e-10	0.472905	3.00239e-11
TCGA-ACC(N=77)	0.43792	6.80499e-05	0.387977	0.000489523	0.556747	1.45593e-07	0.511203	2.02568e-06	0.528574	7.76386e-07	0.480357	9.81623e-06
TARGET-ALL-R(N=99)	-0.0899624	0.375863	-0.0523266	0.606984	0.221445	0.0276094	0.198706	0.0486438	0.12715	0.209786	0.126169	0.213352
TCGA-DLBC(N=46)	-0.192356	0.200293	-0.147209	0.328927	-0.072568	0.631748	-0.013506	0.929014	-0.154539	0.305142	-0.119087	0.430538
TCGA-KICH(N=65)	0.438545	0.000258175	0.503503	1.90909e-05	0.442166	0.000226291	0.450315	0.000167289	0.457857	0.00012562	0.478103	5.6286e-05
TCGA-CHOL(N=36)	0.394971	0.0171242	0.427955	0.00922194	0.463516	0.00441135	0.45743	0.00503246	0.462464	0.00451371	0.461806	0.00457882
