# Supplementary material for: Comprehensive pan-cancer analysis reveals the prognostic value and immunological role of SPIB
Source: Aging (Albany NY). 2022 Aug 14;14(15):6338–57. doi: 10.18632/aging.204225 (PMC9417235; doi:10.18632/aging.204225)
Supplement: Supplementary Table 6 [file aging-14-204225-s007.xlsx]

## Sheet: GO
Supplementary Table 6. Enrichment analysis.
ID	Description	GeneRatio	BgRatio	pvalue	p.adjust	qvalue	geneID	Count	ONT
GO:0002376	immune system process	44/63	3063/17910	2.75753e-20	4.13353e-17	3.11746e-17	TLR10/IL21R/CD79A/CD19/PAX5/RELB/BLK/POU2AF1/TNFRSF13C/HLA-DOB/FCRL3/MS4A1/CXCR5/CLECL1/CNR2/TNFRSF13B/CORO1A/GCSAM/CD79B/VPREB3/GPR18/CD83/BATF/CD22/NFKB2/CD48/MCOLN2/KLHL6/LTA/PLA2G2D/CSK/IKZF3/FCRL4/LPXN/IL16/RAC2/TIGIT/SASH3/CD27/IL2RG/POU2F2/NCF1/CD40/DTX1	44	BP
GO:0046649	lymphocyte activation	24/63	630/17910	3.62078e-19	2.71377e-16	2.04669e-16	IL21R/CD79A/CD19/RELB/TNFRSF13C/FCRL3/MS4A1/CXCR5/CLECL1/CORO1A/GPR18/CD83/BATF/CD22/PLA2G2D/CSK/IKZF3/RAC2/TIGIT/SASH3/CD27/POU2F2/CD40/DTX1	24	BP
GO:0006955	immune response	35/63	2148/17910	9.37019e-17	4.68197e-14	3.53108e-14	TLR10/CD79A/CD19/PAX5/RELB/BLK/POU2AF1/TNFRSF13C/HLA-DOB/FCRL3/MS4A1/CNR2/TNFRSF13B/CORO1A/GCSAM/CD79B/CD83/BATF/CD22/NFKB2/CD48/MCOLN2/KLHL6/LTA/CSK/FCRL4/LPXN/IL16/RAC2/SASH3/CD27/IL2RG/POU2F2/NCF1/CD40	35	BP
GO:0050853	B cell receptor signaling pathway	10/63	53/17910	2.37738e-15	8.90921e-13	6.71921e-13	CD79A/CD19/PAX5/BLK/FCRL3/MS4A1/GCSAM/CD22/KLHL6/LPXN	10	BP
GO:0002682	regulation of immune system process	29/63	1570/17910	6.84686e-15	2.05269e-12	1.54811e-12	TLR10/CD79A/CD19/PAX5/RELB/BLK/TNFRSF13C/HLA-DOB/FCRL3/MS4A1/CLECL1/CNR2/CORO1A/GCSAM/GPR18/CD83/CD22/CD48/KLHL6/LTA/CSK/IKZF3/LPXN/RAC2/TIGIT/SASH3/CD27/CD40/DTX1	29	BP
GO:0045321	leukocyte activation	25/63	1186/17910	5.5827e-14	1.39474e-11	1.0519e-11	IL21R/CD79A/CD19/RELB/TNFRSF13C/FCRL3/MS4A1/CXCR5/CLECL1/CNR2/CORO1A/GPR18/CD83/BATF/CD22/PLA2G2D/CSK/IKZF3/RAC2/TIGIT/SASH3/CD27/POU2F2/CD40/DTX1	25	BP
GO:0001775	cell activation	26/63	1342/17910	1.03819e-13	2.22322e-11	1.67672e-11	IL21R/CD79A/CD19/RELB/TNFRSF13C/FCRL3/MS4A1/CXCR5/CLECL1/CNR2/CORO1A/GPR18/CD83/BATF/CD22/NFKB2/PLA2G2D/CSK/IKZF3/RAC2/TIGIT/SASH3/CD27/POU2F2/CD40/DTX1	26	BP
GO:0002250	adaptive immune response	18/63	563/17910	4.77661e-13	8.95017e-11	6.7501e-11	CD79A/CD19/RELB/TNFRSF13C/TNFRSF13B/CD79B/BATF/NFKB2/CD48/MCOLN2/KLHL6/LTA/CSK/FCRL4/SASH3/CD27/POU2F2/CD40	18	BP
GO:0050855	regulation of B cell receptor signaling pathway	7/63	28/17910	5.27931e-12	7.99186e-10	6.02736e-10	CD19/PAX5/BLK/FCRL3/GCSAM/CD22/LPXN	7	BP
GO:0030098	lymphocyte differentiation	14/63	325/17910	5.33146e-12	7.99186e-10	6.02736e-10	CD79A/CD19/RELB/FCRL3/MS4A1/GPR18/CD83/BATF/PLA2G2D/IKZF3/SASH3/CD27/POU2F2/DTX1	14	BP
GO:0051249	regulation of lymphocyte activation	15/63	401/17910	6.3014e-12	8.27433e-10	6.24039e-10	CD19/TNFRSF13C/FCRL3/CLECL1/CORO1A/CD83/CD22/CSK/IKZF3/RAC2/TIGIT/SASH3/CD27/CD40/DTX1	15	BP
GO:0002684	positive regulation of immune system process	22/63	1087/17910	6.62388e-12	8.27433e-10	6.24039e-10	TLR10/CD79A/CD19/PAX5/RELB/BLK/TNFRSF13C/FCRL3/MS4A1/CLECL1/CORO1A/GCSAM/CD83/CD22/KLHL6/LTA/CSK/LPXN/RAC2/SASH3/CD27/CD40	22	BP
GO:0002694	regulation of leukocyte activation	16/63	492/17910	9.21849e-12	1.06296e-09	8.01672e-10	CD19/TNFRSF13C/FCRL3/CLECL1/CNR2/CORO1A/CD83/CD22/CSK/IKZF3/RAC2/TIGIT/SASH3/CD27/CD40/DTX1	16	BP
GO:0042113	B cell activation	12/63	215/17910	1.02605e-11	1.09861e-09	8.28558e-10	CD79A/CD19/TNFRSF13C/FCRL3/MS4A1/CXCR5/BATF/CD22/IKZF3/CD27/POU2F2/CD40	12	BP
GO:0050865	regulation of cell activation	16/63	535/17910	3.22349e-11	3.22134e-09	2.42949e-09	CD19/TNFRSF13C/FCRL3/CLECL1/CNR2/CORO1A/CD83/CD22/CSK/IKZF3/RAC2/TIGIT/SASH3/CD27/CD40/DTX1	16	BP
GO:0046651	lymphocyte proliferation	12/63	244/17910	4.50356e-11	4.21928e-09	3.18212e-09	CD79A/CD19/TNFRSF13C/FCRL3/MS4A1/CLECL1/CORO1A/CD22/IKZF3/RAC2/SASH3/CD40	12	BP
GO:0032943	mononuclear cell proliferation	12/63	246/17910	4.95198e-11	4.36648e-09	3.29314e-09	CD79A/CD19/TNFRSF13C/FCRL3/MS4A1/CLECL1/CORO1A/CD22/IKZF3/RAC2/SASH3/CD40	12	BP
GO:0042100	B cell proliferation	8/63	71/17910	1.32287e-10	1.10166e-08	8.30858e-09	CD79A/CD19/TNFRSF13C/FCRL3/MS4A1/CD22/IKZF3/CD40	8	BP
GO:0070661	leukocyte proliferation	12/63	270/17910	1.45515e-10	1.14804e-08	8.65833e-09	CD79A/CD19/TNFRSF13C/FCRL3/MS4A1/CLECL1/CORO1A/CD22/IKZF3/RAC2/SASH3/CD40	12	BP
GO:0050851	antigen receptor-mediated signaling pathway	11/63	224/17910	3.18843e-10	2.31101e-08	1.74293e-08	CD79A/CD19/PAX5/BLK/FCRL3/MS4A1/GCSAM/CD22/KLHL6/CSK/LPXN	11	BP
GO:0042110	T cell activation	14/63	443/17910	3.23757e-10	2.31101e-08	1.74293e-08	RELB/TNFRSF13C/CLECL1/CORO1A/GPR18/CD83/BATF/PLA2G2D/CSK/RAC2/TIGIT/SASH3/CD27/DTX1	14	BP
GO:0002521	leukocyte differentiation	14/63	485/17910	1.05028e-09	7.15623e-08	5.39714e-08	CD79A/CD19/RELB/FCRL3/MS4A1/GPR18/CD83/BATF/PLA2G2D/IKZF3/SASH3/CD27/POU2F2/DTX1	14	BP
GO:0050776	regulation of immune response	19/63	1033/17910	1.32799e-09	8.65503e-08	6.52751e-08	TLR10/CD79A/CD19/PAX5/RELB/BLK/TNFRSF13C/FCRL3/MS4A1/GCSAM/CD22/CD48/KLHL6/LTA/CSK/LPXN/RAC2/SASH3/CD40	19	BP
GO:0050778	positive regulation of immune response	17/63	809/17910	1.64657e-09	1.02842e-07	7.7562e-08	TLR10/CD79A/CD19/PAX5/RELB/BLK/TNFRSF13C/FCRL3/MS4A1/GCSAM/CD22/KLHL6/LTA/CSK/LPXN/SASH3/CD40	17	BP
GO:0002520	immune system development	18/63	938/17910	2.0685e-09	1.24027e-07	9.35397e-08	CD79A/CD19/RELB/FCRL3/MS4A1/CXCR5/GPR18/CD83/BATF/NFKB2/LTA/PLA2G2D/IKZF3/SASH3/CD27/POU2F2/CD40/DTX1	18	BP
GO:0050854	regulation of antigen receptor-mediated signaling pathway	7/63	63/17910	2.2412e-09	1.29214e-07	9.74512e-08	CD19/PAX5/BLK/FCRL3/GCSAM/CD22/LPXN	7	BP
GO:0002768	immune response-regulating cell surface receptor signaling pathway	13/63	434/17910	2.89276e-09	1.60602e-07	1.21124e-07	CD79A/CD19/PAX5/RELB/BLK/FCRL3/MS4A1/GCSAM/CD22/KLHL6/CSK/LPXN/CD40	13	BP
GO:0002460	adaptive immune response based on somatic recombination of immune receptors built from immunoglobulin superfamily domains	11/63	295/17910	5.78635e-09	3.09776e-07	2.33629e-07	CD19/RELB/TNFRSF13C/BATF/NFKB2/KLHL6/LTA/SASH3/CD27/POU2F2/CD40	11	BP
GO:0048534	hematopoietic or lymphoid organ development	17/63	890/17910	6.9029e-09	3.56808e-07	2.691e-07	CD79A/CD19/RELB/FCRL3/MS4A1/CXCR5/GPR18/CD83/BATF/NFKB2/LTA/PLA2G2D/IKZF3/SASH3/CD27/POU2F2/DTX1	17	BP
GO:0002429	immune response-activating cell surface receptor signaling pathway	12/63	399/17910	1.21379e-08	6.06488e-07	4.57406e-07	CD79A/CD19/PAX5/RELB/BLK/FCRL3/MS4A1/GCSAM/CD22/KLHL6/CSK/LPXN	12	BP
GO:0002764	immune response-regulating signaling pathway	14/63	603/17910	1.68903e-08	8.16727e-07	6.15965e-07	TLR10/CD79A/CD19/PAX5/RELB/BLK/FCRL3/MS4A1/GCSAM/CD22/KLHL6/CSK/LPXN/CD40	14	BP
GO:0050670	regulation of lymphocyte proliferation	9/63	199/17910	3.03621e-08	1.42228e-06	1.07266e-06	TNFRSF13C/FCRL3/CLECL1/CORO1A/CD22/IKZF3/RAC2/SASH3/CD40	9	BP
GO:0032944	regulation of mononuclear cell proliferation	9/63	200/17910	3.17061e-08	1.44023e-06	1.0862e-06	TNFRSF13C/FCRL3/CLECL1/CORO1A/CD22/IKZF3/RAC2/SASH3/CD40	9	BP
GO:0070663	regulation of leukocyte proliferation	9/63	214/17910	5.67878e-08	2.50367e-06	1.88824e-06	TNFRSF13C/FCRL3/CLECL1/CORO1A/CD22/IKZF3/RAC2/SASH3/CD40	9	BP
GO:0007166	cell surface receptor signaling pathway	28/63	2831/17910	6.78877e-08	2.85647e-06	2.15431e-06	IL21R/CD79A/CD19/PAX5/RELB/BLK/IL17REL/P2RX5/TNFRSF13C/CSF2RB/FCRL3/MS4A1/CXCR5/TNFRSF13B/CORO1A/GCSAM/BATF/CD22/KLHL6/LTA/CSK/LPXN/IL16/CD27/IL2RG/NCF1/CD40/DTX1	28	BP
GO:0002757	immune response-activating signal transduction	13/63	567/17910	6.86009e-08	2.85647e-06	2.15431e-06	TLR10/CD79A/CD19/PAX5/RELB/BLK/FCRL3/MS4A1/GCSAM/CD22/KLHL6/CSK/LPXN	13	BP
GO:0050863	regulation of T cell activation	10/63	307/17910	1.08307e-07	4.38788e-06	3.30928e-06	TNFRSF13C/CLECL1/CORO1A/CD83/CSK/RAC2/TIGIT/SASH3/CD27/DTX1	10	BP
GO:0009986	cell surface	14/62	667/18675	2.85613e-08	4.45556e-06	3.90839e-06	CD79A/CD19/CLEC17A/TNFRSF13C/FCRL3/MS4A1/FCRL2/FCRL5/CD83/CD22/FCRL4/TIGIT/IL2RG/CD40	14	CC
GO:0050864	regulation of B cell activation	7/63	110/17910	1.13319e-07	4.47013e-06	3.37131e-06	CD19/TNFRSF13C/FCRL3/CD22/IKZF3/CD27/CD40	7	BP
GO:0030183	B cell differentiation	7/63	113/17910	1.36402e-07	5.24273e-06	3.954e-06	CD79A/CD19/FCRL3/MS4A1/IKZF3/CD27/POU2F2	7	BP
GO:0007159	leukocyte cell-cell adhesion	10/63	328/17910	2.00162e-07	7.50107e-06	5.65721e-06	TNFRSF13C/CLECL1/CORO1A/CD83/CSK/RAC2/TIGIT/SASH3/CD27/DTX1	10	BP
GO:0051251	positive regulation of lymphocyte activation	9/63	258/17910	2.79045e-07	1.02021e-05	7.69432e-06	TNFRSF13C/FCRL3/CLECL1/CORO1A/CD83/CSK/SASH3/CD27/CD40	9	BP
GO:0002253	activation of immune response	13/63	647/17910	3.13848e-07	1.11164e-05	8.38387e-06	TLR10/CD79A/CD19/PAX5/RELB/BLK/FCRL3/MS4A1/GCSAM/CD22/KLHL6/CSK/LPXN	13	BP
GO:0001816	cytokine production	14/63	765/17910	3.18884e-07	1.11164e-05	8.38387e-06	TLR10/RELB/TNFRSF13C/CLECL1/GPR18/CD83/BATF/NFKB2/MCOLN2/LTA/CSK/TIGIT/SASH3/CD40	14	BP
GO:0048584	positive regulation of response to stimulus	24/63	2322/17910	4.32407e-07	1.47313e-05	1.11102e-05	TLR10/CD79A/CD19/PAX5/RELB/BLK/P2RX5/TNFRSF13C/FCRL3/MS4A1/FCRL2/GCSAM/CD22/MAP4K1/KLHL6/LTA/CSK/LPXN/IL16/RAC2/SASH3/CD27/NCF1/CD40	24	BP
GO:1903037	regulation of leukocyte cell-cell adhesion	9/63	295/17910	8.57671e-07	2.857e-05	2.15471e-05	TNFRSF13C/CLECL1/CORO1A/CD83/CSK/TIGIT/SASH3/CD27/DTX1	9	BP
GO:0030097	hemopoiesis	14/63	847/17910	1.08088e-06	3.52225e-05	2.65643e-05	CD79A/CD19/RELB/FCRL3/MS4A1/GPR18/CD83/BATF/PLA2G2D/IKZF3/SASH3/CD27/POU2F2/DTX1	14	BP
GO:0002696	positive regulation of leukocyte activation	9/63	305/17910	1.13113e-06	3.60759e-05	2.7208e-05	TNFRSF13C/FCRL3/CLECL1/CORO1A/CD83/CSK/SASH3/CD27/CD40	9	BP
GO:0046632	alpha-beta T cell differentiation	6/63	99/17910	1.2894e-06	4.02669e-05	3.03688e-05	RELB/GPR18/CD83/BATF/PLA2G2D/SASH3	6	BP
GO:0030217	T cell differentiation	8/63	234/17910	1.57144e-06	4.80734e-05	3.62563e-05	RELB/GPR18/CD83/BATF/PLA2G2D/SASH3/CD27/DTX1	8	BP
GO:0050867	positive regulation of cell activation	9/63	319/17910	1.63903e-06	4.89754e-05	3.69366e-05	TNFRSF13C/FCRL3/CLECL1/CORO1A/CD83/CSK/SASH3/CD27/CD40	9	BP
GO:0030888	regulation of B cell proliferation	5/63	57/17910	1.66628e-06	4.89754e-05	3.69366e-05	TNFRSF13C/FCRL3/CD22/IKZF3/CD40	5	BP
GO:0034097	response to cytokine	16/63	1167/17910	1.89154e-06	5.45274e-05	4.11239e-05	IL21R/IL17REL/TNFRSF13C/CSF2RB/CXCR5/TNFRSF13B/CORO1A/BATF/NFKB2/LTA/TCL1A/IL16/CD27/IL2RG/CD40/DTX1	16	BP
GO:0050859	negative regulation of B cell receptor signaling pathway	3/63	8/17910	2.2939e-06	6.48783e-05	4.89304e-05	FCRL3/CD22/LPXN	3	BP
GO:0071345	cellular response to cytokine stimulus	15/63	1084/17910	3.80773e-06	0.0001057	7.97173e-05	IL21R/IL17REL/TNFRSF13C/CSF2RB/CXCR5/TNFRSF13B/CORO1A/BATF/LTA/TCL1A/IL16/CD27/IL2RG/CD40/DTX1	15	BP
GO:0001817	regulation of cytokine production	12/63	698/17910	4.804e-06	0.000130931	9.87463e-05	TLR10/RELB/TNFRSF13C/GPR18/CD83/NFKB2/MCOLN2/LTA/CSK/TIGIT/SASH3/CD40	12	BP
GO:0050900	leukocyte migration	10/63	467/17910	4.89166e-06	0.000130939	9.87527e-05	CXCR5/CNR2/CORO1A/GCSAM/VPREB3/GPR18/CD48/MCOLN2/IL16/RAC2	10	BP
GO:0050671	positive regulation of lymphocyte proliferation	6/63	125/17910	5.02775e-06	0.000132221	9.97193e-05	TNFRSF13C/FCRL3/CLECL1/CORO1A/SASH3/CD40	6	BP
GO:0032946	positive regulation of mononuclear cell proliferation	6/63	126/17910	5.26474e-06	0.000136066	0.00010262	TNFRSF13C/FCRL3/CLECL1/CORO1A/SASH3/CD40	6	BP
GO:0044459	plasma membrane part	22/62	2283/18675	1.93096e-06	0.000150615	0.000132118	CD79A/CD19/CD72/P2RX5/TNFRSF13C/CSF2RB/HLA-DOB/MS4A1/CXCR5/CD37/CNR2/TNFRSF13B/CORO1A/CD79B/ARHGAP25/CD83/CD22/CD48/CD27/IL2RG/NCF1/CD40	22	CC
GO:0050870	positive regulation of T cell activation	7/63	198/17910	5.94872e-06	0.000151138	0.000113986	TNFRSF13C/CLECL1/CORO1A/CD83/CSK/SASH3/CD27	7	BP
GO:0043367	CD4-positive, alpha-beta T cell differentiation	5/63	74/17910	6.12316e-06	0.000152977	0.000115373	RELB/CD83/BATF/PLA2G2D/SASH3	5	BP
GO:0046631	alpha-beta T cell activation	6/63	133/17910	7.19065e-06	0.000176701	0.000133266	RELB/GPR18/CD83/BATF/PLA2G2D/SASH3	6	BP
GO:0070665	positive regulation of leukocyte proliferation	6/63	134/17910	7.5072e-06	0.000181505	0.000136889	TNFRSF13C/FCRL3/CLECL1/CORO1A/SASH3/CD40	6	BP
GO:0022407	regulation of cell-cell adhesion	9/63	389/17910	8.23654e-06	0.000193863	0.000146209	TNFRSF13C/CLECL1/CORO1A/CD83/CSK/TIGIT/SASH3/CD27/DTX1	9	BP
GO:0002449	lymphocyte mediated immunity	8/63	293/17910	8.27699e-06	0.000193863	0.000146209	CD19/CORO1A/BATF/LTA/SASH3/CD27/POU2F2/CD40	8	BP
GO:0009897	external side of plasma membrane	7/62	199/18675	4.20478e-06	0.000218648	0.000191797	CD79A/CD19/TNFRSF13C/MS4A1/CD83/IL2RG/CD40	7	CC
GO:1903039	positive regulation of leukocyte cell-cell adhesion	7/63	214/17910	9.88838e-06	0.000228041	0.000171986	TNFRSF13C/CLECL1/CORO1A/CD83/CSK/SASH3/CD27	7	BP
GO:0048583	regulation of response to stimulus	31/63	4275/17910	1.06346e-05	0.000241534	0.000182162	TLR10/CD79A/CD19/PAX5/RELB/BLK/P2RX5/TNFRSF13C/FCRL3/MS4A1/CNR2/FCRL2/GCSAM/RGS13/ARHGAP25/GPR18/CD22/CD48/MAP4K1/KLHL6/LTA/CSK/LPXN/IL16/RAC2/SASH3/CD27/ELL3/NCF1/CD40/DTX1	31	BP
GO:0019221	cytokine-mediated signaling pathway	12/63	764/17910	1.19866e-05	0.000268178	0.000202256	IL21R/IL17REL/TNFRSF13C/CSF2RB/CXCR5/TNFRSF13B/BATF/LTA/IL16/CD27/IL2RG/CD40	12	BP
GO:0031226	intrinsic component of plasma membrane	15/62	1231/18675	8.69687e-06	0.000339178	0.000297524	CD19/CD72/P2RX5/CSF2RB/MS4A1/CXCR5/CNR2/TNFRSF13B/CD79B/CD83/CD48/CD27/IL2RG/NCF1/CD40	15	CC
GO:0035710	CD4-positive, alpha-beta T cell activation	5/63	90/17910	1.60003e-05	0.000352712	0.000266011	RELB/CD83/BATF/PLA2G2D/SASH3	5	BP
GO:0030155	regulation of cell adhesion	11/63	659/17910	1.65947e-05	0.000360514	0.000271895	TNFRSF13C/CLECL1/CORO1A/CD83/CSK/LPXN/RAC2/TIGIT/SASH3/CD27/DTX1	11	BP
GO:0002467	germinal center formation	3/63	15/17910	1.83128e-05	0.000392156	0.000295759	TNFRSF13C/NFKB2/KLHL6	3	BP
GO:0016175	superoxide-generating NADPH oxidase activity	3/59	8/16967	2.20914e-06	0.000444037	0.00036974	NCF1C/NCF1B/NCF1	3	MF
GO:0045619	regulation of lymphocyte differentiation	6/63	164/17910	2.37403e-05	0.000501222	0.000378015	FCRL3/CD83/IKZF3/SASH3/CD27/DTX1	6	BP
GO:0002377	immunoglobulin production	5/63	98/17910	2.41964e-05	0.000503755	0.000379926	FCRL3/BATF/CD22/POU2F2/CD40	5	BP
GO:0002683	negative regulation of immune system process	9/63	451/17910	2.66429e-05	0.000547091	0.000412609	HLA-DOB/FCRL3/CNR2/GCSAM/GPR18/CD22/LPXN/TIGIT/DTX1	9	BP
GO:0022409	positive regulation of cell-cell adhesion	7/63	251/17910	2.76872e-05	0.000560853	0.000422988	TNFRSF13C/CLECL1/CORO1A/CD83/CSK/SASH3/CD27	7	BP
GO:0016064	immunoglobulin mediated immune response	6/63	171/17910	3.00449e-05	0.000600497	0.000452887	CD19/BATF/LTA/CD27/POU2F2/CD40	6	BP
GO:0005887	integral component of plasma membrane	14/62	1158/18675	2.01821e-05	0.000613494	0.000538152	CD19/CD72/P2RX5/CSF2RB/MS4A1/CXCR5/CNR2/TNFRSF13B/CD79B/CD83/CD27/IL2RG/NCF1/CD40	14	CC
GO:0098552	side of membrane	8/62	359/18675	2.35959e-05	0.000613494	0.000538152	CD79A/CD19/TNFRSF13C/MS4A1/CNR2/CD83/IL2RG/CD40	8	CC
GO:0019724	B cell mediated immunity	6/63	173/17910	3.20739e-05	0.000632616	0.00047711	CD19/BATF/LTA/CD27/POU2F2/CD40	6	BP
GO:0038023	signaling receptor activity	16/59	1344/16967	9.17677e-06	0.000866234	0.000721295	TLR10/IL21R/CD79A/CD72/P2RX5/CSF2RB/HLA-DOB/CXCR5/CNR2/TNFRSF13B/CD79B/GPR18/CD48/CD27/IL2RG/CD40	16	MF
GO:0060089	molecular transducer activity	16/59	1381/16967	1.29289e-05	0.000866234	0.000721295	TLR10/IL21R/CD79A/CD72/P2RX5/CSF2RB/HLA-DOB/CXCR5/CNR2/TNFRSF13B/CD79B/GPR18/CD48/CD27/IL2RG/CD40	16	MF
GO:0006959	humoral immune response	7/63	276/17910	5.06405e-05	0.000981367	0.000740134	CD19/PAX5/POU2AF1/MS4A1/CD83/LTA/POU2F2	7	BP
GO:0030595	leukocyte chemotaxis	6/63	188/17910	5.10651e-05	0.000981367	0.000740134	CXCR5/CNR2/CORO1A/GPR18/IL16/RAC2	6	BP
GO:0002440	production of molecular mediator of immune response	6/63	191/17910	5.57674e-05	0.00105817	0.000798057	FCRL3/BATF/CD22/SASH3/POU2F2/CD40	6	BP
GO:0050664	oxidoreductase activity, acting on NAD(P)H, oxygen as acceptor	3/59	16/16967	2.1658e-05	0.00108832	0.000906218	NCF1C/NCF1B/NCF1	3	MF
GO:0048305	immunoglobulin secretion	3/63	22/17910	6.09017e-05	0.00114115	0.000860638	CD22/POU2F2/CD40	3	BP
GO:0031224	intrinsic component of membrane	31/62	4976/18675	7.23466e-05	0.0016123	0.00141429	IL21R/CD79A/CD19/CLEC17A/CD72/P2RX5/TNFRSF13C/CSF2RB/HLA-DOB/FCRL3/MS4A1/CXCR5/CLECL1/CNR2/TNFRSF13B/FCRL2/FCRL5/PTPRCAP/CD79B/GPR18/CD83/CD22/CD48/WDFY4/MCOLN2/FCRL4/TIGIT/CD27/IL2RG/NCF1/CD40	31	CC
GO:0050871	positive regulation of B cell activation	4/63	70/17910	0.000107103	0.00198206	0.00149485	TNFRSF13C/FCRL3/CD27/CD40	4	BP
GO:0050858	negative regulation of antigen receptor-mediated signaling pathway	3/63	27/17910	0.000114231	0.00208821	0.0015749	FCRL3/CD22/LPXN	3	BP
GO:0016021	integral component of membrane	30/62	4821/18675	0.000108293	0.00211172	0.00185239	IL21R/CD79A/CD19/CLEC17A/CD72/P2RX5/TNFRSF13C/CSF2RB/HLA-DOB/FCRL3/MS4A1/CXCR5/CLECL1/CNR2/TNFRSF13B/FCRL2/FCRL5/PTPRCAP/CD79B/GPR18/CD83/CD22/WDFY4/MCOLN2/FCRL4/TIGIT/CD27/IL2RG/NCF1/CD40	30	CC
GO:0045577	regulation of B cell differentiation	3/63	28/17910	0.000127619	0.00230482	0.00173827	FCRL3/IKZF3/CD27	3	BP
GO:0060402	calcium ion transport into cytosol	5/63	145/17910	0.000156401	0.00279101	0.00210495	CD19/P2RX5/MS4A1/CORO1A/MCOLN2	5	BP
GO:0001819	positive regulation of cytokine production	8/63	446/17910	0.000162012	0.00285712	0.0021548	TNFRSF13C/CD83/NFKB2/MCOLN2/LTA/TIGIT/SASH3/CD40	8	BP
GO:0006952	defense response	16/63	1681/17910	0.000173686	0.00302739	0.00228322	TLR10/SP140/CD19/RELB/FCRL3/CNR2/CORO1A/PTPRCAP/CD83/BATF/CD48/MCOLN2/LTA/PLA2G2D/NCF1/CD40	16	BP
GO:0042129	regulation of T cell proliferation	5/63	149/17910	0.000177615	0.00306028	0.00230802	TNFRSF13C/CLECL1/CORO1A/RAC2/SASH3	5	BP
GO:0002819	regulation of adaptive immune response	5/63	150/17910	0.000183246	0.00312142	0.00235414	TNFRSF13C/CD48/LTA/SASH3/CD40	5	BP
GO:0032633	interleukin-4 production	3/63	32/17910	0.000191291	0.00318606	0.00240289	CLECL1/CD83/SASH3	3	BP
GO:0032733	positive regulation of interleukin-10 production	3/63	32/17910	0.000191291	0.00318606	0.00240289	CD83/TIGIT/SASH3	3	BP
GO:0009617	response to bacterium	9/63	588/17910	0.000202869	0.00334177	0.00252032	CSF2RB/MS4A1/CNR2/CD79B/NFKB2/KLHL6/LTA/IKZF3/CD40	9	BP
GO:0060401	cytosolic calcium ion transport	5/63	157/17910	0.000226577	0.00369173	0.00278425	CD19/P2RX5/MS4A1/CORO1A/MCOLN2	5	BP
GO:0002285	lymphocyte activation involved in immune response	5/63	158/17910	0.000233353	0.00376125	0.00283669	CD19/RELB/CORO1A/BATF/CD40	5	BP
GO:0060326	cell chemotaxis	6/63	253/17910	0.000259434	0.00413714	0.00312018	CXCR5/CNR2/CORO1A/GPR18/IL16/RAC2	6	BP
GO:0002824	positive regulation of adaptive immune response based on somatic recombination of immune receptors built from immunoglobulin superfamily domains	4/63	89/17910	0.000271325	0.00428122	0.00322884	TNFRSF13C/LTA/SASH3/CD40	4	BP
GO:0042102	positive regulation of T cell proliferation	4/63	90/17910	0.000283201	0.00442206	0.00333506	TNFRSF13C/CLECL1/CORO1A/SASH3	4	BP
GO:0004888	transmembrane signaling receptor activity	13/59	1133/16967	0.000110688	0.00444967	0.00370514	TLR10/IL21R/CD79A/CD72/P2RX5/CSF2RB/HLA-DOB/CXCR5/CNR2/CD79B/GPR18/CD27/IL2RG	13	MF
GO:0033209	tumor necrosis factor-mediated signaling pathway	5/63	167/17910	0.000301516	0.00465952	0.00351415	TNFRSF13C/TNFRSF13B/LTA/CD27/CD40	5	BP
GO:0098609	cell-cell adhesion	10/63	771/17910	0.000332829	0.00488949	0.00368759	TNFRSF13C/CLECL1/CORO1A/CD83/CSK/RAC2/TIGIT/SASH3/CD27/DTX1	10	BP
GO:0002821	positive regulation of adaptive immune response	4/63	94/17910	0.000334458	0.00488949	0.00368759	TNFRSF13C/LTA/SASH3/CD40	4	BP
GO:0008283	cell proliferation	17/63	1969/17910	0.000335147	0.00488949	0.00368759	CD79A/CD19/TNFRSF13C/FCRL3/MS4A1/CLECL1/CORO1A/CD22/MAP4K1/LTA/CSK/IKZF3/TCL1A/RAC2/SASH3/ELL3/CD40	17	BP
GO:0038114	interleukin-21-mediated signaling pathway	2/63	8/17910	0.000336359	0.00488949	0.00368759	IL21R/IL2RG	2	BP
GO:0098756	response to interleukin-21	2/63	8/17910	0.000336359	0.00488949	0.00368759	IL21R/IL2RG	2	BP
GO:0098757	cellular response to interleukin-21	2/63	8/17910	0.000336359	0.00488949	0.00368759	IL21R/IL2RG	2	BP
GO:0071356	cellular response to tumor necrosis factor	6/63	266/17910	0.00033923	0.00488949	0.00368759	TNFRSF13C/TNFRSF13B/LTA/TCL1A/CD27/CD40	6	BP
GO:1902105	regulation of leukocyte differentiation	6/63	267/17910	0.000346085	0.00489767	0.00369376	FCRL3/CD83/IKZF3/SASH3/CD27/DTX1	6	BP
GO:0030890	positive regulation of B cell proliferation	3/63	39/17910	0.000346333	0.00489767	0.00369376	TNFRSF13C/FCRL3/CD40	3	BP
GO:0004896	cytokine receptor activity	4/59	78/16967	0.000155254	0.005201	0.00433076	IL21R/CSF2RB/CXCR5/IL2RG	4	MF
GO:0042098	T cell proliferation	5/63	177/17910	0.000393929	0.00551869	0.00416213	TNFRSF13C/CLECL1/CORO1A/RAC2/SASH3	5	BP
GO:0045785	positive regulation of cell adhesion	7/63	388/17910	0.000413297	0.0057364	0.00432632	TNFRSF13C/CLECL1/CORO1A/CD83/CSK/SASH3/CD27	7	BP
GO:0034612	response to tumor necrosis factor	6/63	284/17910	0.000480182	0.0066036	0.00498035	TNFRSF13C/TNFRSF13B/LTA/TCL1A/CD27/CD40	6	BP
GO:0006816	calcium ion transport	7/63	415/17910	0.000616856	0.00840606	0.00633974	CD19/P2RX5/FCRL3/MS4A1/CORO1A/MCOLN2/IL16	7	BP
GO:0032653	regulation of interleukin-10 production	3/63	48/17910	0.000640849	0.00865435	0.006527	CD83/TIGIT/SASH3	3	BP
GO:0002638	negative regulation of immunoglobulin production	2/63	11/17910	0.000656222	0.00873745	0.00658967	FCRL3/CD22	2	BP
GO:0007155	cell adhesion	13/63	1338/17910	0.00065866	0.00873745	0.00658967	CD72/TNFRSF13C/CLECL1/CORO1A/CD83/CD22/CSK/LPXN/RAC2/TIGIT/SASH3/CD27/DTX1	13	BP
GO:0022610	biological adhesion	13/63	1345/17910	0.000691805	0.00909662	0.00686055	CD72/TNFRSF13C/CLECL1/CORO1A/CD83/CD22/CSK/LPXN/RAC2/TIGIT/SASH3/CD27/DTX1	13	BP
GO:0042609	CD4 receptor binding	2/59	8/16967	0.000328408	0.00943	0.00785216	CD22/IL16	2	MF
GO:0032613	interleukin-10 production	3/63	51/17910	0.000765836	0.00998251	0.00752868	CD83/TIGIT/SASH3	3	BP
GO:0048513	animal organ development	23/63	3403/17910	0.00083217	0.0105967	0.0079919	CD79A/CD19/PAX5/RELB/FCRL3/MS4A1/CXCR5/MEF2B/GPR18/CD83/BATF/NFKB2/LTA/PLA2G2D/KBTBD8/CSK/IKZF3/BCL2A1/SASH3/CD27/ELL3/POU2F2/DTX1	23	BP
GO:0009605	response to external stimulus	18/63	2331/17910	0.000832184	0.0105967	0.0079919	TLR10/CD19/P2RX5/CSF2RB/MS4A1/CXCR5/CNR2/CORO1A/CD79B/GPR18/BATF/NFKB2/KLHL6/LTA/IKZF3/IL16/RAC2/CD40	18	BP
GO:0002252	immune effector process	12/63	1197/17910	0.000834164	0.0105967	0.0079919	CD19/RELB/FCRL3/CORO1A/BATF/CD22/LTA/RAC2/SASH3/CD27/POU2F2/CD40	12	BP
GO:0002697	regulation of immune effector process	7/63	441/17910	0.000881623	0.0111055	0.00837562	CD19/FCRL3/CD22/LTA/RAC2/SASH3/CD40	7	BP
GO:0002381	immunoglobulin production involved in immunoglobulin mediated immune response	3/63	55/17910	0.000955187	0.0119319	0.00899886	BATF/POU2F2/CD40	3	BP
GO:0070838	divalent metal ion transport	7/63	454/17910	0.00104408	0.0129345	0.00975502	CD19/P2RX5/FCRL3/MS4A1/CORO1A/MCOLN2/IL16	7	BP
GO:0072511	divalent inorganic cation transport	7/63	458/17910	0.00109855	0.0134977	0.0101798	CD19/P2RX5/FCRL3/MS4A1/CORO1A/MCOLN2/IL16	7	BP
GO:0051707	response to other organism	10/63	903/17910	0.00113439	0.0138248	0.0104265	CSF2RB/MS4A1/CNR2/CD79B/BATF/NFKB2/KLHL6/LTA/IKZF3/CD40	10	BP
GO:0043207	response to external biotic stimulus	10/63	905/17910	0.00115353	0.0139447	0.0105169	CSF2RB/MS4A1/CNR2/CD79B/BATF/NFKB2/KLHL6/LTA/IKZF3/CD40	10	BP
GO:0002822	regulation of adaptive immune response based on somatic recombination of immune receptors built from immunoglobulin superfamily domains	4/63	135/17910	0.00130353	0.0156319	0.0117894	TNFRSF13C/LTA/SASH3/CD40	4	BP
GO:0002637	regulation of immunoglobulin production	3/63	62/17910	0.00135311	0.0159709	0.0120451	FCRL3/CD22/CD40	3	BP
GO:0032729	positive regulation of interferon-gamma production	3/63	62/17910	0.00135311	0.0159709	0.0120451	TNFRSF13C/LTA/SASH3	3	BP
GO:0002700	regulation of production of molecular mediator of immune response	4/63	138/17910	0.00141358	0.0165544	0.0124851	FCRL3/CD22/SASH3/CD40	4	BP
GO:0008284	positive regulation of cell proliferation	10/63	931/17910	0.00142751	0.0165879	0.0125104	TNFRSF13C/FCRL3/CLECL1/CORO1A/LTA/TCL1A/RAC2/SASH3/ELL3/CD40	10	BP
GO:0045580	regulation of T cell differentiation	4/63	139/17910	0.00145167	0.0167388	0.0126242	CD83/SASH3/CD27/DTX1	4	BP
GO:0009607	response to biotic stimulus	10/63	938/17910	0.00150974	0.0172084	0.0129783	CSF2RB/MS4A1/CNR2/CD79B/BATF/NFKB2/KLHL6/LTA/IKZF3/CD40	10	BP
GO:0070887	cellular response to chemical stimulus	21/63	3100/17910	0.00151535	0.0172084	0.0129783	IL21R/IL17REL/TNFRSF13C/CSF2RB/CXCR5/CNR2/TNFRSF13B/CORO1A/GPR18/BATF/MAP4K1/LTA/CSK/TCL1A/IL16/RAC2/CD27/IL2RG/NCF1/CD40/DTX1	21	BP
GO:0048535	lymph node development	2/63	17/17910	0.00160073	0.0180414	0.0136066	CXCR5/LTA	2	BP
GO:0051924	regulation of calcium ion transport	5/63	244/17910	0.00166441	0.018619	0.0140422	CD19/P2RX5/FCRL3/CORO1A/IL16	5	BP
GO:0010033	response to organic substance	21/63	3138/17910	0.00177373	0.0196594	0.0148268	IL21R/IL17REL/P2RX5/TNFRSF13C/CSF2RB/CXCR5/CNR2/TNFRSF13B/CORO1A/CD83/BATF/NFKB2/MAP4K1/LTA/CSK/TCL1A/IL16/CD27/IL2RG/CD40/DTX1	21	BP
GO:0043011	myeloid dendritic cell differentiation	2/63	18/17910	0.00179675	0.0196594	0.0148268	RELB/BATF	2	BP
GO:0051023	regulation of immunoglobulin secretion	2/63	18/17910	0.00179675	0.0196594	0.0148268	CD22/CD40	2	BP
GO:0002312	B cell activation involved in immune response	3/63	71/17910	0.00199945	0.0216105	0.0162984	CD19/BATF/CD40	3	BP
GO:0006874	cellular calcium ion homeostasis	6/63	375/17910	0.00201301	0.0216105	0.0162984	CD19/P2RX5/MS4A1/CORO1A/MCOLN2/CD40	6	BP
GO:0007204	positive regulation of cytosolic calcium ion concentration	5/63	255/17910	0.00201833	0.0216105	0.0162984	CD19/P2RX5/MS4A1/CORO1A/MCOLN2	5	BP
GO:0002443	leukocyte mediated immunity	9/63	814/17910	0.00206935	0.0219997	0.0165919	CD19/CORO1A/BATF/LTA/RAC2/SASH3/CD27/POU2F2/CD40	9	BP
GO:0042832	defense response to protozoan	2/63	20/17910	0.00222118	0.0234475	0.0176838	BATF/CD40	2	BP
GO:0055074	calcium ion homeostasis	6/63	388/17910	0.00238727	0.0250246	0.0188732	CD19/P2RX5/MS4A1/CORO1A/MCOLN2/CD40	6	BP
GO:0001562	response to protozoan	2/63	21/17910	0.00244944	0.025498	0.0192302	BATF/CD40	2	BP
GO:0072503	cellular divalent inorganic cation homeostasis	6/63	392/17910	0.00251237	0.0259727	0.0195883	CD19/P2RX5/MS4A1/CORO1A/MCOLN2/CD40	6	BP
GO:0009966	regulation of signal transduction	21/63	3265/17910	0.00293268	0.0301102	0.0227087	CD19/PAX5/BLK/P2RX5/FCRL3/FCRL2/GCSAM/RGS13/ARHGAP25/CD22/MAP4K1/LTA/CSK/LPXN/IL16/RAC2/CD27/ELL3/NCF1/CD40/DTX1	21	BP
GO:0009306	protein secretion	7/63	549/17910	0.00306811	0.0312864	0.0235958	TLR10/BLK/CLECL1/CD22/MCOLN2/POU2F2/CD40	7	BP
GO:0045582	positive regulation of T cell differentiation	3/63	83/17910	0.00311955	0.031596	0.0238293	CD83/SASH3/CD27	3	BP
GO:0072507	divalent inorganic cation homeostasis	6/63	412/17910	0.00321356	0.0323297	0.0243827	CD19/P2RX5/MS4A1/CORO1A/MCOLN2/CD40	6	BP
GO:0035556	intracellular signal transduction	18/63	2624/17910	0.00323639	0.0323423	0.0243922	CD19/RELB/BLK/P2RX5/CSF2RB/FCRL3/ARHGAP25/BATF/CD22/NFKB2/MAP4K1/CSK/RAC2/CD27/IL2RG/ELL3/NCF1/CD40	18	BP
GO:0051480	regulation of cytosolic calcium ion concentration	5/63	289/17910	0.00346172	0.0341977	0.0257914	CD19/P2RX5/MS4A1/CORO1A/MCOLN2	5	BP
GO:0002335	mature B cell differentiation	2/63	25/17910	0.00346768	0.0341977	0.0257914	CD19/POU2F2	2	BP
GO:0001818	negative regulation of cytokine production	5/63	290/17910	0.00351305	0.0344187	0.0259581	RELB/GPR18/CD83/CSK/TIGIT	5	BP
GO:0023026	MHC class II protein complex binding	2/59	16/16967	0.0013825	0.0347352	0.0289233	HLA-DOB/MS4A1	2	MF
GO:0032496	response to lipopolysaccharide	5/63	295/17910	0.00377794	0.0367736	0.0277342	CSF2RB/CNR2/NFKB2/LTA/CD40	5	BP
GO:0032673	regulation of interleukin-4 production	2/63	27/17910	0.00403888	0.0388524	0.029302	CD83/SASH3	2	BP
GO:0002708	positive regulation of lymphocyte mediated immunity	3/63	91/17910	0.00404334	0.0388524	0.029302	LTA/SASH3/CD40	3	BP
GO:0002703	regulation of leukocyte mediated immunity	4/63	185/17910	0.00408396	0.0389927	0.0294078	LTA/RAC2/SASH3/CD40	4	BP
GO:0010646	regulation of cell communication	22/63	3589/17910	0.00413923	0.0392703	0.0296171	CD19/PAX5/BLK/P2RX5/FCRL3/CNR2/FCRL2/GCSAM/RGS13/ARHGAP25/CD22/MAP4K1/LTA/CSK/LPXN/IL16/RAC2/CD27/ELL3/NCF1/CD40/DTX1	22	BP
GO:0002790	peptide secretion	7/63	582/17910	0.00422723	0.039853	0.0300566	TLR10/BLK/CLECL1/CD22/MCOLN2/POU2F2/CD40	7	BP
GO:0032649	regulation of interferon-gamma production	3/63	93/17910	0.00429753	0.0400124	0.0301768	TNFRSF13C/LTA/SASH3	3	BP
GO:0045621	positive regulation of lymphocyte differentiation	3/63	93/17910	0.00429753	0.0400124	0.0301768	CD83/SASH3/CD27	3	BP
GO:0001773	myeloid dendritic cell activation	2/63	28/17910	0.00433975	0.0401561	0.0302852	RELB/BATF	2	BP
GO:0002237	response to molecule of bacterial origin	5/63	309/17910	0.00459583	0.0422647	0.0318755	CSF2RB/CNR2/NFKB2/LTA/CD40	5	BP
GO:0048873	homeostasis of number of cells within a tissue	2/63	29/17910	0.00465069	0.0422806	0.0318875	CORO1A/SASH3	2	BP
GO:0042127	regulation of cell proliferation	13/63	1664/17910	0.00465397	0.0422806	0.0318875	TNFRSF13C/FCRL3/CLECL1/CORO1A/CD22/LTA/CSK/IKZF3/TCL1A/RAC2/SASH3/ELL3/CD40	13	BP
GO:0023051	regulation of signaling	22/63	3635/17910	0.00485826	0.0438707	0.0330867	CD19/PAX5/BLK/P2RX5/FCRL3/CNR2/FCRL2/GCSAM/RGS13/ARHGAP25/CD22/MAP4K1/LTA/CSK/LPXN/IL16/RAC2/CD27/ELL3/NCF1/CD40/DTX1	22	BP
GO:0032743	positive regulation of interleukin-2 production	2/63	30/17910	0.00497165	0.0441257	0.033279	CD83/SASH3	2	BP
GO:0043372	positive regulation of CD4-positive, alpha-beta T cell differentiation	2/63	30/17910	0.00497165	0.0441257	0.033279	CD83/SASH3	2	BP
GO:0010522	regulation of calcium ion transport into cytosol	3/63	98/17910	0.00497481	0.0441257	0.033279	CD19/P2RX5/CORO1A	3	BP
GO:0002699	positive regulation of immune effector process	4/63	198/17910	0.00519147	0.0457765	0.0345241	LTA/RAC2/SASH3/CD40	4	BP
GO:0001228	DNA-binding transcription activator activity, RNA polymerase II-specific	6/59	390/16967	0.00228914	0.051124	0.0425699	PAX5/MEF2B/BATF/NFKB2/IKZF3/POU2F2	6	MF
GO:0006875	cellular metal ion homeostasis	6/63	467/17910	0.00589671	0.051691	0.0389847	CD19/P2RX5/MS4A1/CORO1A/MCOLN2/CD40	6	BP
GO:0045121	membrane raft	5/62	309/18675	0.00359661	0.0517122	0.0453616	CD79A/CD19/MS4A1/CD48/CSK	5	CC
GO:0001891	phagocytic cup	2/62	27/18675	0.00360838	0.0517122	0.0453616	CORO1A/ARHGAP25	2	CC
GO:0098857	membrane microdomain	5/62	310/18675	0.00364637	0.0517122	0.0453616	CD79A/CD19/MS4A1/CD48/CSK	5	CC
GO:1903706	regulation of hemopoiesis	6/63	468/17910	0.00595712	0.051912	0.0391514	FCRL3/CD83/IKZF3/SASH3/CD27/DTX1	6	BP
GO:0071353	cellular response to interleukin-4	2/63	33/17910	0.00599382	0.051912	0.0391514	CORO1A/IL2RG	2	BP
GO:0032609	interferon-gamma production	3/63	105/17910	0.00602581	0.051912	0.0391514	TNFRSF13C/LTA/SASH3	3	BP
GO:0071310	cellular response to organic substance	17/63	2564/17910	0.0061582	0.0527494	0.0397829	IL21R/IL17REL/TNFRSF13C/CSF2RB/CXCR5/TNFRSF13B/CORO1A/BATF/MAP4K1/LTA/CSK/TCL1A/IL16/CD27/IL2RG/CD40/DTX1	17	BP
GO:0045730	respiratory burst	2/63	34/17910	0.00635408	0.054118	0.0408151	RAC2/NCF1	2	BP
GO:0098589	membrane region	5/62	321/18675	0.00422694	0.0549503	0.048202	CD79A/CD19/MS4A1/CD48/CSK	5	CC
GO:0002701	negative regulation of production of molecular mediator of immune response	2/63	35/17910	0.006724	0.056945	0.0429472	FCRL3/CD22	2	BP
GO:0019865	immunoglobulin binding	2/59	23/16967	0.00286955	0.0570041	0.0474661	MS4A1/CD22	2	MF
GO:0023023	MHC protein complex binding	2/59	25/16967	0.00338748	0.0570041	0.0474661	HLA-DOB/MS4A1	2	MF
GO:0044212	transcription regulatory region DNA binding	8/59	739/16967	0.00387409	0.0570041	0.0474661	PAX5/RELB/POU2AF1/MEF2B/NFKB2/IKZF3/ELL3/POU2F2	8	MF
GO:0001067	regulatory region nucleic acid binding	8/59	740/16967	0.00390587	0.0570041	0.0474661	PAX5/RELB/POU2AF1/MEF2B/NFKB2/IKZF3/ELL3/POU2F2	8	MF
GO:0000977	RNA polymerase II regulatory region sequence-specific DNA binding	7/59	594/16967	0.00438243	0.0570041	0.0474661	PAX5/RELB/POU2AF1/MEF2B/NFKB2/IKZF3/POU2F2	7	MF
GO:0001012	RNA polymerase II regulatory region DNA binding	7/59	596/16967	0.00446326	0.0570041	0.0474661	PAX5/RELB/POU2AF1/MEF2B/NFKB2/IKZF3/POU2F2	7	MF
GO:0016651	oxidoreductase activity, acting on NAD(P)H	3/59	96/16967	0.00453764	0.0570041	0.0474661	NCF1C/NCF1B/NCF1	3	MF
GO:0001894	tissue homeostasis	4/63	214/17910	0.00681093	0.0573573	0.0432581	CORO1A/CSK/RAC2/SASH3	4	BP
GO:0070670	response to interleukin-4	2/63	36/17910	0.00710349	0.0591563	0.0446149	CORO1A/IL2RG	2	BP
GO:2000516	positive regulation of CD4-positive, alpha-beta T cell activation	2/63	36/17910	0.00710349	0.0591563	0.0446149	CD83/SASH3	2	BP
GO:0051209	release of sequestered calcium ion into cytosol	3/63	112/17910	0.0072002	0.0593027	0.0447254	CD19/CORO1A/MCOLN2	3	BP
GO:0051283	negative regulation of sequestering of calcium ion	3/63	112/17910	0.0072002	0.0593027	0.0447254	CD19/CORO1A/MCOLN2	3	BP
GO:0019725	cellular homeostasis	8/63	814/17910	0.00746286	0.0607094	0.0457863	CD19/P2RX5/MS4A1/CORO1A/MCOLN2/RAC2/NCF1/CD40	8	BP
GO:0002714	positive regulation of B cell mediated immunity	2/63	37/17910	0.00749249	0.0607094	0.0457863	LTA/CD40	2	BP
GO:0002891	positive regulation of immunoglobulin mediated immune response	2/63	37/17910	0.00749249	0.0607094	0.0457863	LTA/CD40	2	BP
GO:0051282	regulation of sequestering of calcium ion	3/63	114/17910	0.00755889	0.0609181	0.0459437	CD19/CORO1A/MCOLN2	3	BP
GO:0043410	positive regulation of MAPK cascade	6/63	499/17910	0.00806445	0.0643736	0.0485497	FCRL3/MAP4K1/CSK/CD27/NCF1/CD40	6	BP
GO:0002705	positive regulation of leukocyte mediated immunity	3/63	117/17910	0.00811649	0.0643736	0.0485497	LTA/SASH3/CD40	3	BP
GO:0051208	sequestering of calcium ion	3/63	117/17910	0.00811649	0.0643736	0.0485497	CD19/CORO1A/MCOLN2	3	BP
GO:0033003	regulation of mast cell activation	2/63	39/17910	0.00829875	0.0654728	0.0493787	CNR2/RAC2	2	BP
GO:1902533	positive regulation of intracellular signal transduction	9/63	1019/17910	0.00896017	0.0703209	0.0530351	CD19/P2RX5/FCRL3/MAP4K1/CSK/RAC2/CD27/NCF1/CD40	9	BP
GO:0010959	regulation of metal ion transport	5/63	365/17910	0.00914822	0.0714228	0.0538662	CD19/P2RX5/FCRL3/CORO1A/IL16	5	BP
GO:0046330	positive regulation of JNK cascade	3/63	124/17910	0.00951001	0.0738627	0.0557063	MAP4K1/CD27/NCF1	3	BP
GO:0030003	cellular cation homeostasis	6/63	518/17910	0.00959628	0.0741486	0.0559219	CD19/P2RX5/MS4A1/CORO1A/MCOLN2/CD40	6	BP
GO:0001772	immunological synapse	2/62	36/18675	0.0063536	0.0762432	0.06688	CD37/CORO1A	2	CC
GO:0097553	calcium ion transmembrane import into cytosol	3/63	126/17910	0.00993221	0.0763507	0.0575827	CD19/CORO1A/MCOLN2	3	BP
GO:0097028	dendritic cell differentiation	2/63	43/17910	0.0100224	0.0766507	0.057809	RELB/BATF	2	BP
GO:0002266	follicular dendritic cell activation	1/63	3/17910	0.0105163	0.0780391	0.0588561	NFKB2	1	BP
GO:0002581	negative regulation of antigen processing and presentation of peptide or polysaccharide antigen via MHC class II	1/63	3/17910	0.0105163	0.0780391	0.0588561	HLA-DOB	1	BP
GO:0002636	positive regulation of germinal center formation	1/63	3/17910	0.0105163	0.0780391	0.0588561	TNFRSF13C	1	BP
GO:0002874	regulation of chronic inflammatory response to antigenic stimulus	1/63	3/17910	0.0105163	0.0780391	0.0588561	LTA	1	BP
GO:0031296	B cell costimulation	1/63	3/17910	0.0105163	0.0780391	0.0588561	TNFRSF13C	1	BP
GO:0051025	negative regulation of immunoglobulin secretion	1/63	3/17910	0.0105163	0.0780391	0.0588561	CD22	1	BP
GO:0006873	cellular ion homeostasis	6/63	531/17910	0.010758	0.0790502	0.0596186	CD19/P2RX5/MS4A1/CORO1A/MCOLN2/CD40	6	BP
GO:0055065	metal ion homeostasis	6/63	531/17910	0.010758	0.0790502	0.0596186	CD19/P2RX5/MS4A1/CORO1A/MCOLN2/CD40	6	BP
GO:0000976	transcription regulatory region sequence-specific DNA binding	7/59	644/16967	0.00676507	0.079987	0.0666034	PAX5/RELB/POU2AF1/MEF2B/NFKB2/IKZF3/POU2F2	7	MF
GO:0004715	non-membrane spanning protein tyrosine kinase activity	2/59	37/16967	0.00732188	0.081761	0.0680806	BLK/CSK	2	MF
GO:0033674	positive regulation of kinase activity	6/63	541/17910	0.0117175	0.0844733	0.0637087	CD19/MAP4K1/CSK/TCL1A/NCF1/CD40	6	BP
GO:0000165	MAPK cascade	8/63	882/17910	0.0117942	0.0844733	0.0637087	CSF2RB/FCRL3/MAP4K1/CSK/CD27/IL2RG/NCF1/CD40	8	BP
GO:0002204	somatic recombination of immunoglobulin genes involved in immune response	2/63	47/17910	0.0118905	0.0844733	0.0637087	BATF/CD40	2	BP
GO:0002208	somatic diversification of immunoglobulins involved in immune response	2/63	47/17910	0.0118905	0.0844733	0.0637087	BATF/CD40	2	BP
GO:0043370	regulation of CD4-positive, alpha-beta T cell differentiation	2/63	47/17910	0.0118905	0.0844733	0.0637087	CD83/SASH3	2	BP
GO:0045190	isotype switching	2/63	47/17910	0.0118905	0.0844733	0.0637087	BATF/CD40	2	BP
GO:0046638	positive regulation of alpha-beta T cell differentiation	2/63	47/17910	0.0118905	0.0844733	0.0637087	CD83/SASH3	2	BP
GO:0023014	signal transduction by protein phosphorylation	8/63	886/17910	0.0120971	0.0855354	0.0645097	CSF2RB/FCRL3/MAP4K1/CSK/CD27/IL2RG/NCF1/CD40	8	BP
GO:0002706	regulation of lymphocyte mediated immunity	3/63	136/17910	0.0122061	0.0859012	0.0647855	LTA/SASH3/CD40	3	BP
GO:0002686	negative regulation of leukocyte migration	2/63	48/17910	0.0123796	0.086651	0.0653511	GCSAM/GPR18	2	BP
GO:0048731	system development	25/63	4670/17910	0.0124283	0.086651	0.0653511	CD79A/CD19/PAX5/RELB/P2RX5/FCRL3/MS4A1/CXCR5/MEF2B/GPR18/CD83/BATF/NFKB2/LTA/PLA2G2D/KBTBD8/CSK/IKZF3/BCL2A1/SASH3/CD27/ELL3/POU2F2/CD40/DTX1	25	BP
GO:0006935	chemotaxis	6/63	551/17910	0.0127363	0.0883874	0.0666607	CXCR5/CNR2/CORO1A/GPR18/IL16/RAC2	6	BP
GO:0016447	somatic recombination of immunoglobulin gene segments	2/63	49/17910	0.0128774	0.0889552	0.0670889	BATF/CD40	2	BP
GO:0042330	taxis	6/63	553/17910	0.0129473	0.0890277	0.0671435	CXCR5/CNR2/CORO1A/GPR18/IL16/RAC2	6	BP
GO:0016477	cell migration	11/63	1474/17910	0.0130228	0.0891377	0.0672265	CXCR5/CNR2/CORO1A/GCSAM/VPREB3/GPR18/CD48/MCOLN2/IL16/RAC2/CD40	11	BP
GO:0031325	positive regulation of cellular metabolic process	18/63	3007/17910	0.0134709	0.0900523	0.0679163	CD19/PAX5/POU2AF1/TNFRSF13C/ZC3H12D/FCRL3/MEF2B/BATF/NFKB2/MAP4K1/CSK/TCL1A/CD27/ELL3/POU2F2/NCF1/CD40/DTX1	18	BP
GO:0002712	regulation of B cell mediated immunity	2/63	51/17910	0.0138989	0.0900523	0.0679163	LTA/CD40	2	BP
GO:0002889	regulation of immunoglobulin mediated immune response	2/63	51/17910	0.0138989	0.0900523	0.0679163	LTA/CD40	2	BP
GO:1902107	positive regulation of leukocyte differentiation	3/63	143/17910	0.0139615	0.0900523	0.0679163	CD83/SASH3/CD27	3	BP
GO:0002322	B cell proliferation involved in immune response	1/63	4/17910	0.0139975	0.0900523	0.0679163	CD19	1	BP
GO:0002439	chronic inflammatory response to antigenic stimulus	1/63	4/17910	0.0139975	0.0900523	0.0679163	LTA	1	BP
GO:0002584	negative regulation of antigen processing and presentation of peptide antigen	1/63	4/17910	0.0139975	0.0900523	0.0679163	HLA-DOB	1	BP
GO:0002586	regulation of antigen processing and presentation of peptide antigen via MHC class II	1/63	4/17910	0.0139975	0.0900523	0.0679163	HLA-DOB	1	BP
GO:0002678	positive regulation of chronic inflammatory response	1/63	4/17910	0.0139975	0.0900523	0.0679163	LTA	1	BP
GO:0033590	response to cobalamin	1/63	4/17910	0.0139975	0.0900523	0.0679163	CD40	1	BP
GO:0042997	negative regulation of Golgi to plasma membrane protein transport	1/63	4/17910	0.0139975	0.0900523	0.0679163	CSK	1	BP
GO:0060753	regulation of mast cell chemotaxis	1/63	4/17910	0.0139975	0.0900523	0.0679163	RAC2	1	BP
GO:0061502	early endosome to recycling endosome transport	1/63	4/17910	0.0139975	0.0900523	0.0679163	CORO1A	1	BP
GO:0071593	lymphocyte aggregation	1/63	4/17910	0.0139975	0.0900523	0.0679163	RAC2	1	BP
GO:1990837	sequence-specific double-stranded DNA binding	7/59	674/16967	0.00859681	0.0909452	0.0757281	PAX5/RELB/POU2AF1/MEF2B/NFKB2/IKZF3/POU2F2	7	MF
GO:0043085	positive regulation of catalytic activity	10/63	1293/17910	0.0142361	0.0911961	0.0687789	CD19/FCRL3/NCF1C/ARHGAP25/MAP4K1/CSK/TCL1A/NCF1B/NCF1/CD40	10	BP
GO:0004911	interleukin-2 receptor activity	1/59	3/16967	0.0103964	0.0949852	0.0790922	IL2RG	1	MF
GO:0004949	cannabinoid receptor activity	1/59	3/16967	0.0103964	0.0949852	0.0790922	CNR2	1	MF
GO:0042010	interleukin-15 receptor activity	1/59	3/16967	0.0103964	0.0949852	0.0790922	IL2RG	1	MF
GO:0019903	protein phosphatase binding	3/59	132/16967	0.0108962	0.0952237	0.0792908	FCRL3/CD22/CSK	3	MF
GO:0032655	regulation of interleukin-12 production	2/63	53/17910	0.0149544	0.0953901	0.071942	TIGIT/CD40	2	BP
GO:0030246	carbohydrate binding	4/59	252/16967	0.0114192	0.0956358	0.0796339	CLEC17A/CD72/CLECL1/CD22	4	MF
GO:0010524	positive regulation of calcium ion transport into cytosol	2/63	54/17910	0.0154948	0.0980028	0.0739124	CD19/P2RX5	2	BP
GO:0032663	regulation of interleukin-2 production	2/63	54/17910	0.0154948	0.0980028	0.0739124	CD83/SASH3	2	BP
GO:0045335	phagocytic vesicle	3/62	128/18675	0.00886238	0.0987523	0.0866248	CORO1A/RAC2/NCF1	3	CC

## Sheet: KEGG
ID	Description	GeneRatio	BgRatio	pvalue	p.adjust	qvalue	geneID	Count	one_type	two_type
hsa05340	Primary immunodeficiency	6/37	38/7914	1.6919e-08	1.4212e-06	1.10419e-06	CD79A/CD19/TNFRSF13C/TNFRSF13B/IL2RG/CD40	6	Human Diseases	Immune disease
hsa04060	Cytokine-cytokine receptor interaction	10/37	294/7914	6.14146e-07	2.57941e-05	2.00406e-05	IL21R/TNFRSF13C/CSF2RB/CXCR5/TNFRSF13B/LTA/IL16/CD27/IL2RG/CD40	10	Environmental Information Processing	Signaling molecules and interaction
hsa04662	B cell receptor signaling pathway	6/37	82/7914	1.85003e-06	5.18008e-05	4.02462e-05	CD79A/CD19/CD72/CD79B/CD22/RAC2	6	Organismal Systems	Immune system
hsa04064	NF-kappa B signaling pathway	6/37	102/7914	6.64972e-06	0.000139644	0.000108495	RELB/TNFRSF13C/NFKB2/LTA/BCL2A1/CD40	6	Environmental Information Processing	Signal transduction
hsa05166	Human T-cell leukemia virus 1 infection	7/37	219/7914	5.72889e-05	0.000962453	0.000747771	RELB/TNFRSF13C/HLA-DOB/NFKB2/LTA/IL2RG/CD40	7	Human Diseases	Infectious disease: viral
hsa04672	Intestinal immune network for IgA production	4/37	49/7914	7.37216e-05	0.00100413	0.00078015	TNFRSF13C/HLA-DOB/TNFRSF13B/CD40	4	Organismal Systems	Immune system
hsa04640	Hematopoietic cell lineage	5/37	98/7914	8.36774e-05	0.00100413	0.00078015	CD19/HLA-DOB/MS4A1/CD37/CD22	5	Organismal Systems	Immune system
hsa05169	Epstein-Barr virus infection	5/37	201/7914	0.00226221	0.0237532	0.0184549	CD19/RELB/HLA-DOB/NFKB2/CD40	5	Human Diseases	Infectious disease: viral
hsa05416	Viral myocarditis	3/37	60/7914	0.00268024	0.0250155	0.0194356	HLA-DOB/RAC2/CD40	3	Human Diseases	Cardiovascular disease
hsa05321	Inflammatory bowel disease (IBD)	3/37	65/7914	0.00336679	0.028281	0.0219727	IL21R/HLA-DOB/IL2RG	3	Human Diseases	Immune disease
hsa04514	Cell adhesion molecules (CAMs)	4/37	147/7914	0.00468792	0.0357986	0.0278135	HLA-DOB/CD22/TIGIT/CD40	4	Environmental Information Processing	Signaling molecules and interaction
hsa05310	Asthma	2/37	31/7914	0.00908171	0.063572	0.0493918	HLA-DOB/CD40	2	Human Diseases	Immune disease
hsa04061	Viral protein interaction with cytokine and cytokine receptor	3/37	100/7914	0.0111442	0.072009	0.0559468	CXCR5/LTA/IL2RG	3	Environmental Information Processing	Signaling molecules and interaction
hsa04659	Th17 cell differentiation	3/37	107/7914	0.0133776	0.0753286	0.058526	IL21R/HLA-DOB/IL2RG	3	Organismal Systems	Immune system
hsa05330	Allograft rejection	2/37	38/7914	0.0134515	0.0753286	0.058526	HLA-DOB/CD40	2	Human Diseases	Immune disease
hsa04940	Type I diabetes mellitus	2/37	43/7914	0.0170279	0.0893962	0.0694557	HLA-DOB/LTA	2	Human Diseases	Endocrine and metabolic disease
